# Supplementary material
Source: PubMed Central journal article supplement (PMC4843768)

**Enantioselective Indoline Synthesis by a Conjugate Addition/Asymmetric  
Protonation/Aza-Prins Cyclization Cascade**

Blake E. Daniels<sup>‡</sup>, Jane Ni<sup>‡</sup>, and Sarah E. Reisman\*

*The Warren and Katharine Schlinger Laboratory of Chemistry and Chemical Engineering  
Division of Chemistry and Chemical Engineering, California Institute of Technology, Pasadena,  
California 91125  
reisman@caltech.edu*

**Supporting Information 1 (Experimental Procedures):**

## Table of Contents

|                                                                                          |     |
|------------------------------------------------------------------------------------------|-----|
| 1. General considerations                                                                | S3  |
| 2. Procedures for substrate synthesis                                                    | S4  |
| 3. Procedure for conjugate addition/asymmetric protonation/aza-Prins cyclization cascade | S15 |
| 4. Catalyst Optimization                                                                 | S25 |
| 5. SFC/HPLC traces of racemic and enantioenriched indolines                              | S26 |
| 6. Synthesis of deuterated amidoacrylate <b>2a-d<sub>1</sub></b>                         | S41 |
| 7. Epimerization studies                                                                 | S45 |
| 8. Unsuccessful substrates                                                               | S48 |
| 9. References                                                                            | S50 |
| 10. <sup>1</sup> H and <sup>13</sup> C NMR Spectra for New Compounds                     | S51 |

**General Considerations.** Unless otherwise stated, reactions were performed under a nitrogen atmosphere using freshly dried solvents. Tetrahydrofuran (THF), methylene chloride (CH<sub>2</sub>Cl<sub>2</sub>), toluene (PhMe), and dimethylformamide (DMF) were dried by passing through activated alumina columns. Dimethylformamide was dried over activated molecular sieves. All other commercially obtained reagents were used as received unless specifically indicated. (*R*)-BINOL was obtained from Alfa Aesar. Reactions were monitored by thin-layer chromatography using EMD/Merck silica gel 60 F254 pre-coated plates (0.25 mm) and were visualized by UV, *p*-anisaldehyde, CAM, or KMnO<sub>4</sub> staining. Flash column chromatography was performed either as described by Still et al.<sup>1</sup> using silica gel (particle size 0.032-0.063) purchased from Silicycle, or pre-packaged RediSep<sup>®</sup>Rf columns on a CombiFlash Rf system (Teledyne ISCO Inc.). Diastereomeric ratios were determined by integration of NMR spectra. Optical rotations were measured on a Jasco P-2000 polarimeter using a 100 mm path-length cell at 589 nm. <sup>1</sup>H and <sup>13</sup>C NMR spectra were recorded on a Varian Mercury 300 (at 300 MHz and 75 MHz, respectively), a Varian 400 (at 400 MHz and 100 MHz, respectively) or a Varian Inova 500 (at 500 MHz and 125 MHz, respectively), and are reported relative to internal chloroform (<sup>1</sup>H, δ = 7.26, <sup>13</sup>C, δ = 77.0). Data for <sup>1</sup>H NMR spectra are reported as follows: chemical shift (δ ppm) (multiplicity, coupling constant (Hz), integration). Multiplicity and qualifier abbreviations are as follows: s = singlet, d = doublet, t = triplet, q = quartet, m = multiplet, br = broad, app = apparent. IR spectra were recorded on a Perkin Elmer Paragon 1000 spectrometer and are reported in frequency of absorption (cm<sup>-1</sup>). Preparative HPLC was performed with either an Agilent 1100 or 1200 Series HPLC utilizing an Agilent Zorbax RX-SIL 5μm column (9.4 x 250 mm). Analytical SFC was performed with a Mettler SFC supercritical CO<sub>2</sub> analytical chromatography system with Chiralcel AD-H and OJ-H columns (4.6 mm x 25 cm). Melting points were determined using a Büchi B-545 capillary melting point apparatus and the values reported are uncorrected. HRMS were acquired using either an Agilent 6200 Series TOF with an Agilent G1978A Multimode source in electrospray ionization (ESI), atmospheric pressure chemical ionization (APCI) or mixed (MM) ionization mode.

## Indole Substrates for Conjugate Addition/Asymmetric Protonation/Prins Cyclization Cascade

### General Procedure A: Preparation of 3-(but-3-en-1-yl) N-H indoles

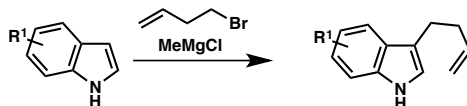

The preparation of 3-(but-3-en-1-yl)-indole derivatives was adapted from Youn et al.<sup>2</sup> To a solution of the indole substrate (1.00 equiv) in benzene was added a solution of MeMgCl (1.06 equiv, 3.0 M solution in THF) at rt. After 10 min, 4-bromobutene (0.86 equiv) was added and the reaction mixture was heated to reflux. After 27 h, the reaction mixture was cooled and quenched with sat. NH<sub>4</sub>Cl. The organic phase was separated and the aqueous phase was extracted twice with EtOAc. The organic layer was washed with water and brine, dried over MgSO<sub>4</sub>, and concentrated in vacuo. The residue was purified by column chromatography on silica gel.

### 3-(but-3-en-1-yl)-1H-indole

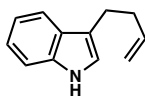

Prepared from indole (1.75 g, 15 mmol) according to General Procedure A to yield 3-(but-3-en-1-yl)-1H-indole in 41% yield (1.07 g). Spectral data of 3-(but-3-en-1-yl)-1H-indole were found to be in agreement with those reported in the literature.<sup>3</sup>

### 4-methyl-3-(but-3-en-1-yl)indole (S1)

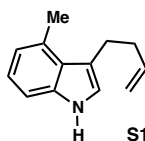

Prepared from 4-methylindole (2.6 g, 19.8 mmol) according to General Procedure A to yield 4-methyl-3-(but-3-en-1-yl)indole (**S1**) in 27% yield (983 mg). <sup>1</sup>H NMR (400 MHz, CDCl<sub>3</sub>) δ 7.89 (s, 1H), 7.19 (d, *J* = 8.1 Hz, 1H), 7.06 (t, *J* = 7.1 Hz, 1H), 6.95 (dt, *J* = 2.2, 1.0 Hz, 1H), 6.84 (dt, *J* = 7.1, 0.9 Hz, 1H), 5.97 (ddt, *J* = 16.8, 10.2, 6.5 Hz, 1H), 5.11 (dq, *J* = 17.1, 1.7 Hz, 1H), 5.02 (ddt, *J* = 10.2, 2.2, 1.2 Hz, 1H), 3.10 – 2.98 (m, 2H), 2.72 (s, 3H), 2.51 – 2.43 (m, 2H); <sup>13</sup>C NMR (101 MHz, CDCl<sub>3</sub>) δ 138.66, 136.75, 130.97, 125.93, 121.96, 121.29, 120.91, 117.25, 114.72, 108.98, 35.48, 26.82, 20.31; IR (NaCl/thin film) 3409, 1638, 1412, 1341, 1113, 910, 747 cm<sup>-1</sup>; HRMS (ESI) calc'd for C<sub>13</sub>H<sub>15</sub>N [M\*]<sup>+</sup> 185.1199, found 185.1200.

### 5-methyl-3-(but-3-en-1-yl)indole (S2)

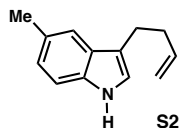

Prepared from 5-methylindole (2g, 15.2 mmol) according to General Procedure A to yield 5-methyl-3-(but-3-en-1-yl)indole (**S2**) in 48% yield (1.34 g).  $^1\text{H}$  NMR (500 MHz,  $\text{CDCl}_3$ )  $\delta$  7.82 (s, 1H), 7.42 (dq,  $J = 1.6, 0.8$  Hz, 1H), 7.30 – 7.24 (m, 1H), 7.07 – 7.03 (m, 1H), 6.98 (dd,  $J = 2.3, 1.1$  Hz, 1H), 5.98 (ddt,  $J = 16.9, 10.2, 6.5$  Hz, 1H), 5.13 (dq,  $J = 17.1, 1.7$  Hz, 1H), 5.03 (ddt,  $J = 10.2, 2.3, 1.3$  Hz, 1H), 2.91 – 2.83 (m, 2H), 2.54 – 2.47 (m, 5H);  $^{13}\text{C}$  NMR (126 MHz,  $\text{CDCl}_3$ )  $\delta$  138.87, 134.62, 128.34, 127.73, 123.49, 121.32, 118.58, 115.77, 114.60, 110.71, 34.29, 24.75, 21.55; IR (NaCl/thin film) 3413, 2919, 1640, 1423, 1225, 1091, 995, 911, 792  $\text{cm}^{-1}$ ; HRMS (ESI) calc'd for  $\text{C}_{13}\text{H}_{15}\text{N}$   $[\text{M}+\text{H}]^+$  186.1277, found 186.1274.

### 6-methyl-3-(but-3-en-1-yl)indole (S3)

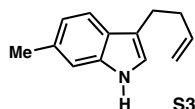

Prepared from 6-methylindole (2.6 g, 19.8 mmol) according to General Procedure A to yield 6-methyl-3-(but-3-en-1-yl)indole (**S3**) in 42% yield (1.54 g).  $^1\text{H}$  NMR (400 MHz,  $\text{CDCl}_3$ )  $\delta$  7.76 (s, 1H), 7.51 (d,  $J = 8.0$  Hz, 1H), 7.15 (s, 1H), 6.97 (dd,  $J = 8.1, 1.4$  Hz, 1H), 6.96 – 6.89 (m, 1H), 5.95 (ddt,  $J = 16.9, 10.2, 6.6$  Hz, 1H), 5.10 (dq,  $J = 17.2, 1.7$  Hz, 1H), 5.01 (ddt,  $J = 10.2, 2.3, 1.3$  Hz, 1H), 2.89 – 2.81 (m, 2H), 2.53 – 2.44 (m, 5H);  $^{13}\text{C}$  NMR (101 MHz,  $\text{CDCl}_3$ )  $\delta$  138.88, 136.77, 131.71, 125.40, 120.92, 120.51, 118.60, 116.13, 114.63, 111.04, 34.34, 24.85, 21.74; IR (NaCl/thin film) 3412, 2918, 2100, 1639, 1455, 1339, 1229, 1089, 995, 910, 800  $\text{cm}^{-1}$ ; HRMS (ESI) calc'd for  $\text{C}_{13}\text{H}_{15}\text{N}$   $[\text{M}+\text{H}]^+$  186.1277, found 186.1277.

### 7-methyl-3-(but-3-en-1-yl)indole (S4)

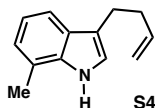

Prepared from 7-methylindole (2.6 g, 19.8 mmol) according to General Procedure A to yield 7-methyl-3-(but-3-en-1-yl)indole (**S4**) in 38% yield (1.39 g).  $^1\text{H}$  NMR (400 MHz,  $\text{CDCl}_3$ )  $\delta$  7.83 (s, 1H), 7.49 (d,  $J = 7.8$ , 1H), 7.10 – 7.04 (m, 1H), 7.04 – 7.00 (m, 2H), 5.96 (ddt,  $J = 16.9, 10.2, 6.6$  Hz, 1H), 5.11 (dq,  $J = 17.1, 1.7$  Hz, 1H), 5.02 (ddt,  $J = 10.2, 2.3, 1.2$  Hz, 1H), 2.91 – 2.85 (m, 2H), 2.55 – 2.45 (m, 5H);  $^{13}\text{C}$  NMR (101 MHz,  $\text{CDCl}_3$ )  $\delta$  138.85, 135.89, 127.05, 122.47, 120.90, 120.23, 119.40, 116.81, 116.70, 114.67, 34.35, 24.91, 16.64; IR (NaCl/thin film) 3419, 2919, 1639, 1433, 1342, 1065, 911, 783, 746  $\text{cm}^{-1}$ ; HRMS (ESI) calc'd for  $\text{C}_{13}\text{H}_{15}\text{N}$   $[\text{M}+\text{H}]^+$  186.1277, found 186.1277.

### 5-methoxy-3-(but-3-en-1-yl)indole (S5)

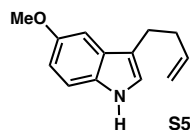

Prepared from 5-methoxyindole (3 g, 20.4 mmol) according to General Procedure A to yield 5-methoxy-3-(but-3-en-1-yl)indole (S5) in 44% yield (1.80 g).  $^1\text{H}$  NMR (400 MHz,  $\text{CDCl}_3$ )  $\delta$  7.83 (s, 1H), 7.25 (d,  $J = 8.5$  Hz, 1H), 7.05 (d,  $J = 2.5$  Hz, 1H), 6.98 (dd,  $J = 2.3, 1.1$  Hz, 1H), 6.86 (dd,  $J = 8.8, 2.5$  Hz, 1H), 5.96 (ddt,  $J = 16.9, 10.2, 6.6$  Hz, 1H), 5.10 (dq,  $J = 17.1, 1.7$  Hz, 1H), 5.01 (ddt,  $J = 10.2, 2.2, 1.2$  Hz, 1H), 3.88 (s, 3H), 2.87 – 2.79 (m, 2H), 2.48 (tdt,  $J = 7.9, 6.5, 1.5$  Hz, 2H);  $^{13}\text{C}$  NMR (101 MHz,  $\text{CDCl}_3$ )  $\delta$  153.83, 138.82, 131.46, 127.89, 122.05, 115.99, 114.70, 112.03, 111.77, 100.84, 55.98, 34.14, 24.76; IR (NaCl/thin film) 3414, 2919, 1584, 1482, 1291, 1213, 1172, 1059, 1028, 914, 794  $\text{cm}^{-1}$ ; HRMS (ESI) calc'd for  $\text{C}_{13}\text{H}_{15}\text{NO}$   $[\text{M}+\text{H}]^+$  202.1226, found 202.1223.

### 5-bromo-3-(but-3-en-1-yl)indole (S6)

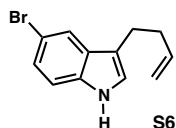

Prepared from 5-bromoindole (4.1 g, 21.1 mmol) according to General Procedure A to yield 5-bromo-3-(but-3-en-1-yl)indole (S6) in 25% yield (1.34 g).  $^1\text{H}$  NMR (500 MHz,  $\text{CDCl}_3$ )  $\delta$  7.94 (s, 1H), 7.73 (d,  $J = 1.8$  Hz, 1H), 7.28 – 7.25 (m, 1H), 7.22 (d,  $J = 8.6$  Hz, 1H), 7.00 (d,  $J = 2.4$  Hz, 1H), 5.91 (ddt,  $J = 16.8, 10.2, 6.6$  Hz, 1H), 5.09 (dq,  $J = 17.1, 1.7$  Hz, 1H), 5.01 (ddt,  $J = 10.2, 2.3, 1.3$  Hz, 1H), 2.85 – 2.78 (m, 2H), 2.46 (tdt,  $J = 7.8, 6.5, 1.5$  Hz, 2H);  $^{13}\text{C}$  NMR (126 MHz,  $\text{CDCl}_3$ )  $\delta$  138.41, 134.86, 129.32, 124.72, 122.43, 121.57, 116.02, 114.94, 112.47, 112.45, 34.13, 24.52; IR (NaCl/thin film) 3429, 2921, 1639, 1458, 1224, 1093, 995, 912, 792  $\text{cm}^{-1}$ ; HRMS (MM) calc'd for  $\text{C}_{12}\text{H}_{12}\text{BrN}$   $[\text{M}+\text{K}]^+$  287.9796, found 287.9786.

### General Procedure B: Preparation of 3-(but-3-en-1-yl) N-substituted indoles

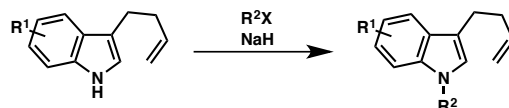

The appropriate 3-(but-3-en-1-yl) N-H indole was dissolved in DMF. NaH (2.0 equiv, 60% dispersion in mineral oil) was added at rt, followed by either methyl iodide or allyl bromide or benzyl bromide (2.5 equiv). The reaction was stirred at room temperature until consumption of starting material of observed by TLC. The reaction was diluted with ethyl acetate, and quenched with water (10× volume of DMF). The aqueous layer was extracted 3× with ethyl acetate. The combined organic layers were washed with water, dried ( $\text{MgSO}_4$ ), filtered, and concentrated under reduced pressure. The crude residue was purified by column chromatography on silica gel.

### 3-(but-3-en-1-yl)-1-methylindole (7a)

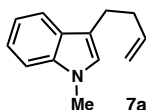

Prepared from 3-(but-3-en-1-yl)-1*H*-indole (1.07 g, 6.2 mmol) according to General Procedure B to yield **7a** in 95% yield (1.09 g). Spectral data of **7a** were found to be in agreement with those reported in the literature.<sup>4</sup>

### 3-(but-3-en-1-yl)-1-allylindole (7b)

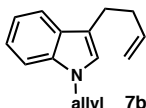

Prepared from 3-(but-3-en-1-yl)-1*H*-indole (400 mg, 2.3 mmol) according to General Procedure B to yield **7b** in 73% yield (355 mg). <sup>1</sup>H NMR (500 MHz, CDCl<sub>3</sub>) δ 7.62 (dt, *J* = 7.9, 1.0 Hz, 1H), 7.30 (dt, *J* = 8.3, 0.9 Hz, 1H), 7.21 (ddd, *J* = 8.2, 6.9, 1.2 Hz, 1H), 7.12 (ddd, *J* = 8.0, 7.0, 1.0 Hz, 1H), 6.90 (s, 1H), 6.04 – 5.91 (m, 2H), 5.20 (dq, *J* = 10.2, 1.5 Hz, 1H), 5.10 (app ddq, *J* = 17.0, 3.0, 1.6 Hz, 2H), 5.01 (ddt, *J* = 10.2, 2.2, 1.2 Hz, 1H), 4.69 (dt, *J* = 5.4, 1.6 Hz, 2H), 2.91 – 2.84 (m, 2H), 2.49 (dtt, *J* = 9.2, 6.5, 1.4 Hz, 2H); <sup>13</sup>C NMR (126 MHz, CDCl<sub>3</sub>) δ 138.82, 136.42, 133.73, 128.11, 125.03, 121.47, 119.09, 118.69, 117.04, 115.14, 114.64, 109.48, 48.63, 34.46, 24.74; IR (NaCl/thin film) 3075, 2917, 2848, 1640, 1466, 1374, 1326, 1190, 990, 738 cm<sup>-1</sup>; HRMS (MM) calc'd for C<sub>15</sub>H<sub>17</sub>N [M+H]<sup>+</sup> 212.1434, found 212.1434.

### 3-(but-3-en-1-yl)-1-benzylindole (7c)

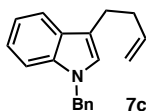

Prepared from 3-(but-3-en-1-yl)-1*H*-indole (1.07 g, 6.2 mmol) according to General Procedure B to yield **7c** in 87% yield (1.42 g). <sup>1</sup>H NMR (400 MHz, CDCl<sub>3</sub>) δ 7.77 (dt, *J* = 7.6, 1.0 Hz, 1H), 7.43 – 7.33 (m, 4H), 7.32 – 7.18 (m, 4H), 7.02 (s, 1H), 6.08 (ddt, *J* = 16.9, 10.2, 6.6 Hz, 1H), 5.35 (s, 2H), 5.23 (dq, *J* = 17.2, 1.7 Hz, 1H), 5.14 (ddt, *J* = 10.2, 2.3, 1.3 Hz, 1H), 3.07 – 2.95 (m, 2H), 2.66 – 2.58 (m, 2H); <sup>13</sup>C NMR (101 MHz, CDCl<sub>3</sub>) δ 138.69, 137.77, 136.60, 128.61, 128.11, 127.39, 126.64, 125.40, 121.59, 119.05, 118.77, 115.31, 114.64, 109.54, 49.69, 34.37, 24.68; IR (NaCl/thin film) 3435, 3061, 2920, 1466, 1356, 1327, 1177, 1014, 911, 798, 738 cm<sup>-1</sup>; HRMS (MM) calc'd for C<sub>19</sub>H<sub>19</sub>N [M\*]<sup>+</sup> 261.1512, found 261.1509.

#### 4-methyl-3-(but-3-en-1-yl)-1-benzylindole (7d)

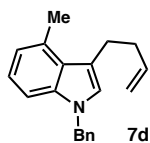

Prepared from 4-methyl-3-(but-3-en-1-yl)indole (**S1**) (871 mg, 5.2 mmol) according to General Procedure B to yield **7d** in 90% yield (1.31 g).  $^1\text{H}$  NMR (500 MHz,  $\text{CDCl}_3$ )  $\delta$  7.31 – 7.23 (m, 3H), 7.16 – 7.05 (m, 4H), 6.88 (s, 1H), 6.83 (dt,  $J = 6.9, 0.9$  Hz, 1H), 5.96 (ddt,  $J = 16.9, 10.2, 6.6$  Hz, 1H), 5.26 (s, 2H), 5.10 (dq,  $J = 17.1, 1.6$  Hz, 1H), 5.02 (ddt,  $J = 10.2, 2.2, 1.3$  Hz, 1H), 3.08 – 3.00 (m, 2H), 2.74 (s, 3H), 2.51 – 2.42 (m, 2H);  $^{13}\text{C}$  NMR (126 MHz,  $\text{CDCl}_3$ )  $\delta$  138.62, 137.81, 137.04, 131.15, 128.68, 127.43, 126.68, 126.57, 125.67, 121.64, 120.66, 116.30, 114.72, 107.52, 49.83, 35.61, 26.76, 20.31; IR (NaCl/thin film) 2918, 1496, 1453, 910, 742  $\text{cm}^{-1}$ ; HRMS (MM) calc'd for  $\text{C}_{20}\text{H}_{21}\text{N}$   $[\text{M}+\text{H}]^+$  276.1747, found 276.1759.

#### 5-methyl-3-(but-3-en-1-yl)-1-benzylindole (7e)

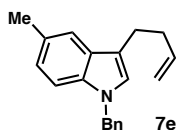

Prepared from 5-methyl-3-(but-3-en-1-yl)indole (**S2**) (963 mg, 5.2 mmol) according to General Procedure B to yield **7e** in 95% yield (1.37 g):  $^1\text{H}$  NMR (500 MHz,  $\text{CDCl}_3$ )  $\delta$  7.41 (dt,  $J = 1.7, 0.8$  Hz, 1H), 7.31 – 7.23 (m, 3H), 7.14 (d,  $J = 8.3$  Hz, 1H), 7.11 – 7.08 (m,  $J = 7.2, 1.4, 0.7$  Hz, 2H), 7.00 (dd,  $J = 8.3, 1.6$  Hz, 1H), 6.89 (s, 1H), 5.95 (ddt,  $J = 16.9, 10.2, 6.6$  Hz, 1H), 5.26 (s, 2H), 5.14 – 5.05 (m, 1H), 5.00 (ddt,  $J = 10.2, 2.3, 1.2$  Hz, 1H), 2.89 – 2.81 (m, 2H), 2.51 – 2.45 (m, 5H);  $^{13}\text{C}$  NMR (126 MHz,  $\text{CDCl}_3$ )  $\delta$  138.85, 138.01, 135.07, 128.67, 128.36, 128.02, 127.41, 126.66, 125.62, 123.21, 118.79, 114.83, 114.60, 109.32, 49.86, 34.45, 24.74, 21.50; IR (NaCl/thin film) 3434, 2916, 1639, 1487, 1453, 910, 787  $\text{cm}^{-1}$ ; HRMS (MM) calc'd for  $\text{C}_{20}\text{H}_{21}\text{N}$   $[\text{M}^*]^+$  275.1669, found 275.1665.

#### 6-methyl-3-(but-3-en-1-yl)-1-benzylindole (7f)

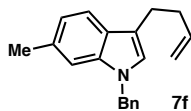

Prepared from 6-methyl-3-(but-3-en-1-yl)indole (**S3**) (963 mg, 5.2 mmol) according to General Procedure B to yield **7f** in 90% yield (1.29 g).  $^1\text{H}$  NMR (500 MHz,  $\text{CDCl}_3$ )  $\delta$  7.52 (d,  $J = 8.0$  Hz, 1H), 7.33 – 7.24 (m, 3H), 7.13 – 7.09 (m, 2H), 7.06 (s, 1H), 6.96 (dd,  $J = 8.1, 1.4$  Hz, 1H), 6.85 (s, 1H), 5.94 (ddt,  $J = 16.8, 10.2, 6.6$  Hz, 1H), 5.26 (s, 2H), 5.09 (dq,  $J = 17.1, 1.7$  Hz, 1H), 5.00 (ddt,  $J = 10.2, 2.3, 1.2$  Hz, 1H), 2.93 – 2.87 (m, 2H), 2.51 – 2.45 (m, 5H);  $^{13}\text{C}$  NMR (126 MHz,  $\text{CDCl}_3$ )  $\delta$  138.84, 138.03, 137.11, 131.46, 128.69, 127.40, 126.66, 126.02, 124.84,



120.60, 118.80, 115.31, 114.61, 109.50, 49.61, 34.48, 24.83, 21.90; IR (NaCl/thin film) 2916, 1622, 1468, 1452, 1325, 1174, 1028, 910, 798  $\text{cm}^{-1}$ ; HRMS (MM) calc'd for  $\text{C}_{20}\text{H}_{21}\text{N}$   $[\text{M}+\text{H}]^+$  276.1747, found 276.1755.

#### 7-methyl-3-(but-3-en-1-yl)-1-benzylindole (7g)

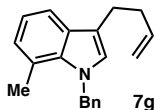

Prepared from 7-methyl-3-(but-3-en-1-yl)indole (**S4**) (963 mg, 5.2 mmol) according to General Procedure B to yield **7g** in 92% yield (1.31 g).  $^1\text{H}$  NMR (400 MHz,  $\text{CDCl}_3$ )  $\delta$  7.49 (d,  $J = 8.0$  Hz, 1H), 7.31 – 7.20 (m, 3H), 7.02 (dd,  $J = 7.9, 7.1$  Hz, 1H), 6.94 – 6.87 (m, 3H), 6.87 (s, 1H), 5.95 (ddt,  $J = 16.9, 10.2, 6.6$  Hz, 1H), 5.54 (s, 2H), 5.09 (dq,  $J = 17.1, 1.7$  Hz, 1H), 5.00 (ddt,  $J = 10.2, 2.3, 1.2$  Hz, 1H), 2.90 – 2.83 (m, 2H), 2.54 – 2.45 (m, 5H);  $^{13}\text{C}$  NMR (101 MHz,  $\text{CDCl}_3$ )  $\delta$  139.98, 138.81, 135.37, 129.18, 128.78, 127.46, 127.20, 125.43, 124.55, 121.07, 119.17, 117.13, 115.38, 114.69, 51.97, 34.32, 24.64, 19.56; IR (NaCl/thin film) 3434, 1639, 1495, 1451, 1414, 1366, 1325, 1173, 1077, 911, 781, 743  $\text{cm}^{-1}$ ; HRMS (MM) calc'd for  $\text{C}_{20}\text{H}_{21}\text{N}$   $[\text{M}+\text{OH}]^+$  292.1696, found 292.1694.

#### 5-methoxy-3-(but-3-en-1-yl)-1-benzylindole (7h)

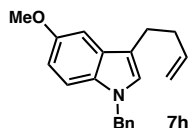

Prepared from 5-methoxy-3-(but-3-en-1-yl)indole (**S5**) (1.8 g, 8.9 mmol) according to General Procedure B to yield **7h** in 73% yield (1.90 g).  $^1\text{H}$  NMR (500 MHz,  $\text{CDCl}_3$ )  $\delta$  7.31 – 7.22 (m, 3H), 7.12 (d,  $J = 8.8$  Hz, 1H), 7.10 – 7.07 (m, 2H), 7.05 (d,  $J = 2.3$  Hz, 1H), 6.91 (s, 1H), 6.82 (ddd,  $J = 8.8, 2.5, 0.4$  Hz, 1H), 5.95 (ddt,  $J = 16.9, 10.2, 6.6$  Hz, 1H), 5.25 (s, 2H), 5.09 (ddt,  $J = 17.1, 2.1, 1.6$  Hz, 1H), 5.00 (ddt,  $J = 10.2, 2.0, 1.2$  Hz, 1H), 3.87 (s, 3H), 2.87 – 2.80 (m, 2H), 2.48 (dt,  $J = 9.2, 6.5, 1.4$  Hz, 2H);  $^{13}\text{C}$  NMR (126 MHz,  $\text{CDCl}_3$ )  $\delta$  153.67, 138.79, 137.92, 131.96, 128.69, 128.44, 127.46, 126.65, 126.20, 114.83, 114.68, 111.71, 110.39, 101.02, 55.95, 50.04, 34.28, 24.73; IR (NaCl/thin film) 2917, 1487, 1452, 1228, 1044, 909, 790  $\text{cm}^{-1}$ ; HRMS (MM) calc'd for  $\text{C}_{20}\text{H}_{21}\text{NO}$   $[\text{M}+\text{H}]^+$  292.1696, found 292.1699.

### 5-bromo-3-(but-3-en-1-yl)-1-benzylindole (**7i**)

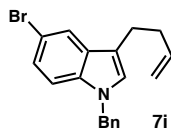

Prepared from 5-bromo-3-(but-3-en-1-yl)indole (**S6**) (1.5 g, 6.0 mmol) according to General Procedure B to yield **7i** in 93% yield (1.9 g).  $^1\text{H}$  NMR (500 MHz,  $\text{CDCl}_3$ )  $\delta$  7.74 (dd,  $J = 2.0, 0.5$  Hz, 1H), 7.32 – 7.26 (m, 3H), 7.23 (dd,  $J = 8.7, 1.9$  Hz, 1H), 7.10 (dd,  $J = 8.7, 0.5$  Hz, 1H), 7.08 – 7.05 (m, 2H), 6.93 (s, 1H), 5.91 (ddt,  $J = 16.9, 10.2, 6.6$  Hz, 1H), 5.25 (s, 2H), 5.08 (dq,  $J = 17.1, 1.6$  Hz, 1H), 5.01 (ddt,  $J = 10.2, 2.2, 1.2$  Hz, 1H), 2.85 – 2.79 (m, 2H), 2.46 (dt,  $J = 9.2, 6.5, 1.4$  Hz, 2H);  $^{13}\text{C}$  NMR (126 MHz,  $\text{CDCl}_3$ )  $\delta$  138.40, 137.33, 135.27, 129.90, 128.79, 127.68, 126.75, 126.61, 124.43, 121.73, 115.06, 114.95, 112.25, 111.13, 50.04, 34.30, 24.52; IR (NaCl/thin film) 3429, 2920, 1639, 1470, 1453, 1355, 1175, 1053, 912, 789, 732  $\text{cm}^{-1}$ ; HRMS (ESI) calc'd for  $\text{C}_{19}\text{H}_{18}\text{BrN}$   $[\text{M}+\text{OH}]^+$  356.0645, found 356.0640.

### General Procedure C: Preparation of *N-H* indole substrates

*N-H* indoles were prepared according to either the method of Jørgensen and co-workers<sup>5</sup> or a Fisher indole synthesis protocol. For the Fisher indole synthesis, the appropriate phenylhydrazine (1.0 equiv) and aldehyde (1.0 equiv) were refluxed in THF along with HCl (1.96 equiv) for 24 hr. Upon cooling to rt, the reaction mixture was diluted with water. The organic phase was separated and the aqueous phase was extracted with EtOAc twice. The organic layer was washed with water and brine, dried over  $\text{MgSO}_4$ , and concentrated in vacuo. The residue was purified by column chromatography on silica gel.

### 5-chloro-3-methyl-1*H*-indole

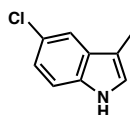

Prepared from 2-bromo-4-chloroaniline (3.7 g, 18 mmol) according to the method of Jørgensen and co-workers to yield **5-chloro-3-methyl-1*H*-indole** in 29% yield (345 mg). **5-chloro-3-methyl-1*H*-indole**'s spectral properties were found to be in agreement with those reported in the literature.<sup>6</sup>

### 5-fluoro-3-methyl-1*H*-indole

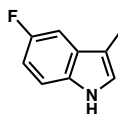

Prepared from 4-fluorophenylhydrazine hydrochloride (1.5 g, 9.2 mmol) and propionaldehyde (538 mg, 9.2 mmol) according to the Fischer indole synthesis protocol to yield **5-fluoro-3-methyl-1*H*-indole** in 18% yield (245

mg). **5-fluoro-3-methyl-1H-indole**'s spectral properties were found to be in agreement with those reported in the literature.

### 5-methoxy-3-methyl-1H-indole

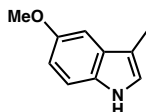

Prepared from 4-methoxyphenylhydrazine hydrochloride (1.2 g, 6.9 mmol) and propionaldehyde (400 mg, 6.9 mmol) according to the Fischer indole synthesis protocol to yield **5-methoxy-3-methyl-1H-indole** in 40% yield (450 mg). **5-methoxy-3-methyl-1H-indole**'s spectral properties were found to be in agreement with those reported in the literature.<sup>7</sup>

### 3-butyl-1H-indole

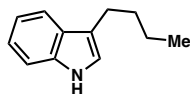

Prepared from phenylhydrazine (3.2 g, 30 mmol) and hexanal (3.0 g, 30 mmol) according to the Fischer indole synthesis protocol to yield **3-butyl-1H-indole** in 85% yield (4.4 g). **3-butyl-1H-indole**'s spectral properties were found to be in agreement with those reported in the literature.<sup>8</sup>

### 3-phenethyl-1H-indole

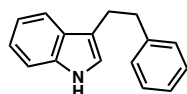

Prepared from phenylhydrazine (550 mg, 5.1 mmol) and 4-phenylbutanal (755 mg, 5.1 mmol) according to the Fischer indole synthesis protocol to yield **3-phenethyl-1H-indole** in 75% yield (845 mg). **3-phenethyl-1H-indole**'s spectral properties were found to be in agreement with those reported in the literature.<sup>9</sup>

### General Procedure D: Preparation of *N*-(but-3-en-1-yl) indole substrates

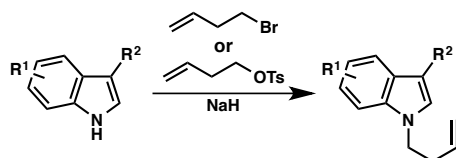

The indole was dissolved in DMF. NaH (1.2 equiv, 60% dispersion in mineral oil) was added at rt, followed by either 4-bromo-1-butene or *O*-tosyl-but-3-en-1-ol (1.2 equiv). The reaction was stirred at room temperature for 24 h. The reaction was quenched with a 1:1 mixture of water and a saturated sodium bicarbonate solution (10×

volume of DMF). The aqueous layer was extracted 3× with ethyl acetate. The combined organic layers were washed with water, dried (MgSO<sub>4</sub>), filtered, and concentrated under reduced pressure. The crude residue was purified by column chromatography on silica gel.

### 1-(but-3-en-1-yl)-3-methylindole (9a)

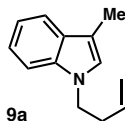

Prepared from 3-methylindole (500 mg, 3.8 mmol) according to General Procedure D to yield **9a** in 20% yield (141 mg). **9a**'s spectral properties were found to be in agreement with those reported in the literature.<sup>10</sup>

### 1-(but-3-en-1-yl)-5-chloro-3-methylindole (9b)

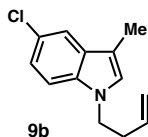

Prepared from 5-chloro-3-methylindole (345 mg, 2.1 mmol) according to General Procedure D to yield **9b** in 36% yield (289 mg). <sup>1</sup>H NMR (400 MHz, CDCl<sub>3</sub>) δ 7.51 (d, *J* = 1.9 Hz, 1H), 7.20 (d, *J* = 8.7 Hz, 1H), 7.13 (dd, *J* = 8.7, 2.0 Hz, 1H), 6.88 (s, 1H), 5.75 (ddt, *J* = 17.1, 10.2, 6.8 Hz, 1H), 5.07 (dtd, *J* = 17.1, 1.5, 0.5 Hz, 1H), 5.05 (dtd, *J* = 10.2, 1.7, 0.9 Hz, 1H), 4.09 (t, *J* = 7.2 Hz, 2H), 2.53 (q, *J* = 7.0 Hz, 2H), 2.27 (s, 2H); <sup>13</sup>C NMR (101 MHz, CDCl<sub>3</sub>) δ 134.60, 134.55, 129.78, 126.68, 124.37, 121.55, 118.55, 117.44, 110.15, 109.98, 45.90, 34.64, 9.48; IR (NaCl/thin film) 3431, 1641, 1471, 1354, 916, 834, 783 cm<sup>-1</sup>; HRMS (ESI) calc'd for C<sub>13</sub>H<sub>14</sub>ClN [M+H]<sup>+</sup> 220.0888, found 220.0890.

### 1-(but-3-en-1-yl)-5-fluoro-3-methylindole (9c)

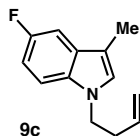

Prepared from 5-fluoro-3-methylindole according (245 mg, 1.6 mmol) to General Procedure D to yield **9c** in 85% yield (283 mg). <sup>1</sup>H NMR (400 MHz, CDCl<sub>3</sub>) δ 7.23 – 7.16 (m, 1H), 6.93 (td, *J* = 9.2, 2.6 Hz, 1H), 6.90 (s, 1H), 5.77 (ddt, *J* = 17.1, 10.2, 6.8 Hz, 1H), 5.08 (dq, *J* = 17.1, 1.5 Hz, 1H), 5.05 (m, 1H), 4.10 (t, *J* = 7.2 Hz, 2H), 2.59 – 2.48 (m, 2H), 2.27 (d, *J* = 1.1 Hz, 3H); <sup>13</sup>C NMR (101 MHz, CDCl<sub>3</sub>) δ, 157.48 (d, *J* = 233.7 Hz), 134.65, 132.81, 128.95 (d, *J* = 9.5 Hz), 126.99, 117.34, 110.14 (d, *J* = 4.8 Hz), 109.73, 109.55 (d, *J* = 16.9 Hz), 103.84 (d, *J* = 22.9 Hz), 45.98, 34.67, 9.55; IR (NaCl/thin film) 3434, 2924, 1488, 1457, 1358, 1199, 906, 850, 785, 619 cm<sup>-1</sup>; HRMS (MM) calc'd for C<sub>13</sub>H<sub>14</sub>FN [M+H]<sup>+</sup> 204.1183, found 204.1189.

### 1-(but-3-en-1-yl)-5-methoxy-3-methylindole (9d)

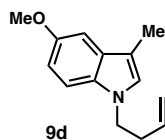

Prepared from 5-methoxy-3-methylindole (450 mg, 2.8 mmol) according to General Procedure D to yield **9d** in 48% yield (290 mg).  $^1\text{H}$  NMR (400 MHz,  $\text{CDCl}_3$ )  $\delta$  7.19 (d,  $J = 8.8$  Hz, 1H), 7.00 (d,  $J = 2.2$  Hz, 1H), 6.88 (dd,  $J = 2.5$  Hz, 8.9 Hz, 1H), 6.85 (s, 1H), 5.78 (ddt,  $J = 17.1, 10.2, 6.8$  Hz, 1H), 5.12 – 5.02 (m, 2H), 4.08 (t,  $J = 7.2$  Hz, 2H), 3.88 (s, 3H), 2.58 – 2.50 (m, 2H), 2.29 (d,  $J = 1.0$  Hz, 3H);  $^{13}\text{C}$  NMR (101 MHz,  $\text{CDCl}_3$ )  $\delta$  153.57, 134.89, 131.54, 128.95, 126.03, 117.14, 111.56, 109.91, 109.64, 100.87, 55.99, 45.92, 34.77, 9.66; IR (NaCl/thin film) 3421, 2090, 1640, 1490, 1226, 783  $\text{cm}^{-1}$ ; HRMS (MM) calc'd for  $\text{C}_{14}\text{H}_{17}\text{NO}$   $[\text{M}+\text{H}]^+$  216.1383, found 216.1386.

### 1-(but-3-en-1-yl)-3-butylindole (9e)

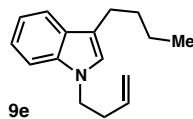

Prepared from 3-butylindole (4.4 g, 25.4 mmol) according to General Procedure D to yield **9e** in 29% yield (1.68 g).  $^1\text{H}$  NMR (400 MHz,  $\text{CDCl}_3$ )  $\delta$  7.63 (dt,  $J = 7.9, 1.0$  Hz, 1H), 7.33 (dt,  $J = 8.2, 1.0$  Hz, 1H), 7.23 (ddd,  $J = 8.2, 7.0, 1.2$  Hz, 1H), 7.12 (ddd,  $J = 7.9, 6.9, 1.0$  Hz, 1H), 6.89 (s, 1H), 5.82 (ddt,  $J = 17.1, 10.2, 6.8$  Hz, 1H), 5.15 – 5.06 (m, 2H), 4.15 (t,  $J = 7.3$  Hz, 1H), 2.82 – 2.73 (m, 2H), 2.59 (tdd,  $J = 8.2, 6.2, 1.3$  Hz, 2H), 1.77 – 1.67 (m, 2H), 1.50 – 1.39 (m, 2H), 0.98 (t,  $J = 7.3$  Hz, 3H);  $^{13}\text{C}$  NMR (101 MHz,  $\text{CDCl}_3$ )  $\delta$  136.27, 134.92, 128.19, 124.84, 121.28, 119.22, 118.45, 117.19, 115.72, 109.22, 45.79, 34.70, 32.56, 24.82, 22.71, 14.06; IR (NaCl/thin film) 3431, 2954, 2927, 1641, 1467, 1373, 1181, 917, 736  $\text{cm}^{-1}$ ; HRMS (MM) calc'd for  $\text{C}_{16}\text{H}_{21}\text{N}$   $[\text{M}^*]^+$  227.1669, found 227.1664.

### 1-(but-3-en-1-yl)-3-phenethylindole (9f)

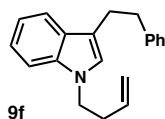

Prepared from 3-phenethylindole (845 mg, 3.8 mmol) according to General Procedure D to yield **9f** in 43% yield (446 mg).  $^1\text{H}$  NMR (400 MHz,  $\text{CDCl}_3$ )  $\delta$  7.61 (dt,  $J = 7.9, 1.0$  Hz, 1H), 7.33 – 7.26 (m, 3H), 7.24 – 7.18 (m, 4H), 7.11 (ddd,  $J = 8.0, 7.0, 1.0$  Hz, 1H), 6.81 (s, 1H), 5.76 (ddt,  $J = 17.1, 10.2, 6.8$  Hz, 1H), 5.12 – 5.02 (m, 2H), 4.12 (t,  $J = 7.2$  Hz, 1H), 3.09 – 2.98 (m, 4H), 2.59 – 2.48 (m, 2H);  $^{13}\text{C}$  NMR (101 MHz,  $\text{CDCl}_3$ )  $\delta$  142.46, 136.22, 134.83, 128.51, 128.27, 127.95, 125.79, 125.10, 121.39, 119.04, 118.62, 117.21, 114.69, 109.30, 45.80, 36.69,

34.64, 27.27; IR (NaCl/thin film) 3430, 2102, 1641, 1467, 918, 737, 699  $\text{cm}^{-1}$ ; HRMS (MM) calc'd for  $\text{C}_{20}\text{H}_{21}\text{N}$   
[M+H]<sup>+</sup> 276.1747, found 276.1747.

## Aza-Prins Cascades

### General Procedure E. Conjugate Addition/Asymmetric Protonation/Prins Cyclization Cascade

To a flame-dried flask was added indole (0.20 mmol, 1.00 equiv), acrylate (0.24 mmol, 1.20 equiv), and (*R*)-3,3'-dibromo-BINOL (0.04 mmol, 0.20 equiv), and 2,6-dibromophenol (0.20 mmol, 1.00 equiv). The flask was charged with DCM (1.5 mL), followed by addition of TMSCl (0.2 mmol, 1.00 equiv), ZrCl<sub>4</sub> (0.32 mmol, 1.60 equiv unless specifically indicated), then stirred at room temperature for 24 h. The reaction was quenched by diluting with 1 mL MeCN and 1 mL 1 M HCl, followed by addition of 5 mL H<sub>2</sub>O. The aqueous layer was extracted with ethyl acetate (3 x 5 mL) and the combined organic layers were washed with either saturated NaHCO<sub>3(aq)</sub> (10 mL). The aqueous layer was back extracted with EtOAc (10 mL) and the combined organic layers were dried (Na<sub>2</sub>SO<sub>4</sub>), filtered, and concentrated. The crude residue was purified by flash chromatography.

### Indoline Products from Conjugate Addition/Asymmetric Protonation/Prins Cyclization Cascade

#### Indoline 8a

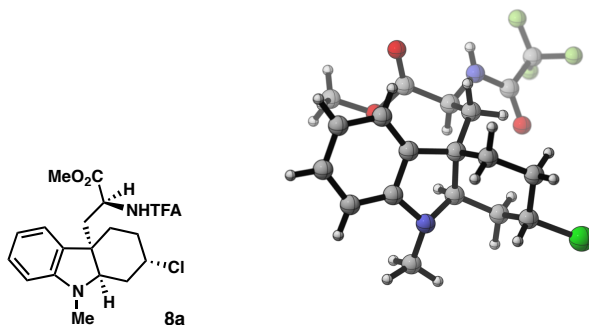

Prepared from 1-methyl-3-(but-3-en-1-yl)-indole (**7a**) (37 mg, 0.2 mmol) and methyl 2-trifluoroacetamidoacrylate (**2a**) (47 mg, 0.24 mmol) using General Procedure C to yield a mixture of **8a** and **8a'** in 84% yield (70 mg). The diastereomeric ratio was determined to be 7:1 by <sup>1</sup>H NMR analysis of the crude reaction mixture. The enantiomeric excess of the major diastereomer was determined to be 87% by chiral SFC analysis (AD-H, 2.5 mL/min, 7% IPA in CO<sub>2</sub>, λ = 254 nm): *t*<sub>R</sub>(major) = 4.9 min; *t*<sub>R</sub>(minor) = 6.0 min. The major diastereomer was separated by flash chromatography (10% ethyl acetate/hexanes). <sup>1</sup>H NMR (500 MHz, CDCl<sub>3</sub>) δ 7.14 (td, *J* = 7.7, 1.3 Hz, 1H), 6.95 (dd, *J* = 7.3, 0.8 Hz, 1H), 6.82 (d, *J* = 7.8 Hz, 1H), 6.75 (td, *J* = 7.4, 0.9 Hz, 1H), 6.54 (d, *J* = 7.8 Hz, 1H), 4.55 (td, *J* = 7.6, 5.8 Hz, 1H), 4.28 – 4.21 (m, 1H), 3.50 (s, 3H), 3.45 (t, *J* = 5.1 Hz, 1H), 2.72 (s, 3H), 2.41 (dd, *J* = 14.9, 7.4 Hz, 1H), 2.24 (dd, *J* = 14.9, 5.7 Hz, 1H), 2.13 – 1.99 (m, 2H), 1.91 – 1.76 (m, 4H); <sup>13</sup>C NMR (126 MHz, CDCl<sub>3</sub>) δ 171.3, 156.5 (q, *J*<sub>C-F</sub> = 37.7 Hz), 150.9, 133.0, 128.5, 121.7, 118.8, 115.5 (q, *J*<sub>C-F</sub> = 287.6 Hz), 108.8, 68.7, 55.8, 52.6, 50.2, 44.5, 37.8, 32.9, 32.8, 32.0, 31.0; IR (NaCl/thin film) 3312, 2954, 2864, 1711, 1607, 1482, 1209, 1178 cm<sup>-1</sup>; [α]<sub>D</sub><sup>25</sup> = +55.6 (*c* = 2.06, CH<sub>2</sub>Cl<sub>2</sub>). HRMS (MM) calc'd for C<sub>19</sub>H<sub>22</sub>ClF<sub>3</sub>N<sub>2</sub>O<sub>3</sub> [M+H]<sup>+</sup> 419.1344, found 419.1358.

## Indoline 8b

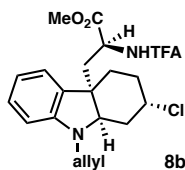

Prepared from 1-allyl-3-(but-3-en-1-yl)indole (**7b**) (42 mg, 0.2 mmol) and methyl 2-trifluoroacetamidoacrylate (**2a**) (47 mg, 0.24 mmol) using General Procedure C to yield a mixture of **8b** and **8b'** in 70% yield (62 mg). The diastereomeric ratio was determined to be 4:1 by  $^1\text{H}$  NMR analysis of the crude reaction mixture. The enantiomeric excess of the major diastereomer was determined to be 89% by chiral SFC analysis (OD-H, 2.5 mL/min, 7% IPA in  $\text{CO}_2$ ,  $\lambda = 254$  nm):  $t_{\text{R}}$ (minor) = 5.0 min;  $t_{\text{R}}$ (major) = 8.0 min. The major diastereomer was separated by recrystallization (10% ethyl acetate/hexanes).  $^1\text{H}$  NMR (500 MHz,  $\text{CDCl}_3$ )  $\delta$  7.11 (td,  $J = 7.7, 1.3$  Hz, 1H), 6.94 (dd,  $J = 7.3, 0.8$  Hz, 1H), 6.73 (td,  $J = 7.4, 0.9$  Hz, 1H), 6.60 (d,  $J = 7.7$  Hz, 1H), 6.57 (d,  $J = 7.8$  Hz, 1H), 5.87 (dddd,  $J = 17.2, 10.2, 7.0, 4.8$  Hz, 1H), 5.31 (ddd,  $J = 17.2, 3.1, 1.6$  Hz, 1H), 5.25 (ddd,  $J = 10.2, 2.8, 1.4$  Hz, 1H), 4.62 (dd,  $J = 13.8, 7.5$  Hz, 1H), 4.23 (qd,  $J = 7.6, 3.7$  Hz, 1H), 3.91 (ddt,  $J = 15.9, 4.8, 1.6$  Hz, 1H), 3.68 (t,  $J = 4.9$  Hz, 1H), 3.64 – 3.56 (m, 1H), 3.47 (s,  $J = 2.1$  Hz, 3H), 2.41 (dd,  $J = 14.8, 7.3$  Hz, 1H), 2.27 (dd,  $J = 14.8, 6.0$  Hz, 1H), 2.11 (dt,  $J = 13.5, 4.1$  Hz, 1H), 2.03 – 1.94 (m, 1H), 1.93 – 1.73 (m, 4H);  $^{13}\text{C}$  NMR (126 MHz,  $\text{CDCl}_3$ )  $\delta$  171.4, 156.4 (q,  $J_{\text{C-F}} = 37.8$  Hz), 149.6, 133.2, 133.0, 128.4, 121.8, 118.6, 117.9, 115.4 (q,  $J_{\text{C-F}} = 288.0$  Hz), 109.0, 65.8, 55.7, 52.6, 50.1, 48.2, 44.4, 37.33, 32.9, 32.2, 31.0; IR (NaCl/thin film) 3310, 2951, 1711, 1606, 1553, 1479, 1462, 1441, 1209, 1174  $\text{cm}^{-1}$ ;  $[\alpha]_{\text{D}}^{25} = +78.1$  ( $c = 1.39$ ,  $\text{CH}_2\text{Cl}_2$ ). HRMS (MM) calc'd for  $\text{C}_{21}\text{H}_{23}\text{ClF}_3\text{N}_2\text{O}_3$   $[\text{M}+\text{H}]^+$  445.1500, found 445.1496.

## Indoline 8c

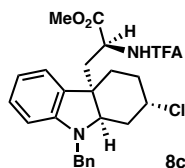

Prepared from 1-benzyl-3-(but-3-en-1-yl)indole (**7c**) (52 mg, 0.2 mmol) and methyl 2-trifluoroacetamidoacrylate (**2a**) (47 mg, 0.24 mmol) using General Procedure C to yield a mixture of **8c** and **8c'** in 82% yield (81 mg). The diastereomeric ratio was determined to be 5:1 by  $^1\text{H}$  NMR analysis of the crude reaction mixture. The enantiomeric excess of the major diastereomer was determined to be 86% by chiral SFC analysis (AD-H, 2.5 mL/min, 10% MeOH in  $\text{CO}_2$ ,  $\lambda = 254$  nm):  $t_{\text{R}}$ (major) = 2.5 min;  $t_{\text{R}}$ (minor) = 4.6 min.  $^1\text{H}$  NMR (500 MHz,  $\text{CDCl}_3$ )  $\delta$  7.39 – 7.28 (m, 5H), 7.07 (td,  $J = 7.7, 1.2$  Hz, 1H), 6.96 (dd,  $J = 7.3, 0.9$  Hz, 1H), 6.73 (td,  $J = 7.4, 0.8$  Hz, 1H), 6.57 (d,  $J = 7.9$  Hz, 1H), 6.50 (d,  $J = 7.8$  Hz, 1H), 4.64 (dd,  $J = 13.6, 7.5$  Hz, 1H), 4.42 (d,  $J = 15.6$  Hz, 1H), 4.22 (tt,  $J = 7.4, 3.5$  Hz, 1H), 4.16 (d,  $J = 15.5$  Hz, 1H), 3.63 (t,  $J = 5.1$  Hz, 1H), 3.45 (s,  $J = 2.5$  Hz, 3H), 2.44 (dd,  $J =$



14.8, 7.3 Hz, 1H), 2.29 (dd,  $J = 14.8, 5.8$  Hz, 1H), 2.15 – 2.07 (m, 1H), 2.04 – 1.78 (m, 5H);  $^{13}\text{C}$  NMR (126 MHz,  $\text{CDCl}_3$ )  $\delta$  171.4, 156.5 (q,  $J_{\text{C-F}} = 37.8$  Hz), 150.1, 137.9, 132.9, 128.7, 128.7, 127.5, 127.4, 121.9, 118.6, 115.4 (q,  $J_{\text{C-F}} = 287.9$  Hz) 109.0, 66.6, 55.9, 52.7, 50.2, 50.0, 44.5, 37.2, 33.0, 31.6, 30.9; IR (NaCl/thin film) 3309, 2952, 1717, 1605, 1495, 1479, 1210, 1174, 753  $\text{cm}^{-1}$ ;  $[\alpha]_{\text{D}}^{25} = +65.1$  ( $c = 1.70, \text{CH}_2\text{Cl}_2$ ). HRMS (MM) calc'd for  $\text{C}_{25}\text{H}_{26}\text{ClF}_3\text{N}_2\text{O}_3$   $[\text{M}+\text{H}]^+$  495.1657, found 495.1648.

### Indoline 8d

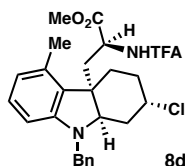

Prepared from 1-benzyl-3-(but-3-en-1-yl)-4-methylindole (**7d**) (55 mg, 0.2 mmol) and methyl 2-trifluoroacetamidoacrylate (**2a**) (47 mg, 0.24 mmol) using General Procedure C to yield a mixture of **8d** and **8d'** in 90% yield (91 mg). The diastereomeric ratio was determined to be 4:1 by  $^1\text{H}$  NMR analysis of the crude reaction mixture. The enantiomeric excess of the major diastereomer was determined to be 88% by chiral SFC analysis (OD-H, 2.5 mL/min, 10% EtOH in  $\text{CO}_2$ ,  $\lambda = 254$  nm):  $t_{\text{R}}(\text{minor}) = 6.7$  min;  $t_{\text{R}}(\text{major}) = 7.5$  min. The major diastereomer was separated by flash chromatography (5  $\rightarrow$  10% ethyl acetate/hexanes).  $^1\text{H}$  NMR (400 MHz,  $\text{CDCl}_3$ )  $\delta$  7.39 – 7.27 (m, 5H), 6.96 (t,  $J = 7.7$  Hz, 1H), 6.67 (d,  $J = 7.6$  Hz, 1H), 6.48 (d,  $J = 7.6$  Hz, 1H), 6.37 (d,  $J = 7.9$  Hz, 1H), 4.64 (q,  $J = 7.0$  Hz, 1H), 4.40 (d,  $J = 15.8$  Hz, 1H), 4.21 – 4.12 (m, 2H), 3.60 (t,  $J = 4.3$  Hz, 1H), 3.38 (s, 3H), 2.51 (dd,  $J = 15.0, 6.6$  Hz, 1H), 2.40 (dd,  $J = 15.0, 7.0$  Hz, 1H), 2.29 (s, 3H), 2.21 (dt,  $J = 14.6, 4.3$  Hz, 1H), 2.03 – 1.88 (m, 4H), 1.88 – 1.75 (m, 1H);  $^{13}\text{C}$  NMR (101 MHz,  $\text{CDCl}_3$ )  $\delta$  171.3, 156.5 (q,  $J_{\text{C-F}} = 37.8$  Hz), 150.9, 138.0, 133.9, 129.7, 128.7 ( $\times 2$ ), 128.3, 127.4 ( $\times 2$ ), 127.3, 122.2, 115.4 (q,  $J_{\text{C-F}} = 287.9$  Hz), 107.0, 65.8, 55.5, 52.6, 50.6, 50.4, 46.2, 36.6, 33.1, 31.3, 31.1, 19.1; IR (NaCl/thin film) 3311, 2953, 1711, 1589, 1452, 1212, 1177  $\text{cm}^{-1}$ ;  $[\alpha]_{\text{D}}^{25} = +79.4$  ( $c = 0.81, \text{CH}_2\text{Cl}_2$ ). HRMS (MM) calc'd for  $\text{C}_{26}\text{H}_{28}\text{ClF}_3\text{N}_2\text{O}_3$   $[\text{M}+\text{H}]^+$  509.1813, found 509.1806.

### Indoline 8e

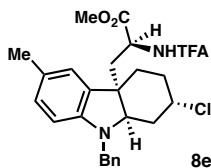

Prepared from 1-benzyl-3-(but-3-en-1-yl)-5-methylindole (**7e**) (55 mg, 0.2 mmol) and methyl 2-trifluoroacetamidoacrylate (**2a**) (47 mg, 0.24 mmol) using General Procedure C to yield a mixture of **8e** and **8e'** in quantitative yield (102 mg). The diastereomeric ratio was determined to be 6:1 by  $^1\text{H}$  NMR analysis of the crude reaction mixture. The enantiomeric excess of the major diastereomer was determined to be 92% by chiral SFC

analysis (OJ-H, 2.5 mL/min, 8% EtOH in CO<sub>2</sub>, λ = 254 nm); *t<sub>R</sub>*(minor) = 5.1 min; *t<sub>R</sub>*(major) = 7.0 min. The major diastereomer was separated by flash chromatography. <sup>1</sup>H NMR (500 MHz, CDCl<sub>3</sub>) δ .39 – 7.27 (m, 5H), 6.87 (ddd, *J* = 7.9, 1.7, 0.7 Hz, 1H), 6.78 (d, *J* = 1.7 Hz, 1H), 6.50 (d, *J* = 7.7 Hz, 1H), 6.39 (d, *J* = 7.9 Hz, 1H), 4.62 (td, *J* = 7.6, 5.5 Hz, 1H), 4.37 (d, *J* = 15.4 Hz, 1H), 4.24 (dt, *J* = 11.3, 3.7 Hz, 1H), 4.10 (d, *J* = 15.4 Hz, 1H), 3.56 (t, *J* = 5.2 Hz, 1H), 3.49 (s, *J* = 2.3 Hz, 3H), 2.44 (dd, *J* = 14.8, 7.5 Hz, 1H), 2.30 – 2.21 (m, 4H), 2.09 – 1.78 (m, 6H); <sup>13</sup>C NMR (126 MHz, CDCl<sub>3</sub>) δ 171.4, 156.4 (q, *J*<sub>C-F</sub> = 37.8 Hz), 147.9, 138.0, 133.0, 128.7, 128.6 (×2), 128.0, 127.5 (×2), 127.3, 122.8, 116.6 (q, *J*<sub>C-F</sub> = 287.8 Hz), 109.0, 66.9, 56.1, 52.6, 50.4, 50.1, 44.6, 37.3, 32.8, 31.1, 30.8, 20.7; IR (NaCl/thin film) 3314, 2951, 2868, 1715, 1552, 1490, 1440, 1210, 1177 cm<sup>-1</sup>; [α]<sub>D</sub><sup>25</sup> = +55.3 (*c* = 0.85, CH<sub>2</sub>Cl<sub>2</sub>). HRMS (MM) calc'd for C<sub>26</sub>H<sub>28</sub>ClF<sub>3</sub>N<sub>2</sub>O<sub>3</sub> [M+H]<sup>+</sup> 509.1813, found 509.1831.

### Indoline 8f

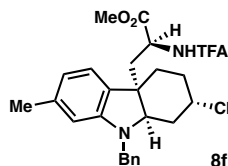

Prepared from 1-benzyl-3-(but-3-en-1-yl)-6-methylindole (**7f**) (55 mg, 0.2 mmol) and methyl 2-trifluoroacetamidoacrylate (**2a**) (47 mg, 0.24 mmol) using General Procedure C (but with 1.1 equiv ZrCl<sub>4</sub>) to yield a mixture of **8f** and **8f'** in 74% yield (75 mg). The diastereomeric ratio was determined to be 3:1 by <sup>1</sup>H NMR analysis of the crude reaction mixture. The enantiomeric excess of the major diastereomer was determined to be 93% by chiral SFC analysis (AD-H, 2.5 mL/min, 20% IPA in CO<sub>2</sub>, λ = 254 nm): *t<sub>R</sub>*(minor) = 1.9 min; *t<sub>R</sub>*(major) = 2.6 min. The major diastereomer was separated by flash chromatography (5→10% ethyl acetate/hexanes). <sup>1</sup>H NMR (500 MHz, CDCl<sub>3</sub>) δ 7.39 – 7.27 (m, 5H), 6.84 (d, *J* = 7.4 Hz, 1H), 6.54 (d, *J* = 7.4 Hz, 1H), 6.49 (d, *J* = 7.7 Hz, 1H), 6.33 (s, 1H), 4.60 (td, *J* = 7.7, 5.4 Hz, 1H), 4.38 (d, *J* = 15.6 Hz, 1H), 4.21 (dq, *J* = 11.0, 3.7 Hz, 1H), 4.13 (d, *J* = 15.6 Hz, 1H), 3.58 (t, *J* = 5.3 Hz, 1H), 3.49 (s, *J* = 2.4 Hz, 3H), 2.39 (dd, *J* = 14.8, 7.6 Hz, 1H), 2.27 – 2.21 (m, 4H), 2.06 – 1.77 (m, 6H); <sup>13</sup>C NMR (126 MHz, CDCl<sub>3</sub>) δ 171.4, 156.5 (q, *J*<sub>C-F</sub> = 37.8 Hz), 150.3, 138.6, 138.0, 129.9, 128.7 (×2), 127.4 (×2), 127.3, 121.8, 119.2, 115.4 (q, *J*<sub>C-F</sub> = 287.8 Hz), 109.8, 66.7, 56.0, 52.7, 50.1, 50.0, 44.37, 37.6, 33.0, 31.0, 30.8, 21.7; IR (NaCl/thin film) 3312, 2950, 1712, 1612, 1551, 1493, 1452, 1210, 1176 cm<sup>-1</sup>; [α]<sub>D</sub><sup>25</sup> = +65.8 (*c* = 0.89, CH<sub>2</sub>Cl<sub>2</sub>). HRMS (MM) calc'd for C<sub>26</sub>H<sub>28</sub>ClF<sub>3</sub>N<sub>2</sub>O<sub>3</sub> [M+H]<sup>+</sup> 509.1813, found 509.1823.

## Indoline 8g

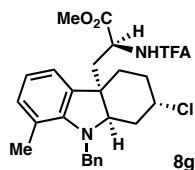

Prepared from 1-benzyl-3-(but-3-en-1-yl)-7-methylindole (**7g**) (55 mg, 0.2 mmol) and methyl 2-trifluoroacetamidoacrylate (**2a**) (47 mg, 0.24 mmol) using General Procedure C to yield a mixture of **8g** and **8g'** in 89% yield (90 mg). The diastereomeric ratio was determined to be 6:1 by <sup>1</sup>H NMR analysis of the crude reaction mixture. The enantiomeric excess of the major diastereomer was determined to be 89% by chiral SFC analysis (AD-H, 2.5 mL/min, 20% IPA in CO<sub>2</sub>, λ = 254 nm): *t*<sub>R</sub>(minor) = 1.8 min; *t*<sub>R</sub>(major) = 2.5 min. The major diastereomer was separated by flash chromatography (5→10% ethyl acetate/hexanes). <sup>1</sup>H NMR (400 MHz, CDCl<sub>3</sub>) δ 7.39 – 7.27 (m, 5H), 6.91 (d, *J* = 7.5 Hz, 1H), 6.82 (d, *J* = 7.3 Hz, 1H), 6.70 (t, *J* = 7.4 Hz, 1H), 6.46 (d, *J* = 7.8 Hz, 1H), 4.71 (d, *J* = 16.5 Hz, 1H), 4.62 – 4.49 (m, 2H), 4.19 (td, *J* = 7.9, 3.8 Hz, 1H), 3.51 (s, 3H), 3.45 (t, *J* = 4.9 Hz, 1H), 2.35 (s, 3H), 2.24 (d, *J* = 6.3 Hz, 2H), 2.04 (dt, *J* = 15.0, 4.4 Hz, 1H), 1.96 – 1.69 (m, 5H); <sup>13</sup>C NMR (101 MHz, CDCl<sub>3</sub>) δ 171.4, 156.4 (q, *J*<sub>C-F</sub> = 37.7 Hz), 148.0, 139.3, 133.7, 132.3, 128.7 (×2), 127.3, 127.2 (×2), 120.4, 120.0, 119.3, 115.4 (q, *J*<sub>C-F</sub> = 287.8 Hz), 66.4, 55.9, 52.7, 52.3, 50.0, 44.6, 37.9, 33.9, 32.0, 30.8, 19.6; IR (NaCl/thin film) 3314, 2952, 1715, 1558, 1452, 1208, 1176 cm<sup>-1</sup>; [α]<sub>D</sub><sup>25</sup> = +57.2 (*c* = 0.94, CH<sub>2</sub>Cl<sub>2</sub>). HRMS (MM) calc'd for C<sub>26</sub>H<sub>28</sub>ClF<sub>3</sub>N<sub>2</sub>O<sub>3</sub> [M-H]<sup>-</sup> 507.1668, found 507.1681.

## Indoline 8h

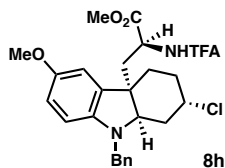

Prepared from 1-benzyl-3-(but-3-en-1-yl)-5-methoxyindole (**7h**) (58 mg, 0.2 mmol) and methyl 2-trifluoroacetamidoacrylate (**2a**) (47 mg, 0.24 mmol) using General Procedure C (but with 1.1 equiv ZrCl<sub>4</sub>) to yield a mixture of **8h** and **8h'** in 93% yield (97 mg). The diastereomeric ratio was determined to be 6:1 by <sup>1</sup>H NMR analysis of the crude reaction mixture. The enantiomeric excess of the major diastereomer was determined to be 91% by chiral SFC analysis (AD-H, 2.5 mL/min, 12% IPA in CO<sub>2</sub>, λ = 254 nm): *t*<sub>R</sub>(minor) = 4.2 min; *t*<sub>R</sub>(major) = 4.9 min. The major diastereomer was separated by flash chromatography (15→20% ethyl acetate/hexanes). <sup>1</sup>H NMR (400 MHz, CDCl<sub>3</sub>) δ 7.41 – 7.27 (m, 5H), 6.63 – 6.57 (m, 2H), 6.53 (d, *J* = 7.7 Hz, 1H), 6.39 (d, *J* = 8.0 Hz, 1H), 4.60 (dd, *J* = 13.8, 6.8 Hz, 1H), 4.34 (d, *J* = 15.4 Hz, 1H), 4.23 (dd, *J* = 9.8, 6.4 Hz, 1H), 4.07 (d, *J* = 15.4 Hz, 1H), 3.72 (s, 3H), 3.55 (t, *J* = 4.6 Hz, 1H), 3.47 (s, 3H), 2.44 (dd, *J* = 14.9, 7.0 Hz, 1H), 2.28 (dd, *J* = 14.9, 5.8 Hz, 1H), 2.16 – 2.09 (m, 1H), 1.99 – 1.72 (m, 5H); <sup>13</sup>C NMR (101 MHz, CDCl<sub>3</sub>) δ 171.3, 156.4 (q, *J*<sub>C-F</sub> = 37.7 Hz), 153.4, 144.2, 138.0, 134.7, 128.6 (×2), 127.5 (×2), 127.3, 115.4 (q, *J*<sub>C-F</sub> = 288.0), 112.7, 109.8, 109.2, 67.0,

55.8, 52.7, 51.2, 50.1, 44.7, 36.9, 33.0, 32.3, 31.1, 29.7; IR (NaCl/thin film) 3315, 2925, 1716, 1555, 1490, 1215, 1176  $\text{cm}^{-1}$ ;  $[\alpha]_{\text{D}}^{25} = +40.4$  ( $c = 0.96$ ,  $\text{CH}_2\text{Cl}_2$ ). HRMS (MM) calc'd for  $\text{C}_{26}\text{H}_{28}\text{ClF}_3\text{N}_2\text{O}_4$   $[\text{M}+\text{H}]^+$  525.1762, found 525.1749.

### Indoline 8i

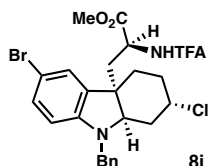

Prepared from 1-benzyl-3-(but-3-en-1-yl)-5-bromoindole (**8i**) (68 mg, 0.2 mmol) and methyl 2-trifluoroacetamidoacrylate (**2a**) (47 mg, 0.24 mmol) using General Procedure C to yield a mixture of **8i** and **8i'** in 70% yield (80 mg). The diastereomeric ratio was determined to be 5:1 by  $^1\text{H}$  NMR analysis of the crude reaction mixture. The enantiomeric excess of the major diastereomer was determined to be 85% by chiral SFC analysis (OD-H, 2.5 mL/min, 10% EtOH in  $\text{CO}_2$ ,  $\lambda = 254$  nm):  $t_{\text{R}}(\text{minor}) = 7.7$  min;  $t_{\text{R}}(\text{major}) = 9.5$  min.  $^1\text{H}$  NMR (500 MHz,  $\text{CDCl}_3$ )  $\delta$  7.38 – 7.28 (m, 5H), 7.15 (dd,  $J = 8.3, 2.0$  Hz, 1H), 7.03 (d,  $J = 2.0$  Hz, 1H), 6.68 (d,  $J = 8.1$  Hz, 1H), 6.36 (d,  $J = 8.4$  Hz, 1H), 4.62 (dd,  $J = 14.6, 6.6$  Hz, 1H), 4.38 (d,  $J = 15.6$  Hz, 1H), 4.22 – 4.09 (m, 2H), 3.66 (t,  $J = 4.8$  Hz, 1H), 3.49 (s, 3H), 2.38 (dd,  $J = 14.9, 6.8$  Hz, 1H), 2.28 (dd,  $J = 14.9, 6.2$  Hz, 1H), 2.01 – 1.75 (m, 5H);  $^{13}\text{C}$  NMR (126 MHz,  $\text{CDCl}_3$ )  $\delta$  171.2, 156.5 (q,  $J_{\text{C-F}} = 38.1$  Hz), 149.3, 137.3, 135.5, 131.0, 128.8 ( $\times 2$ ), 127.5, 127.4 ( $\times 2$ ), 125.0, 115.4 (q,  $J_{\text{C-F}} = 287.9$  Hz), 110.4, 110.2, 66.6, 60.4, 55.3, 52.8, 50.2, 49.9, 44.7, 37.1, 33.0, 32.1, 30.9. IR (NaCl/thin film) 3308, 2951, 2864, 1713, 1475, 1210, 1175  $\text{cm}^{-1}$ ;  $[\alpha]_{\text{D}}^{25} = +41.4$  ( $c = 0.90$ ,  $\text{CH}_2\text{Cl}_2$ ). HRMS (MM) calc'd for  $\text{C}_{25}\text{H}_{25}\text{BrClF}_3\text{N}_2\text{O}_3$   $[\text{M}+\text{H}]^+$  573.0762, found 573.0745.

### Indoline 10a

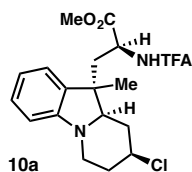

Prepared from 1-(but-3-en-1-yl)-3-methylindole (**9a**) (37 mg) and methyl 2-trifluoroacetamidoacrylate (**2a**) (47 mg, 0.24 mmol) using General Procedure C to yield a mixture of **10a** and **10a'** in 93% yield (70 mg). The diastereomeric ratio was determined to be 4:1 by  $^1\text{H}$  NMR analysis of the crude reaction mixture. The enantiomeric excess of the major diastereomer was determined to be 86% by chiral SFC analysis (OD-H, 2.5 mL/min, 8% EtOH in  $\text{CO}_2$ ,  $\lambda = 254$  nm):  $t_{\text{R}}(\text{minor}) = 5.3$  min;  $t_{\text{R}}(\text{major}) = 6.0$  min. The major diastereomer was separated by flash chromatography (12  $\rightarrow$  15% ethyl acetate/hexanes).  $^1\text{H}$  NMR (500 MHz,  $\text{CDCl}_3$ )  $\delta$  7.12 (td,  $J = 7.7, 1.2$  Hz, 1H), 6.99 (dd,  $J = 7.7, 1.3$  Hz, 1H), 6.89 (d,  $J = 7.9$  Hz, 1H), 6.74 (td,  $J = 7.4, 0.9$  Hz, 1H), 6.50 (d,  $J = 7.7, 1.2$  Hz, 1H), 6.36 (d,  $J = 8.4$  Hz, 1H), 4.62 (dd,  $J = 14.6, 6.6$  Hz, 1H), 4.38 (d,  $J = 15.6$  Hz, 1H), 4.22 – 4.09 (m, 2H), 3.66 (t,  $J = 4.8$  Hz, 1H), 3.49 (s, 3H), 2.38 (dd,  $J = 14.9, 6.8$  Hz, 1H), 2.28 (dd,  $J = 14.9, 6.2$  Hz, 1H), 2.01 – 1.75 (m, 5H);  $^{13}\text{C}$  NMR (126 MHz,  $\text{CDCl}_3$ )  $\delta$  171.2, 156.5 (q,  $J_{\text{C-F}} = 38.1$  Hz), 149.3, 137.3, 135.5, 131.0, 128.8 ( $\times 2$ ), 127.5, 127.4 ( $\times 2$ ), 125.0, 115.4 (q,  $J_{\text{C-F}} = 287.9$  Hz), 110.4, 110.2, 66.6, 60.4, 55.3, 52.8, 50.2, 49.9, 44.7, 37.1, 33.0, 32.1, 30.9. IR (NaCl/thin film) 3308, 2951, 2864, 1713, 1475, 1210, 1175  $\text{cm}^{-1}$ ;  $[\alpha]_{\text{D}}^{25} = +41.4$  ( $c = 0.90$ ,  $\text{CH}_2\text{Cl}_2$ ). HRMS (MM) calc'd for  $\text{C}_{25}\text{H}_{25}\text{BrClF}_3\text{N}_2\text{O}_3$   $[\text{M}+\text{H}]^+$  573.0762, found 573.0745.

= 7.9 Hz, 1H), 4.58 (td,  $J = 7.8, 4.6$  Hz, 1H), 3.98 (tt,  $J = 11.8, 4.0$  Hz, 1H), 3.72 (ddd,  $J = 13.3, 4.7, 2.1$  Hz, 1H), 3.59 (s,  $J = 3.5$  Hz, 3H), 3.16 (dd,  $J = 11.8, 2.7$  Hz, 1H), 2.82 (tt,  $J = 18.4, 9.2$  Hz, 1H), 2.30 (dd,  $J = 14.9, 4.7$  Hz, 1H), 2.21 – 2.07 (m, 3H), 1.89 – 1.77 (m, 1H), 1.72 (q,  $J = 11.9$  Hz, 1H), 1.22 (s, 3H);  $^{13}\text{C}$  NMR (126 MHz,  $\text{CDCl}_3$ )  $\delta$  171.3, 156.6 (q,  $J_{\text{C-F}} = 37.7$  Hz), 148.8, 134.4, 128.5, 122.7, 118.8, 115.5 (q,  $J_{\text{C-F}} = 287.7$  Hz), 107.3, 70.1, 57.1, 52.7, 50.3, 45.7, 43.9, 40.4, 35.9, 34.6, 21.0; IR (NaCl/thin film) 3314, 2958, 1711, 1606, 1482, 1454, 1211, 1173  $\text{cm}^{-1}$ ;  $[\alpha]_{\text{D}}^{25} = +42.0$  ( $c = 4.3$ ,  $\text{CH}_2\text{Cl}_2$ ). HRMS (MM) calc'd for  $\text{C}_{19}\text{H}_{22}\text{ClF}_3\text{N}_2\text{O}_3$   $[\text{M}+\text{H}]^+$  419.1344, found 419.1342.

### Indoline 10b

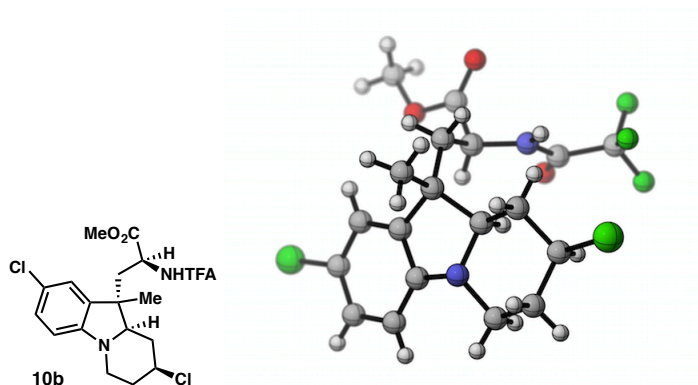

Prepared from 1-(but-3-en-1-yl)-5-chloro-3-methylindole (**9b**) (44 mg) and methyl 2-trifluoroacetamidoacrylate (**2a**) (47 mg, 0.24 mmol) using General Procedure C to yield a mixture of **10b** and **10b'** in 56% yield (51 mg). The diastereomeric ratio was determined to be 4:1 by  $^1\text{H}$  NMR analysis of the crude reaction mixture. The enantiomeric excess of the major diastereomer was determined to be 87% by chiral SFC analysis (AD-H, 2.5 mL/min, 7% IPA in  $\text{CO}_2$ ,  $\lambda = 254$  nm):  $t_{\text{R}}(\text{major}) = 10.3$  min;  $t_{\text{R}}(\text{minor}) = 13.4$  min.  $^1\text{H}$  NMR (500 MHz,  $\text{CDCl}_3$ )  $\delta$  7.11 (dd,  $J = 8.3, 2.1$  Hz, 1H), 6.96 (d,  $J = 2.1$  Hz, 1H), 6.71 (d,  $J = 8.2$  Hz, 1H), 6.44 (d,  $J = 8.3$  Hz, 1H), 4.64 (td,  $J = 7.6, 5.1$  Hz, 1H), 4.00 (tt,  $J = 11.8, 4.0$  Hz, 1H), 3.71 (ddd,  $J = 13.2, 4.7, 2.2$  Hz, 1H), 3.65 (s, 3H), 3.24 (dd,  $J = 11.8, 2.7$  Hz, 1H), 2.86 (td,  $J = 12.9, 2.9$  Hz, 1H), 2.35 (dd,  $J = 14.9, 5.2$  Hz, 1H), 2.21 (ddq,  $J = 12.4, 4.2, 2.2$  Hz, 1H), 2.13 (ddq,  $J = 12.2, 4.4, 2.1$  Hz, 1H), 2.10 (dd,  $J = 15.0, 7.2$  Hz, 1H), 1.87 (qd,  $J = 12.5, 4.7$  Hz, 1H), 1.75 (q,  $J = 11.9$  Hz, 1H), 1.24 (s, 3H);  $^{13}\text{C}$  NMR (126 MHz,  $\text{CDCl}_3$ )  $\delta$  171.11, 156.42 (q,  $J_{\text{C-F}} = 37.9$  Hz), 147.47, 136.39, 128.22, 123.41, 123.11, 115.45 (q,  $J_{\text{C-F}} = 287.8$  Hz), 108.09, 69.82, 56.71, 52.92, 50.03, 45.78, 43.96, 40.64, 35.80, 34.48, 21.12; IR (NaCl/thin film) 3403, 2360, 1714, 1646, 1481, 1212, 1171, 811, 726  $\text{cm}^{-1}$ ;  $[\alpha]_{\text{D}}^{25} = +22.9$  ( $c = 0.14$ ,  $\text{CH}_2\text{Cl}_2$ ). HRMS (ESI) calc'd for  $\text{C}_{19}\text{H}_{21}\text{Cl}_2\text{F}_3\text{N}_2\text{O}_3$   $[\text{M}+\text{Cl}]^-$  487.0575, found 487.0594.

### Indoline 10c

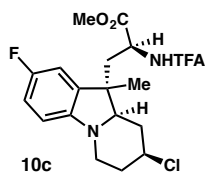

Prepared from 1-(but-3-en-1-yl)-5-fluoro-3-methylindole (**9c**) (40 mg) and methyl 2-trifluoroacetamidoacrylate (**2a**) (47 mg, 0.24 mmol) using General Procedure C to yield a mixture of **10c** and **10c'** in 82% yield (71 mg). The diastereomeric ratio was determined to be 4:1 by  $^1\text{H}$  NMR analysis of the crude reaction mixture. The enantiomeric excess of the major diastereomer was determined to be 84% by chiral SFC analysis (AD-H, 2.5 mL/min, 7% IPA in  $\text{CO}_2$ ,  $\lambda = 254$  nm):  $t_{\text{R}}(\text{major}) = 6.2$  min;  $t_{\text{R}}(\text{minor}) = 7.5$  min.  $^1\text{H}$  NMR (400 MHz,  $\text{CDCl}_3$ )  $\delta$  6.81 (td,  $J = 8.9, 2.6$  Hz, 1H), 6.71 (dd,  $J = 8.2, 2.6$  Hz, 2H), 6.38 (dd,  $J = 8.5, 4.1$  Hz, 1H), 4.58 (td,  $J = 7.8, 4.9$  Hz, 1H), 3.94 (tt,  $J = 11.8, 4.1$  Hz, 1H), 3.65 (ddd,  $J = 4.7, 2.2, 13.2$  Hz, 1H), 3.62 (s, 3H), 3.13 (dd,  $J = 11.8, 2.7$  Hz, 1H), 2.78 (td,  $J = 12.9, 2.8$  Hz, 1H), 2.31 (dd,  $J = 15.0, 5.0$  Hz, 1H), 2.19 – 2.12 (m, 1H), 2.07 (dd,  $J = 14.3, 6.7$  Hz, 1H), 2.04–2.10 (m, 1H), 1.84 (qd,  $J = 12.5, 4.7$  Hz, 1H), 1.72 (q,  $J = 11.9$  Hz, 1H), 1.18 (s, 3H);  $^{13}\text{C}$  NMR (101 MHz,  $\text{CDCl}_3$ )  $\delta$  171.17, 156.98 (d,  $J_{\text{C-F}} = 237.1$  Hz), 156.45 (q,  $J_{\text{C-F}} = 37.8$  Hz), 145.03, 136.24, 116.90 (q,  $J_{\text{C-F}} = 288.86$  Hz), 114.36 (d,  $J_{\text{C-F}} = 23.1$  Hz), 110.52 (d,  $J_{\text{C-F}} = 24.4$  Hz), 107.61 (d,  $J_{\text{C-F}} = 8.3$  Hz), 70.19, 56.87, 52.89, 50.10, 45.81, 44.39, 40.30, 35.74, 34.49, 21.16. IR (NaCl/thin film) 3412, 2095, 1708, 1643, 1486, 1212, 1171, 859, 808, 730  $\text{cm}^{-1}$ ;  $[\alpha]_{\text{D}}^{25} = +43.3$  ( $c = 0.53$ ,  $\text{CH}_2\text{Cl}_2$ ). HRMS (MM) calc'd for  $\text{C}_{19}\text{H}_{21}\text{ClF}_4\text{N}_2\text{O}_3$  [ $\text{M}^*$ ] $^+$  436.1171, found 436.1187.

### Indoline 10d

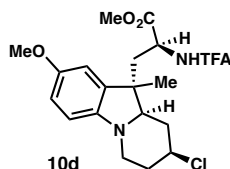

Prepared from 1-(but-3-en-1-yl)-5-methoxy-3-methylindole (**9d**) (43 mg) and methyl 2-trifluoroacetamidoacrylate (**2a**) (47 mg, 0.24 mmol) using General Procedure C to yield a mixture of **10d** and **10d'** in 80% yield (72 mg). The diastereomeric ratio was determined to be 3:1 by  $^1\text{H}$  NMR analysis of the crude reaction mixture. The enantiomeric excess of the major diastereomer was determined to be 81% by chiral SFC analysis (OD-H, 2.5 mL/min, 4% IPA in  $\text{CO}_2$ ,  $\lambda = 254$  nm):  $t_{\text{R}}(\text{minor}) = 22.4$  min;  $t_{\text{R}}(\text{major}) = 24.2$  min.  $^1\text{H}$  NMR (400 MHz,  $\text{CDCl}_3$ )  $\delta$  6.80 (d,  $J = 7.9$  Hz, 1H), 6.67 (dd,  $J = 8.4, 2.6$  Hz, 1H), 6.62 (d,  $J = 2.5$  Hz, 1H), 6.41 (d,  $J = 8.4$  Hz, 1H), 4.51 (td,  $J = 7.7, 4.7$  Hz, 1H), 3.94 (tt,  $J = 11.9, 4.1$  Hz, 1H), 3.74 (s, 3H), 3.65 (ddd,  $J = 13.3, 4.9, 2.5$  Hz, 1H), 3.61 (s, 3H), 3.08 (dd,  $J = 11.7, 2.7$  Hz, 1H), 2.77 (td,  $J = 12.9, 2.8$  Hz, 1H), 2.29 (dd,  $J = 15.0, 4.8$  Hz, 1H), 2.16 – 2.01 (m, 3H), 1.84 (qd,  $J = 12.5, 4.6$  Hz, 1H), 1.71 (q,  $J = 11.9$  Hz, 1H), 1.19 (s, 3H);  $^{13}\text{C}$  NMR (101 MHz,  $\text{CDCl}_3$ )  $\delta$

171.22, 156.45 (q,  $J_{C-F} = 37.7$  Hz), 153.61, 142.80, 135.94, 116.91 (q,  $J_{C-F} = 287.8$  Hz), 112.82, 110.15, 107.93, 70.45, 57.19, 55.85, 52.80, 50.36, 45.89, 44.56, 40.35, 35.71, 34.36, 21.13. IR (NaCl/thin film) 3429, 2100, 1644, 1486, 1212, 1182, 730  $\text{cm}^{-1}$ ;  $[\alpha]_D^{25} = 57.4$  ( $c = 0.54$ ,  $\text{CH}_2\text{Cl}_2$ ). HRMS (MM) calc'd for  $\text{C}_{20}\text{H}_{24}\text{ClF}_3\text{N}_2\text{O}_4$   $[\text{M}+\text{H}]^+$  449.1449, found 449.1451.

### Indoline 10e

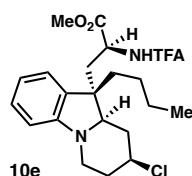

Prepared from 1-(but-3-en-1-yl)-3-butylindole (**9e**) (45 mg) and methyl 2-trifluoroacetamidoacrylate (**2a**) (47 mg, 0.24 mmol) using General Procedure C to yield a mixture of **10e** and **10e'** in 87% yield (80 mg). The diastereomeric ratio was determined to be 5:1 by  $^1\text{H}$  NMR analysis of the crude reaction mixture. The enantiomeric excess of the major diastereomer was determined to be 90% by chiral SFC analysis (AS-H, 2.5 mL/min, 10% IPA in  $\text{CO}_2$ ,  $\lambda = 254$  nm):  $t_R(\text{major}) = 2.5$  min;  $t_R(\text{minor}) = 3.5$  min.  $^1\text{H}$  NMR (500 MHz,  $\text{CDCl}_3$ )  $\delta$  7.12 (td,  $J = 7.7, 1.2$  Hz, 1H), 6.94 (dd,  $J = 7.2, 1.2$  Hz, 1H), 6.73 (td,  $J = 7.4, 0.9$  Hz, 1H), 6.58 (d,  $J = 8.0$  Hz, 1H), 6.50 (d,  $J = 7.8$  Hz, 1H), 4.53 (td,  $J = 7.8, 4.9$  Hz, 1H), 3.95 (tt,  $J = 11.8, 4.1$  Hz, 1H), 3.70 (ddd,  $J = 12.9, 4.7, 2.2$  Hz, 1H), 3.54 (s, 3H), 3.15 (dd,  $J = 11.8, 2.6$  Hz, 1H), 2.75 (td,  $J = 12.8, 2.8$  Hz, 1H), 2.40 (dd,  $J = 15.0, 4.9$  Hz, 1H), 2.17 (ddq,  $J = 12.9, 4.5, 2.2$  Hz, 1H), 2.10 (dd,  $J = 15.1, 7.7$  Hz, 1H), 1.87 (qd,  $J = 12.5, 4.7$  Hz, 1H), 1.81 (q,  $J = 11.9$  Hz, 2H), 1.76 (td,  $J = 13.0, 3.9$  Hz, 1H), 1.44 – 1.37 (m, 1H), 1.37 – 1.20 (m, 3H), 1.18 – 1.09 (m, 1H), 0.88 (t,  $J = 7.2$  Hz, 3H);  $^{13}\text{C}$  NMR (126 MHz,  $\text{CDCl}_3$ )  $\delta$  171.33, 156.42 (q,  $J_{C-F} = 37.8$  Hz), 149.15, 133.09, 128.48, 123.82, 118.73, 116.58 (q,  $J_{C-F} = 288.54$  Hz), 107.71, 70.74, 57.13, 52.73, 50.15, 48.51, 44.42, 37.15, 35.31, 34.62, 33.17, 26.29, 23.24, 14.01; IR (NaCl/thin film) 3418, 2957, 1713, 1644, 1460, 1210, 1184, 911, 730  $\text{cm}^{-1}$ ;  $[\alpha]_D^{25} = +7.85$  ( $c = 0.20$ ,  $\text{CH}_2\text{Cl}_2$ ). HRMS (MM) calc'd for  $\text{C}_{22}\text{H}_{28}\text{ClF}_3\text{N}_2\text{O}_3$   $[\text{M}+\text{OH}]^+$  477.1762, found 477.1765.

### Indoline 10f

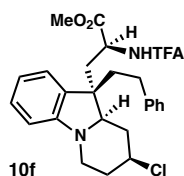

Prepared from 1-(but-3-en-1-yl)-3-phenethylindole (**9a**) (55 mg) and methyl 2-trifluoroacetamidoacrylate (**2a**) (47 mg, 0.24 mmol) using General Procedure C to yield a mixture of **10f** and **10f'** in 83% yield (84 mg). The diastereomeric ratio was determined to be 3:1 by  $^1\text{H}$  NMR analysis of the crude reaction mixture. The

enantiomeric excess of the major diastereomer was determined to be 91% by chiral SFC analysis (OB-H, 2.5 mL/min, 8% IPA in CO<sub>2</sub>,  $\lambda = 254$  nm):  $t_R(\text{minor}) = 7.5$  min;  $t_R(\text{major}) = 10.1$  min. <sup>1</sup>H NMR (500 MHz, CDCl<sub>3</sub>)  $\delta$  7.28 – 7.24 (m, 2H), 7.20 – 7.13 (m, 2H), 7.11 – 7.08 (m, 2H), 7.01 (dd,  $J = 7.7, 0.9$  Hz, 1H), 6.77 (td,  $J = 7.4, 1.0$  Hz, 1H), 6.68 (d,  $J = 8.0$  Hz, 1H), 6.54 (d,  $J = 7.8$  Hz, 1H), 4.62 (td,  $J = 7.6, 5.4$  Hz, 1H), 3.95 (tt,  $J = 11.7, 4.1$  Hz, 1H), 3.72 (ddd,  $J = 12.7, 4.7, 2.2$  Hz, 1H), 3.55 (s, 3H), 3.21 (dd,  $J = 11.8, 2.4$  Hz, 1H), 2.74 (td,  $J = 12.6, 2.7$  Hz, 1H), 2.67 (td,  $J = 13.1, 4.8$  Hz, 1H), 2.57 (dd,  $J = 15.0, 5.4$  Hz, 1H), 2.46 (td,  $J = 13.2, 4.4$  Hz, 1H), 2.20 (m, 2H), 2.17 (dd,  $J = 14.9, 7.2$  Hz, 1H), 2.06 (td,  $J = 13.4, 4.8$  Hz, 1H), 1.90 (qd,  $J = 12.4, 4.6$  Hz, 1H), 1.88 (q, 12.0 Hz, 2H), 1.70 (ddd,  $J = 13.8, 12.7, 4.4$  Hz, 1H); <sup>13</sup>C NMR (126 MHz, CDCl<sub>3</sub>)  $\delta$  171.37, 156.46 (q,  $J_{C-F} = 37.8$  Hz), 149.57, 141.64, 132.30, 128.64, 128.49, 128.20, 126.05, 123.70, 118.81, 115.44 (q,  $J_{C-F} = 287.9$  Hz), 107.79, 70.22, 56.99, 52.81, 50.09, 48.57, 44.57, 36.93, 36.32, 35.34, 34.90, 30.50; IR (NaCl/thin film) 3324, 2925, 2357, 1713, 1605, 1557, 1480, 1456, 1211, 1174, 747, 699 cm<sup>-1</sup>;  $[\alpha]_D^{25} = +5.17$  ( $c = 1.03$ , CH<sub>2</sub>Cl<sub>2</sub>). HRMS (MM) calc'd for C<sub>25</sub>H<sub>28</sub>ClF<sub>3</sub>N<sub>2</sub>O<sub>3</sub> [M+H]<sup>+</sup> 509.1813, found 509.1821.



## Catalyst Optimization

**Table 1.** Reaction optimization: Lewis Acid and chiral diol screen.<sup>[a]</sup>

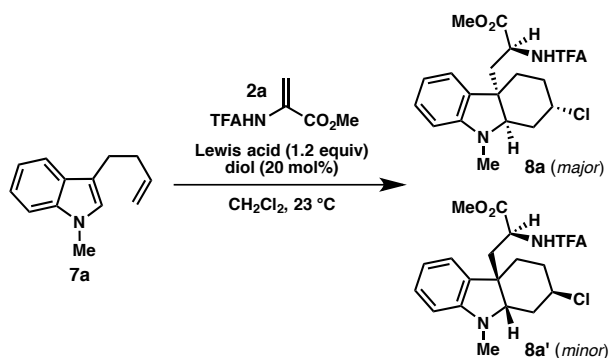

| Entry | Lewis Acid                                | Diol                                               | Yield <b>8</b> (%) <sup>[b]</sup> | dr    | ee <b>8a</b> (%) <sup>[c]</sup> |
|-------|-------------------------------------------|----------------------------------------------------|-----------------------------------|-------|---------------------------------|
| 1     | SnCl <sub>4</sub>                         | ( <i>R</i> )-BINOL ( <b>L1</b> )                   | 19                                | 10:1  | 88                              |
| 2     | TiCl <sub>4</sub>                         | ( <i>R</i> )-BINOL                                 | 27                                | 6:1   | 0                               |
| 3     | SbCl <sub>5</sub>                         | ( <i>R</i> )-BINOL                                 | 0                                 | --    | --                              |
| 4     | ZrCl <sub>4</sub>                         | ( <i>R</i> )-BINOL                                 | 30                                | 9:1   | 40                              |
| 5     | Zr(O <sup><i>t</i></sup> Bu) <sub>4</sub> | ( <i>R</i> )-BINOL                                 | 0                                 | --    | --                              |
| 6     | ZrCl <sub>4</sub>                         | ( <i>R</i> )-6,6'-dibromo-BINOL ( <b>L2</b> )      | 38                                | 9:1   | 30                              |
| 7     | ZrCl <sub>4</sub>                         | ( <i>R</i> )-3,3'-dibromo-BINOL ( <b>L3</b> )      | 40                                | 7:1   | 76                              |
| 8     | ZrCl <sub>4</sub>                         | ( <i>S</i> )-VANOL ( <b>L4</b> )                   | 33                                | 6:1   | 74                              |
| 9     | ZrCl <sub>4</sub>                         | (4 <i>R</i> , 5 <i>R</i> )-Ph-TADDOL ( <b>L5</b> ) | 37                                | >10:1 | 66                              |

[a] Reactions conducted with 0.20 mmol **7a** and 0.24 mmol **2a**. [b] Combined isolated yield of two diastereomers. [c] The ee of the major diastereomer was determined by SFC using a chiral stationary phase.

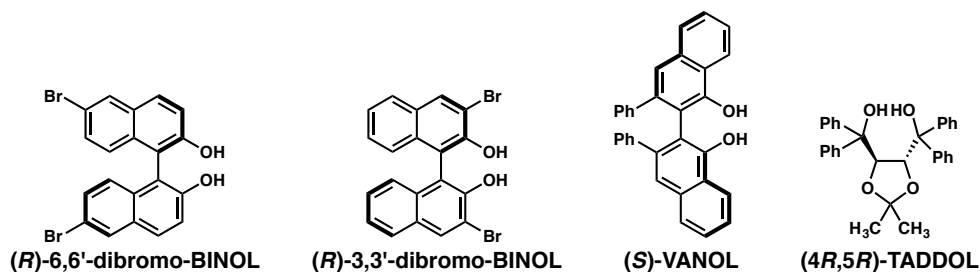

*SFC/HPLC traces of racemic and enantioenriched indolines*

**8a**: racemic

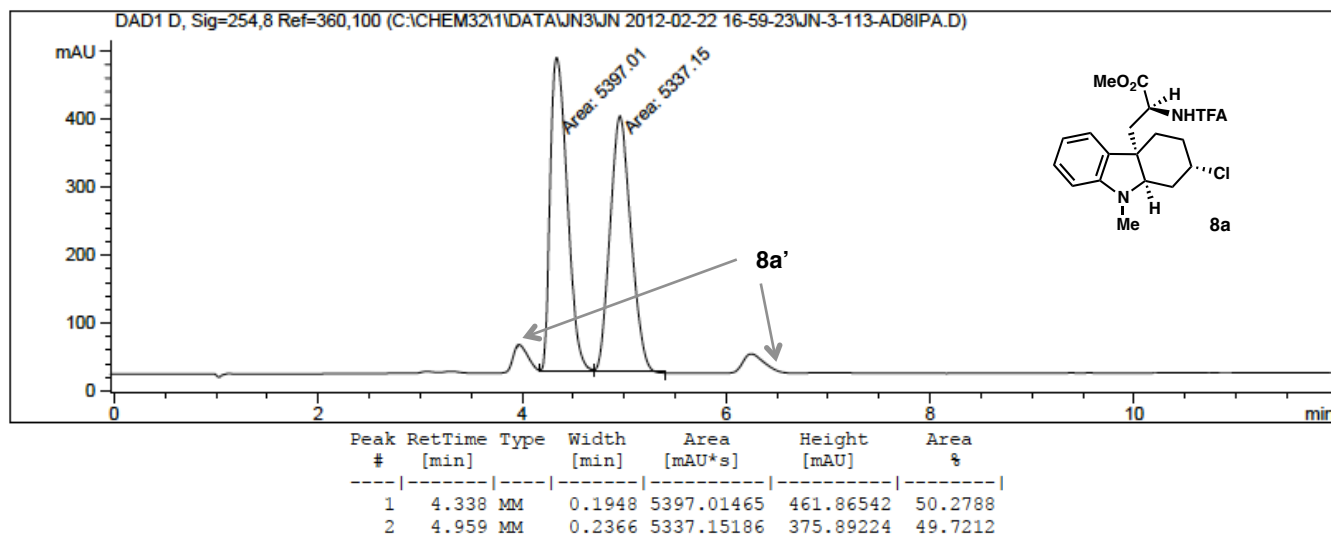

**8a**: 87% ee

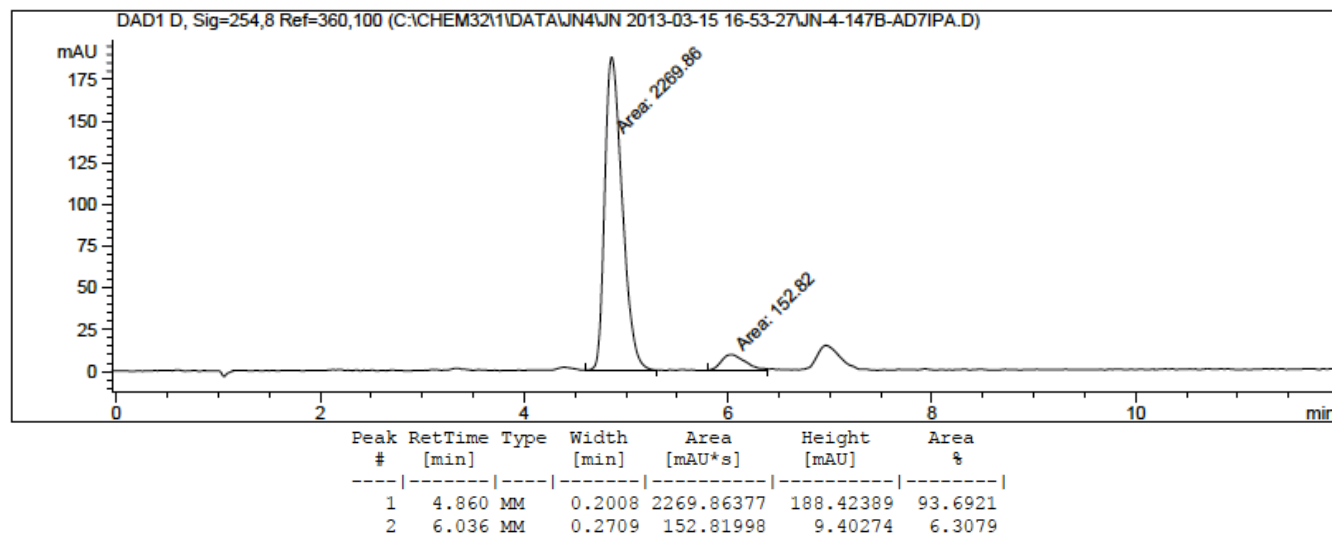

**8b: racemic**

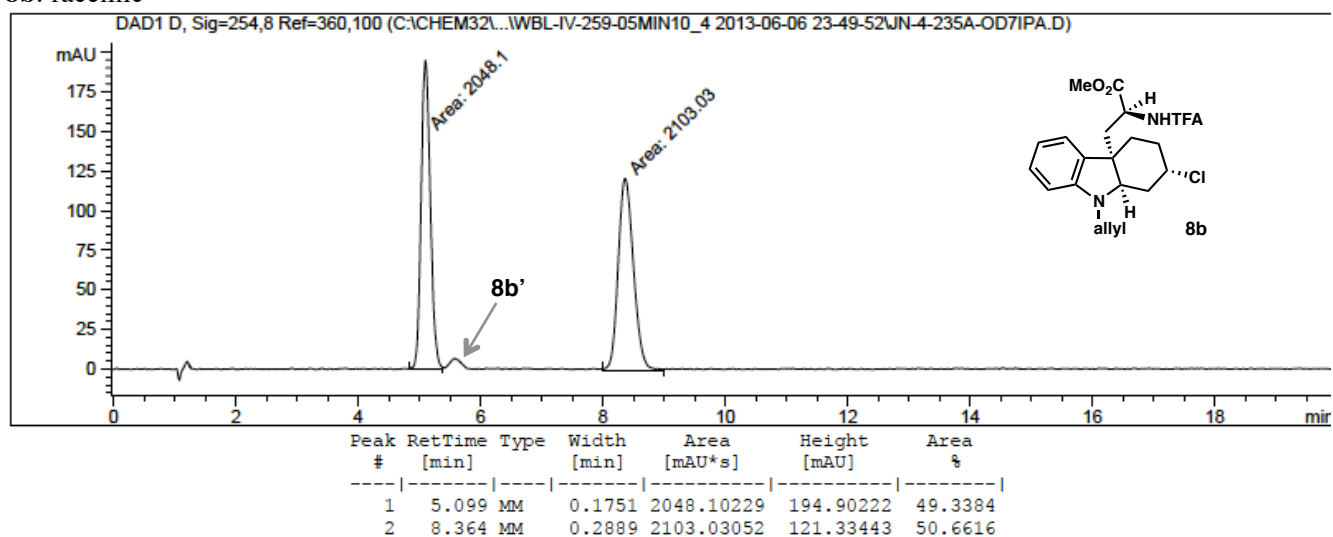

**8b: 89% ee**

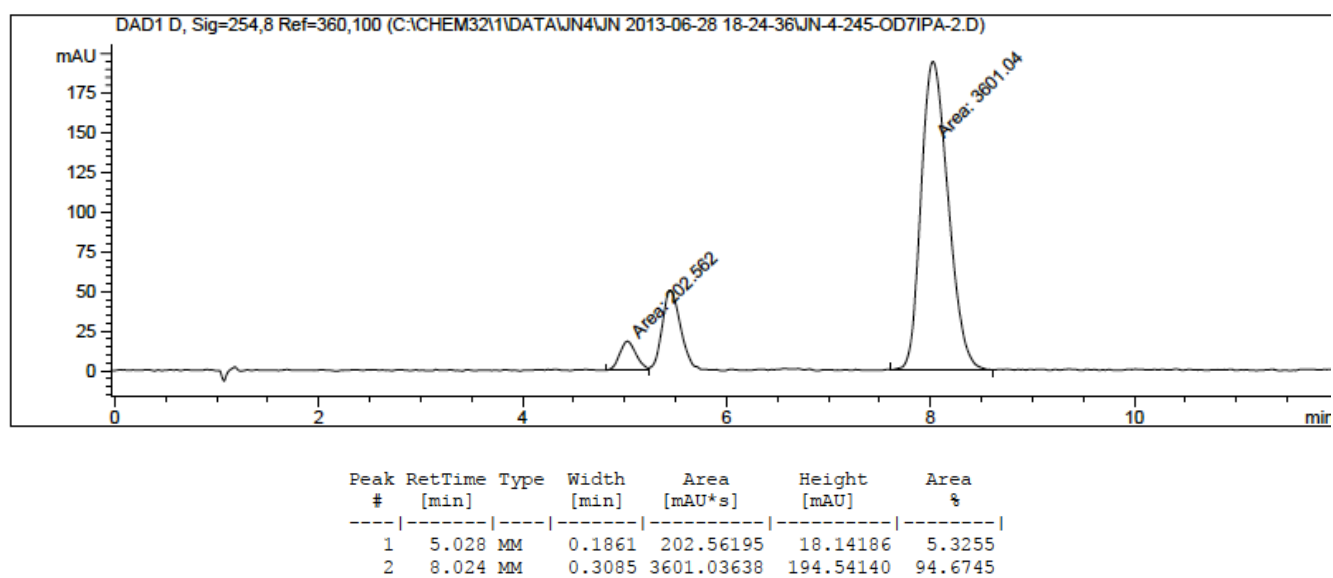

**8c: racemic**

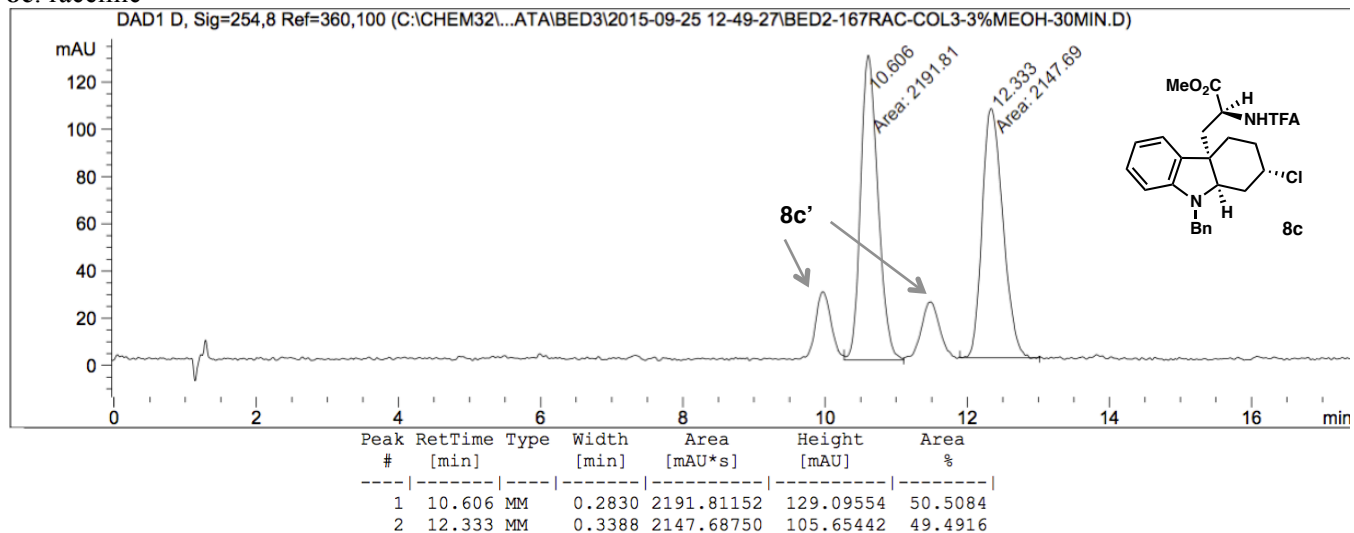

**8c: 86% ee**

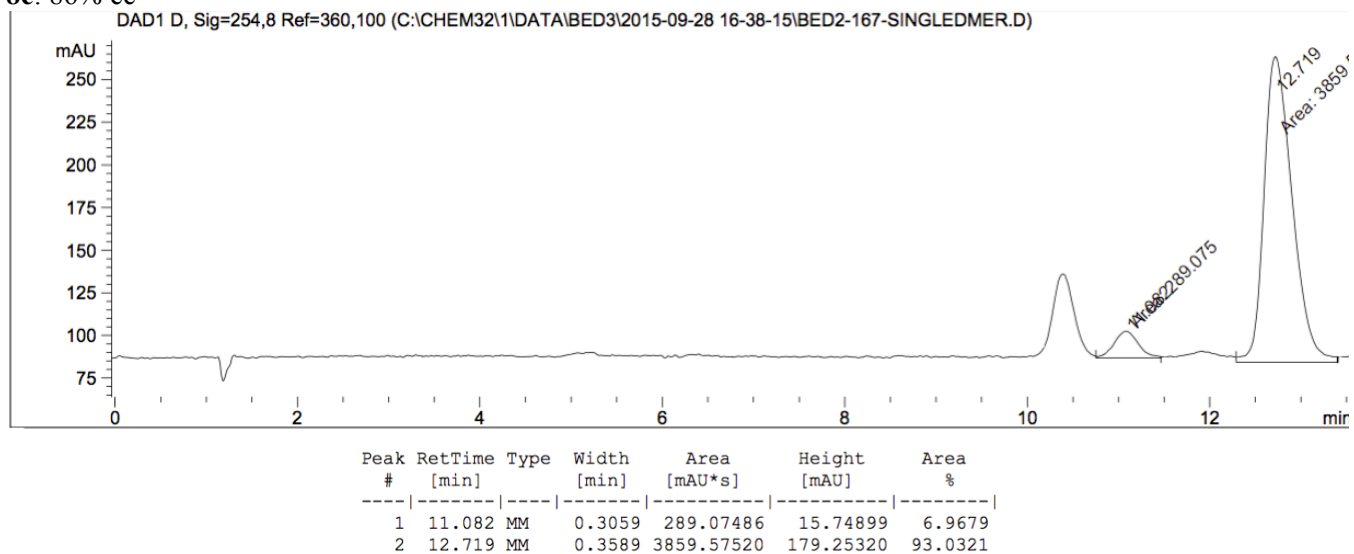

**8d**: racemic

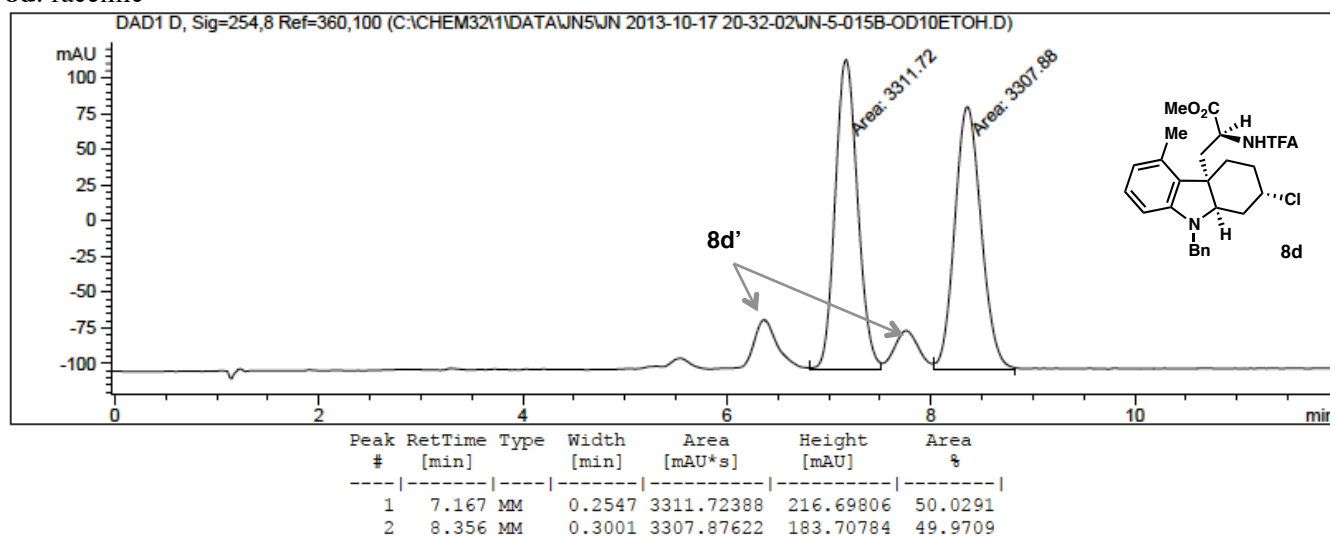

**8d** (major diastereomer purified by column chromatography only): 88% ee

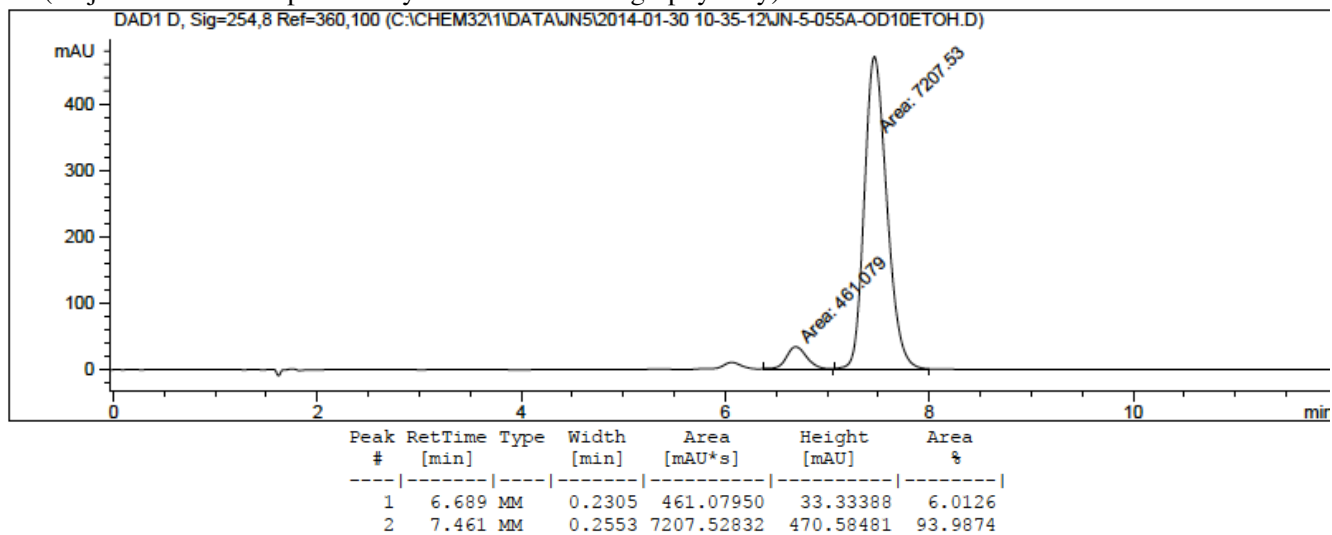

**8e: racemic**

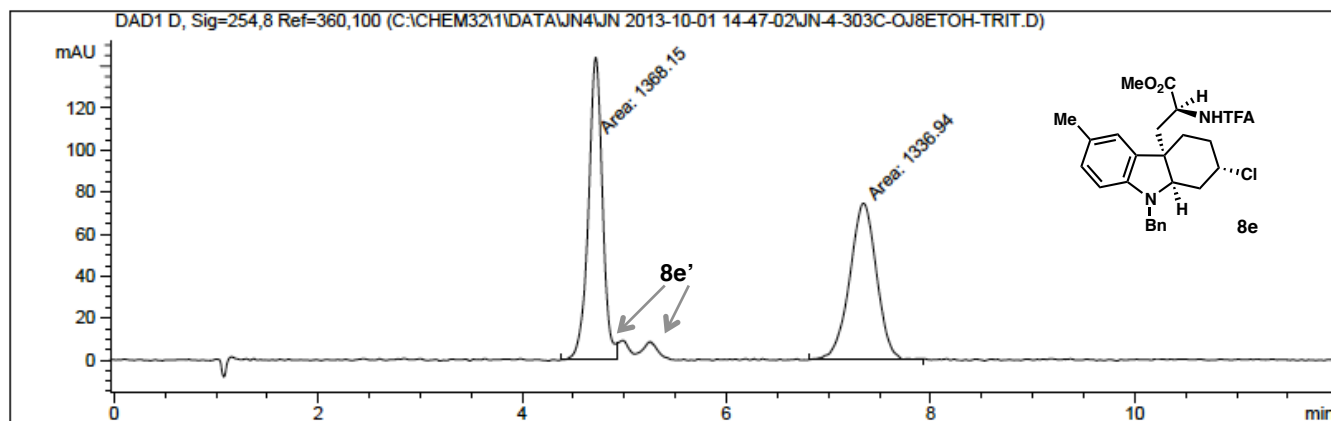

| Peak # | RetTime [min] | Type | Width [min] | Area [mAU*s] | Height [mAU] | Area %  |
|--------|---------------|------|-------------|--------------|--------------|---------|
| 1      | 4.720         | MM   | 0.1588      | 1368.15161   | 143.62547    | 50.5769 |
| 2      | 7.343         | MM   | 0.3010      | 1336.93970   | 74.03839     | 49.4231 |

**8e: 92% ee**

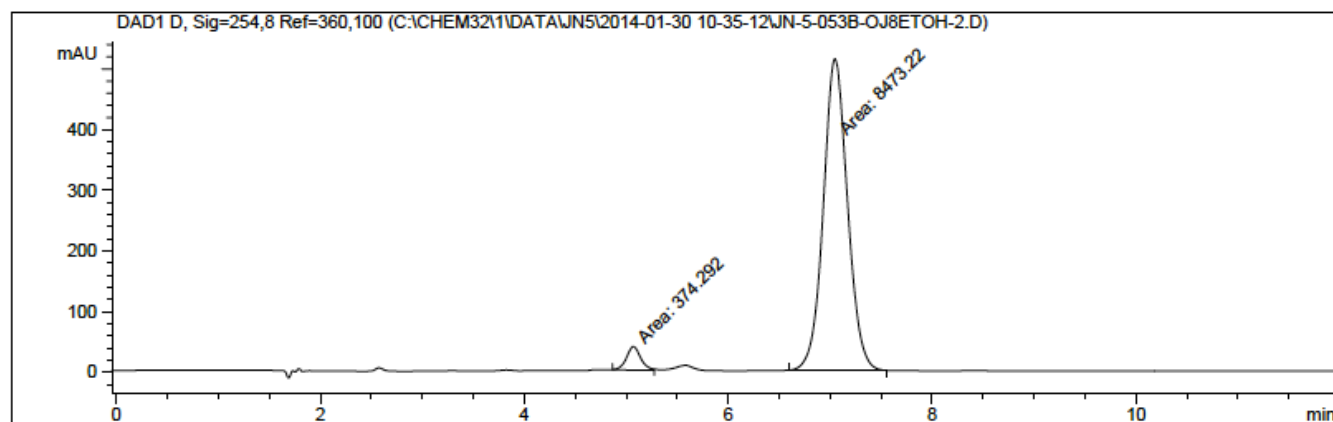

| Peak # | RetTime [min] | Type | Width [min] | Area [mAU*s] | Height [mAU] | Area %  |
|--------|---------------|------|-------------|--------------|--------------|---------|
| 1      | 5.071         | MM   | 0.1609      | 374.29236    | 38.77222     | 4.2305  |
| 2      | 7.047         | MM   | 0.2750      | 8473.22168   | 513.56281    | 95.7695 |

8f: racemic

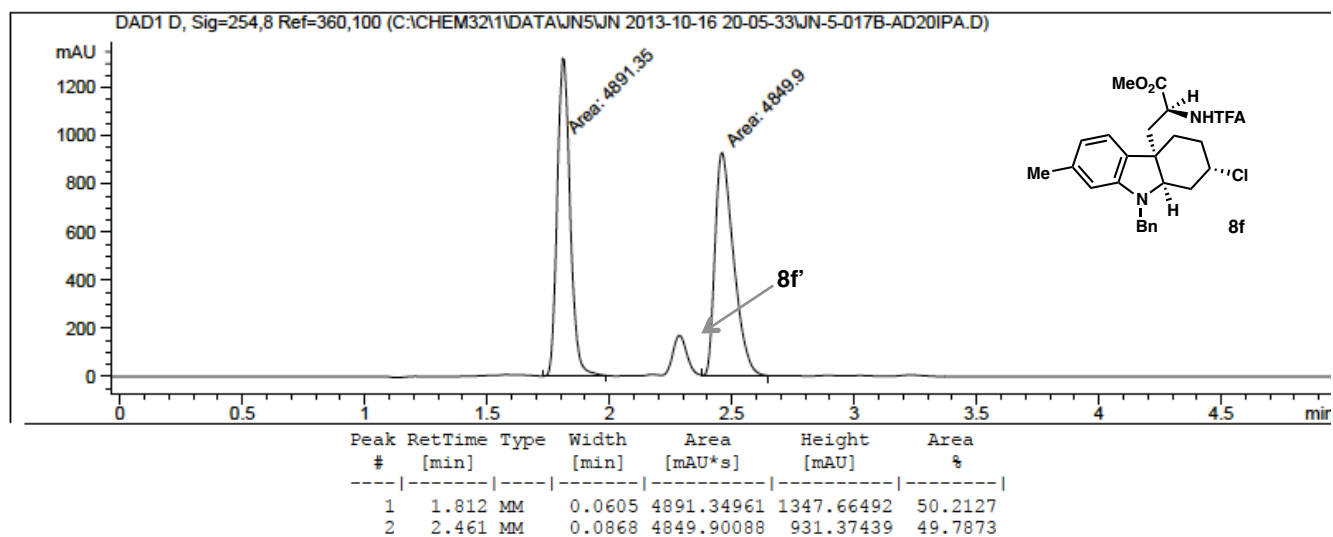

8f: 93% ee

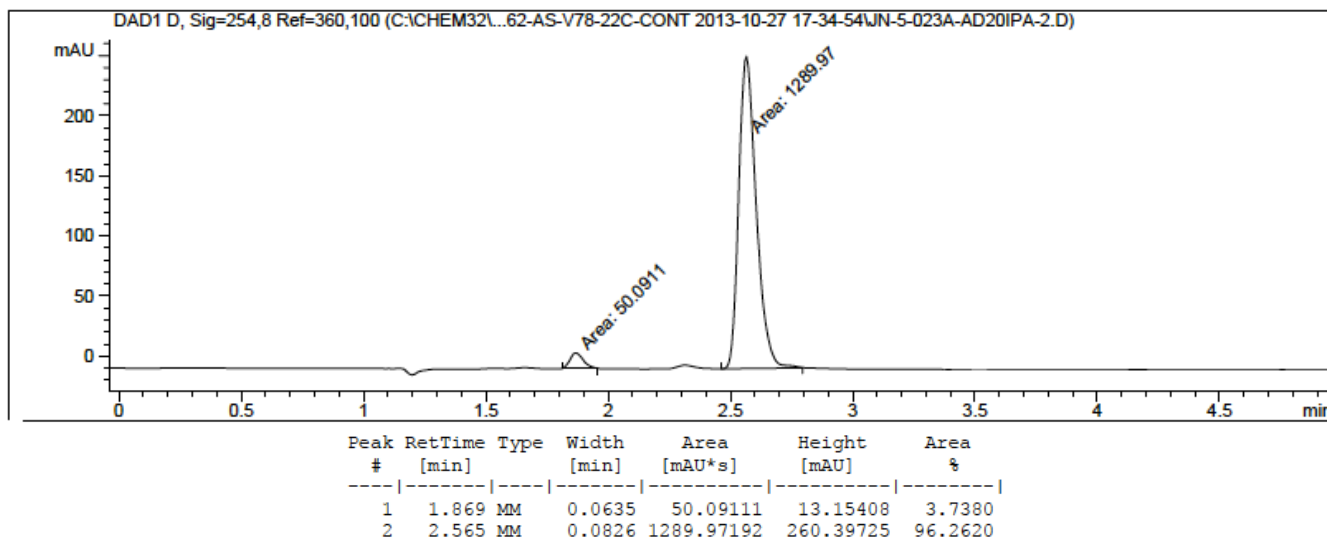

8g: racemic

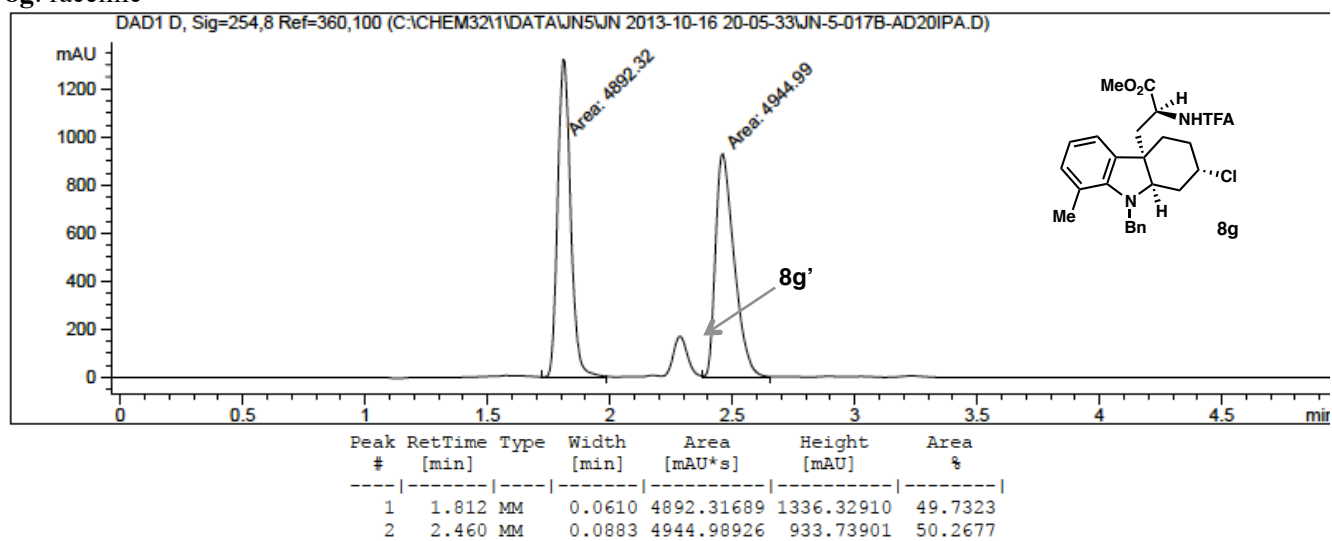

8g: 89% ee

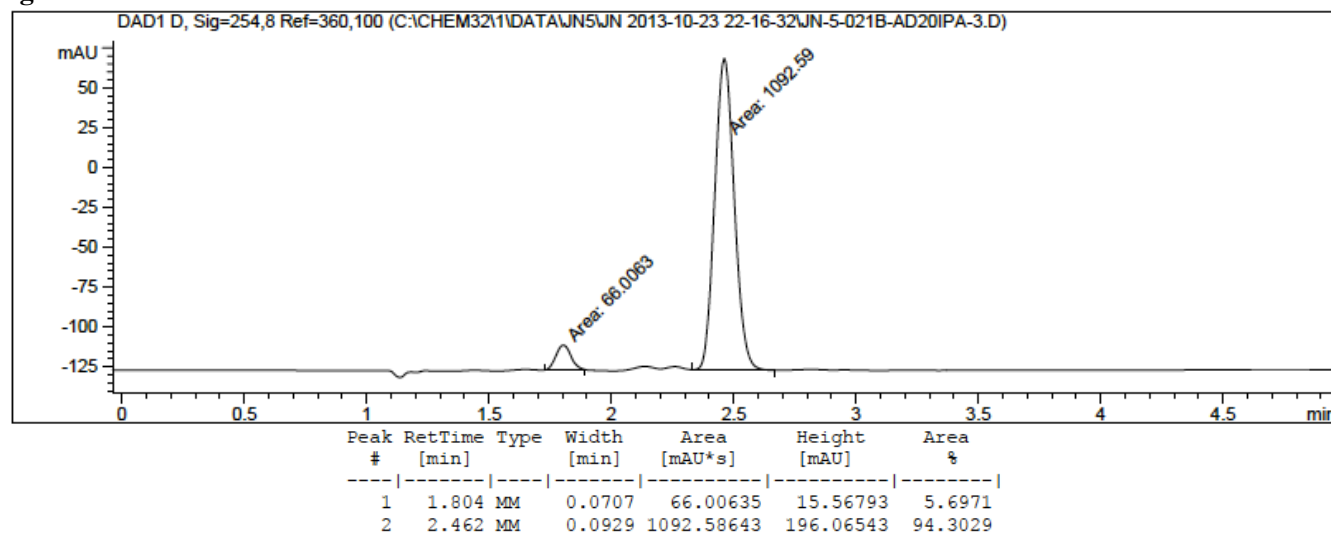



8h: racemic

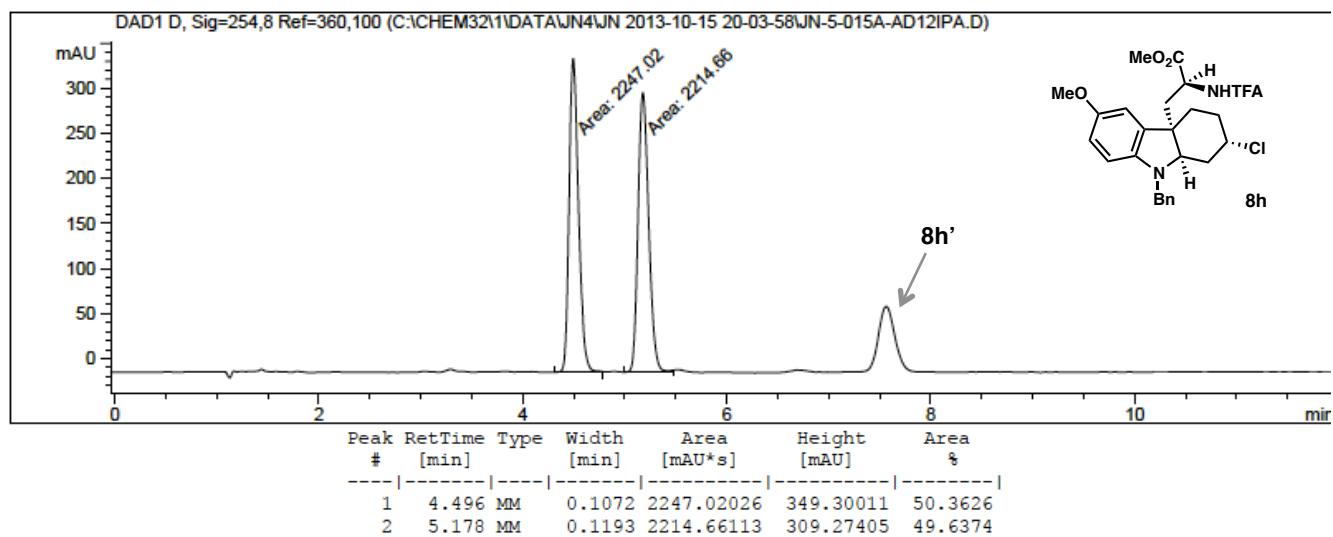

8h: 91% ee

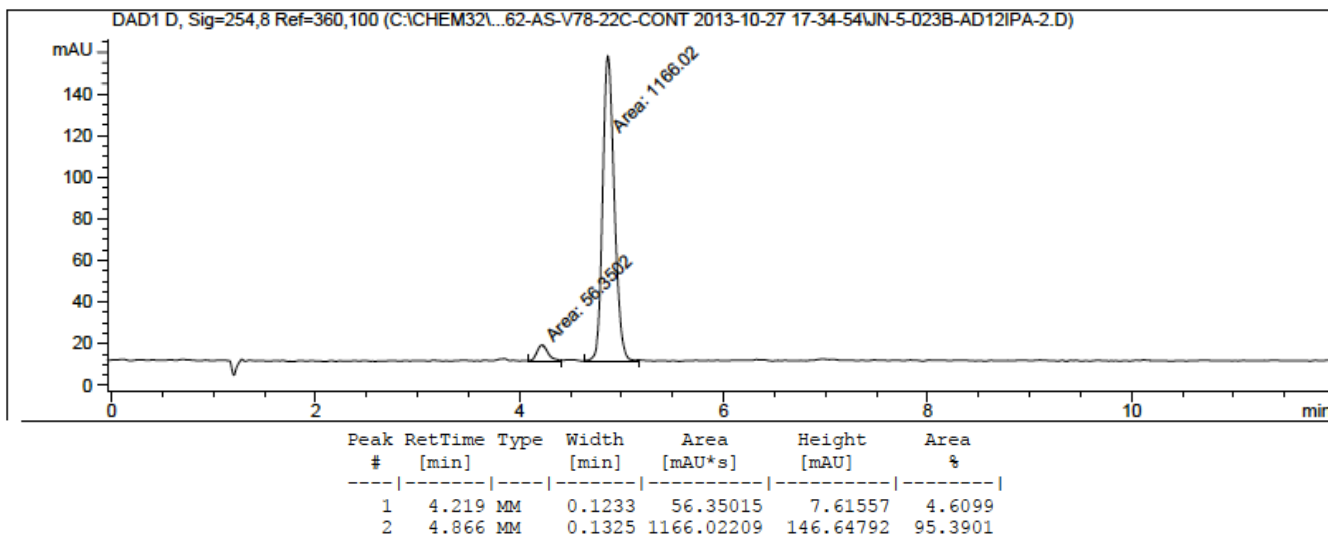

**8i**: racemic

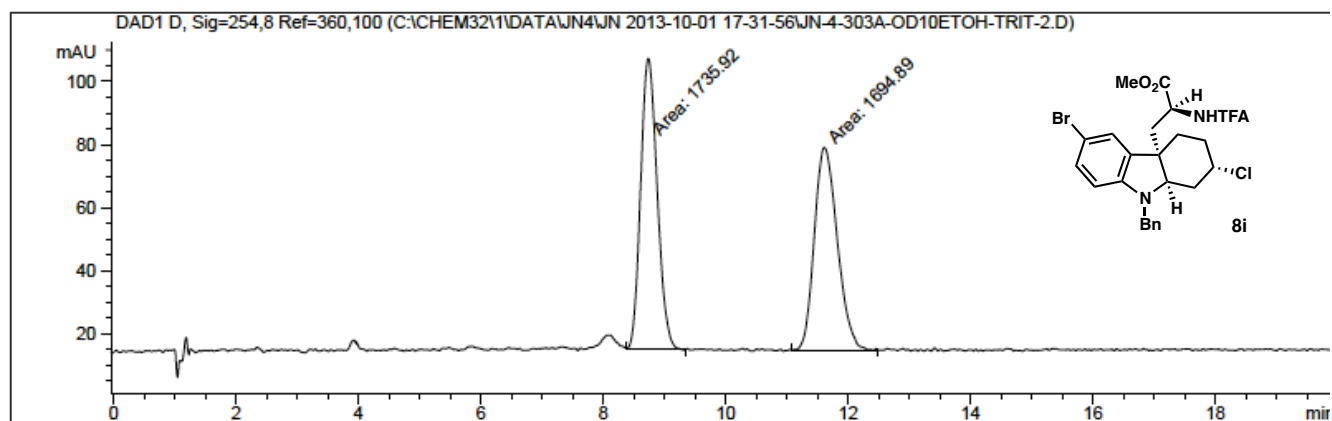

| Peak # | RetTime [min] | Type | Width [min] | Area [mAU*s] | Height [mAU] | Area %  |
|--------|---------------|------|-------------|--------------|--------------|---------|
| 1      | 8.739         | MM   | 0.3135      | 1735.92102   | 92.27703     | 50.5979 |
| 2      | 11.611        | MM   | 0.4383      | 1694.89441   | 64.44508     | 49.4021 |

**8i** (major diastereomer purified by column chromatography only): 85% ee

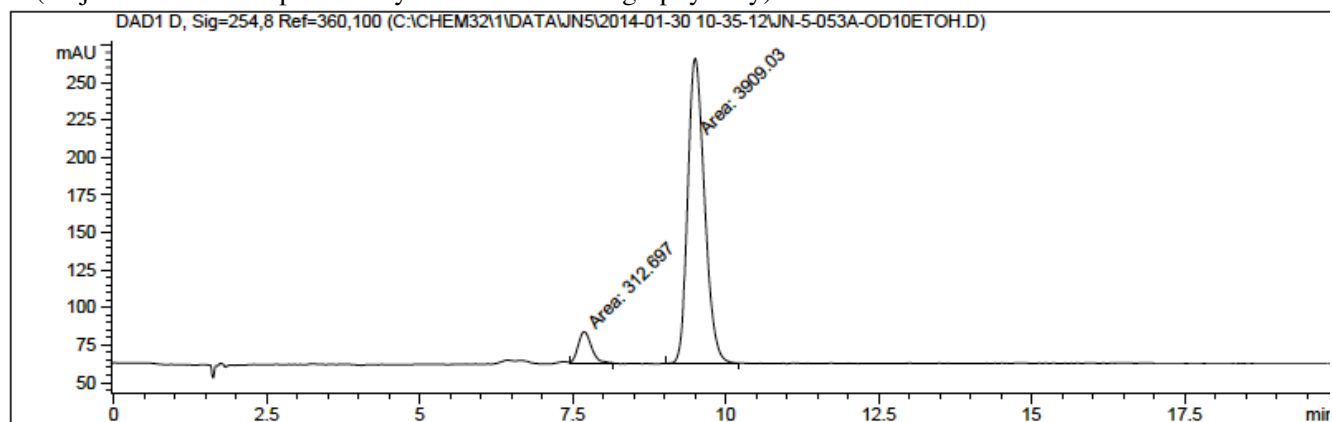

| Peak # | RetTime [min] | Type | Width [min] | Area [mAU*s] | Height [mAU] | Area %  |
|--------|---------------|------|-------------|--------------|--------------|---------|
| 1      | 7.690         | MM   | 0.2497      | 312.69736    | 20.87528     | 7.4069  |
| 2      | 9.505         | MM   | 0.3200      | 3909.02954   | 203.61522    | 92.5931 |

10a: racemic

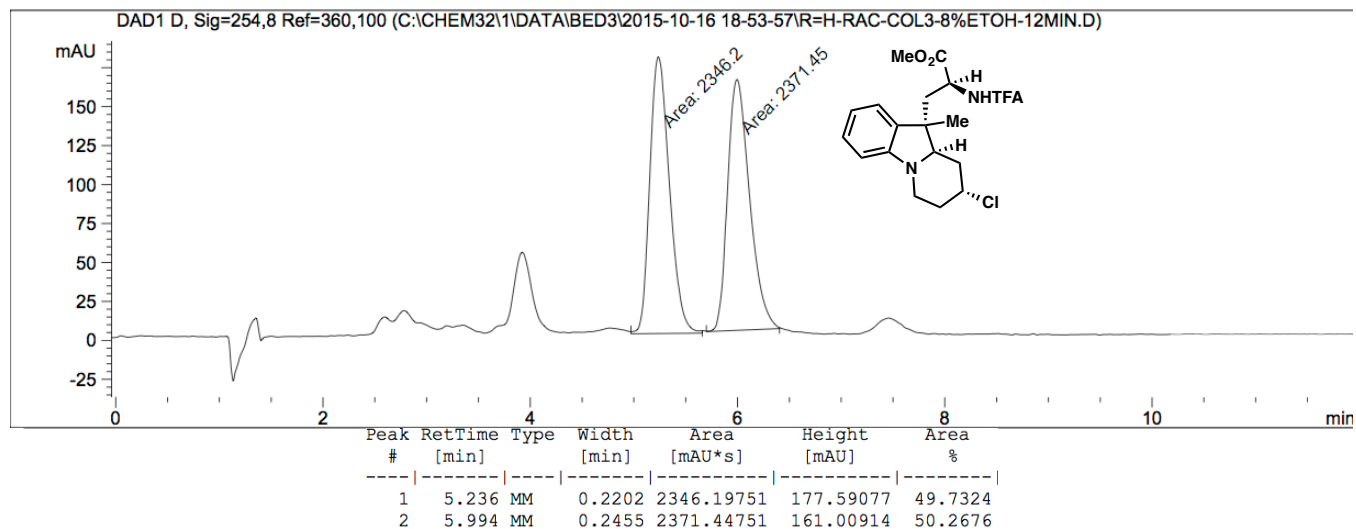

10a: 86% ee

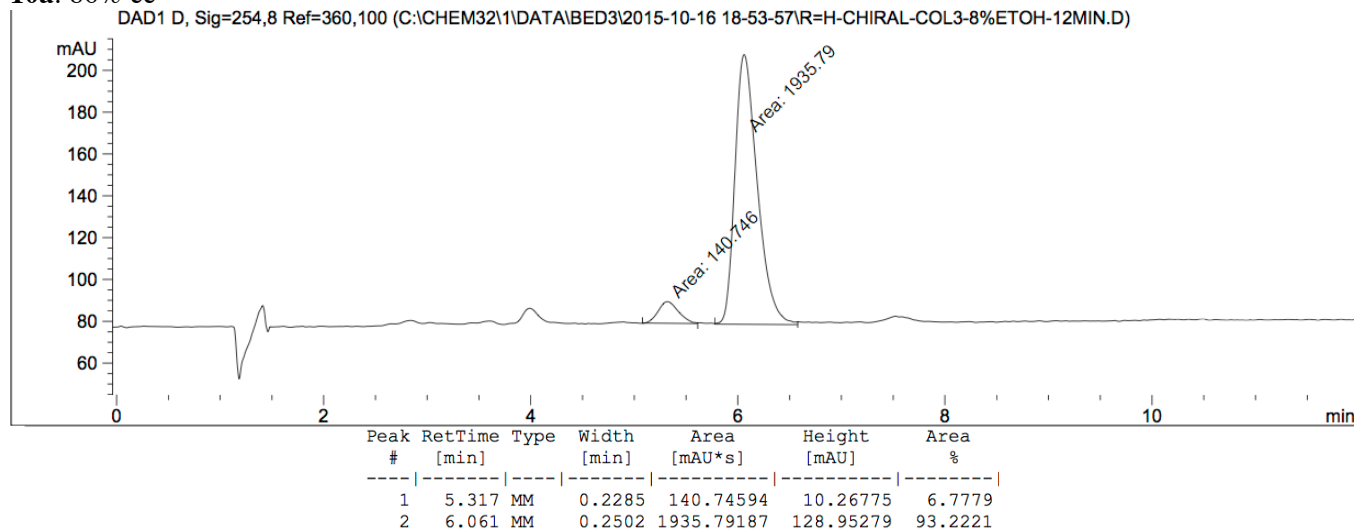

**10b: racemic**

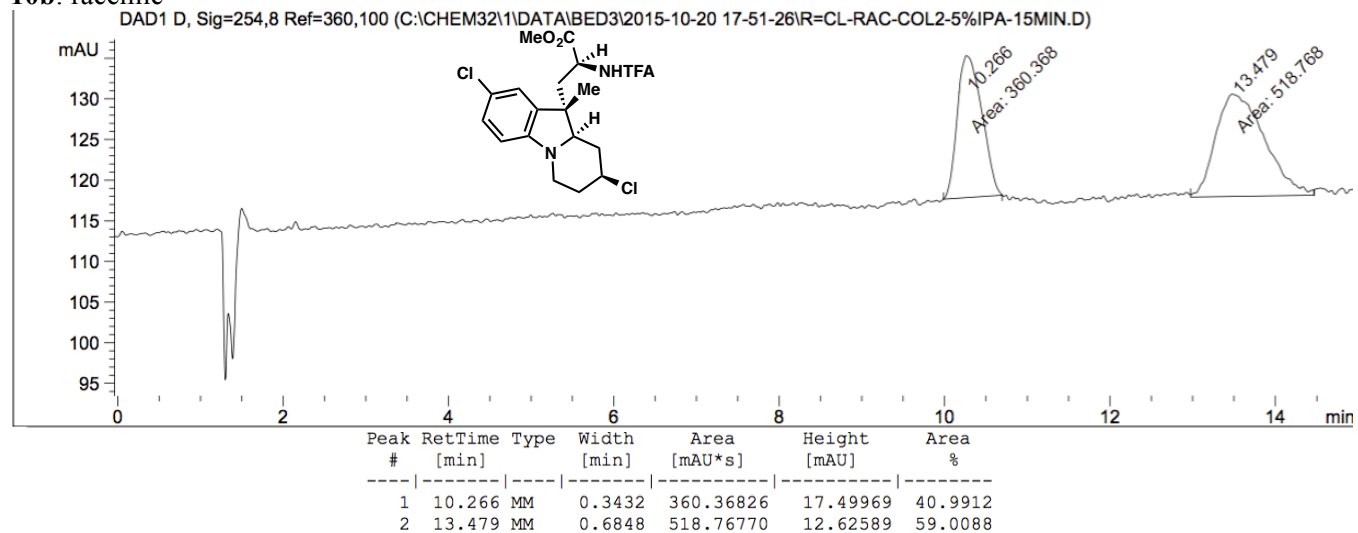

**10b: 87% ee**

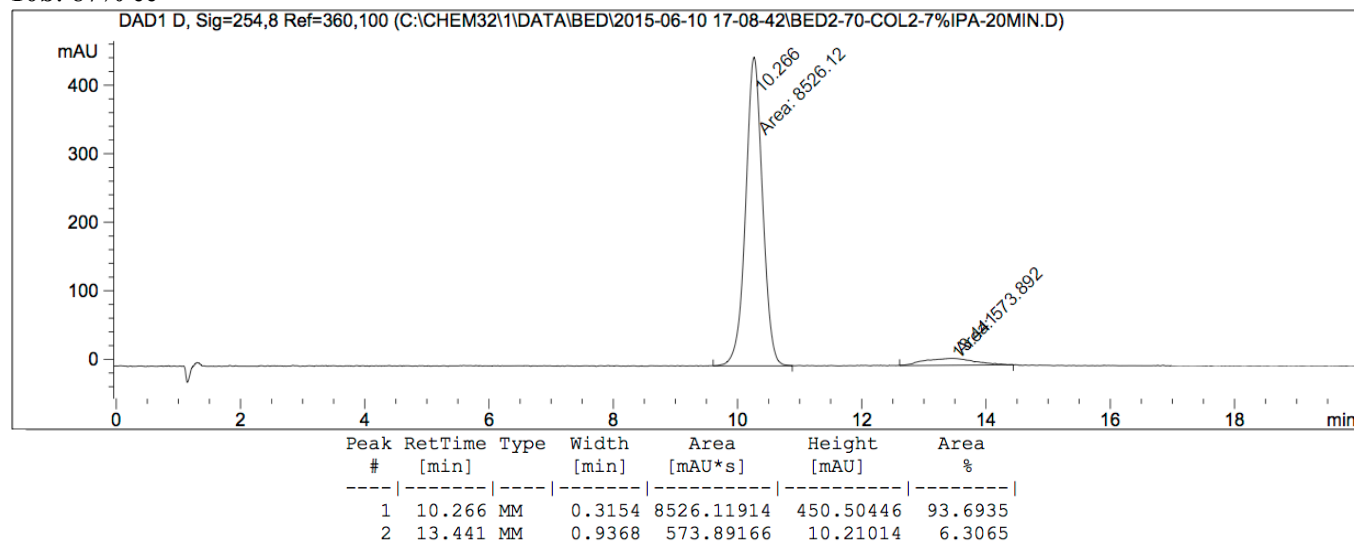

10c: racemic

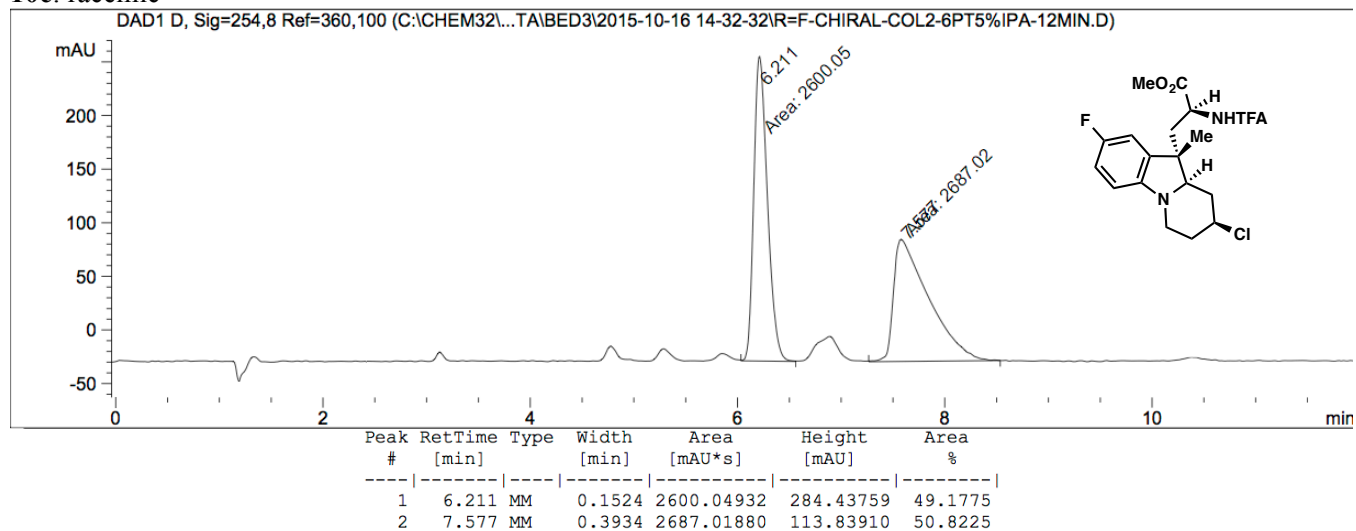

10c: 84% ee

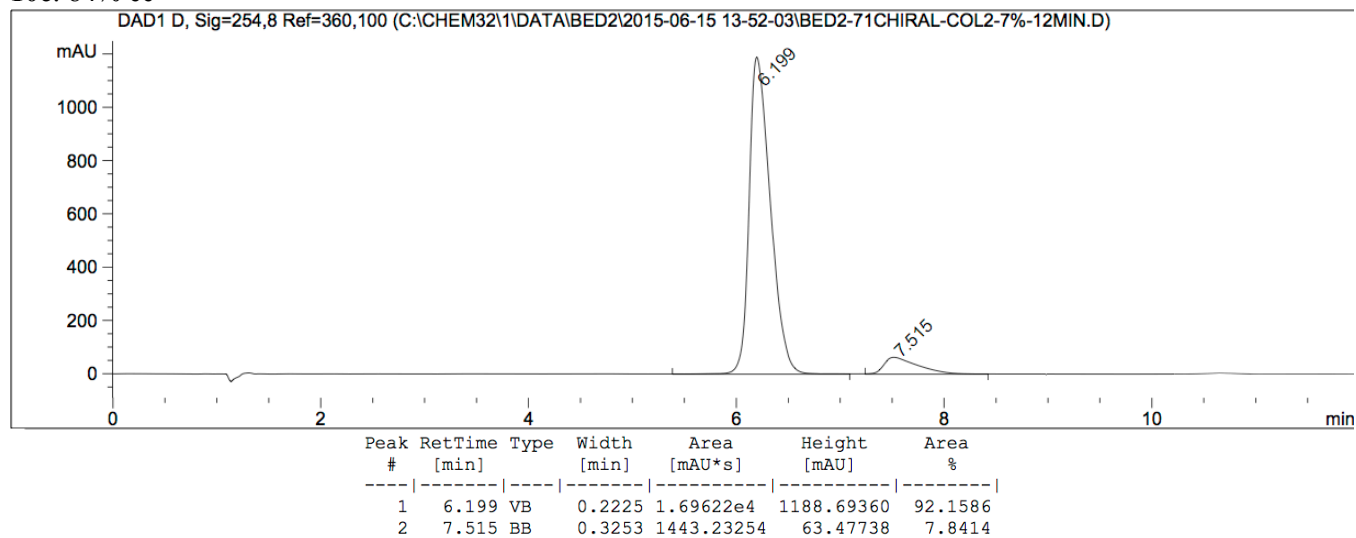

**10d: racemic**

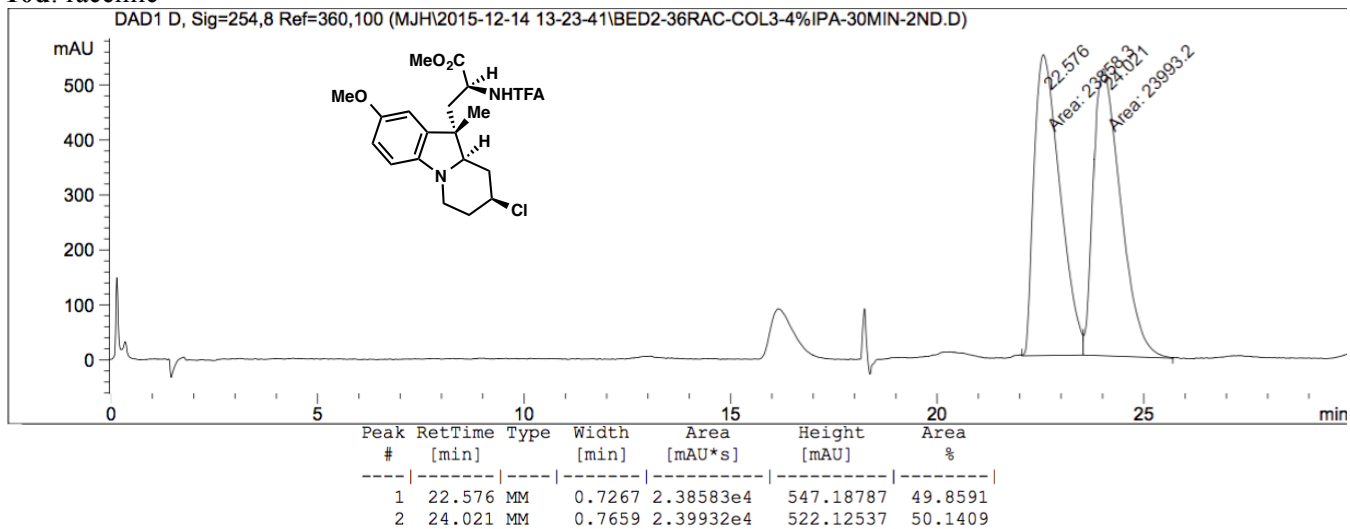

**10d: 81% ee**

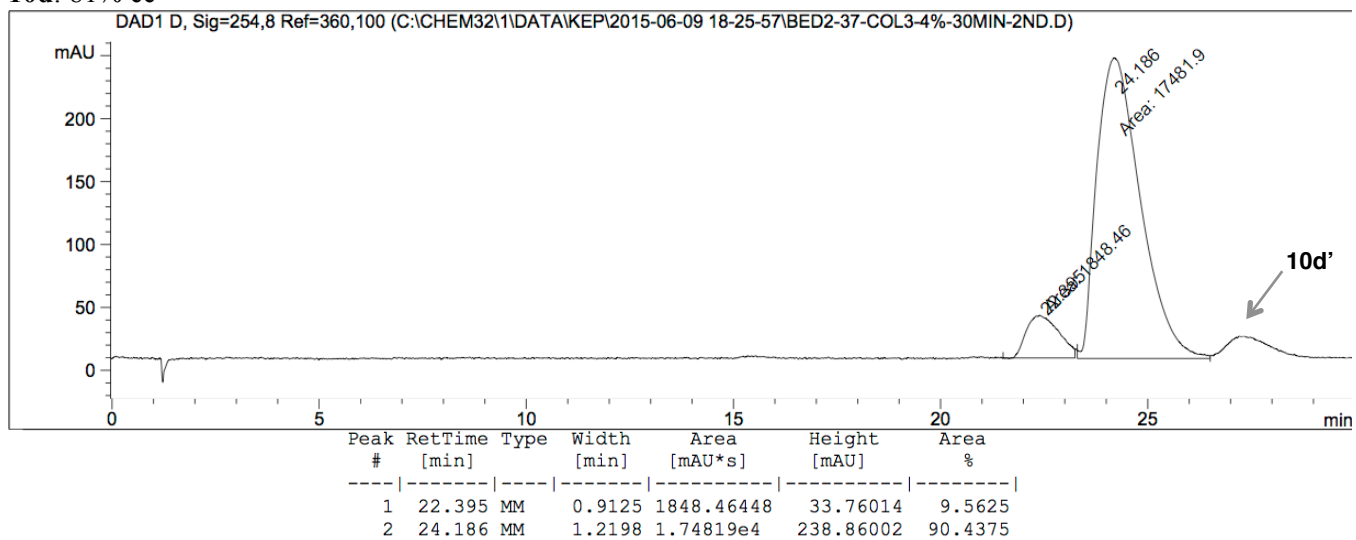

10e: racemic

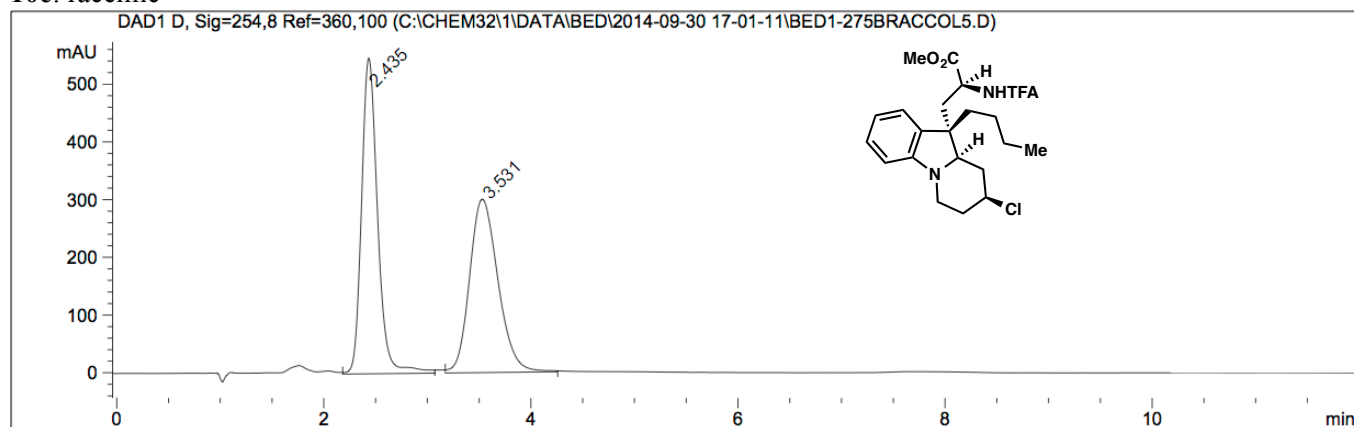

| Peak # | RetTime [min] | Type | Width [min] | Area [mAU*s] | Height [mAU] | Area %  |
|--------|---------------|------|-------------|--------------|--------------|---------|
| 1      | 2.435         | VB   | 0.1658      | 5897.84619   | 547.18097    | 50.7050 |
| 2      | 3.531         | BB   | 0.2947      | 5733.85010   | 300.42203    | 49.2950 |

10e: 90% ee

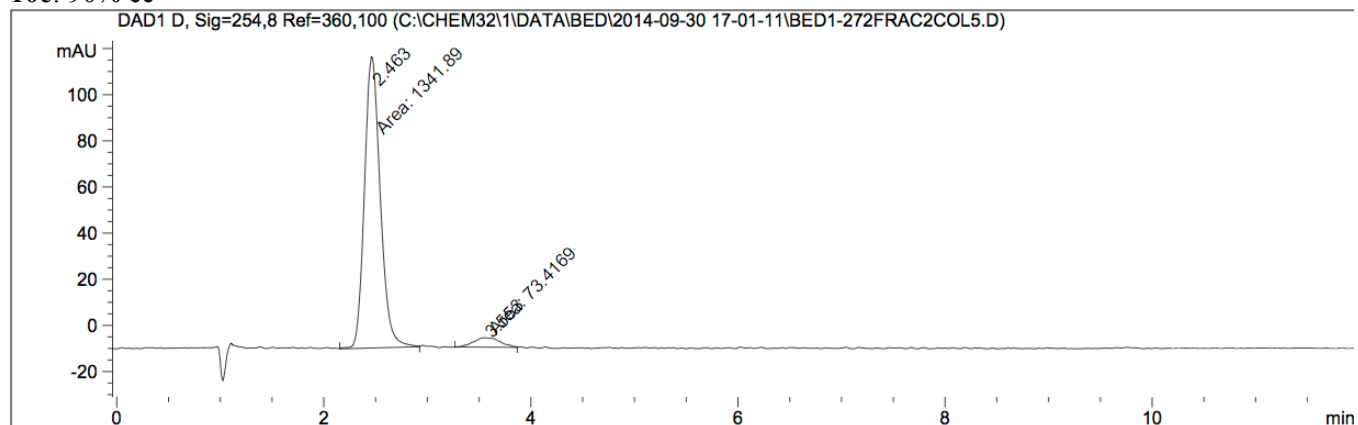

| Peak # | RetTime [min] | Type | Width [min] | Area [mAU*s] | Height [mAU] | Area %  |
|--------|---------------|------|-------------|--------------|--------------|---------|
| 1      | 2.463         | MM   | 0.1771      | 1341.88623   | 126.29272    | 94.8126 |
| 2      | 3.553         | MM   | 0.2999      | 73.41692     | 4.08012      | 5.1874  |

**10f: racemic**

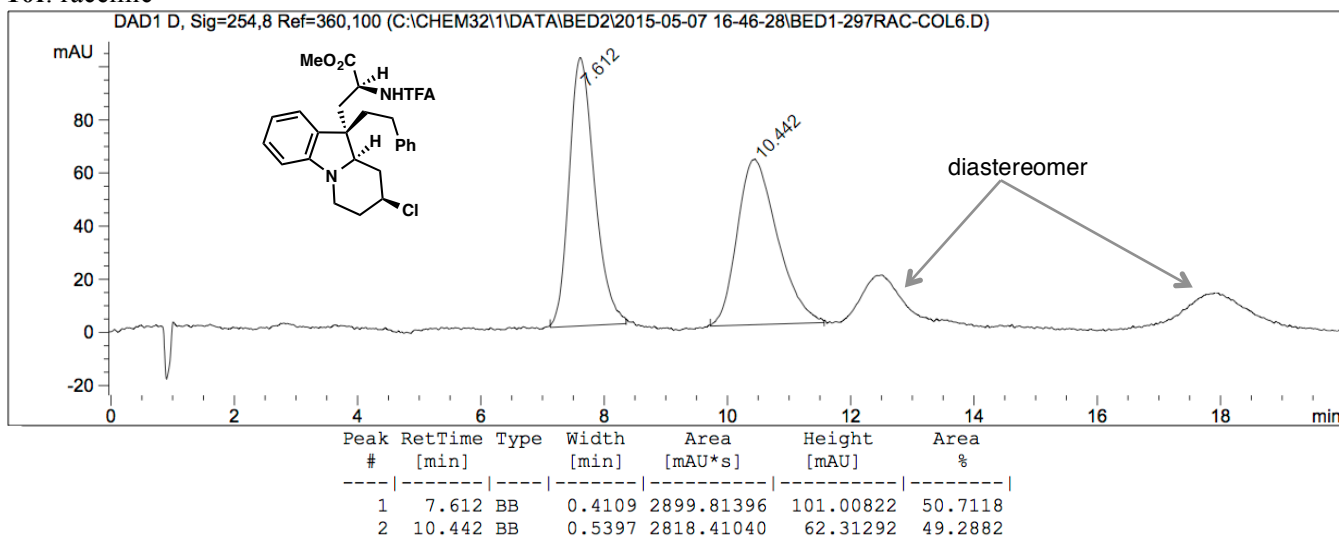

**10f: 91% ee**

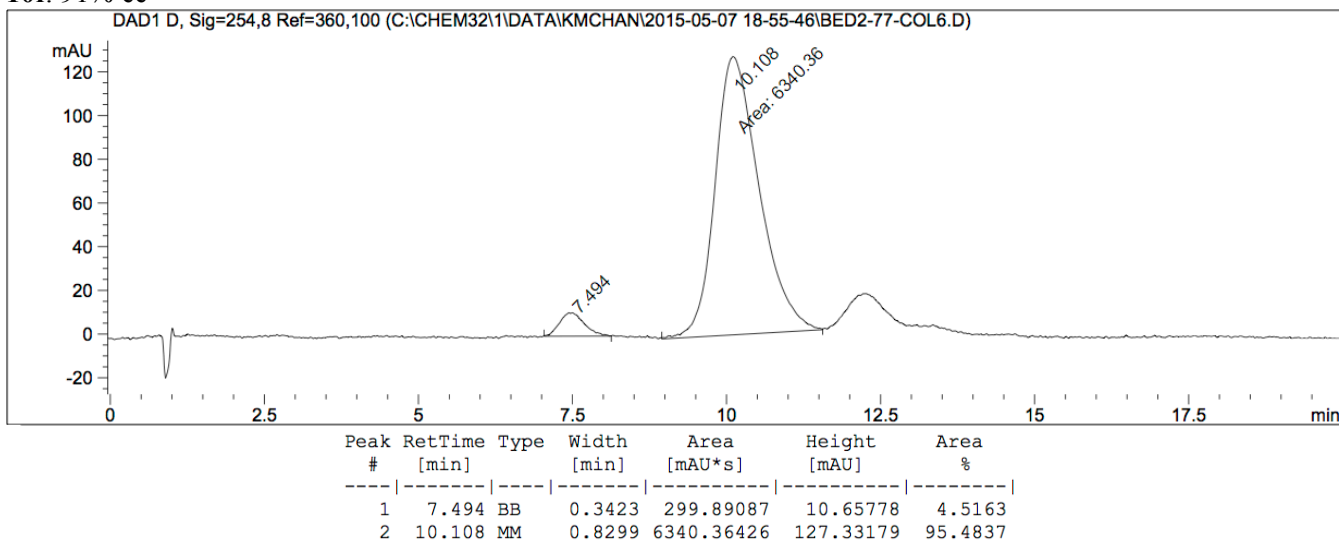



### Synthesis of deuterated amidoacrylate 7-d<sub>1</sub>

Acrylate **2a** (1.97 g, 10 mmol, 1.0 equiv) was dissolved in 50 mL CH<sub>2</sub>Cl<sub>2</sub> and cooled to -78 °C. Molecular bromine (0.51 mL, 10 mmol, 1.0 equiv) was added dropwise, and the reaction was stirred for 10 minutes before moving to an ice bath, where it was stirred for 40 minutes. DABCO (1.1 g, 10 mmol, 1.0 equiv) was added as a solution in 15 mL CH<sub>2</sub>Cl<sub>2</sub>. The reaction was stirred for 1.5 h, then filtered through celite, and concentrated. The crude mixture was purified by flash chromatography (30% Et<sub>2</sub>O/pentane) to provide bromoacrylate **S7** in 74% yield (2.03 g).

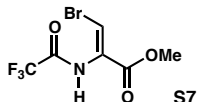

**S7**: <sup>1</sup>H NMR (300 MHz, acetone) δ 7.89 (s, 1H), 3.80 (s, 3H); <sup>13</sup>C NMR (126 MHz, acetone) δ 161.13, 155.06 (q, *J* = 37.9 Hz), 130.41, 121.72, 115.86 (q, *J* = 287.2 Hz), 52.35; IR (NaCl/thin film) 3256, 1733, 1669, 1623, 1506, 1436, 1336, 1232, 1122 cm<sup>-1</sup>; HRMS (MM) calc'd for C<sub>6</sub>H<sub>5</sub>BrF<sub>3</sub>NO<sub>3</sub> [M+Li]<sup>+</sup> 280.9551, found 280.0969.

Bromoacrylate **S7** (830 mg, 3 mmol) was dissolved in 6 mL ethyl acetate (not dried), and Pd/BaSO<sub>4</sub> (reduced, 29 mg) was added. The reaction was sparged with D<sub>2</sub>, then sealed and stirred until the reaction no longer progressed by TLC (approximately four days). The reaction was filtered through celite, concentrated, and purified by flash chromatography (20% Et<sub>2</sub>O/pentane) to provide deuterium labeled acrylate **2a-d<sub>1</sub>** in 30% yield (180.5 mg).

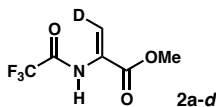

**2a-d<sub>1</sub>**: <sup>1</sup>H NMR (500 MHz, CDCl<sub>3</sub>) δ 8.53 (s, 1H), 6.13 (d, *J* = 1.4 Hz, 1H), 3.92 (s, 3H); <sup>13</sup>C NMR (126 MHz, CDCl<sub>3</sub>) δ 163.5, 155.1 (q, *J*<sub>C-F</sub> = 38.2 Hz), 129.4, 115.2 (q, *J*<sub>C-F</sub> = 288.3 Hz), 112.1 (t, *J*<sub>C-D</sub> = 26 Hz), 53.47; IR (NaCl/thin film) 3385, 1714, 1539, 1444, 1294, 974, 862, 763, 734 cm<sup>-1</sup>; HRMS (MM) calc'd for C<sub>6</sub>H<sub>5</sub>DF<sub>3</sub>N<sub>2</sub>O<sub>3</sub> [M-H]<sup>-</sup> 197.0290, found 197.0295.

***Investigation of the reversibility of the conjugate addition.***

To a flame-dried flask was added indole (0.20 mmol, 1.00 equiv), acrylate (0.24 mmol, 1.20 equiv), and (*R*)-3,3'-dibromo-BINOL (0.04 mmol, 0.20 equiv), and 2,6-dibromophenol (0.20 mmol, 1.00 equiv). The flask was charged with DCM (1.5 mL), followed by addition of TMSCl (0.20 mmol, 1.00 equiv), ZrCl<sub>4</sub> (0.32 mmol, 1.60 equiv), then stirred at room temperature for 30 min. The reaction was quenched by diluting with 1 mL MeCN and 1 mL 1 M HCl, followed by addition of 5 mL H<sub>2</sub>O. The aqueous layer was extracted with ethyl acetate (3 x 5 mL) and the combined organic layers were washed with either saturated NaHCO<sub>3(aq)</sub> (10 mL). The aqueous layer was back extracted with EtOAc (10 mL) and the combined organic layers were dried (Na<sub>2</sub>SO<sub>4</sub>), filtered, and concentrated. The ratio of *Z*-**2a-d** and *E*-**2a-d** was found to be 1:1 by analysis of the <sup>1</sup>H NMR of the crude reaction mixture. The combined yield of product (both diastereomers) was determined to be 44% by <sup>1</sup>H NMR by integration of the product signals at 4.55 ppm and 4.63 ppm relative to that of 3,3'-dibromo-BINOL (as an internal standard).

JN-5-117

Sample Name JN-5-117  
Date collected 2014-08-05

Pulse sequence PROTON  
Solvent cdcl3

Temperature 25  
Spectrometer -vnmrs400

Study owner jni  
Operator autouser

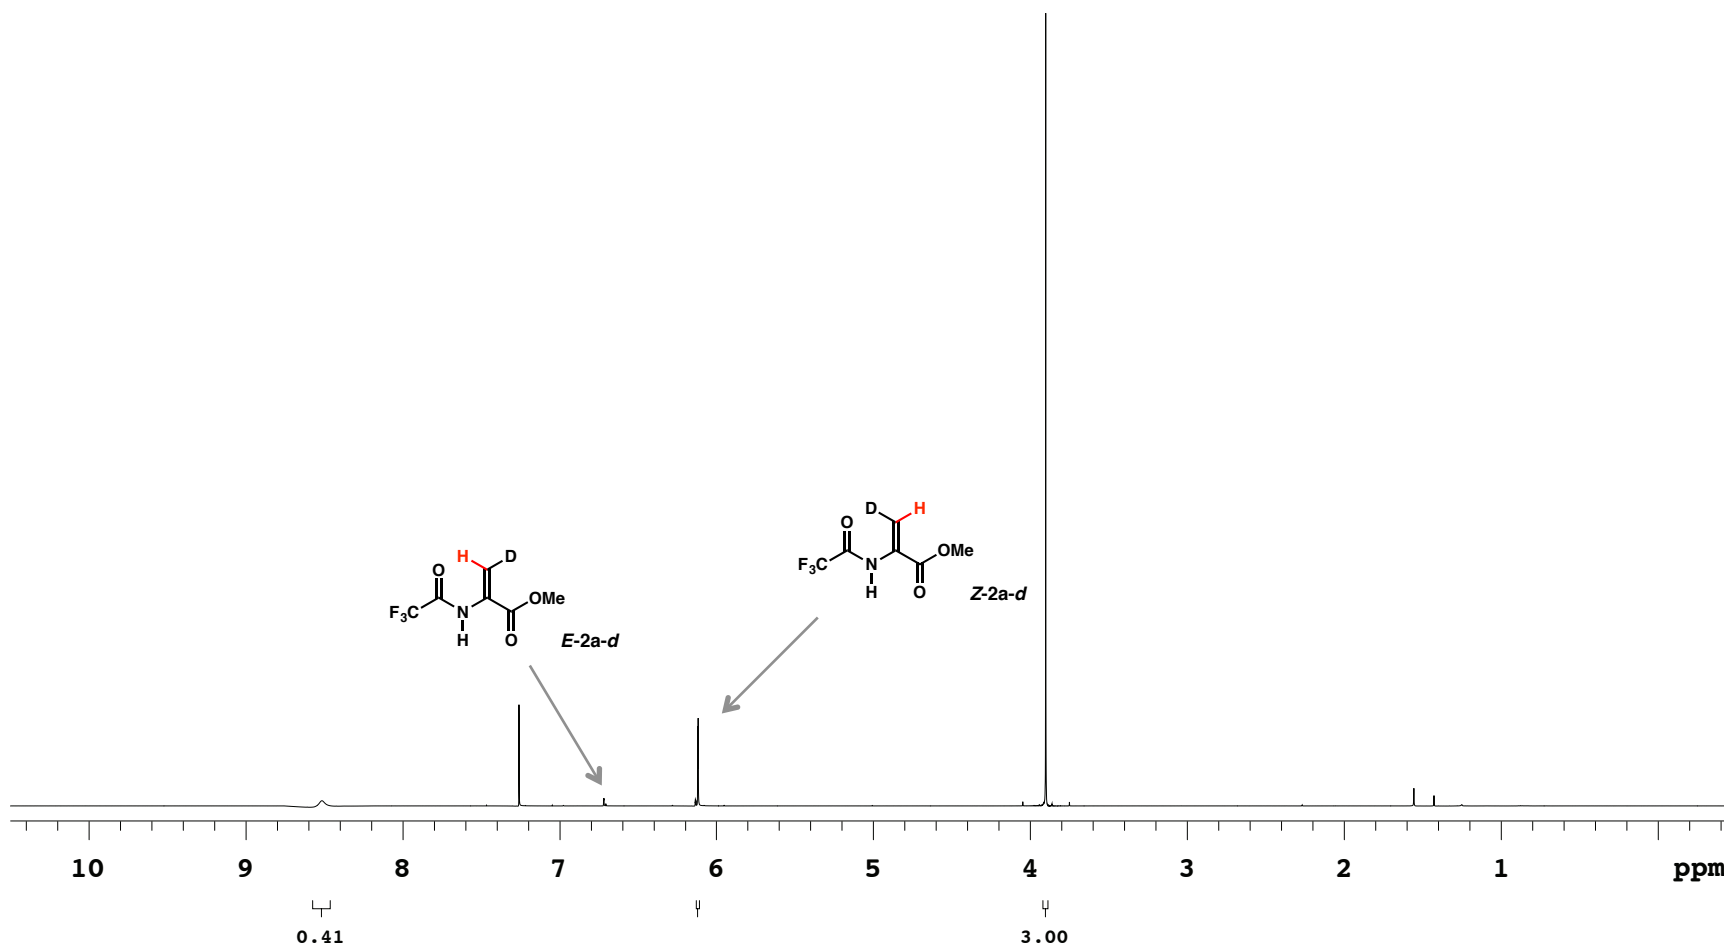

JN-5-121a-crude

Sample Name JN-5-121a-crude  
Date collected 2014-05-11

Pulse sequence PROTON  
Solvent cdcl3

Temperature 25  
Spectrometer indy.caltech.edu-inova500

Study owner jni  
Operator jni

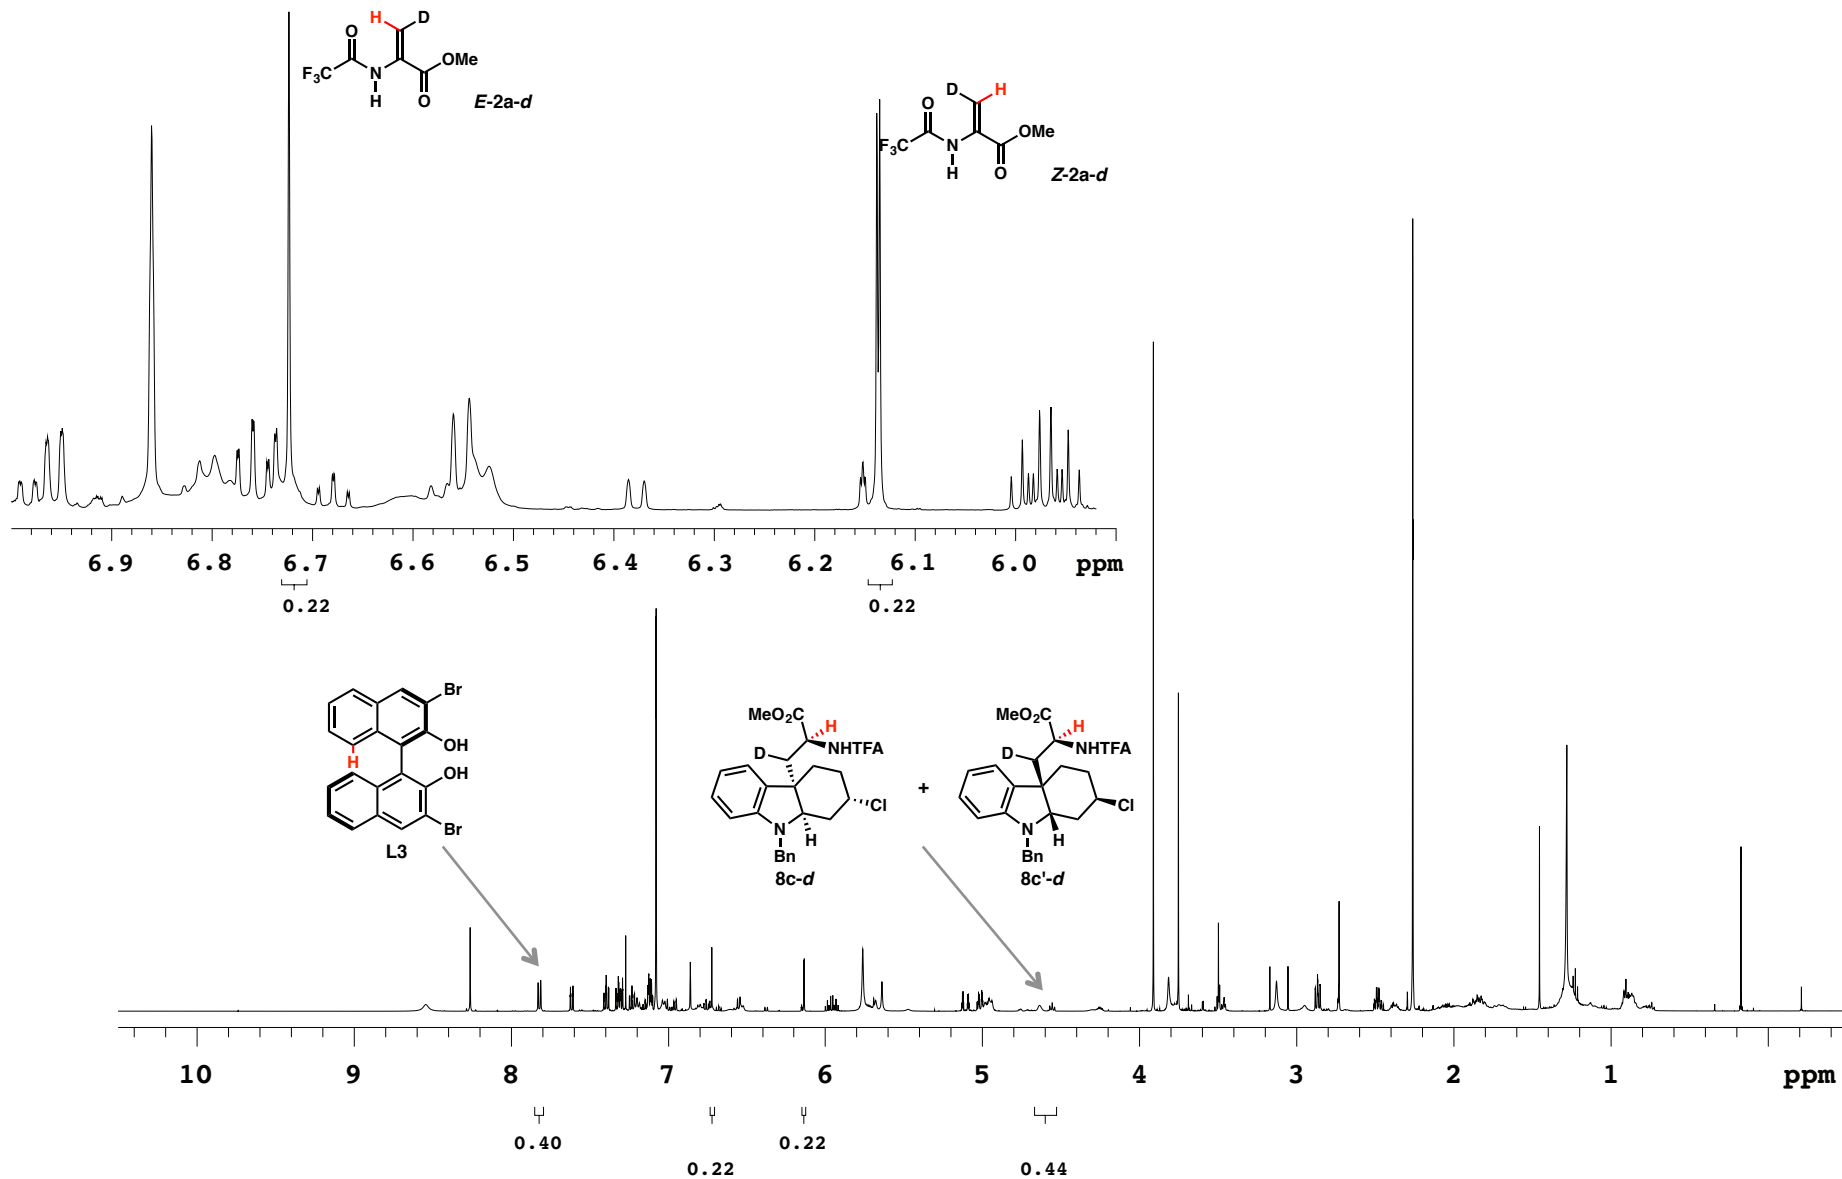

## Epimerization Studies

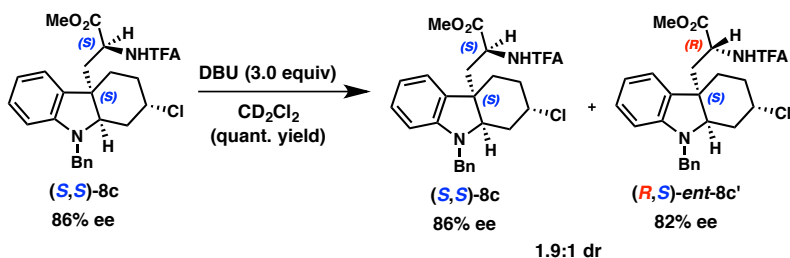

Diastereomerically pure **8c** (1.0 equiv) was dissolved in CD<sub>2</sub>Cl<sub>2</sub> and DBU (3.0 equiv) was added. After 24 h, the reaction mixture was concentrated in vacuo. SFC analysis (OD-H, 2.5 mL/min, 3% MeOH in CO<sub>2</sub>, λ = 254 nm) showed that the previously diastereomerically pure **8c** was now a 1.8:1 mixture of **(S,S)-8c** and **(R,S)-ent-8c'**, where **(R,S)-ent-8c'** is the enantiomer of the minor diastereomer originally formed in the Prins reaction.

**8c**: racemic, mixture of major and minor diastereomers

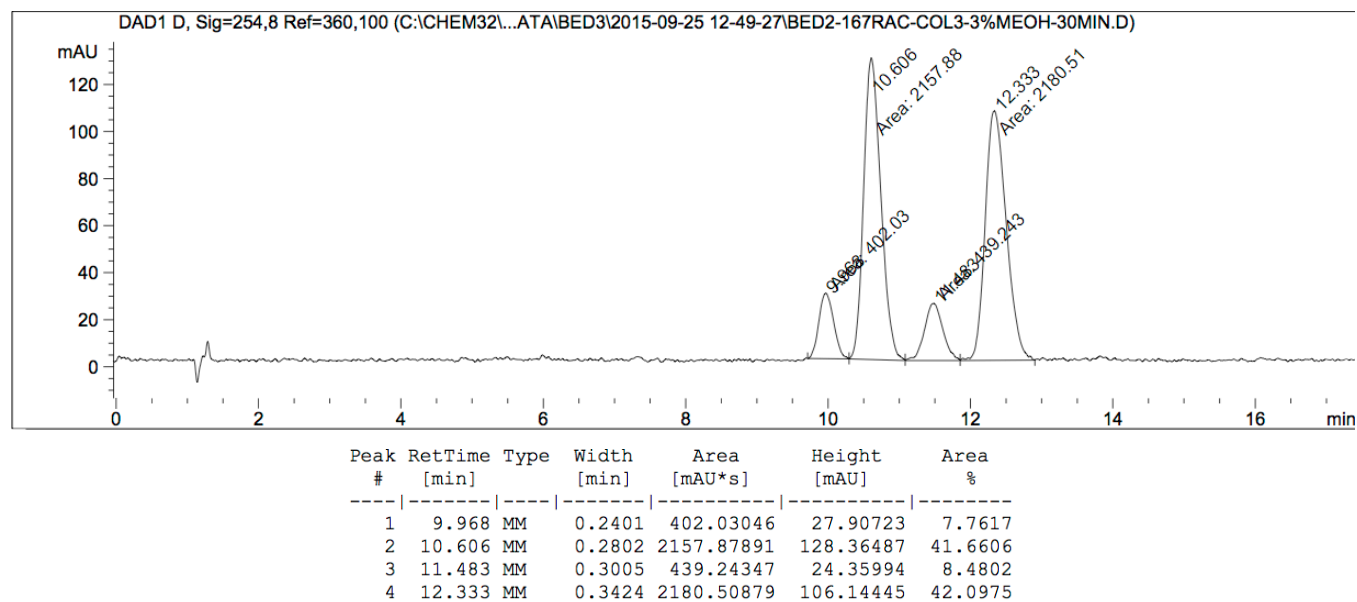

8c: enantioenriched, mixture of major and minor diastereomers

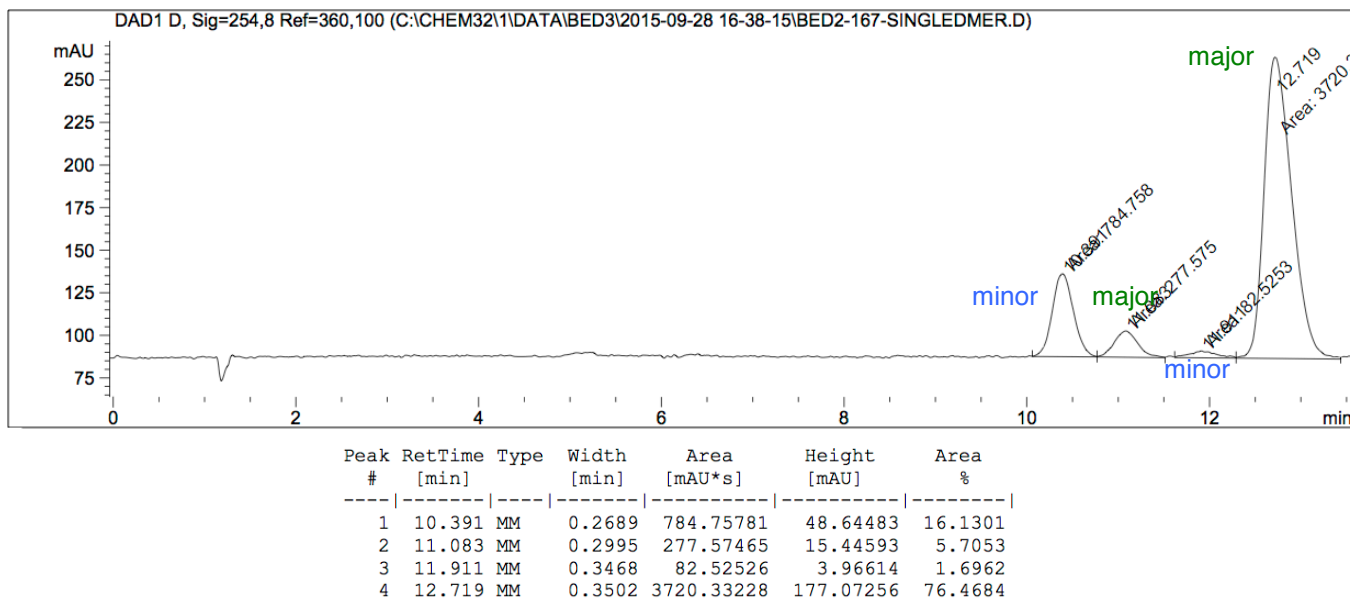

8c: enantioenriched, major diastereomer, before epimerization

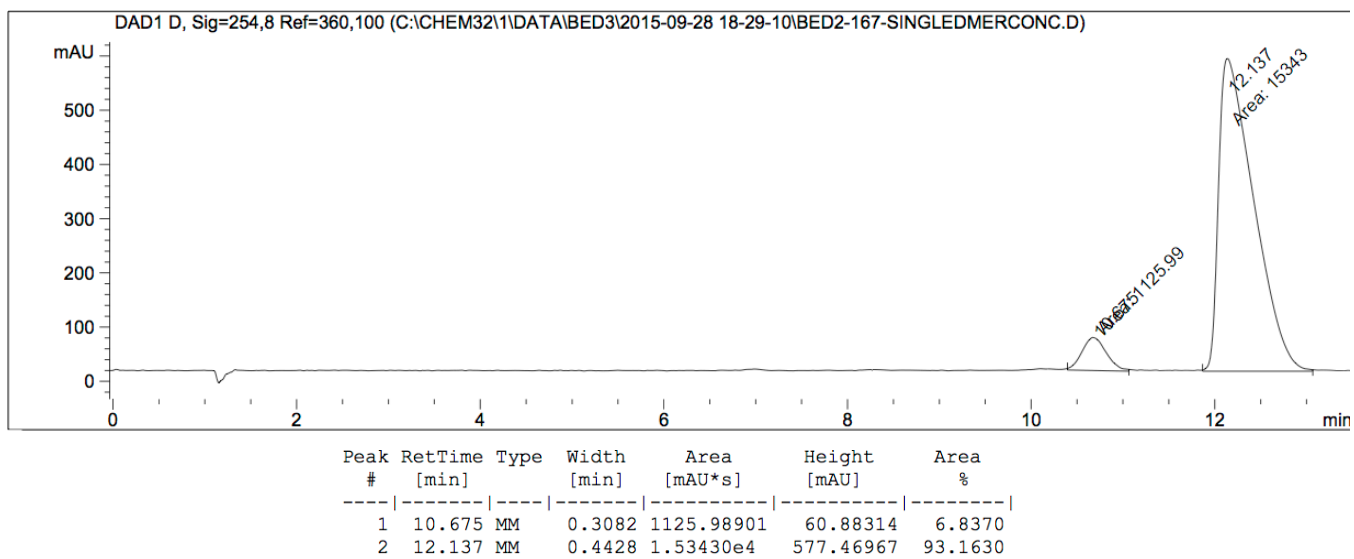

**8c** and *ent*-**8c'**: after epimerization

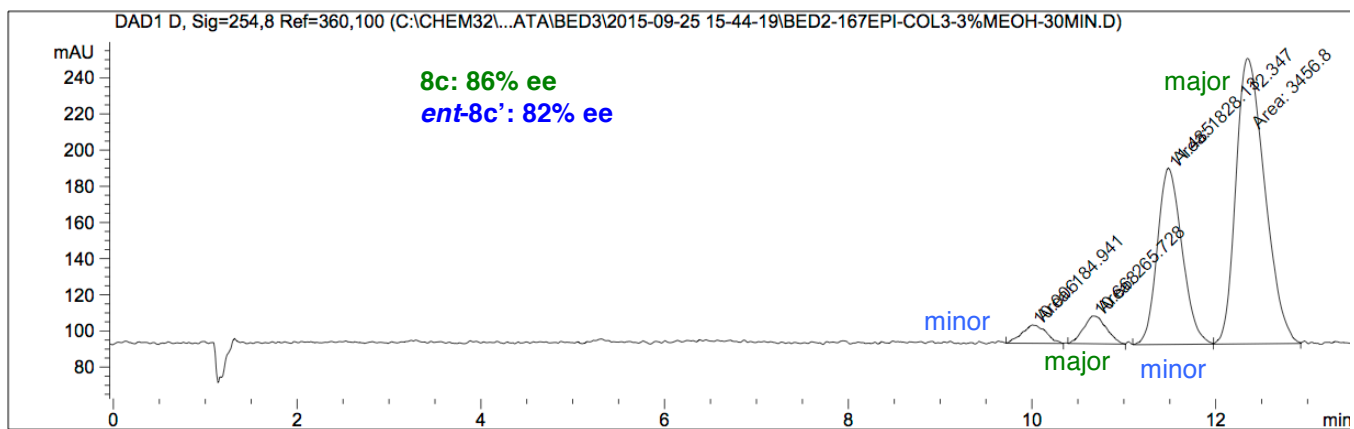

| Peak # | RetTime [min] | Type | Width [min] | Area [mAU*s] | Height [mAU] | Area %  |
|--------|---------------|------|-------------|--------------|--------------|---------|
| 1      | 10.006        | MM   | 0.3056      | 184.94051    | 10.08753     | 3.2244  |
| 2      | 10.668        | MM   | 0.2887      | 265.72806    | 15.34276     | 4.6330  |
| 3      | 11.485        | MM   | 0.3125      | 1828.13062   | 97.48498     | 31.8734 |
| 4      | 12.347        | MM   | 0.3646      | 3456.80005   | 158.02347    | 60.2692 |

## Selected Unsuccessful Substrates

Scheme S1. Unsuccessful alternative substrates.

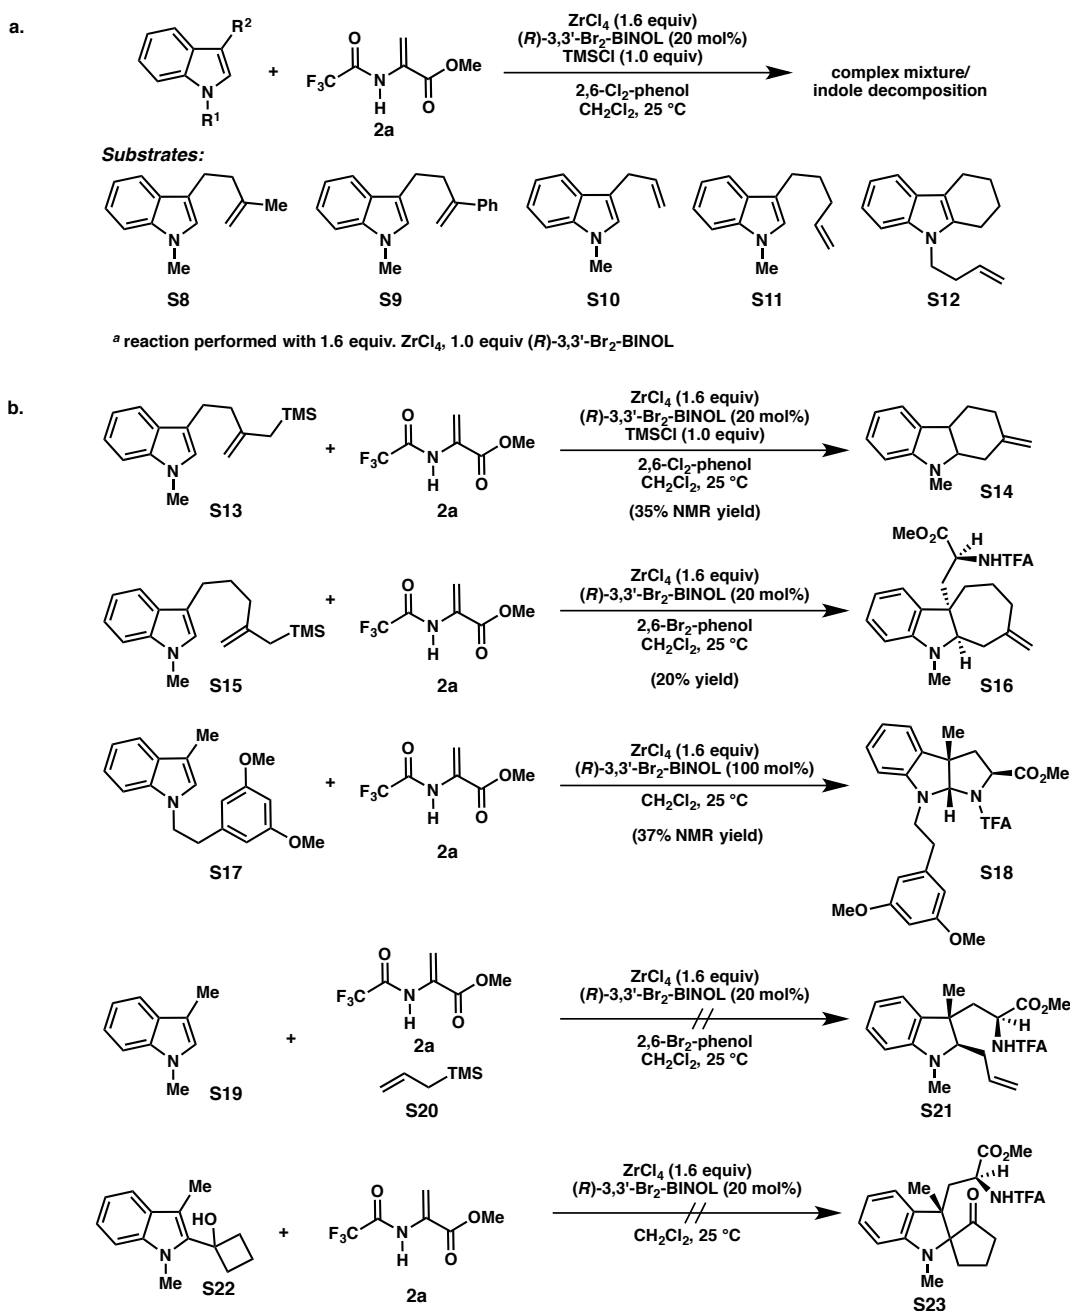

Several substrates with alternative tether structures were synthesized. When exposed to the conditions for the conjugate addition/Prins cyclization, many formed complex mixtures of products (Scheme S1). However, some substrates underwent competing reaction mechanisms. For example, the allylsilane moiety of indole **S13** facilitates cyclization such that it occurs at a faster rate than conjugate



addition, and the observed product results from protonation of the indole followed by cyclization. On the other hand, a small amount of the desired product was formed from allylsilane substrate **S15**, likely because cyclization to form the seven-membered ring is slower than the six-membered ring analogue (**S16** vs. **S14**). Friedel–Crafts substrate **S17** failed to undergo cyclization by the aryl ring, forming pyrroloindoline **S18** instead. Intermolecular allylsilane trapping to provide **S21** failed, as did an intramolecular Prins-pinacol rearrangement to afford **S23**.

## References

- (1) Still, W. C.; Kahn, M.; Mitra, A. *J. Org. Chem.* **1978**, *43*, 2923.
- (2) Youn, S.W.; Pastine, S.J.; Sames, D. *Org. Lett.* **2004**, 581.
- (3) Liu, C. and Widenhoefer, R. A. *J. Am. Chem. Soc.* **2004**, *126*, 10250.
- (4) *Ibid.*
- (5) Jørgensen, M. *et. al. Angew. Chem. Int. Ed.* **2008**, *47*, 888.
- (6) *Ibid.*
- (7) Quancard, J. and Trost, B. M. *J. Am. Chem. Soc.* **2006**, *128*, 6314.
- (8) Imm, S. *et. al. Chem Eur. J.* **2010**, *16*, 2705.
- (9) Siddiki, S. M. A. H.; Kon, K.; and Shimizu, K. *Chem. Eur. J.* **2013**, *19*, 14416.
- (10) Zhang, L. *et. al. Tetrahedron Lett.* **2015**, *56*, 1703.

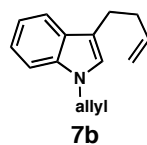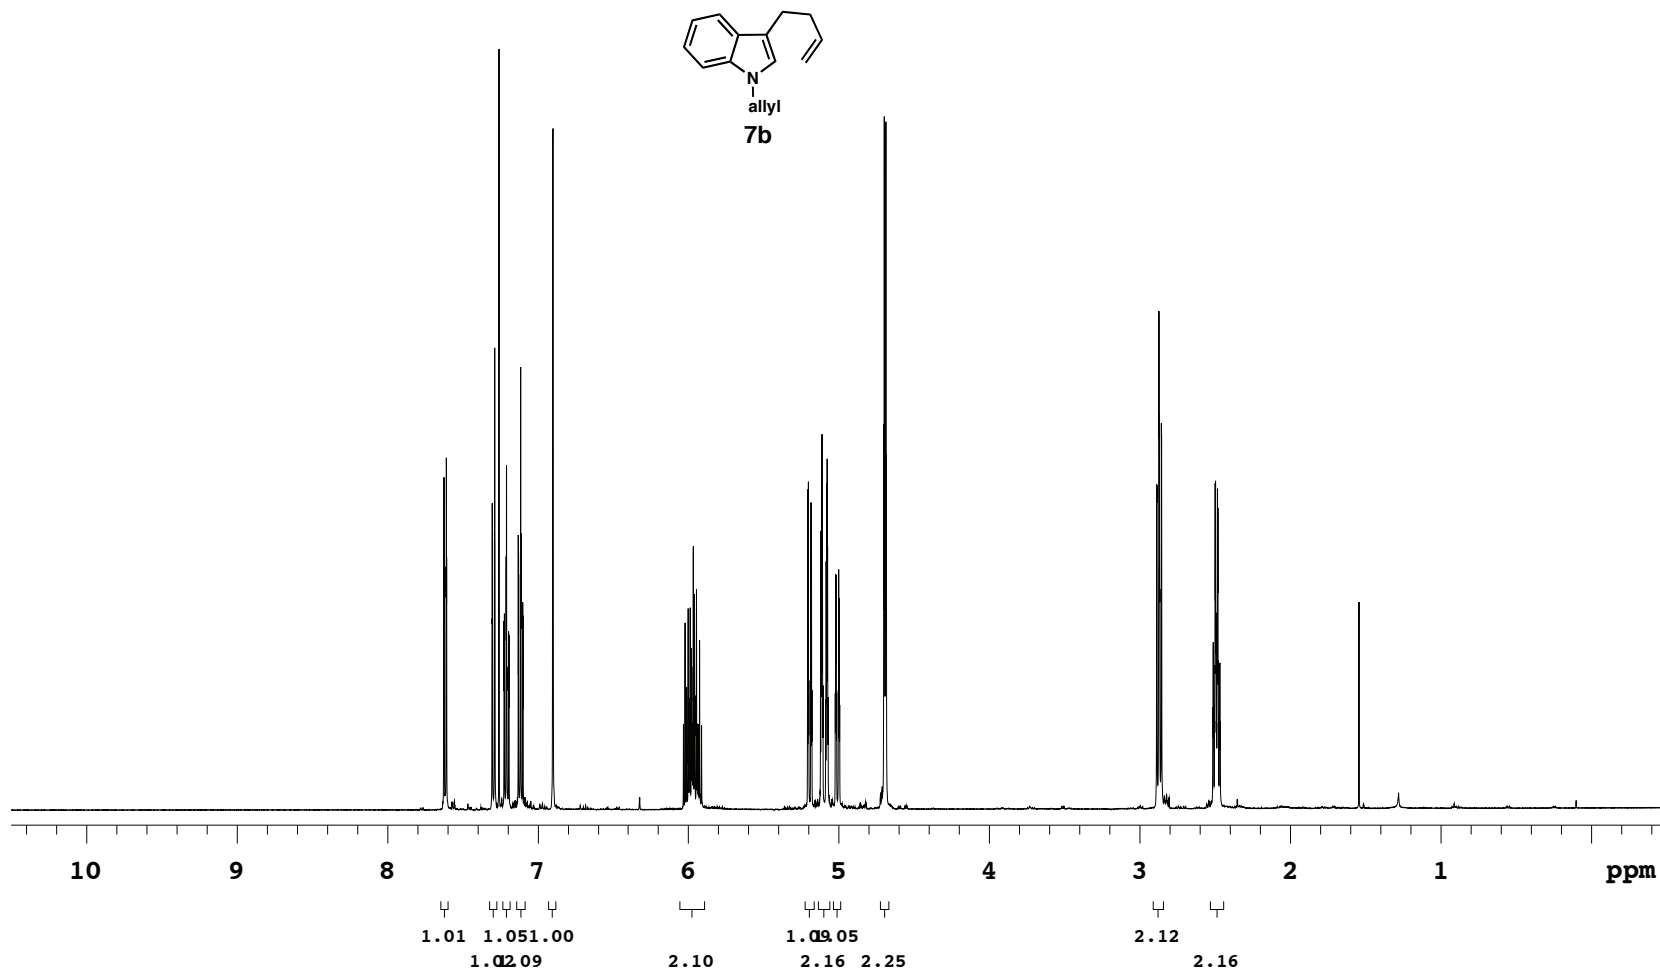

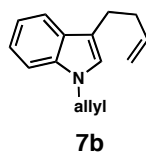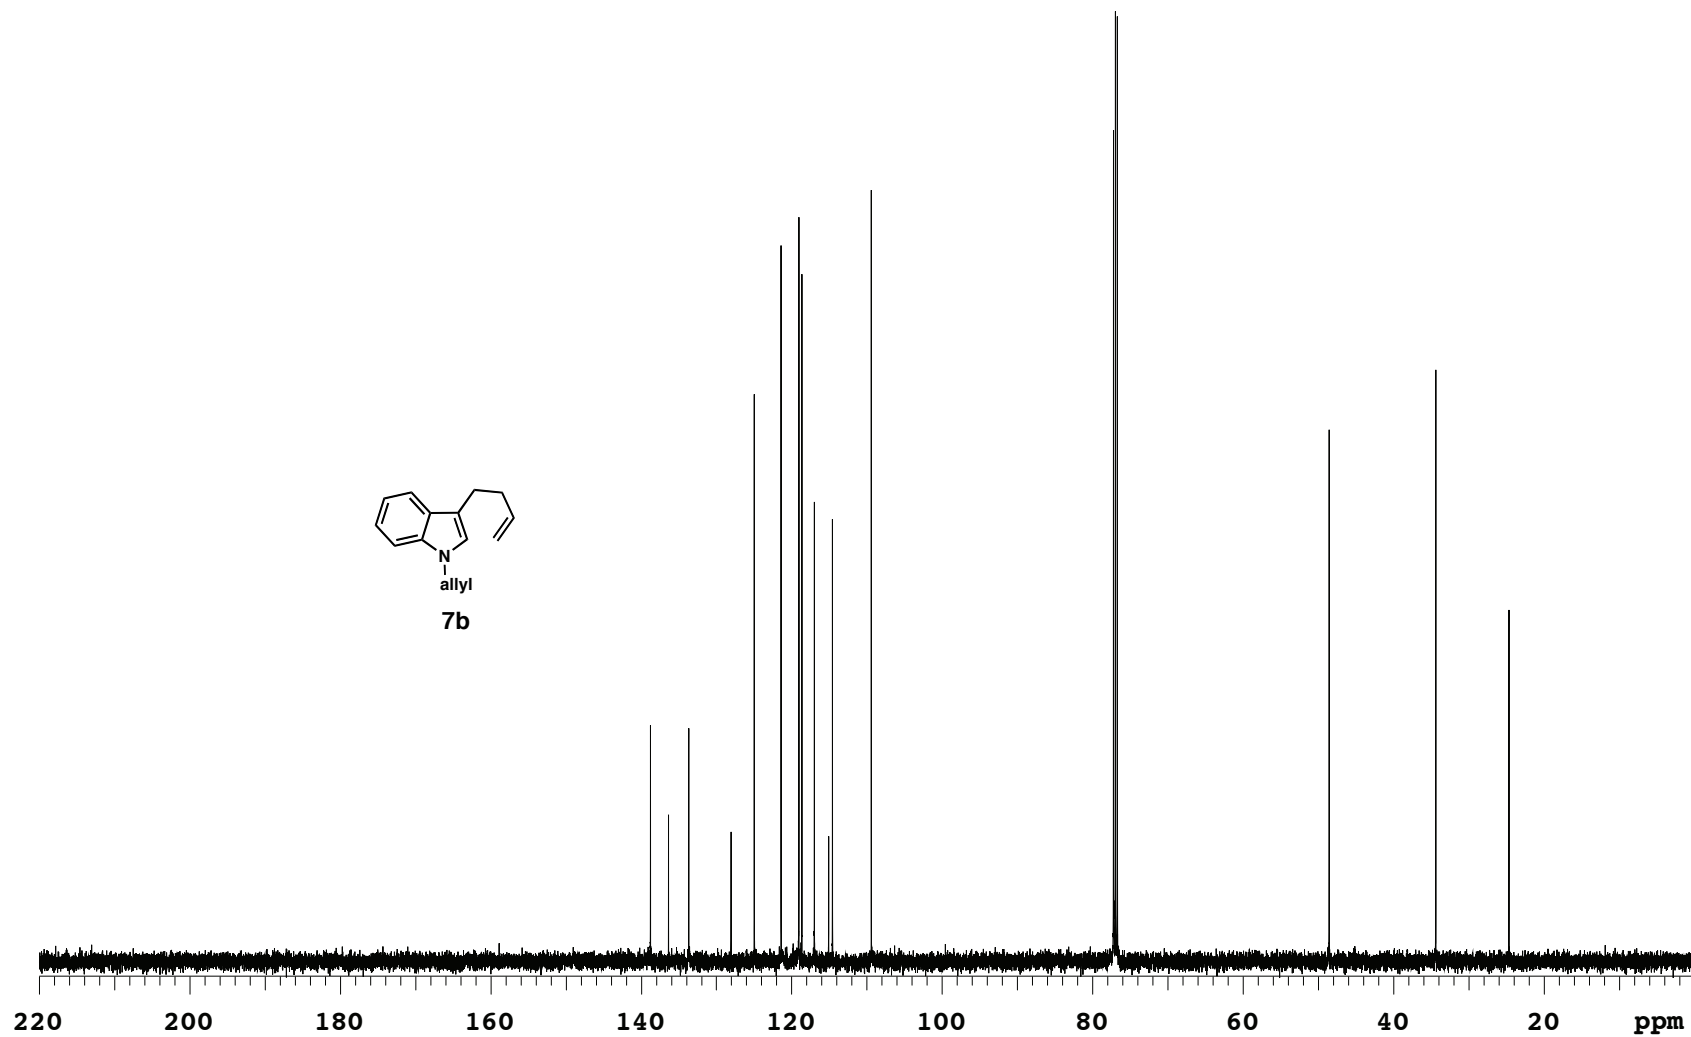

Current Data Parameters  
NAME BED2-86-char  
EXPNO 1  
PROCNO 1

F2 - Acquisition Parameters  
Date\_ 20150608  
Time 16.33  
INSTRUM spect  
PROBHD 5 mm CPPBBO BB  
PULPROG zg30  
TD 65536  
SOLVENT CDCl3  
NS 16  
DS 2  
SWH 8012.820 Hz  
FIDRES 0.122266 Hz  
AQ 4.0894465 sec  
RG 12.68  
DW 62.400 usec  
DE 10.00 usec  
TE 295.0 K  
D1 1.00000000 sec  
TDO 1

==== CHANNEL f1 =====  
SFO1 400.1324710 MHz  
NUC1 1H  
P1 11.70 usec  
PLW1 7.00000000 W

F2 - Processing parameters  
SI 65536  
SF 400.1300095 MHz  
WDW EM  
SSB 0  
LB 0.30 Hz  
GB 0  
PC 1.00

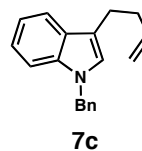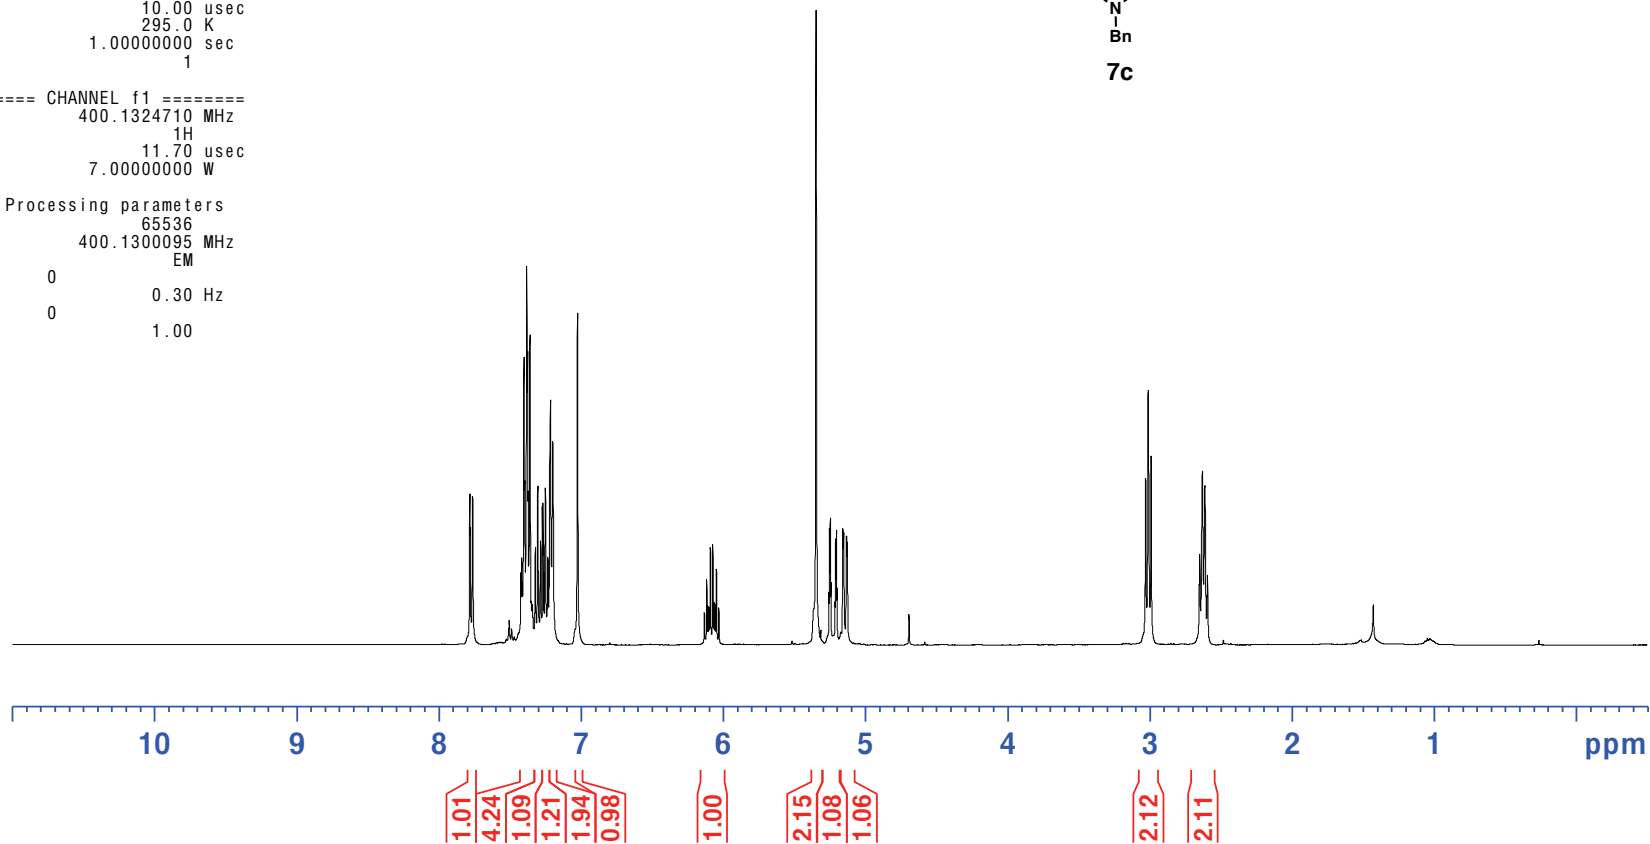

Current Data Parameters  
NAME BED2-86-cha  
EXPNO 2  
PROCNO 1

F2 - Acquisition Parameters  
Date\_ 20150608  
Time 16.41  
INSTRUM spect  
PROBHD 5 mm CPPBBO BB  
PULPROG zgpg30  
TD 65536  
SOLVENT CDCl3  
NS 128  
DS 2  
SWH 24038.461 Hz  
FIDRES 0.366798 Hz  
AQ 1.3631488 sec  
RG 50.33  
DW 20.800 usec  
DE 82.37 usec  
TE 294.9 K  
D1 2.0000000 sec  
D11 0.0300000 sec  
TD0 3

==== CHANNEL f1 =====  
SF01 100.6228298 MHz  
NUC1 13C  
P1 10.00 usec  
PLW1 36.0000000 W

==== CHANNEL f2 =====  
SF02 400.1316005 MHz  
NUC2 1H  
CPDPRG[2] waltz16  
PCPD2 90.00 usec  
PLW2 7.0000000 W  
PLW12 0.1203300 W  
PLW13 0.09746800 W

F2 - Processing parameters  
SI 32768  
SF 100.6127685 MHz  
WDW EM  
SSB 0  
LB 1.00 Hz  
GB 0  
PC 1.40

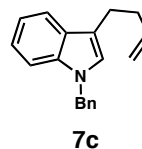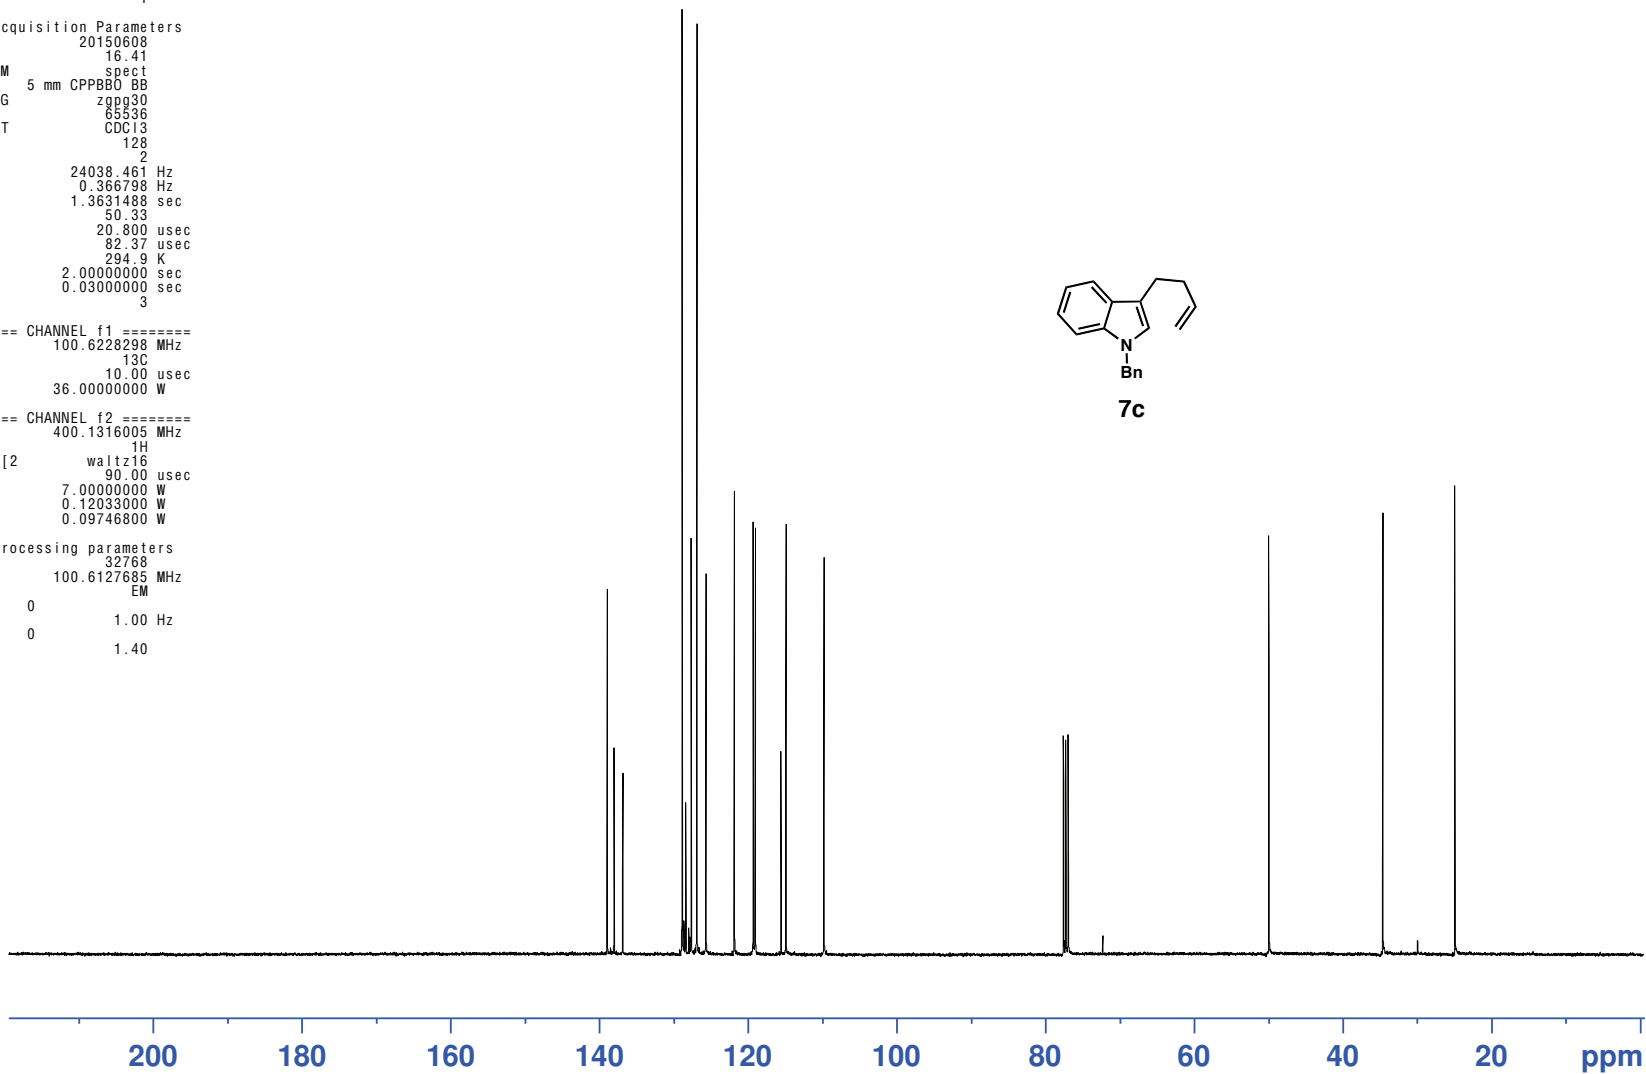

Current Data Parameters  
NAME JN-4-301A-char  
EXPNO 1  
PROCNO 1

F2 - Acquisition Parameters  
Date\_ 20150604  
Time 15.01  
INSTRUM spect  
PROBHD 5 mm CPPBBO BB  
PULPROG zg30  
TD 65536  
SOLVENT CDCl3  
NS 16  
DS 2  
SWH 8012.820 Hz  
FIDRES 0.122266 Hz  
AQ 4.0894465 sec  
RG 197.44  
DW 62.400 usec  
DE 10.00 usec  
TE 295.0 K  
D1 1.00000000 sec  
TD0 1

==== CHANNEL f1 =====  
SF01 400.1324710 MHz  
NUC1 1H  
P1 11.70 usec  
PLW1 7.00000000 W

F2 - Processing parameters  
SI 65536  
SF 400.1300099 MHz  
WDW EM  
SSB 0  
LB 0.30 Hz  
GB 0  
PC 1.00

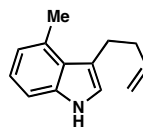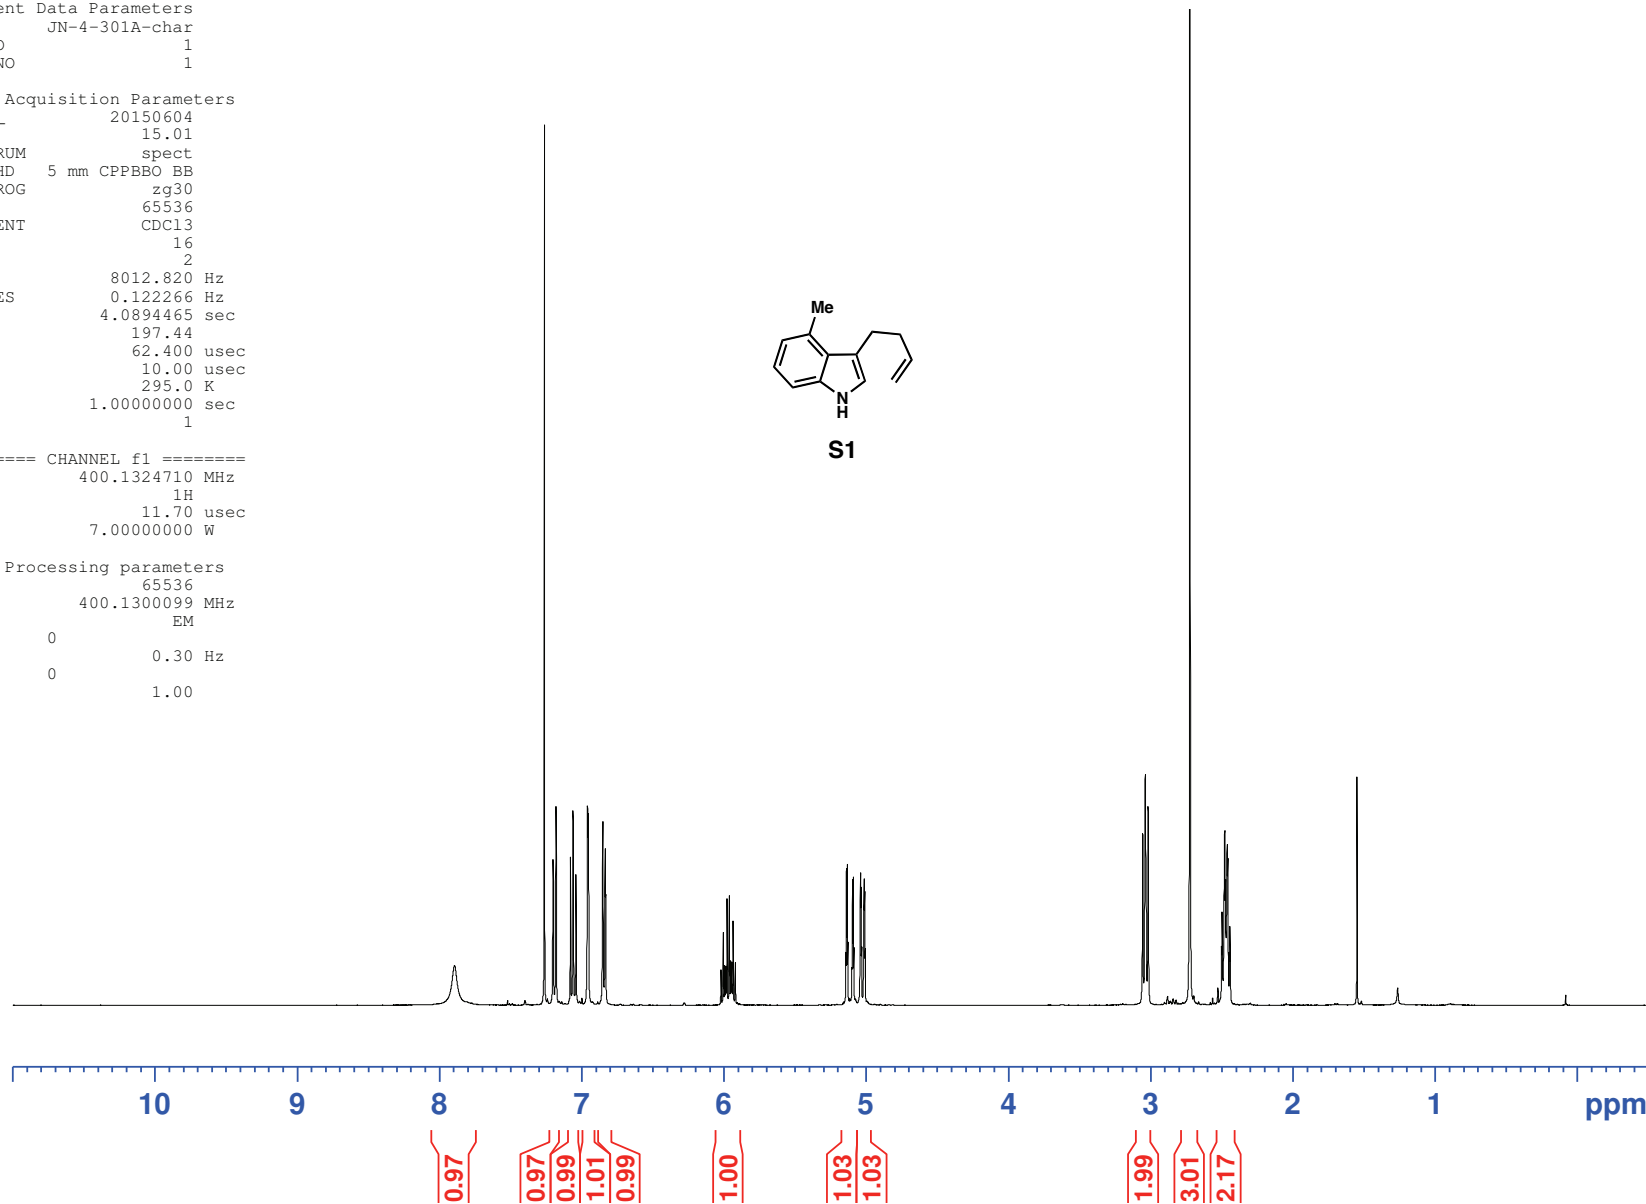

```

Current Data Parameters
NAME      JN-4-301A-char
EXPNO     2
PROCNO    1

F2 - Acquisition Parameters
Date_     20150604
Time      15.09
INSTRUM   spect
PROBHD    5 mm CPPBBO BB
PULPROG   zgpg30
TD         65536
SOLVENT   CDCl3
NS         384
DS         2
SWH        24038.461 Hz
FIDRES     0.366798 Hz
AQ         1.3631488 sec
RG         78.69
DW         20.800 usec
DE         82.37 usec
TE         295.0 K
D1         2.0000000 sec
D11        0.0300000 sec
TD0        3

===== CHANNEL f1 =====
SFO1      100.6228298 MHz
NUC1       13C
P1         10.00 usec
PLW1       36.0000000 W

===== CHANNEL f2 =====
SFO2      400.1316005 MHz
NUC2       1H
CPDPRG[2] waltz16
PCPD2      90.00 usec
PLW2       7.0000000 W
PLW12      0.1203300 W
PLW13      0.09746800 W

F2 - Processing parameters
SI         32768
SF         100.6127685 MHz
WDW        EM
SSB        0
LB         1.00 Hz
GB         0
PC         1.40

```

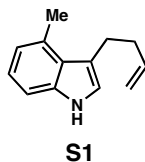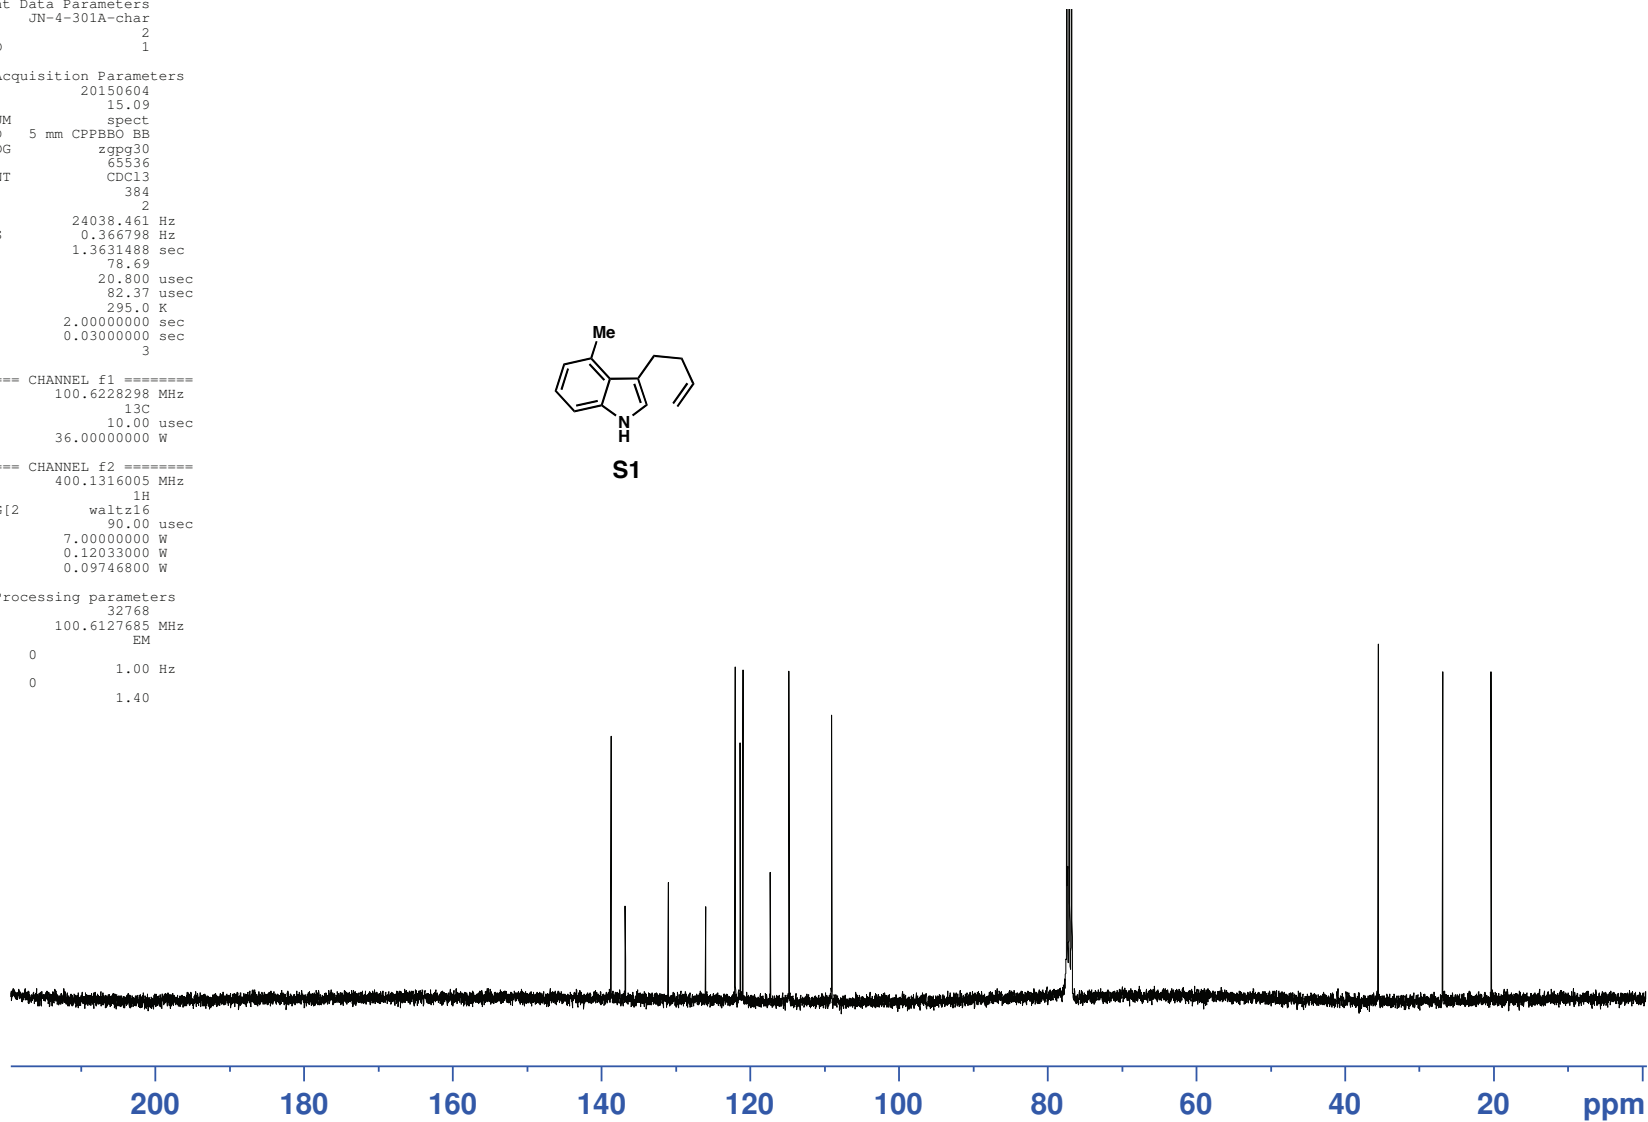



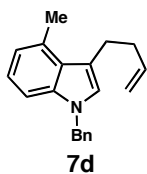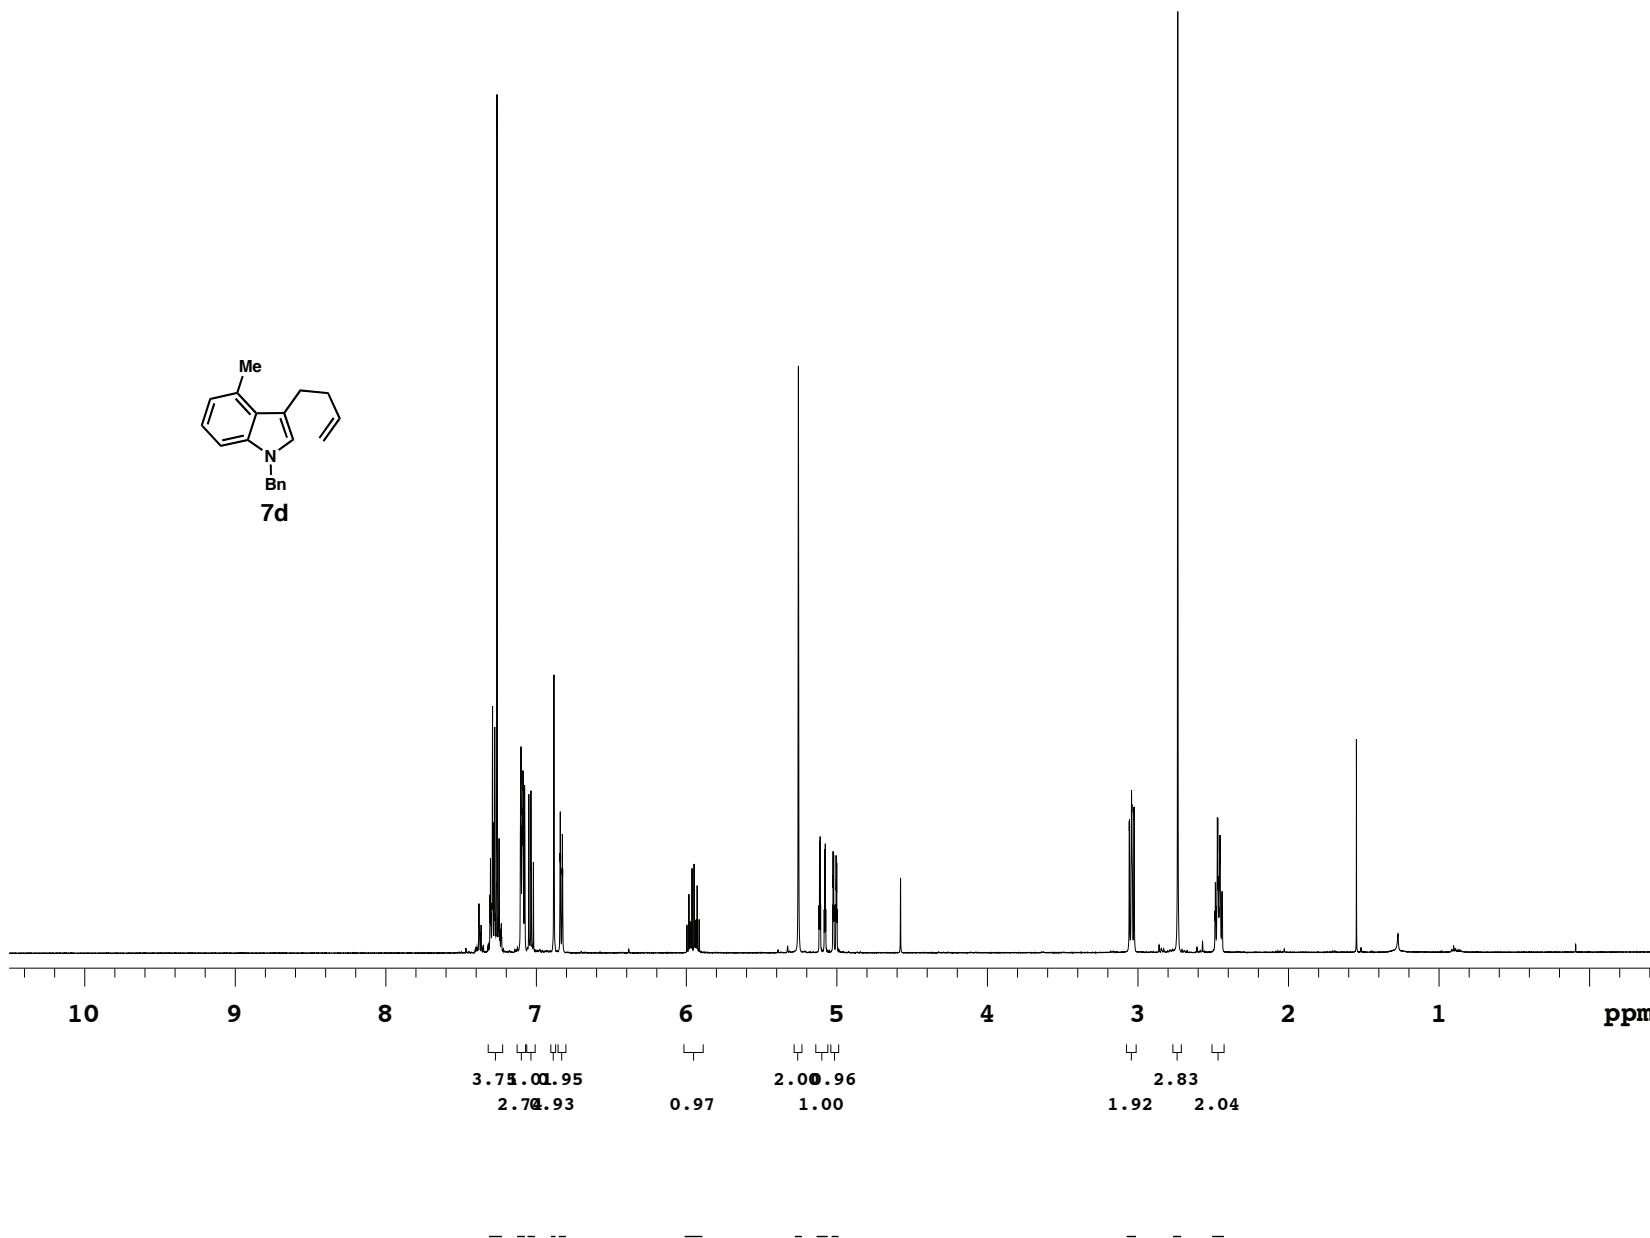

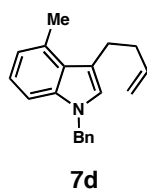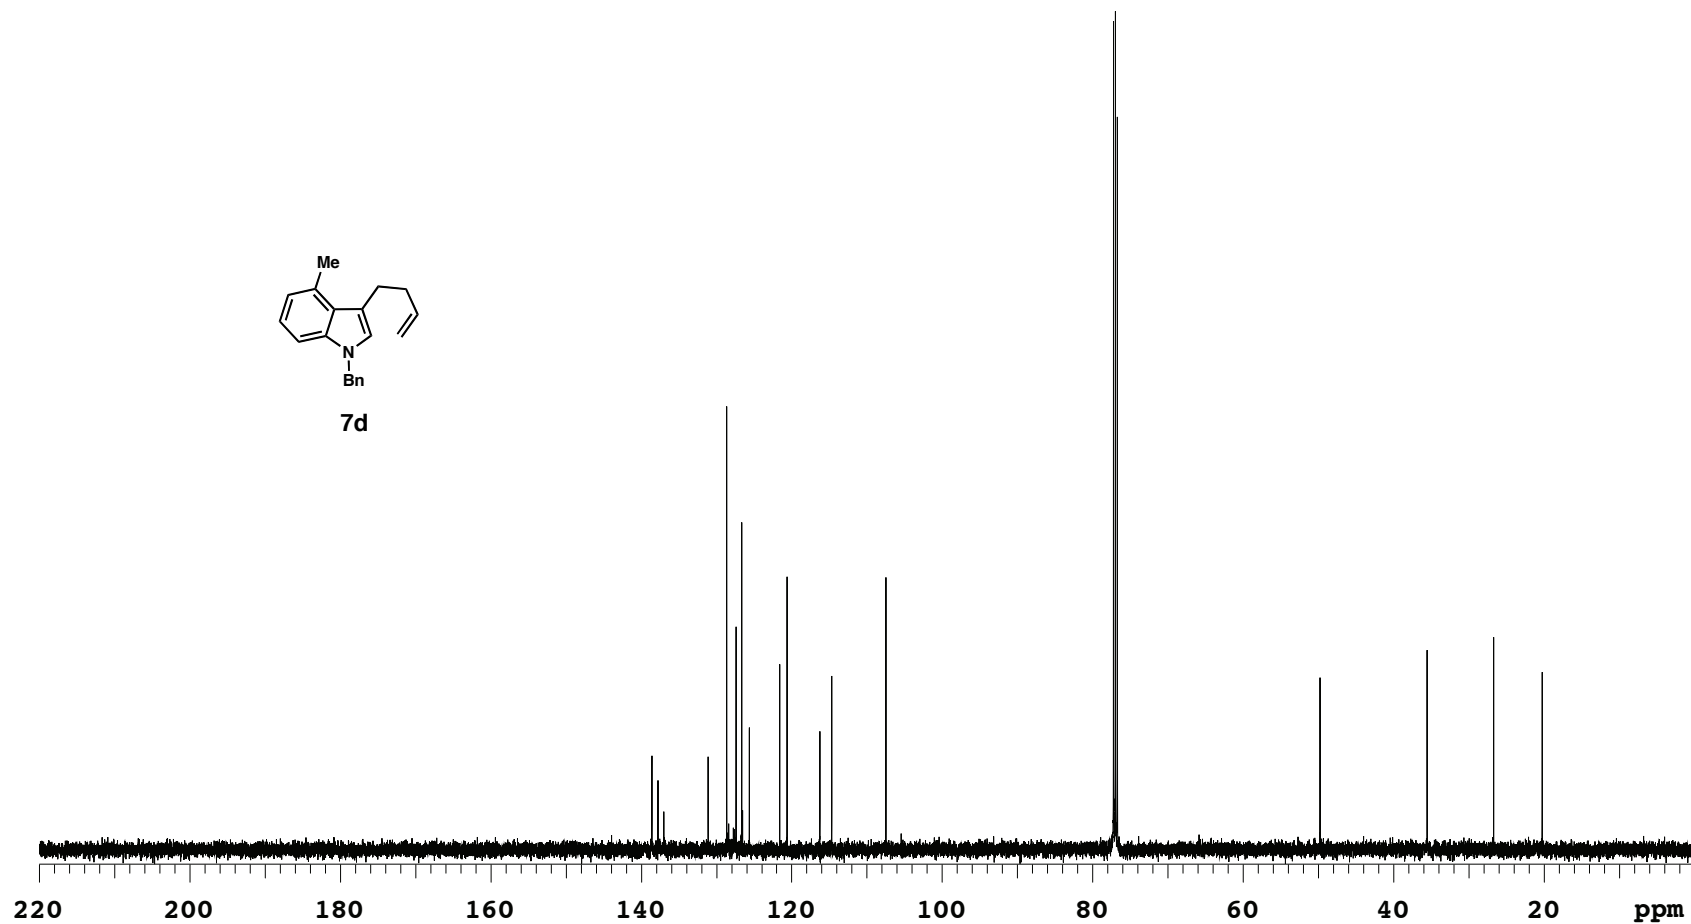

BED2-87char

Sample Name **BED2-87char**  
Date collected **2015-06-10**

Pulse sequence **PROTON**  
Solvent **cdcl3**

Temperature **25**  
Spectrometer **-vnmrs400**

Study owner **bdaniels**  
Operator **autouser**

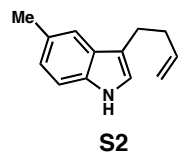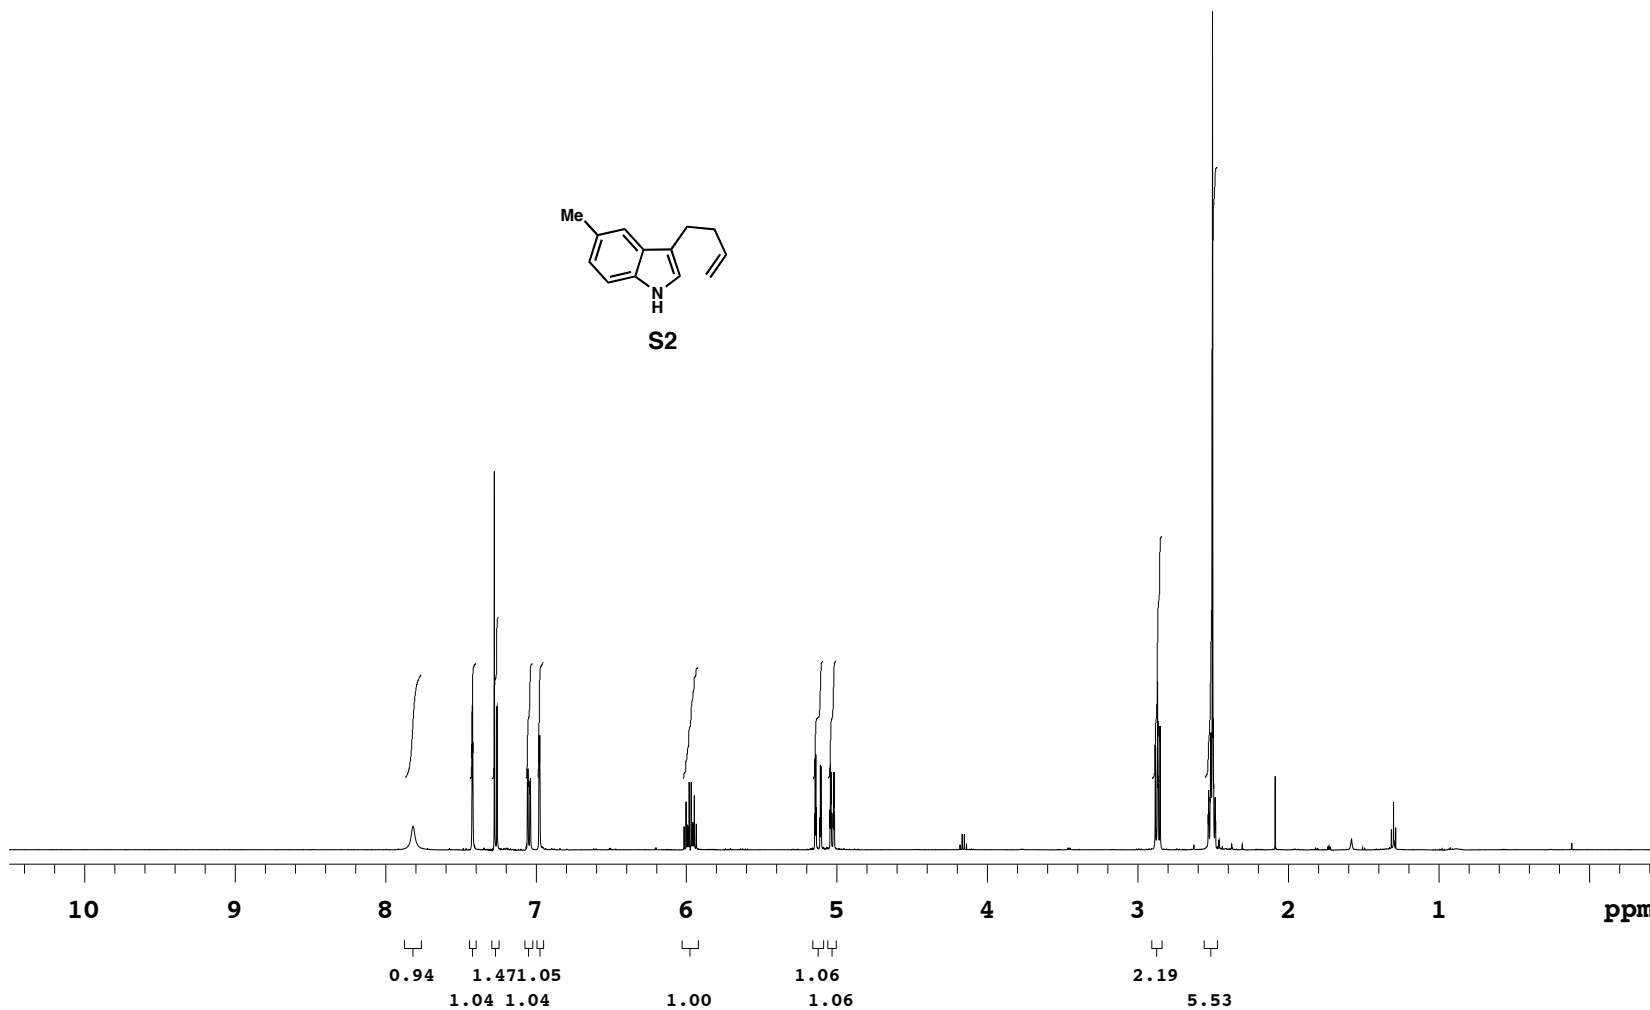

BED2-87char

Sample Name **BED2-87char**  
Date collected **2015-06-10**

Pulse sequence **CARBON**  
Solvent **cdcl3**

Temperature **25**  
Spectrometer **-vnmrs400**

Study owner **bdaniels**  
Operator **autouser**

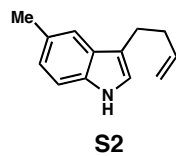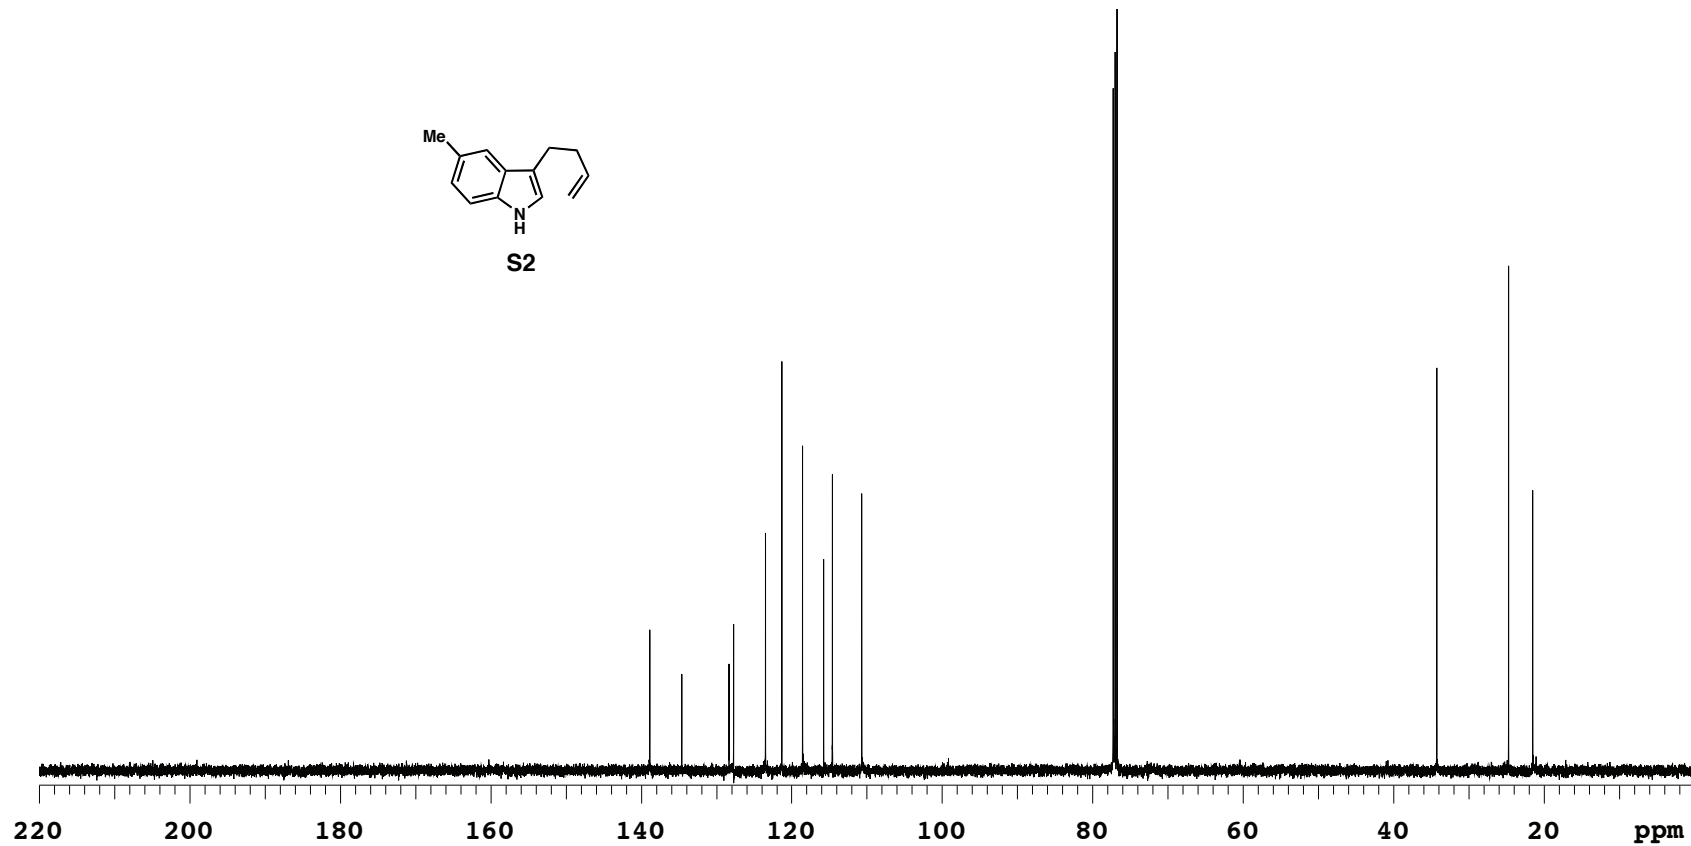

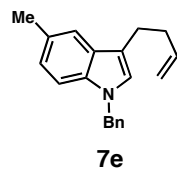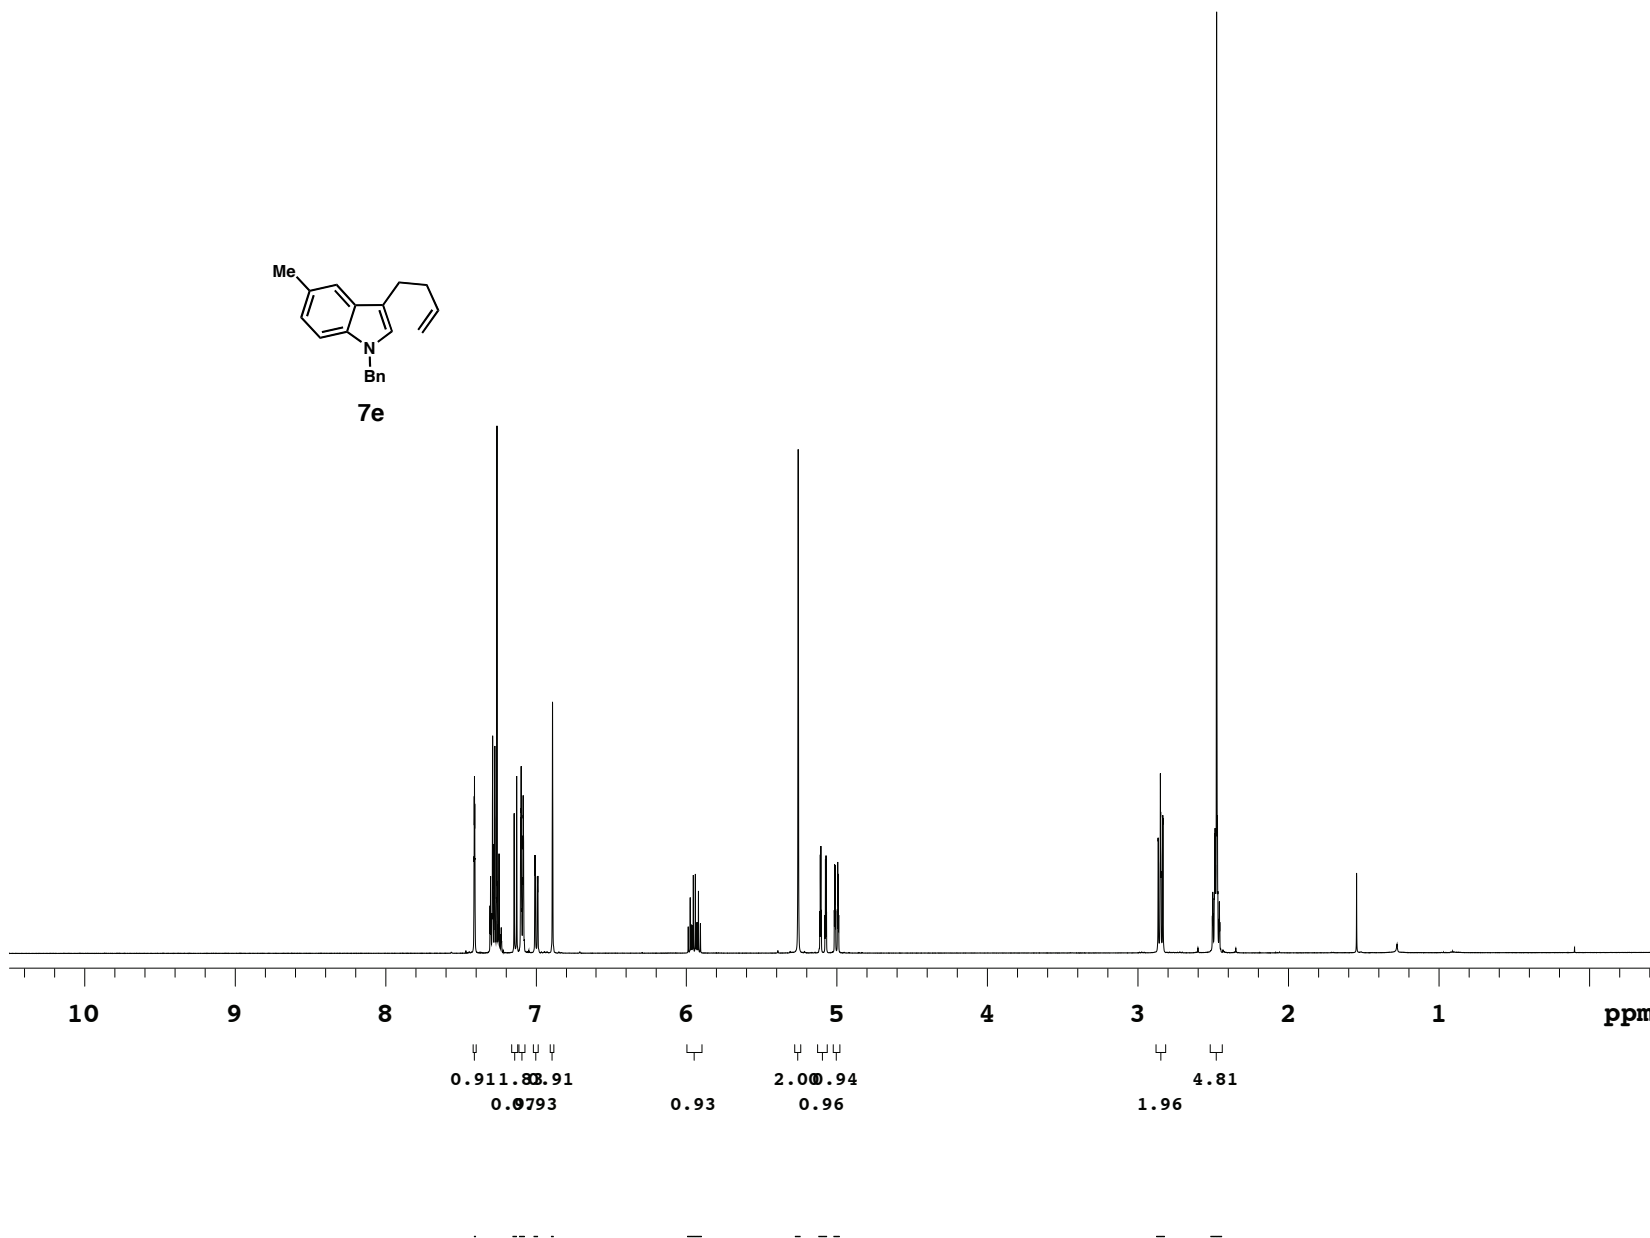

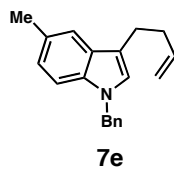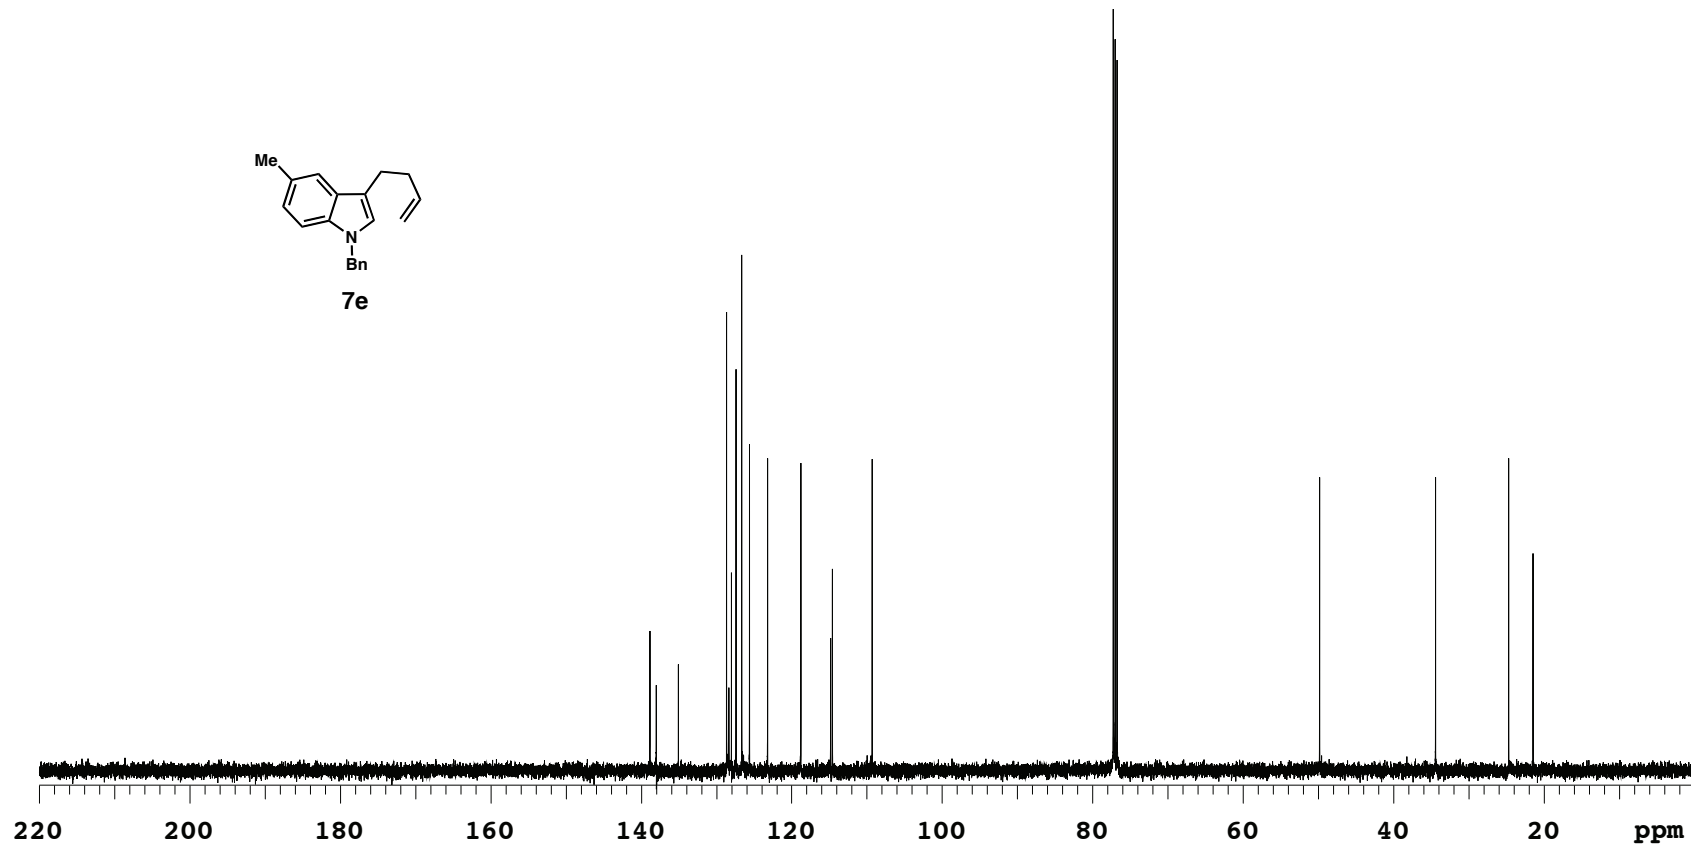

Current Data Parameters  
NAME JN-4-301B-char  
EXPNO 1  
PROCNO 1

F2 - Acquisition Parameters  
Date\_ 20150604  
Time 15.28  
INSTRUM spect  
PROBHD 5 mm CPPBBO BB  
PULPROG zg30  
TD 65536  
SOLVENT CDCl3  
NS 16  
DS 2  
SWH 8012.820 Hz  
FIDRES 0.122266 Hz  
AQ 4.0894465 sec  
RG 98.88  
DW 62.400 usec  
DE 10.00 usec  
TE 295.0 K  
D1 1.0000000 sec  
TD0 1

==== CHANNEL f1 =====  
SFO1 400.1324710 MHz  
NUC1 1H  
P1 11.70 usec  
PLW1 7.0000000 W

F2 - Processing parameters  
SI 65536  
SF 400.1300098 MHz  
WDW EM  
SSB 0  
LB 0.30 Hz  
GB 0  
PC 1.00

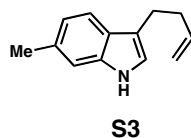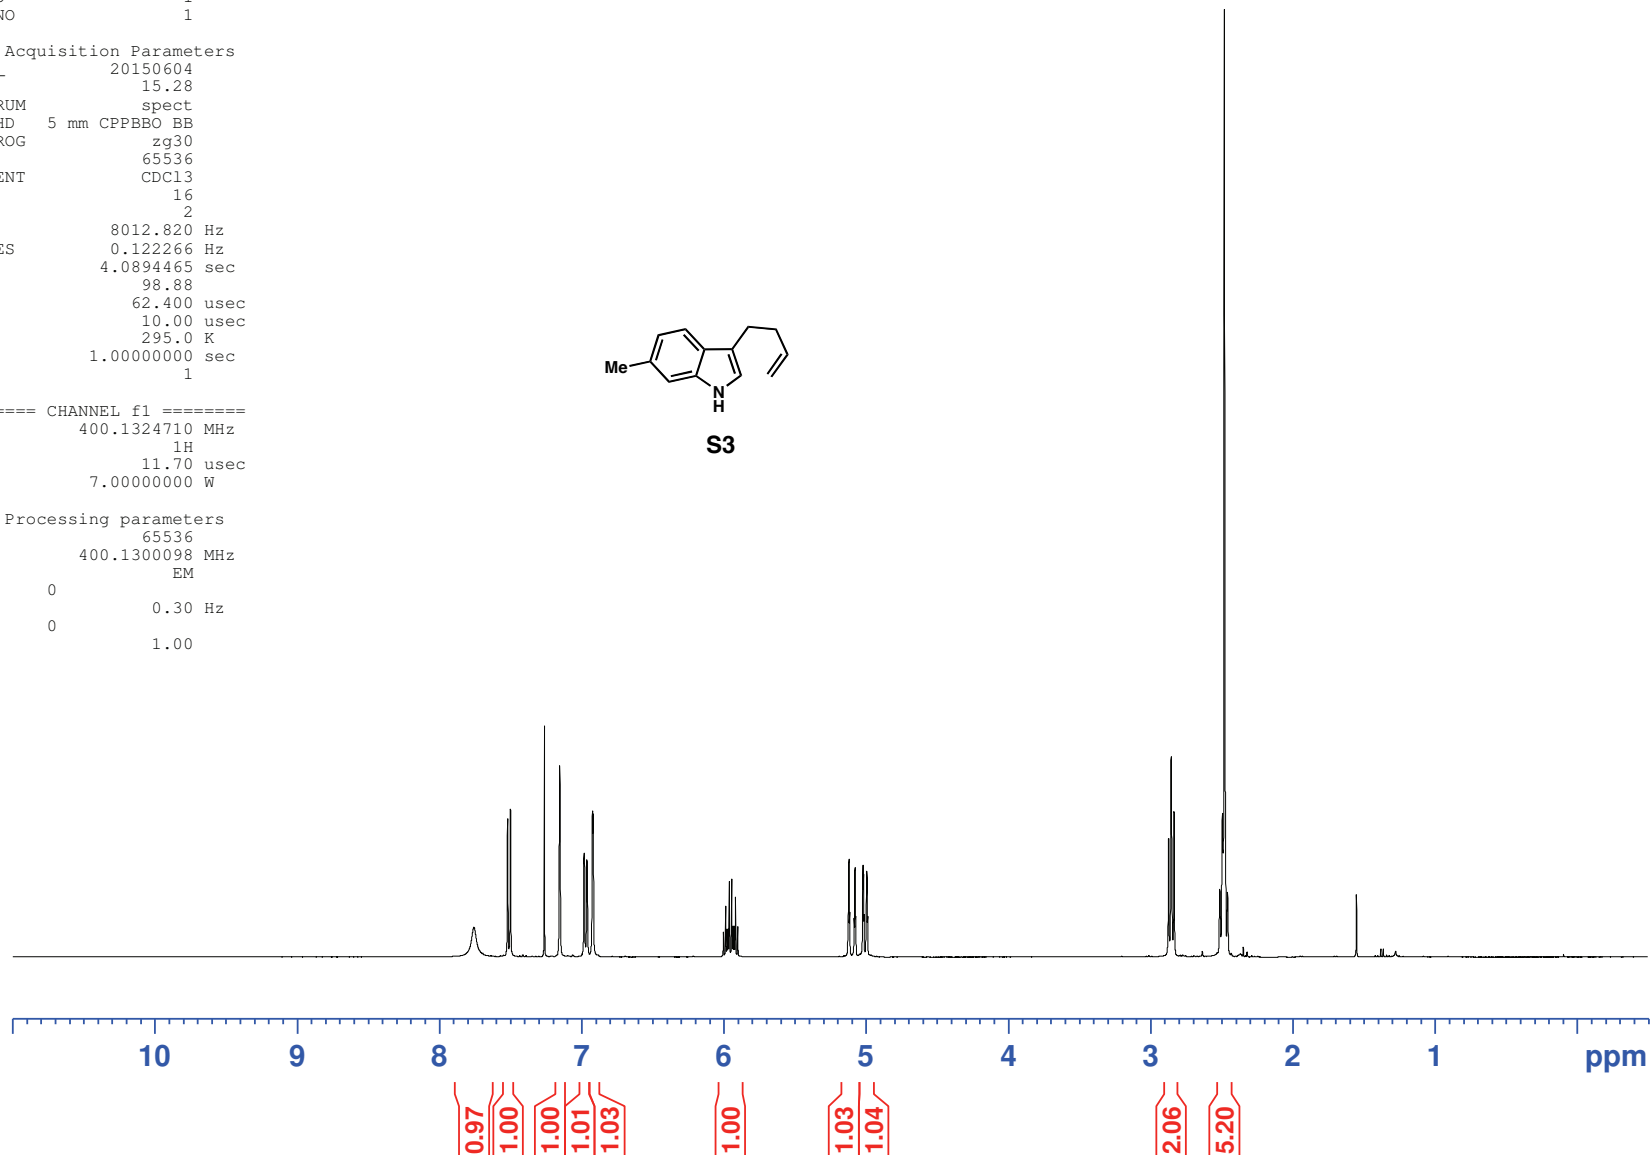

Current Data Parameters  
NAME JN-4-301B-char  
EXPNO 2  
PROCNO 1  
  
F2 - Acquisition Parameters  
Date\_ 20150604  
Time 15.35  
INSTRUM spect  
PROBHD 5 mm CPPBBO BB  
PULPROG zgpg30  
TD 65536  
SOLVENT CDCl3  
NS 384  
DS 2  
SWH 24038.461 Hz  
FIDRES 0.366798 Hz  
AQ 1.3631488 sec  
RG 87.75  
DW 20.800 usec  
DE 82.37 usec  
TE 295.0 K  
D1 2.0000000 sec  
D11 0.0300000 sec  
TD0 3

===== CHANNEL f1 =====  
SFO1 100.6228298 MHz  
NUC1 13C  
P1 10.00 usec  
PLW1 36.0000000 W

===== CHANNEL f2 =====  
SFO2 400.1316005 MHz  
NUC2 1H  
CPDPRG[2] waltz16  
PCPD2 90.00 usec  
PLW2 7.0000000 W  
PLW12 0.1203300 W  
PLW13 0.0974680 W

F2 - Processing parameters  
SI 32768  
SF 100.6127685 MHz  
WDW EM  
SSB 0  
LB 1.00 Hz  
GB 0  
PC 1.40

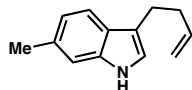

S3

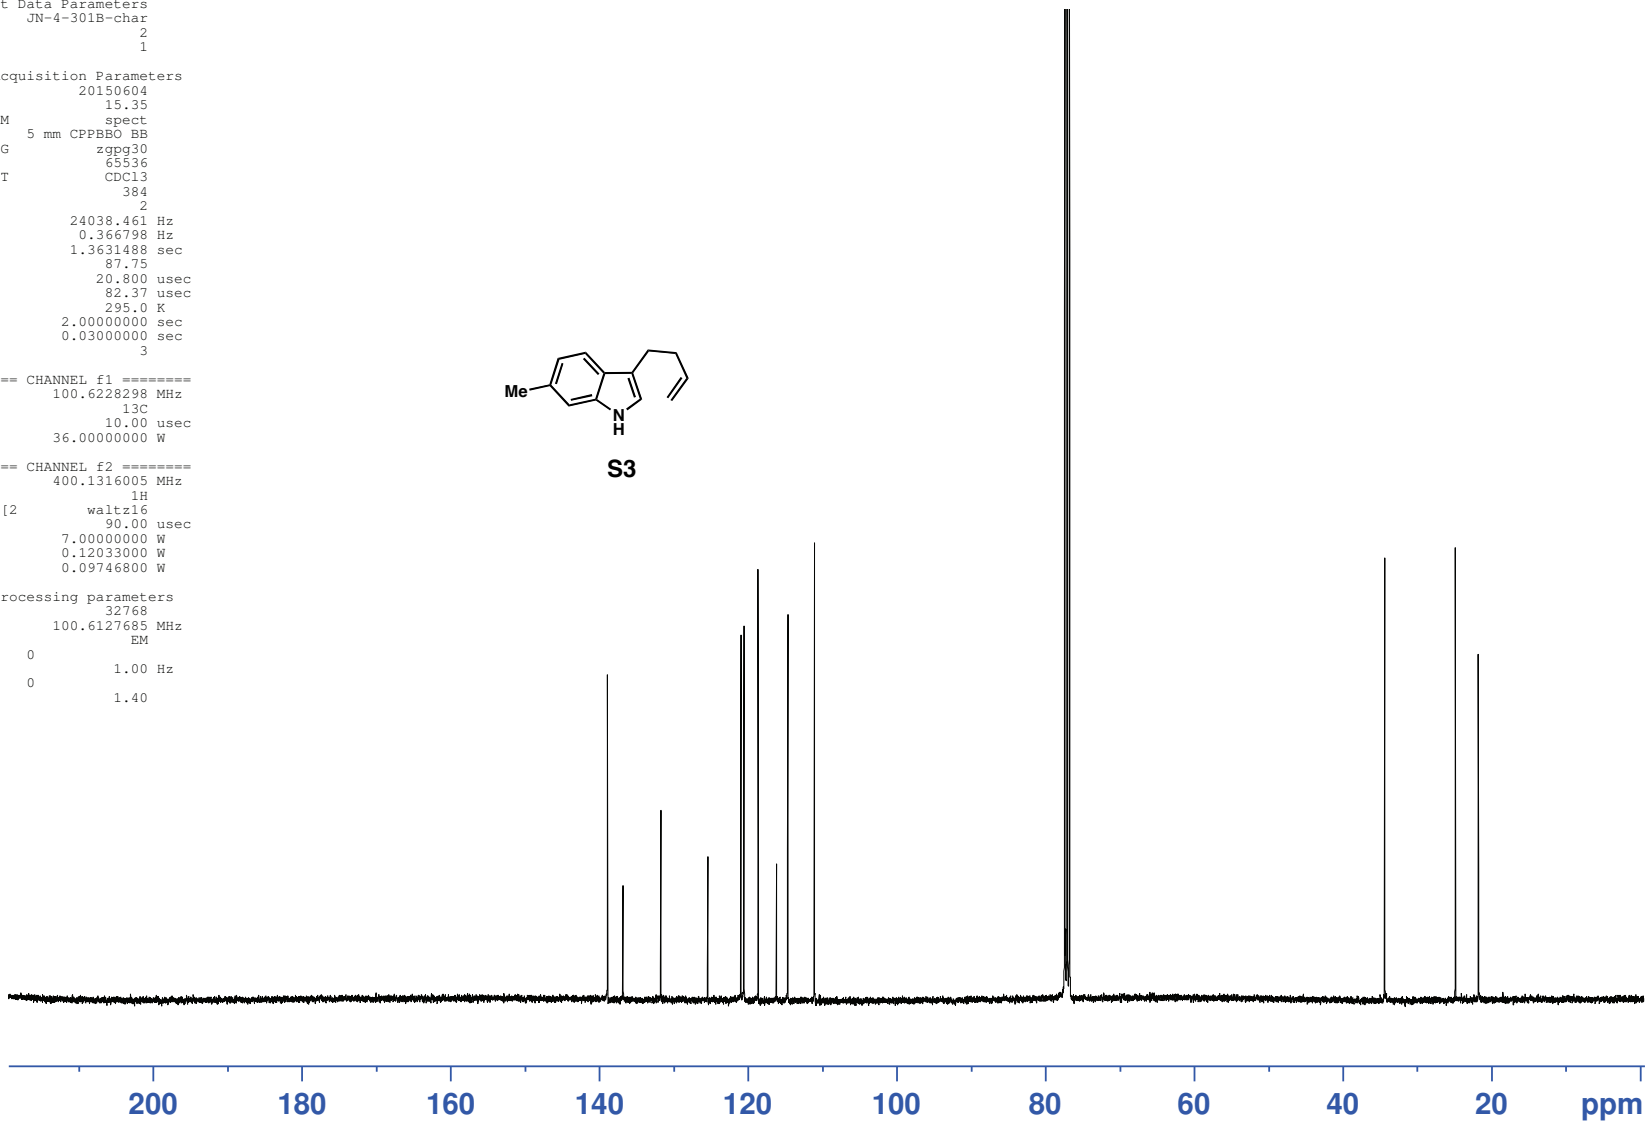



JN-5-013B-char

Sample Name JN-5-013B-char  
Date collected 2015-06-03

Pulse sequence PROTON  
Solvent cdcl3

Temperature 25  
Spectrometer -vnmrs400

Study owner bdaniels  
Operator autouser

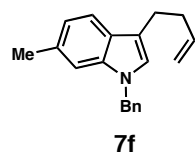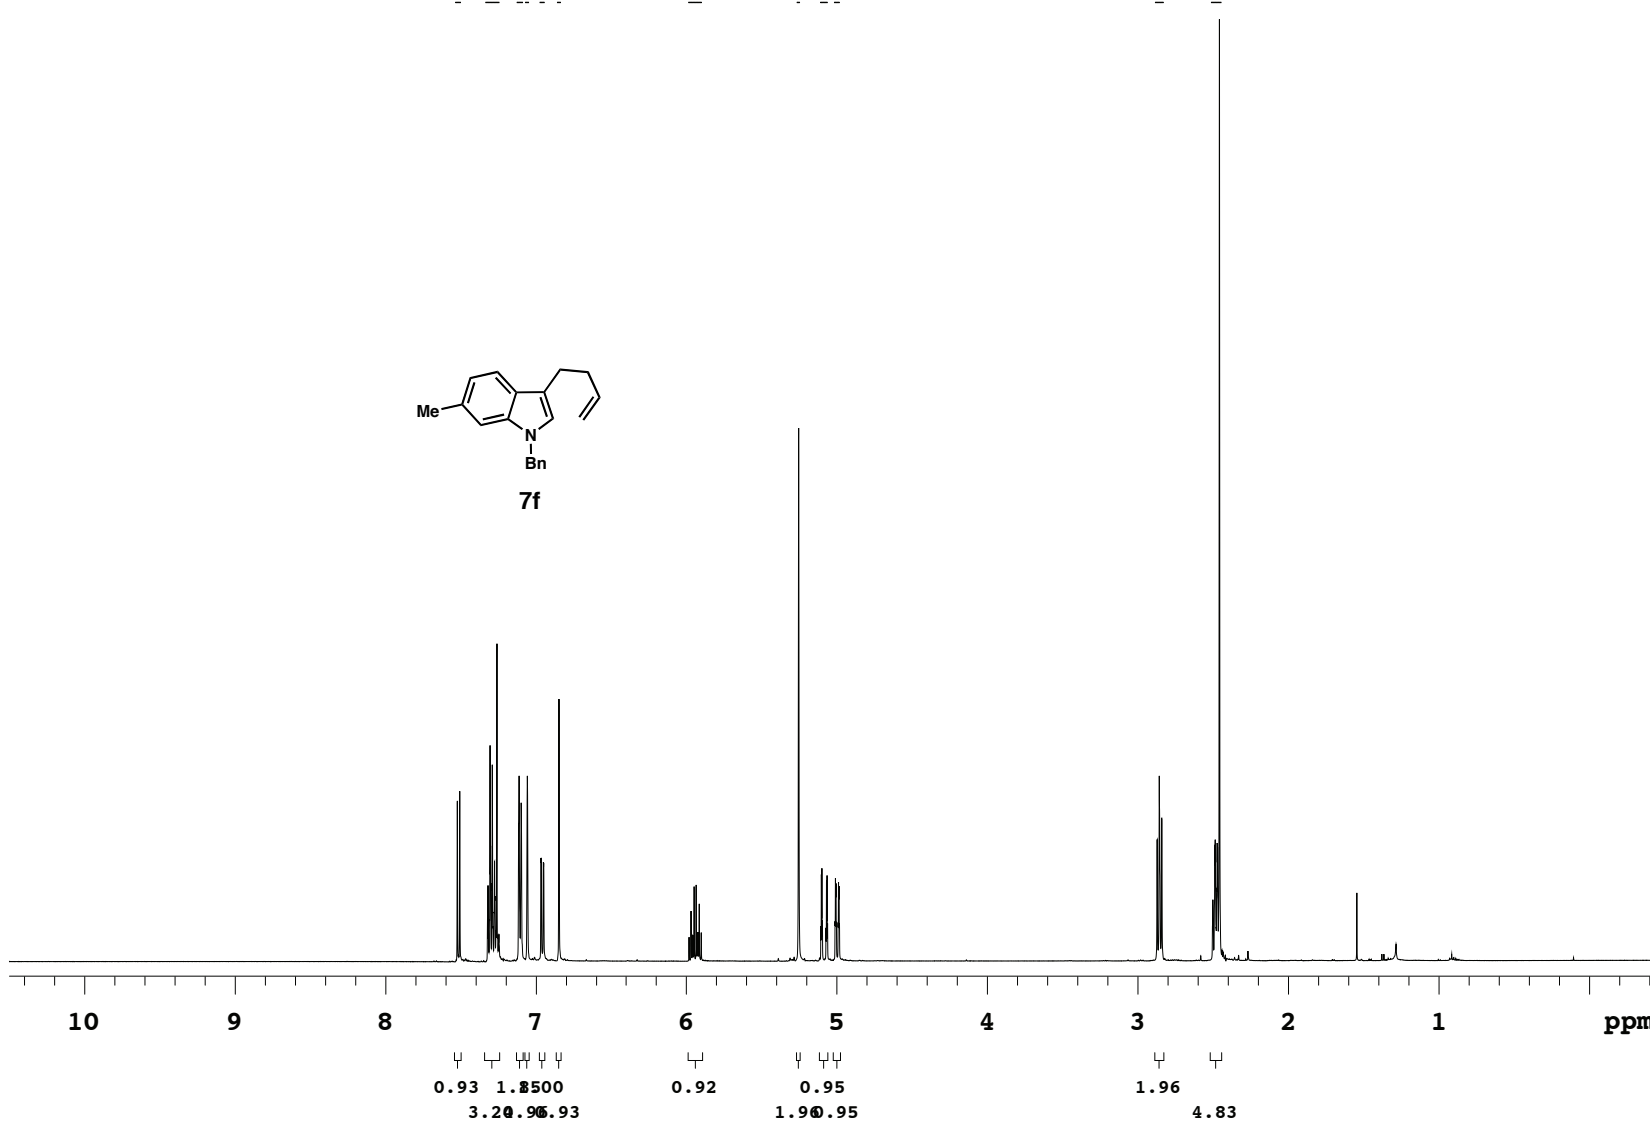

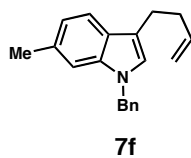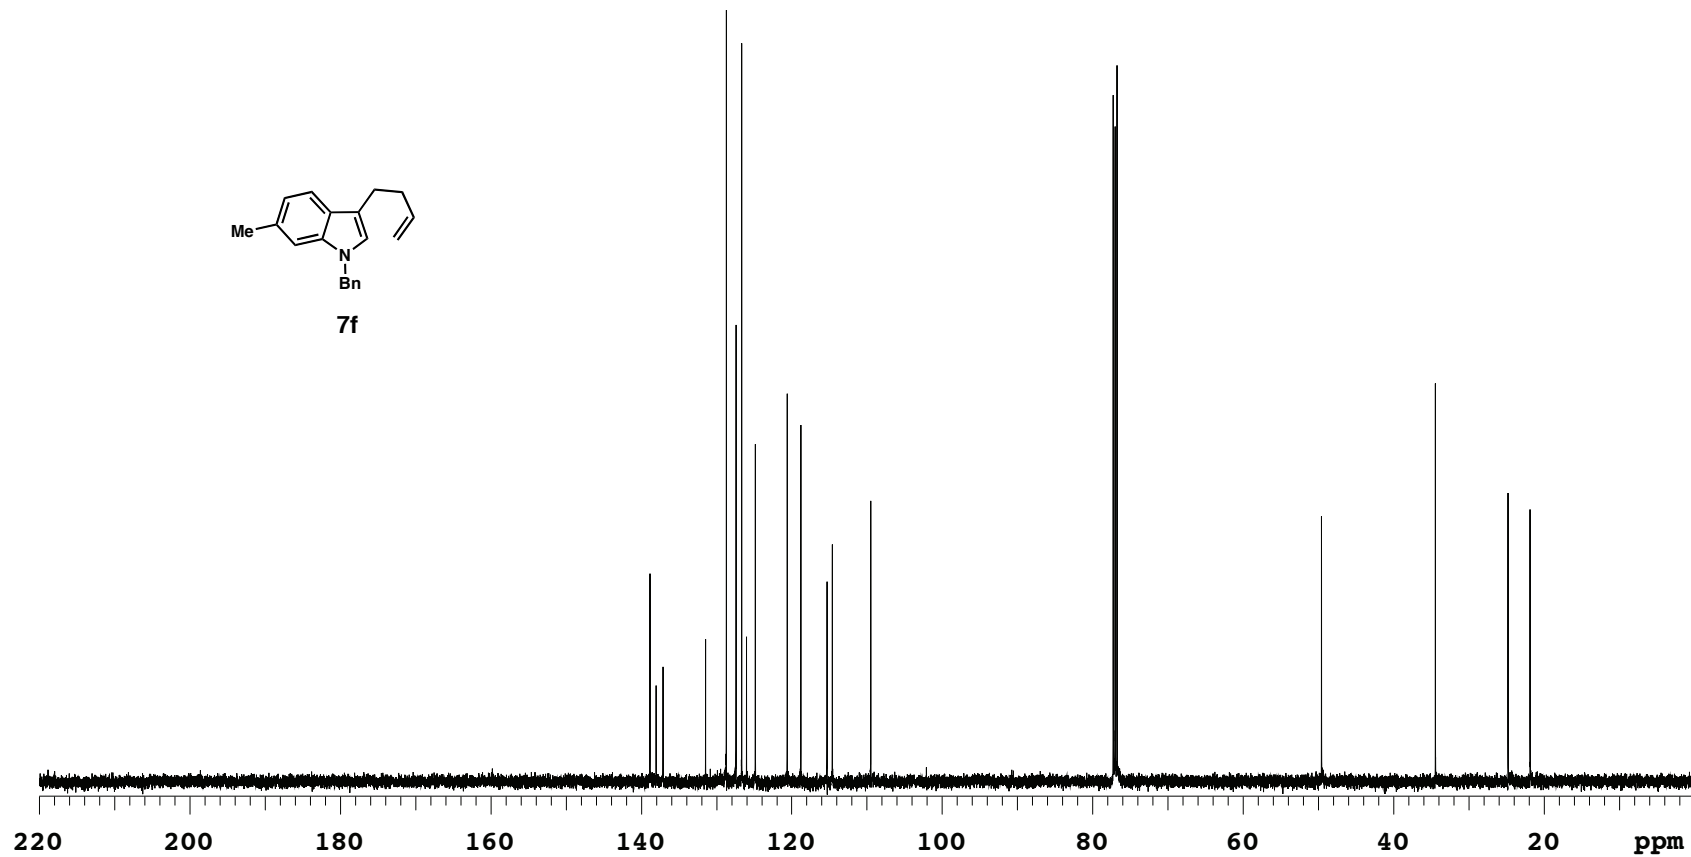

Current Data Parameters  
NAME JN-5-011-char  
EXPNO 1  
PROCNO 1

F2 - Acquisition Parameters  
Date\_ 20150604  
Time 15.55  
INSTRUM spect  
PROBHD 5 mm CPPBBO BB  
PULPROG zg30  
TD 65536  
SOLVENT CDCl3  
NS 16  
DS 2  
SWH 8012.820 Hz  
FIDRES 0.122266 Hz  
AQ 4.0894465 sec  
RG 87.75  
DW 62.400 usec  
DE 10.00 usec  
TE 295.0 K  
D1 1.00000000 sec  
TD0 1

==== CHANNEL f1 =====  
SFO1 400.1324710 MHz  
NUC1 1H  
P1 11.70 usec  
PLW1 7.00000000 W

F2 - Processing parameters  
SI 65536  
SF 400.1300098 MHz  
WDW EM  
SSB 0  
LB 0.30 Hz  
GB 0  
PC 1.00

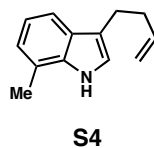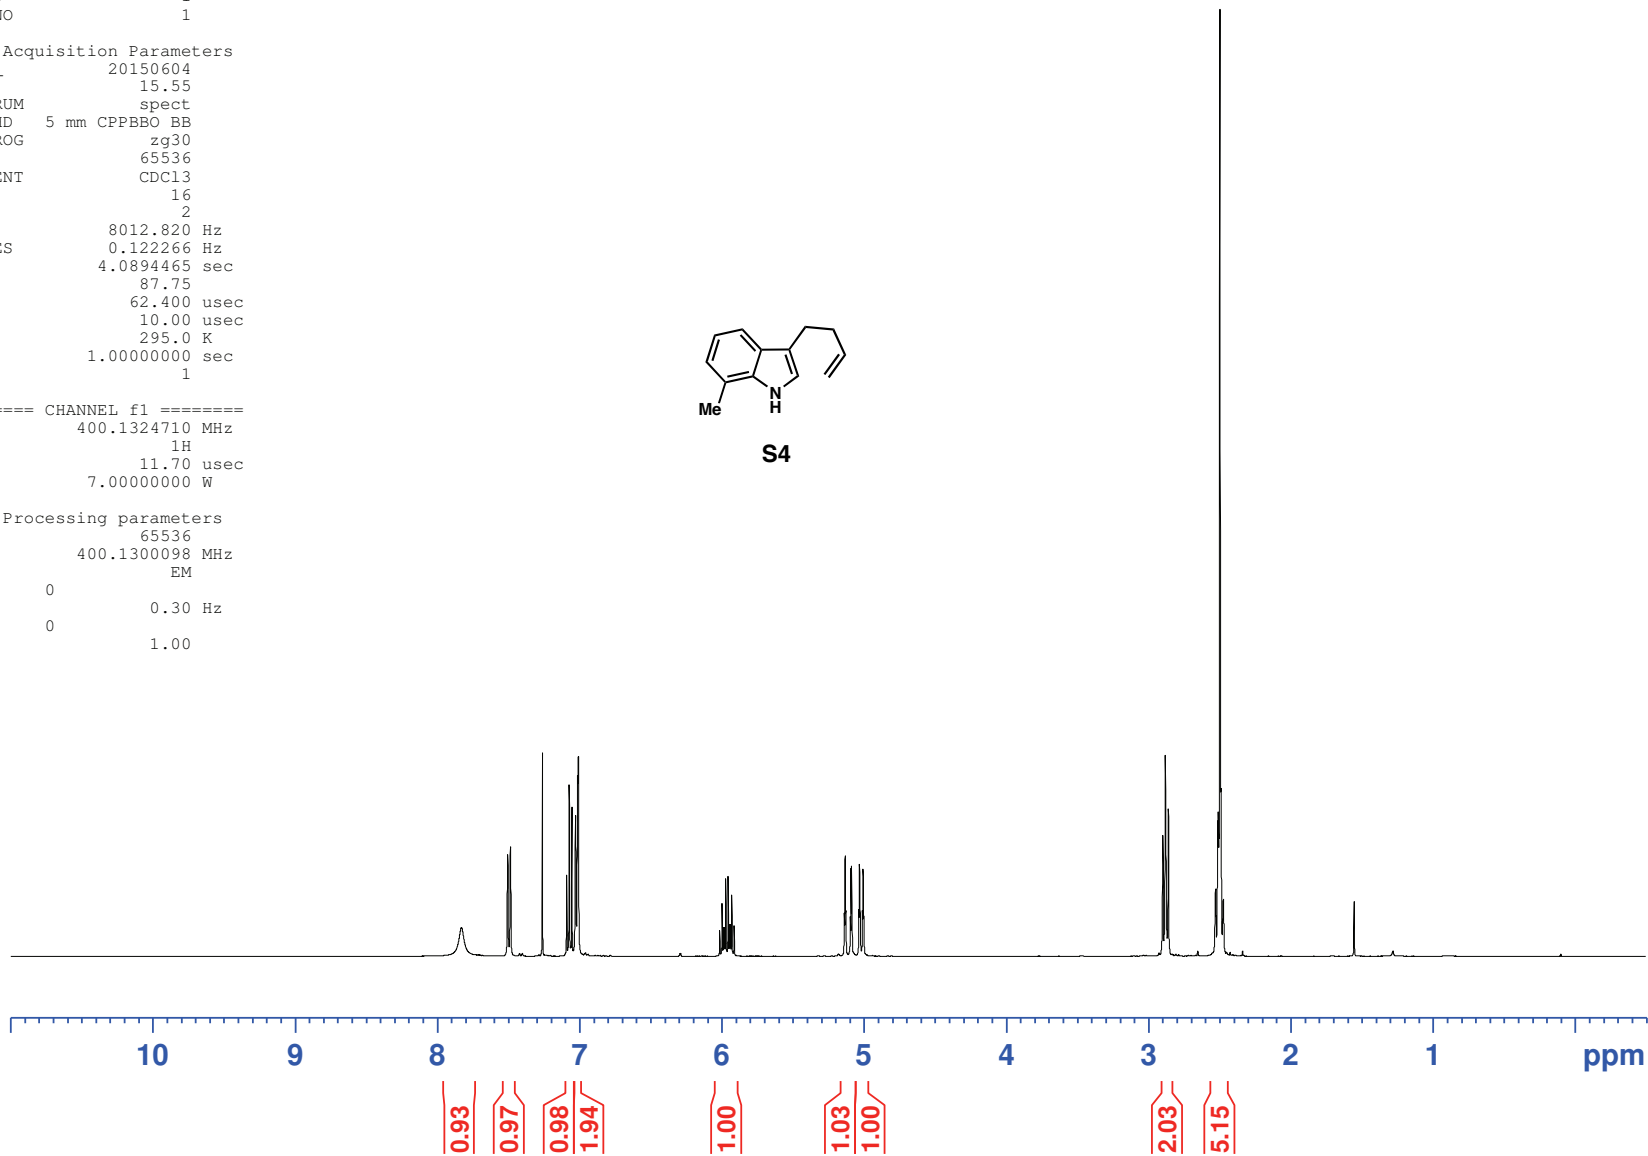

Current Data Parameters  
NAME JN-5-011-char  
EXPNO 2  
PROCNO 1

F2 - Acquisition Parameters  
Date\_ 20150604  
Time 16.02  
INSTRUM spect  
PROBHD 5 mm CPPBBO BB  
PULPROG zgpg30  
TD 65536  
SOLVENT CDCl3  
NS 384  
DS 2  
SWH 24038.461 Hz  
FIDRES 0.366798 Hz  
AQ 1.3631488 sec  
RG 87.75  
DW 20.800 usec  
DE 82.37 usec  
TE 294.9 K  
D1 2.0000000 sec  
D11 0.0300000 sec  
TD0 3

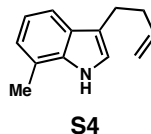

===== CHANNEL f1 =====  
SFO1 100.6228298 MHz  
NUC1 13C  
P1 10.00 usec  
PLW1 36.0000000 W

===== CHANNEL f2 =====  
SFO2 400.1316005 MHz  
NUC2 1H  
CPDPRG[2] waltz16  
PCPD2 90.00 usec  
PLW2 7.0000000 W  
PLW12 0.1203300 W  
PLW13 0.0974680 W

F2 - Processing parameters  
SI 32768  
SF 100.6127685 MHz  
WDW EM  
SSB 0  
LB 1.00 Hz  
GB 0  
PC 1.40

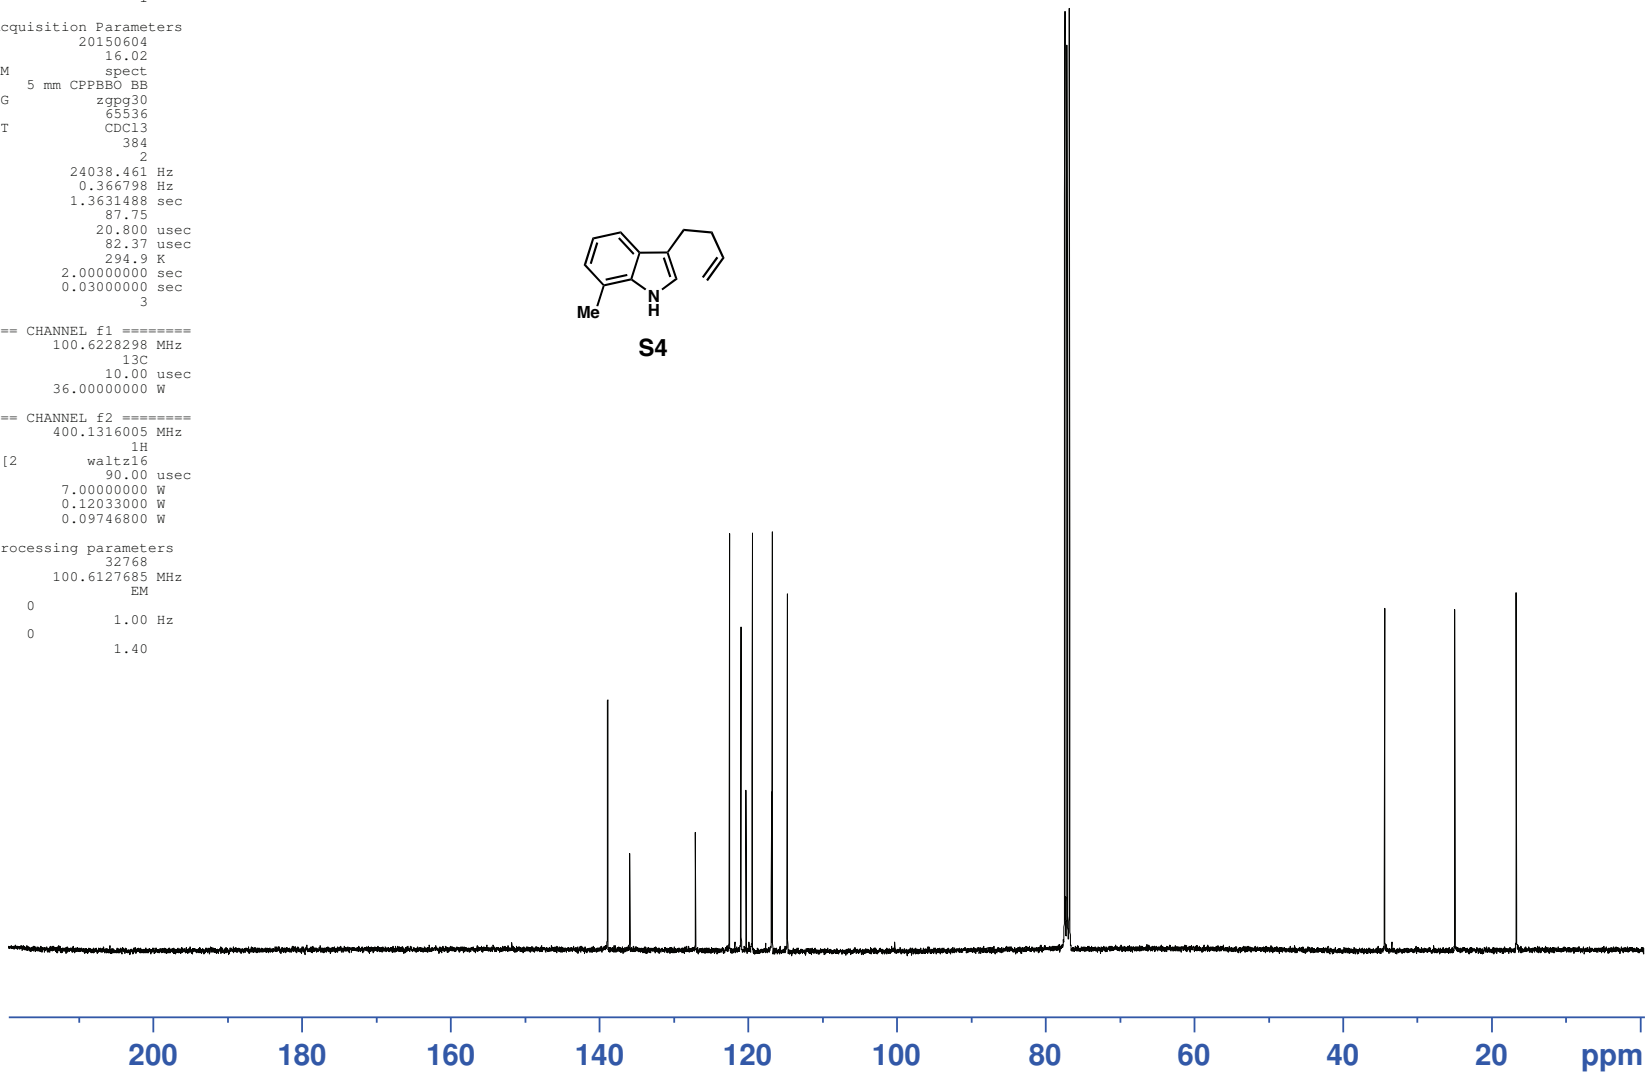

Current Data Parameters  
NAME JN-5-013C-char  
EXPNO 1  
PROCNO 1

F2 - Acquisition Parameters  
Date\_ 20150604  
Time 16.21  
INSTRUM spect  
PROBHD 5 mm CPPBBO BB  
PULPROG zg30  
TD 65536  
SOLVENT CDCl3  
NS 16  
DS 2  
SWH 8012.820 Hz  
FIDRES 0.122266 Hz  
AQ 4.0894465 sec  
RG 98.88  
DW 62.400 usec  
DE 10.00 usec  
TE 295.0 K  
D1 1.00000000 sec  
TD0 1

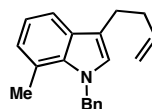

7g

==== CHANNEL f1 =====  
SFO1 400.1324710 MHz  
NUC1 1H  
P1 11.70 usec  
PLW1 7.00000000 W

F2 - Processing parameters  
SI 65536  
SF 400.1300099 MHz  
WDW EM  
SSB 0  
LB 0.30 Hz  
GB 0  
PC 1.00

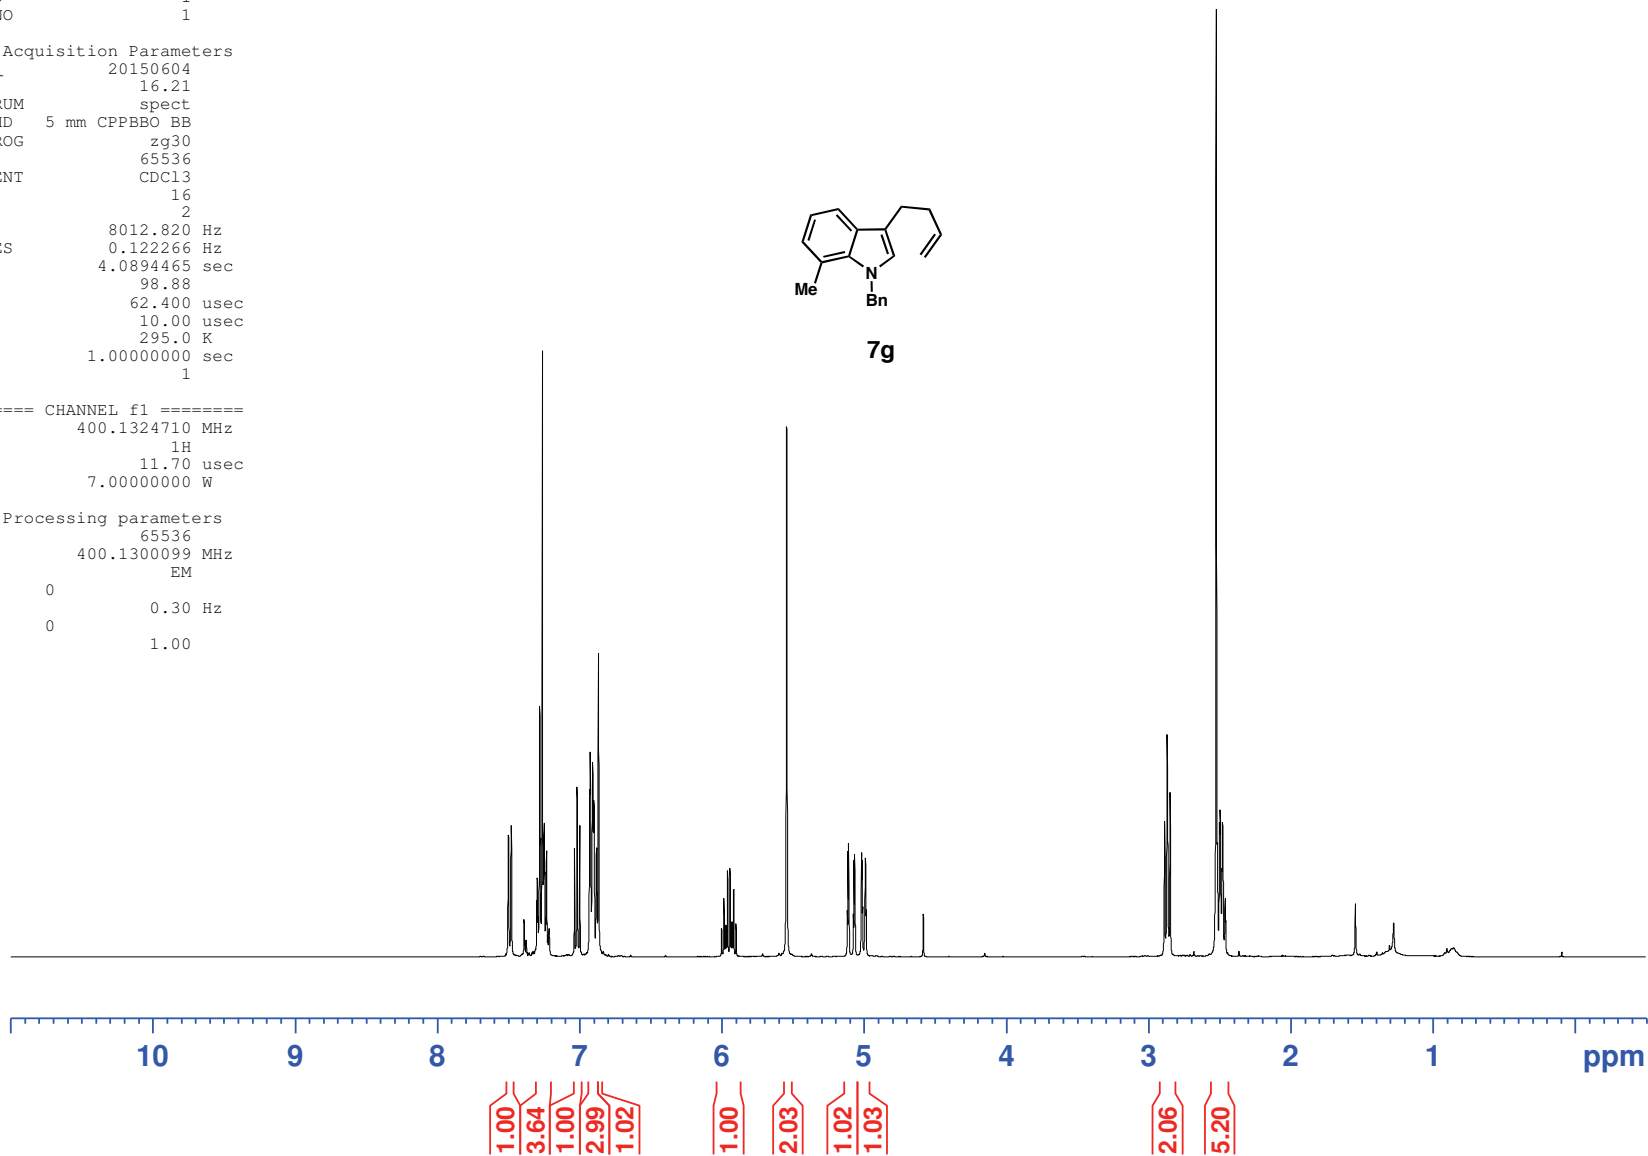

Current Data Parameters  
NAME JN-5-013C-char  
EXPNO 2  
PROCNO 1

F2 - Acquisition Parameters  
Date\_ 20150604  
Time 16.29  
INSTRUM spect  
PROBHD 5 mm CPPBBO BB  
PULPROG zgpg30  
TD 65536  
SOLVENT CDCl3  
NS 384  
DS 2  
SWH 24038.461 Hz  
FIDRES 0.366798 Hz  
AQ 1.3631488 sec  
RG 78.69  
DW 20.800 usec  
DE 82.37 usec  
TE 295.0 K  
D1 2.0000000 sec  
D11 0.0300000 sec  
TD0 3

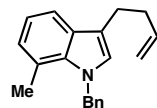

7g

=====  
CHANNEL f1  
SFO1 100.6228298 MHz  
NUC1 13C  
P1 10.00 usec  
PLW1 36.0000000 W

=====  
CHANNEL f2  
SFO2 400.1316005 MHz  
NUC2 1H  
CPDPRG[2] waltz16  
PCPD2 90.00 usec  
PLW2 7.0000000 W  
PLW12 0.1203300 W  
PLW13 0.0974680 W

F2 - Processing parameters  
SI 32768  
SF 100.6127685 MHz  
WDW EM  
SSB 0  
LB 1.00 Hz  
GB 0  
PC 1.40

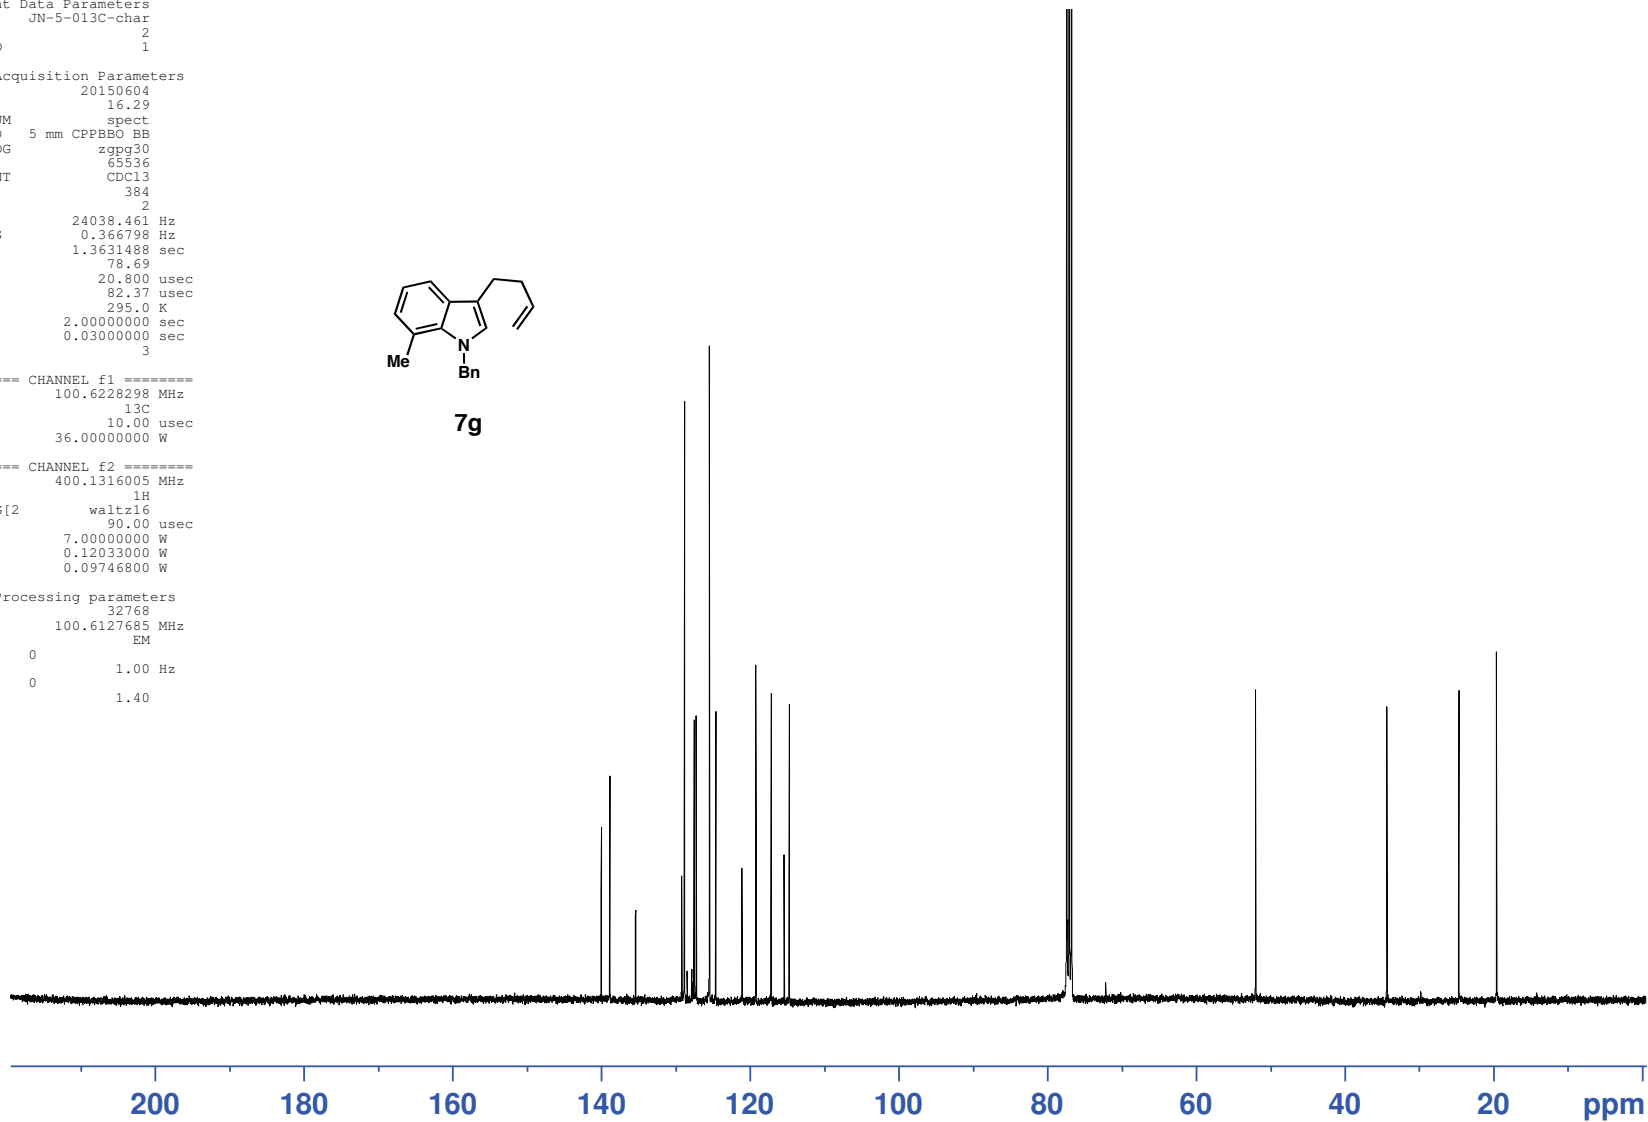

Current Data Parameters  
NAME JN-4-285A-char  
EXPNO 1  
PROCNO 1

F2 - Acquisition Parameters  
Date\_ 20150604  
Time 14.34  
INSTRUM spect  
PROBHD 5 mm CPPBBO BB  
PULPROG zg30  
TD 65536  
SOLVENT CDCl3  
NS 16  
DS 2  
SWH 8012.820 Hz  
FIDRES 0.122266 Hz  
AQ 4.0894465 sec  
RG 98.88  
DW 62.400 usec  
DE 10.00 usec  
TE 294.9 K  
D1 1.00000000 sec  
TD0 1

==== CHANNEL f1 =====  
SF01 400.1324710 MHz  
NUC1 1H  
P1 11.70 usec  
PLW1 7.00000000 W

F2 - Processing parameters  
SI 65536  
SF 400.1300099 MHz  
WDW EM  
SSB 0  
LB 0.30 Hz  
GB 0  
PC 1.00

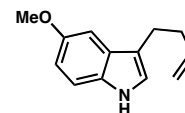

S5

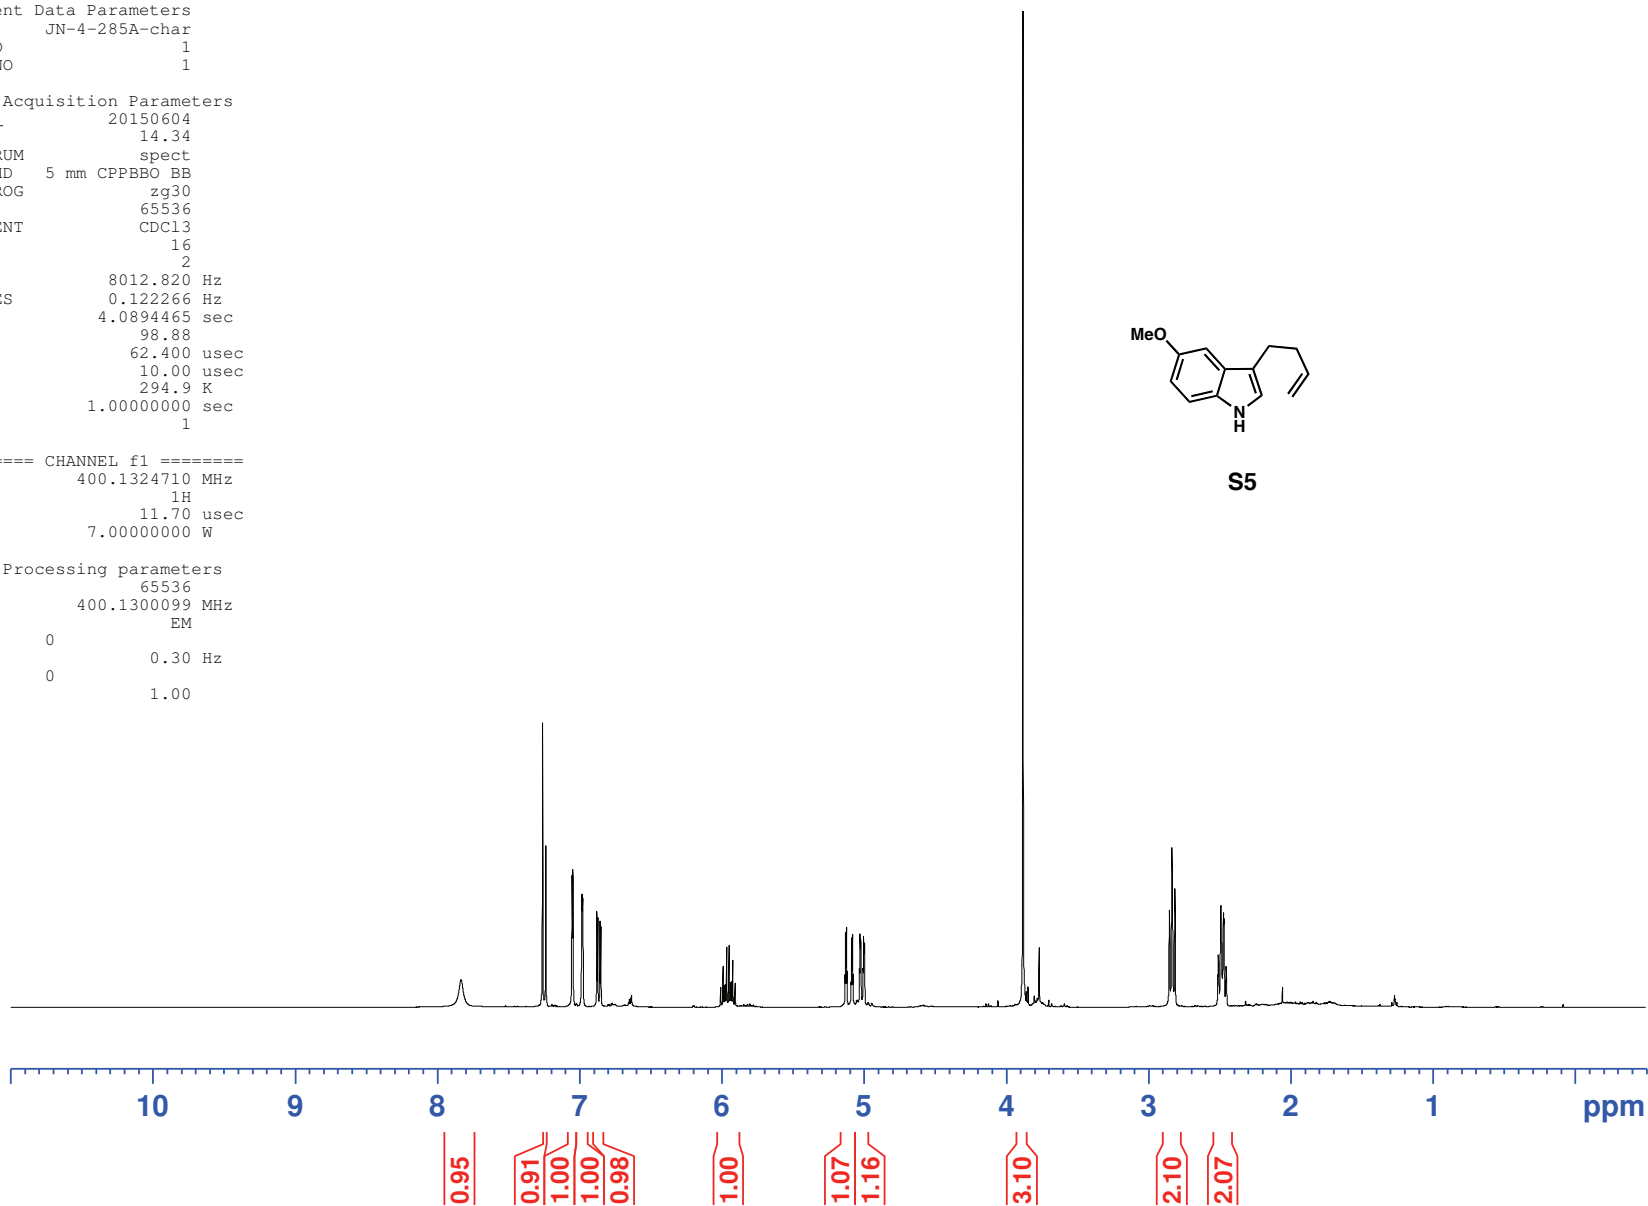

Current Data Parameters  
NAME JN-4-285A-char  
EXPNO 2  
PROCNO 1

F2 - Acquisition Parameters  
Date\_ 20150604  
Time 14.42  
INSTRUM spect  
PROBHD 5 mm CPPBBO BB  
PULPROG zgpg30  
TD 65536  
SOLVENT CDCl3  
NS 384  
DS 2  
SWH 24038.461 Hz  
FIDRES 0.366798 Hz  
AQ 1.3631488 sec  
RG 87.75  
DW 20.800 usec  
DE 82.37 usec  
TE 295.0 K  
D1 2.0000000 sec  
D11 0.0300000 sec  
TD0 3

===== CHANNEL f1 =====  
SFO1 100.6228298 MHz  
NUC1 13C  
P1 10.00 usec  
PLW1 36.0000000 W

===== CHANNEL f2 =====  
SFO2 400.1316005 MHz  
NUC2 1H  
CPDPRG[2] waltz16  
PCPD2 90.00 usec  
PLW2 7.0000000 W  
PLW12 0.12033000 W  
PLW13 0.09746800 W

F2 - Processing parameters  
SI 32768  
SF 100.6127685 MHz  
WDW EM  
SSB 0  
LB 1.00 Hz  
GB 0  
PC 1.40

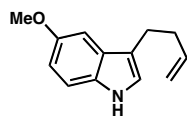

S5

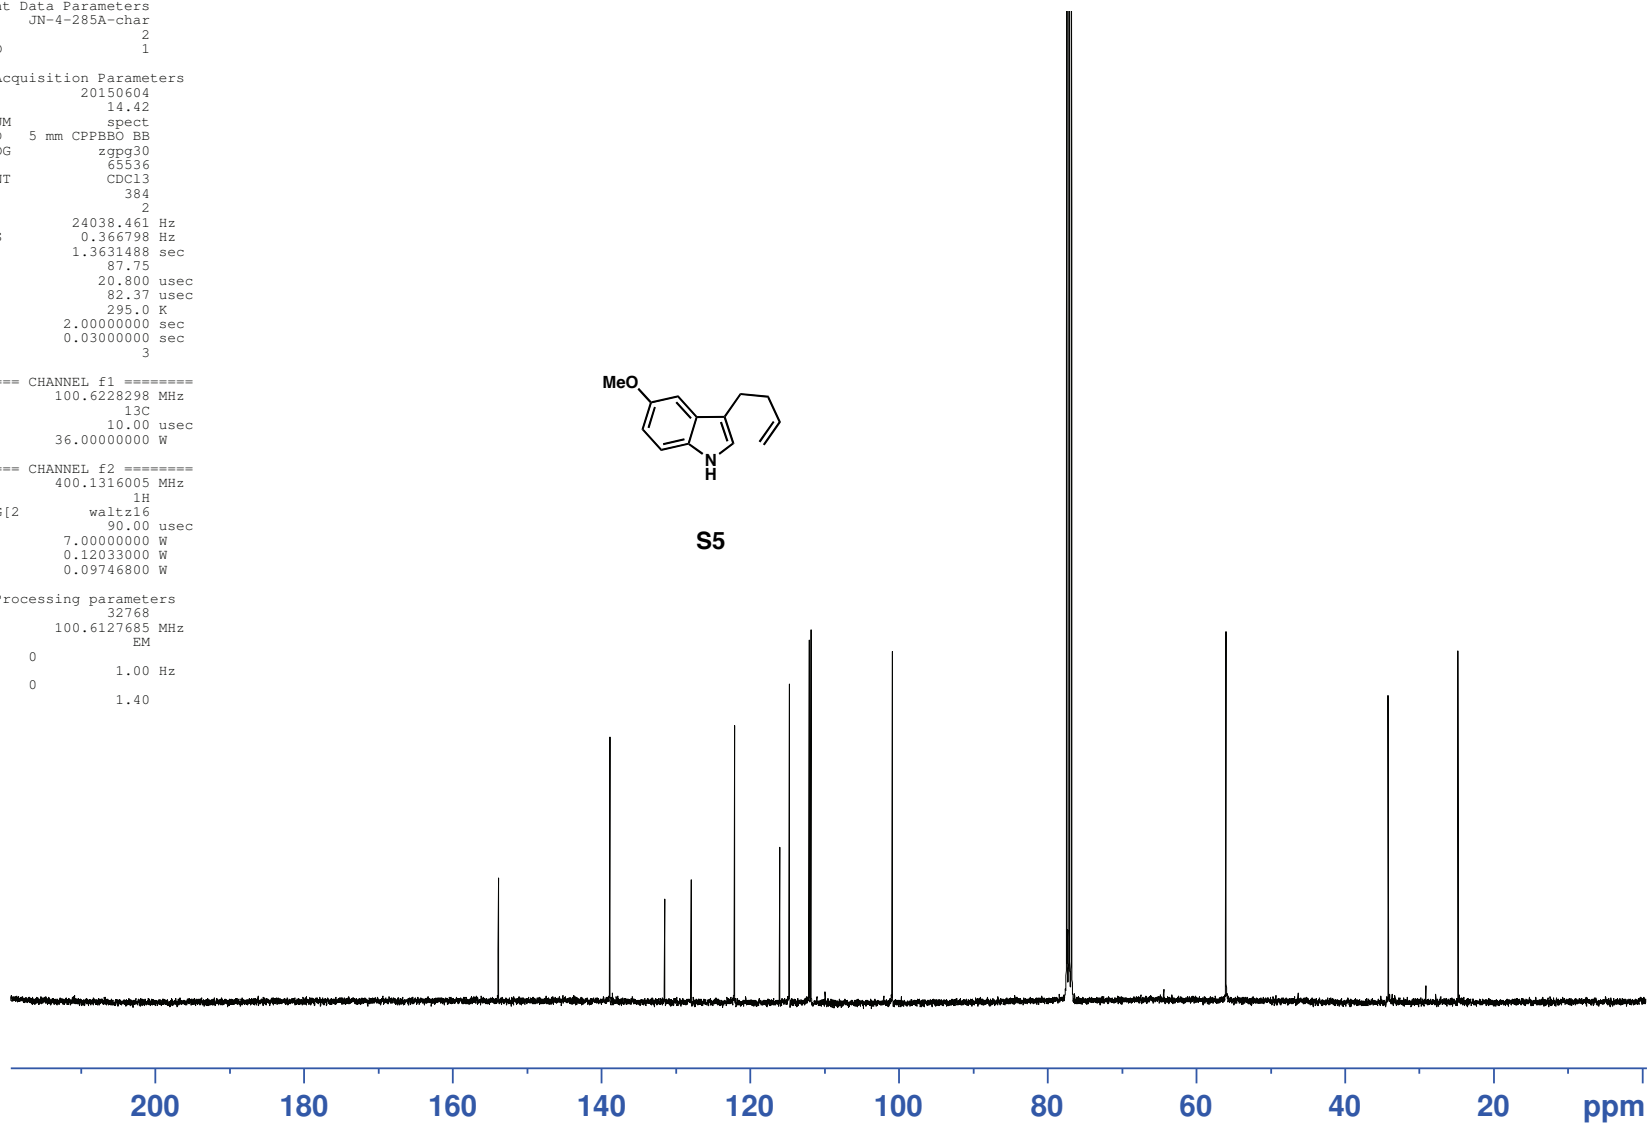



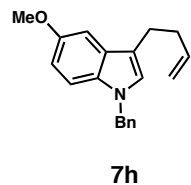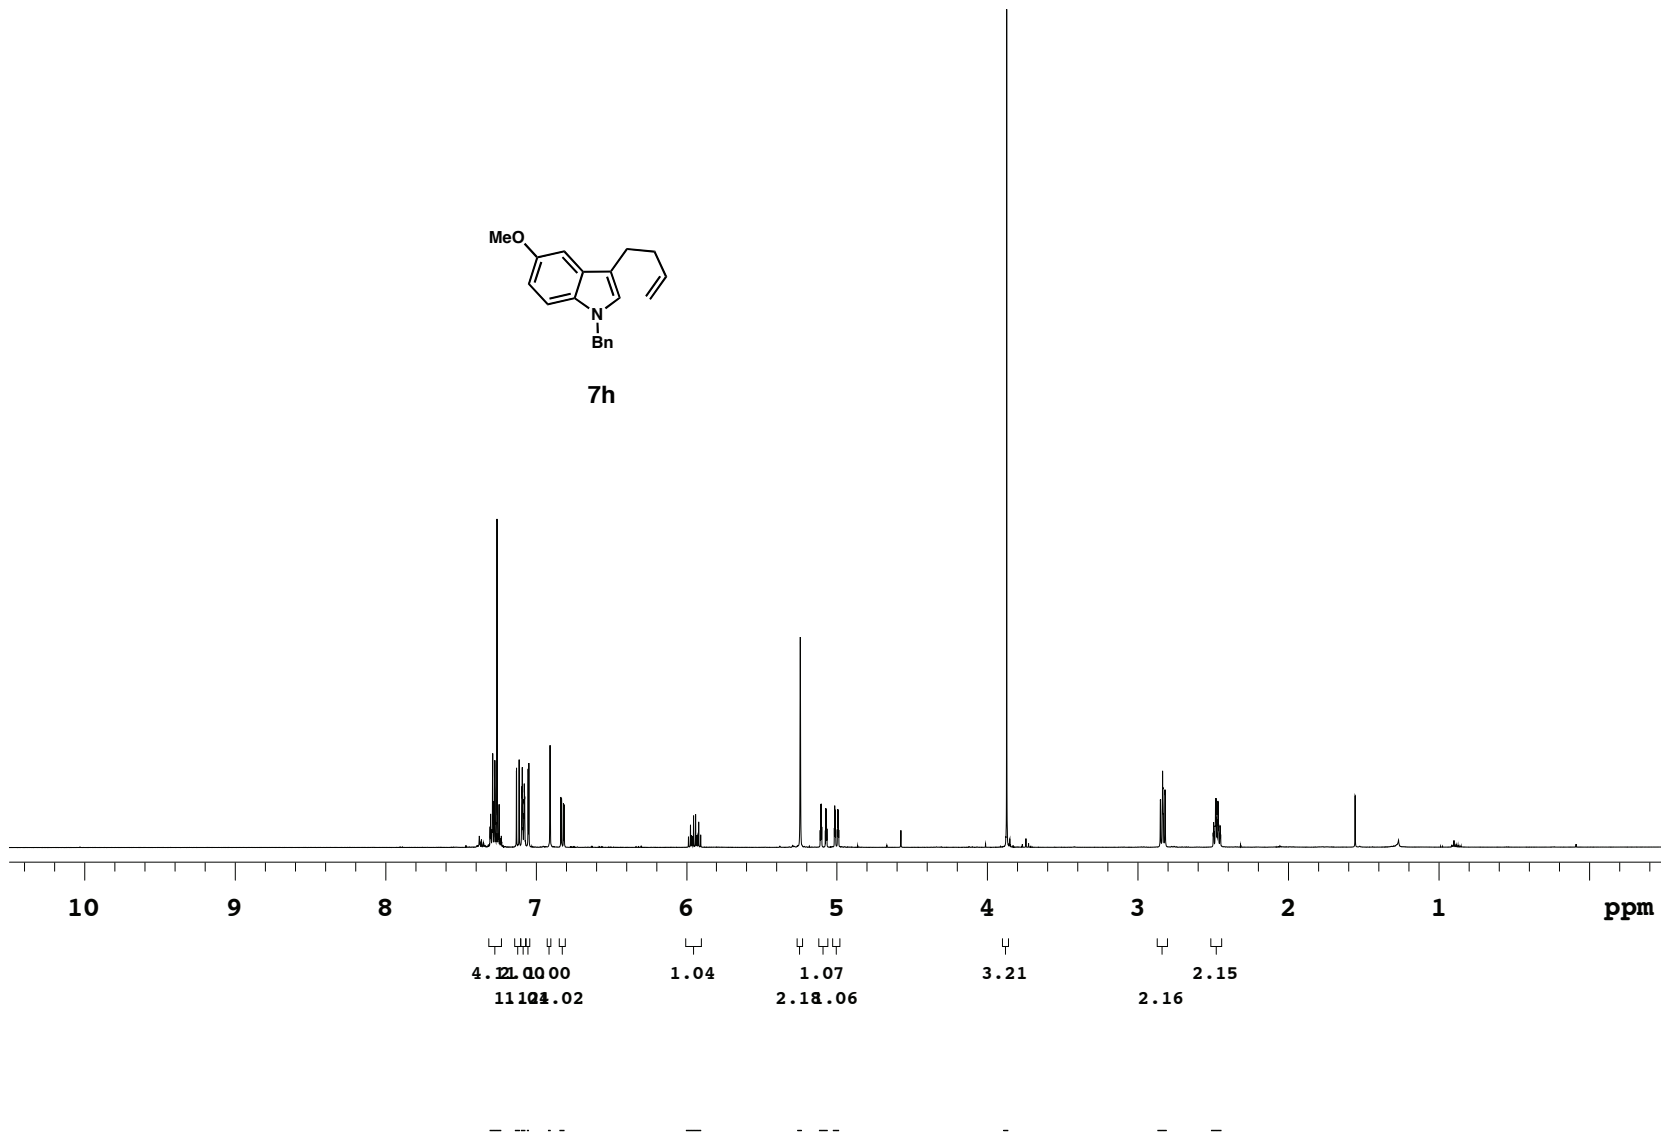

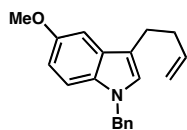

7h

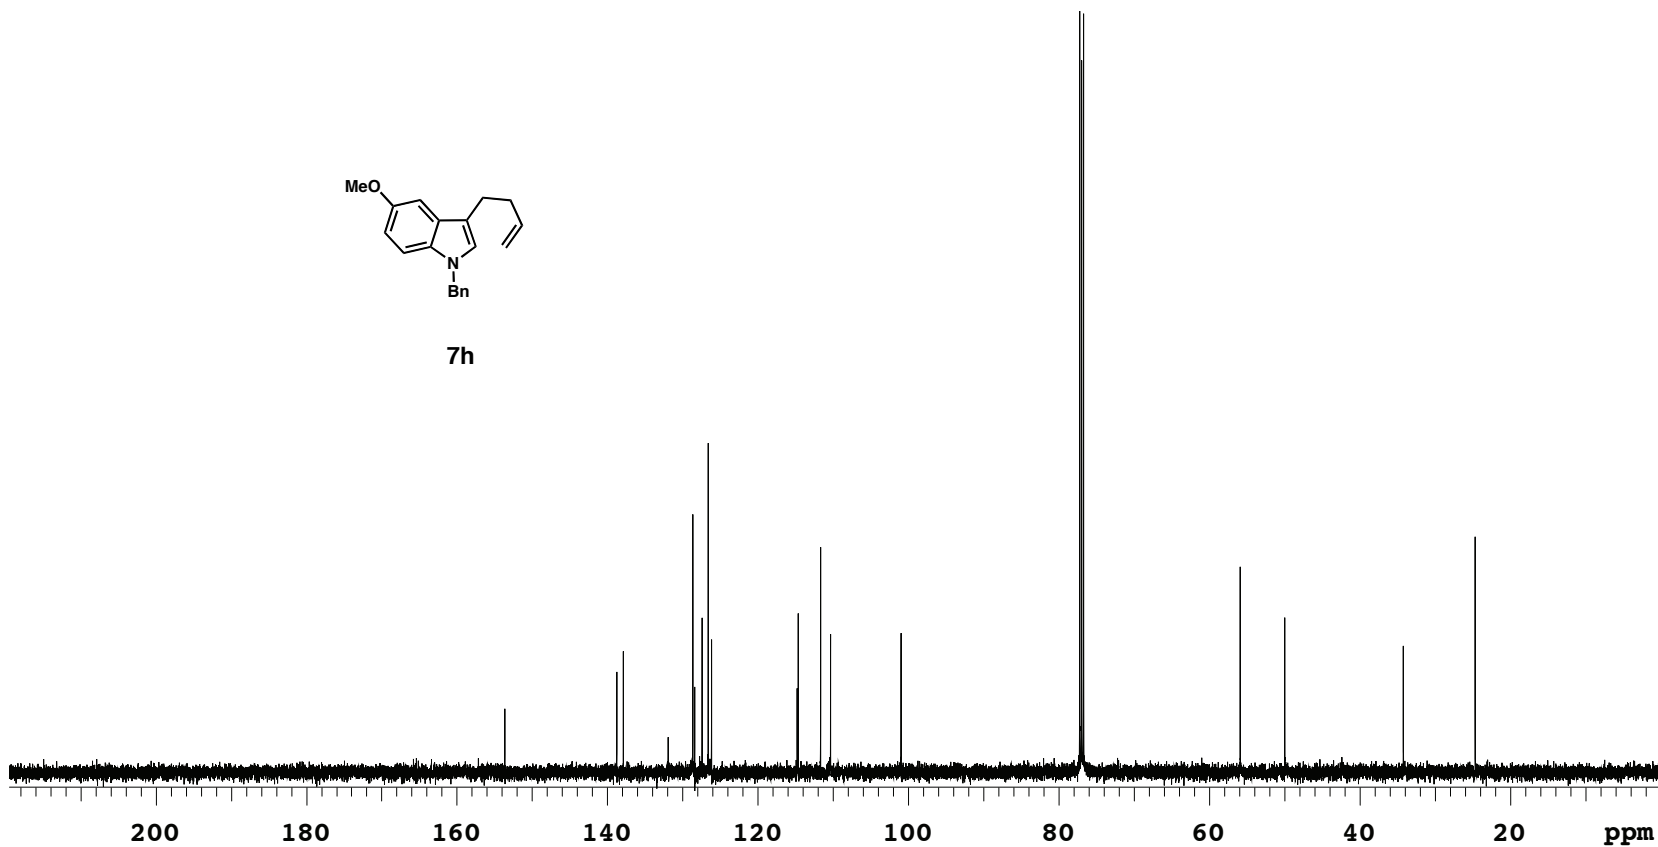

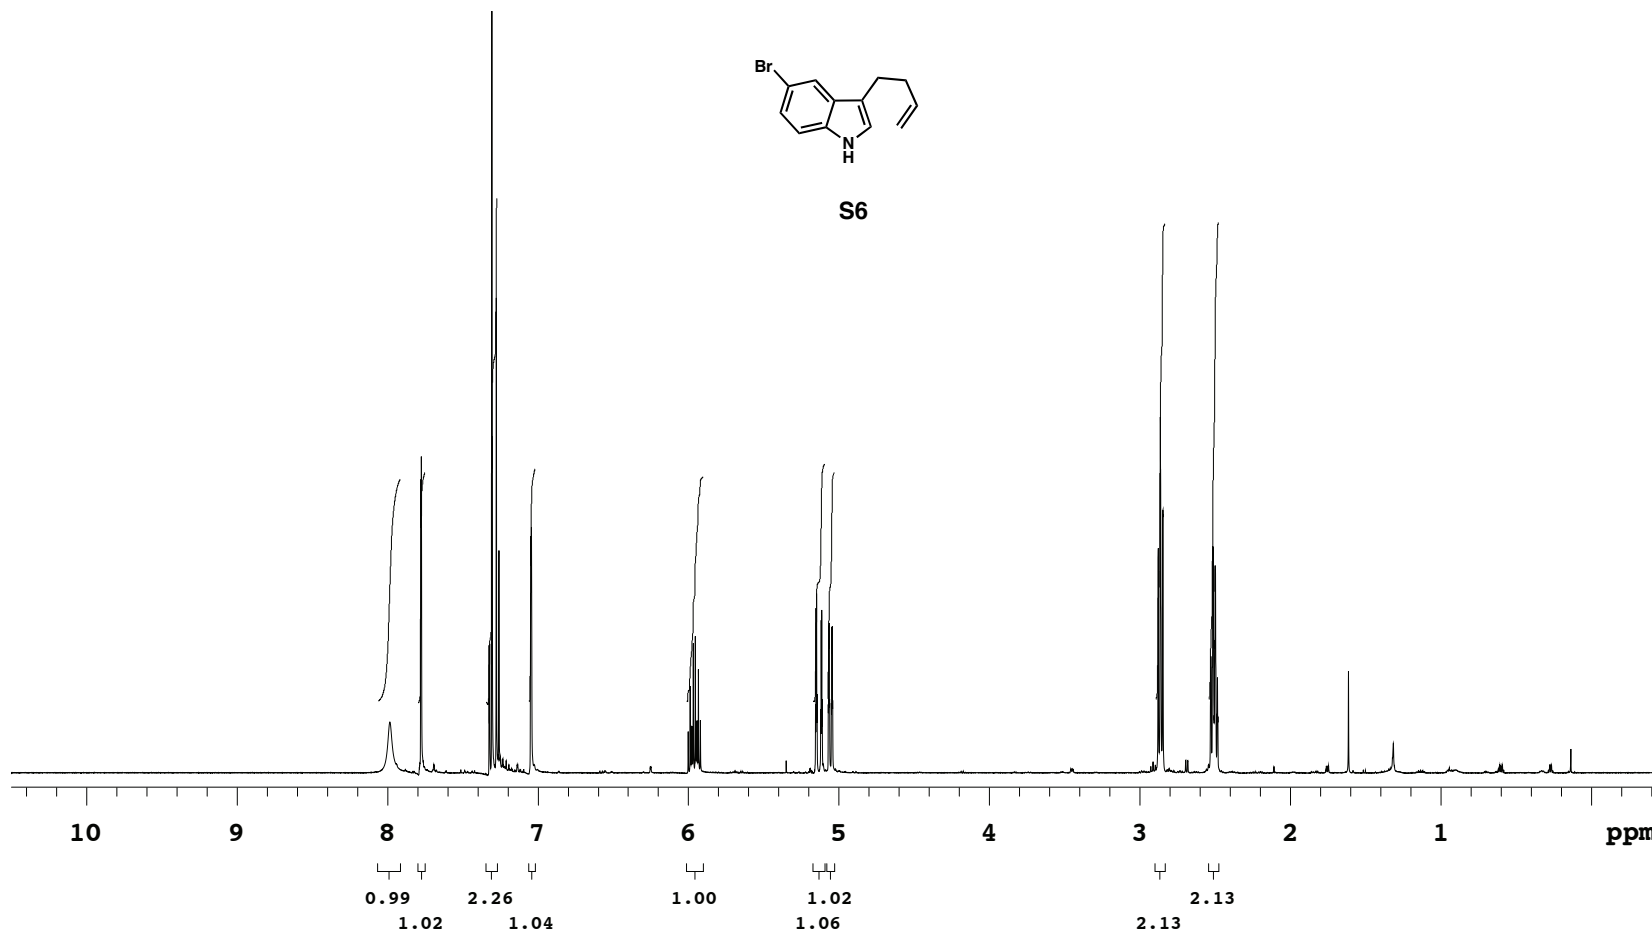

BED2-88char

Sample Name **BED2-88char**  
Date collected **2015-06-10**

Pulse sequence **CARBON**  
Solvent **cdcl3**

Temperature **25**  
Spectrometer **-vnmrs400**

Study owner **bdaniels**  
Operator **autouser**

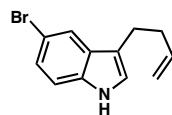

S6

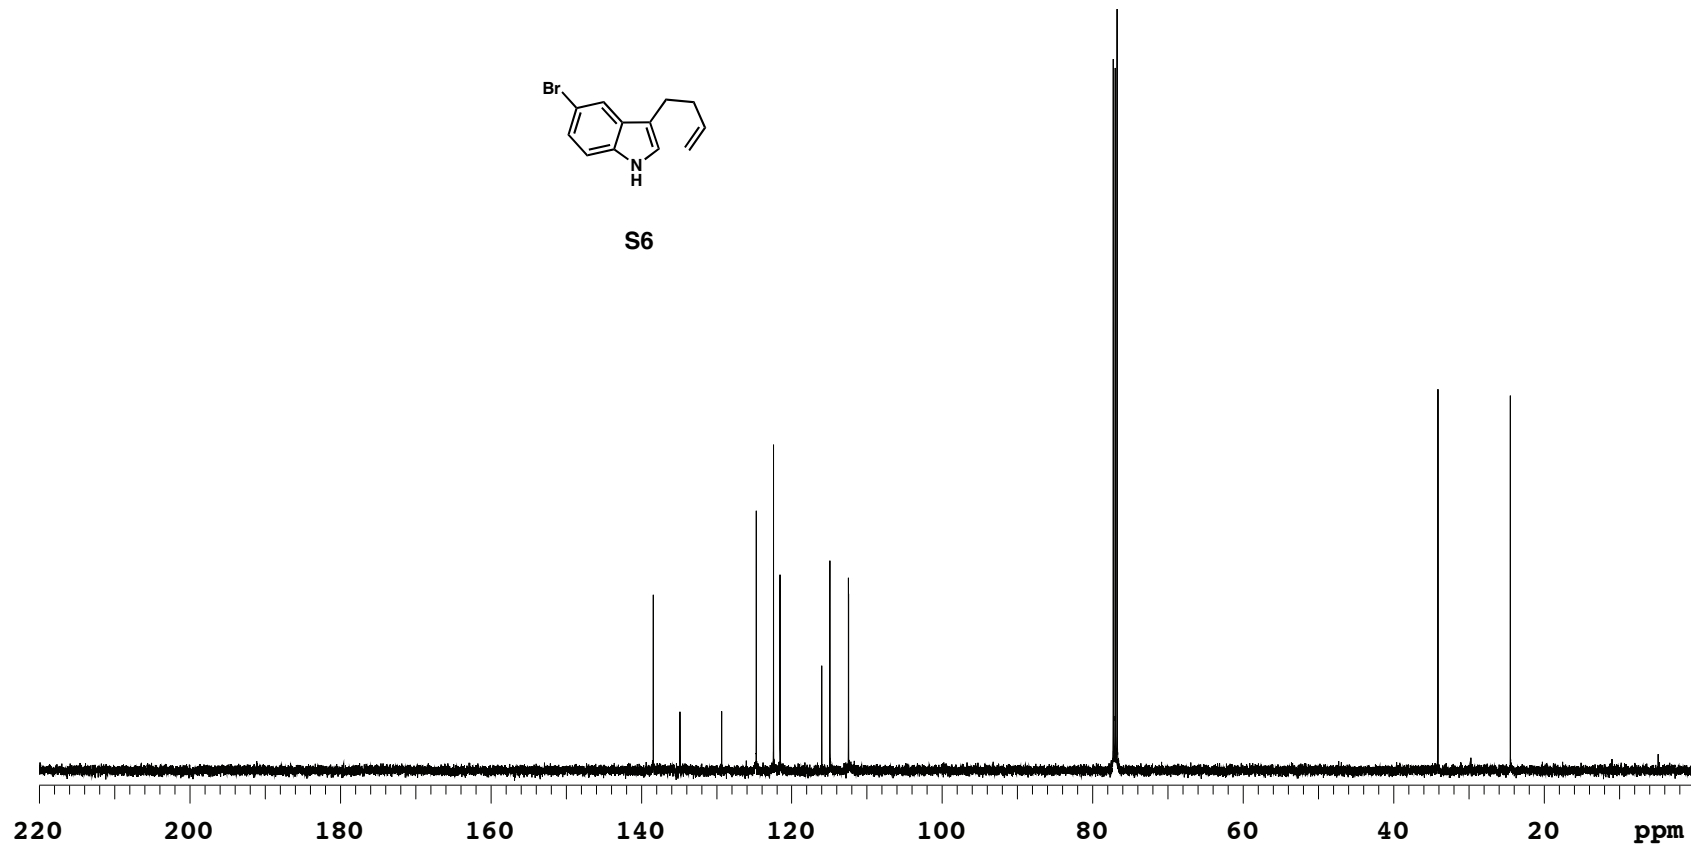

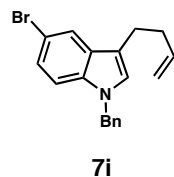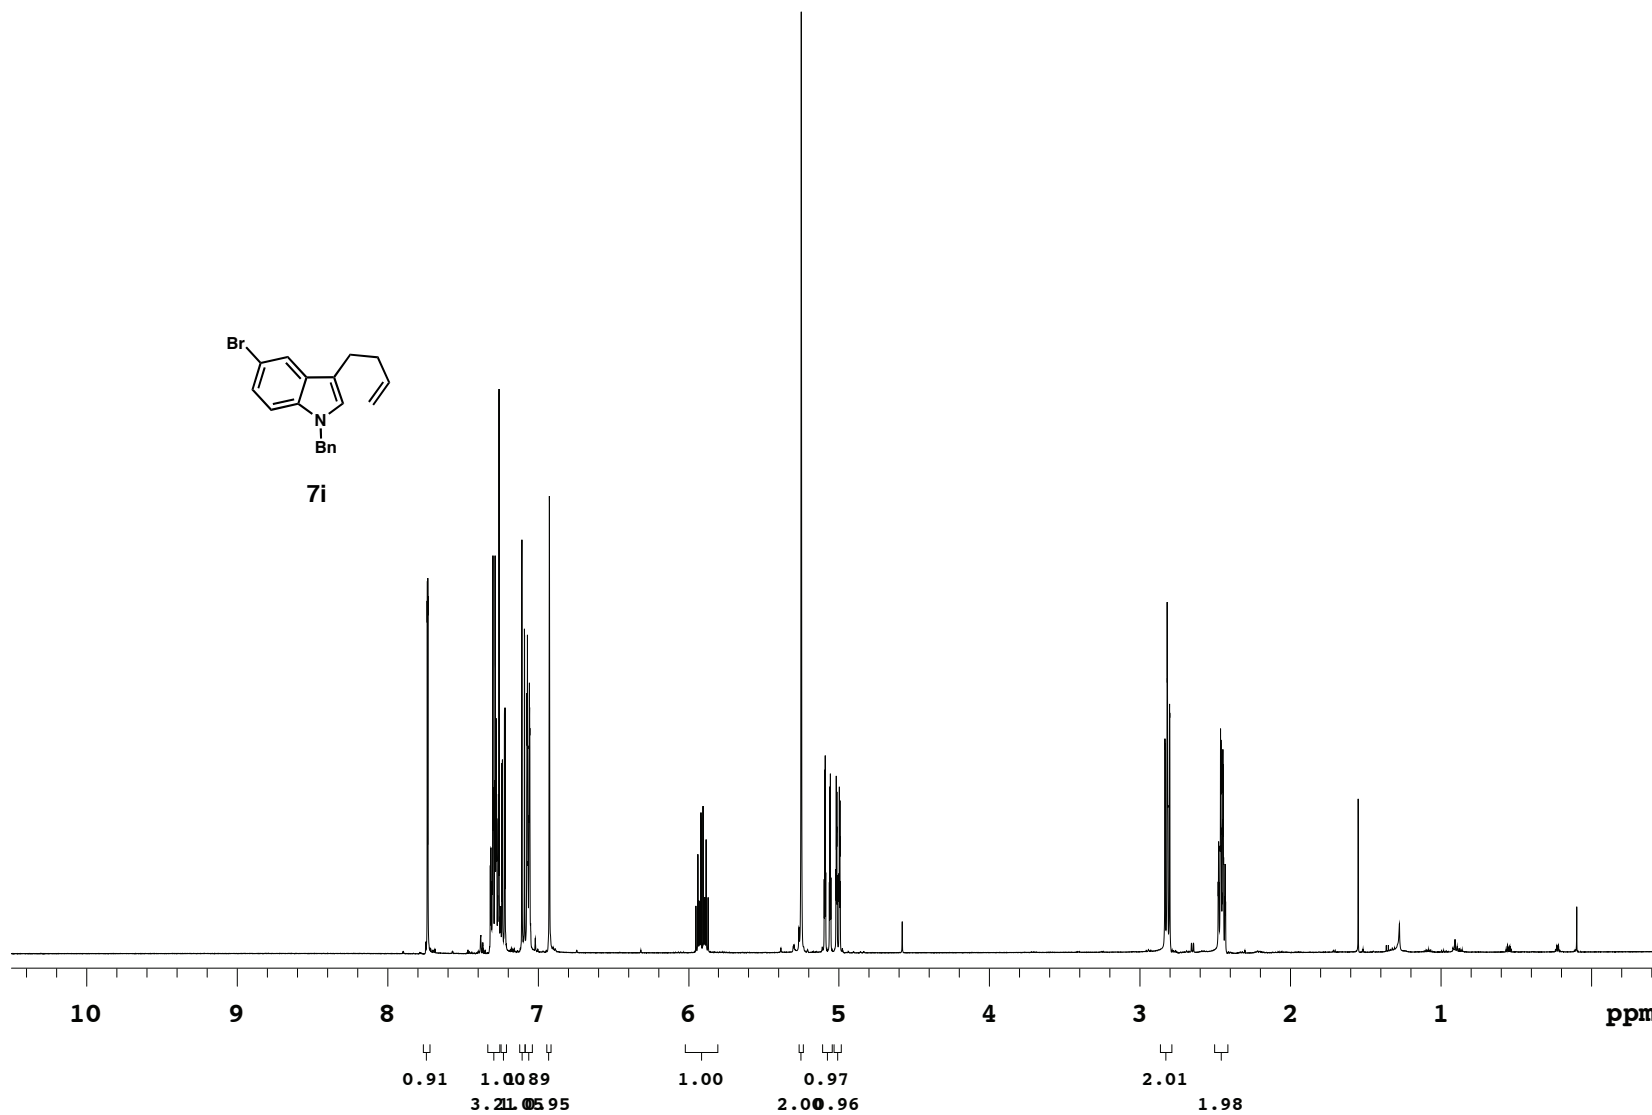

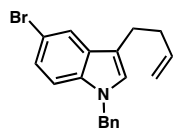

7i

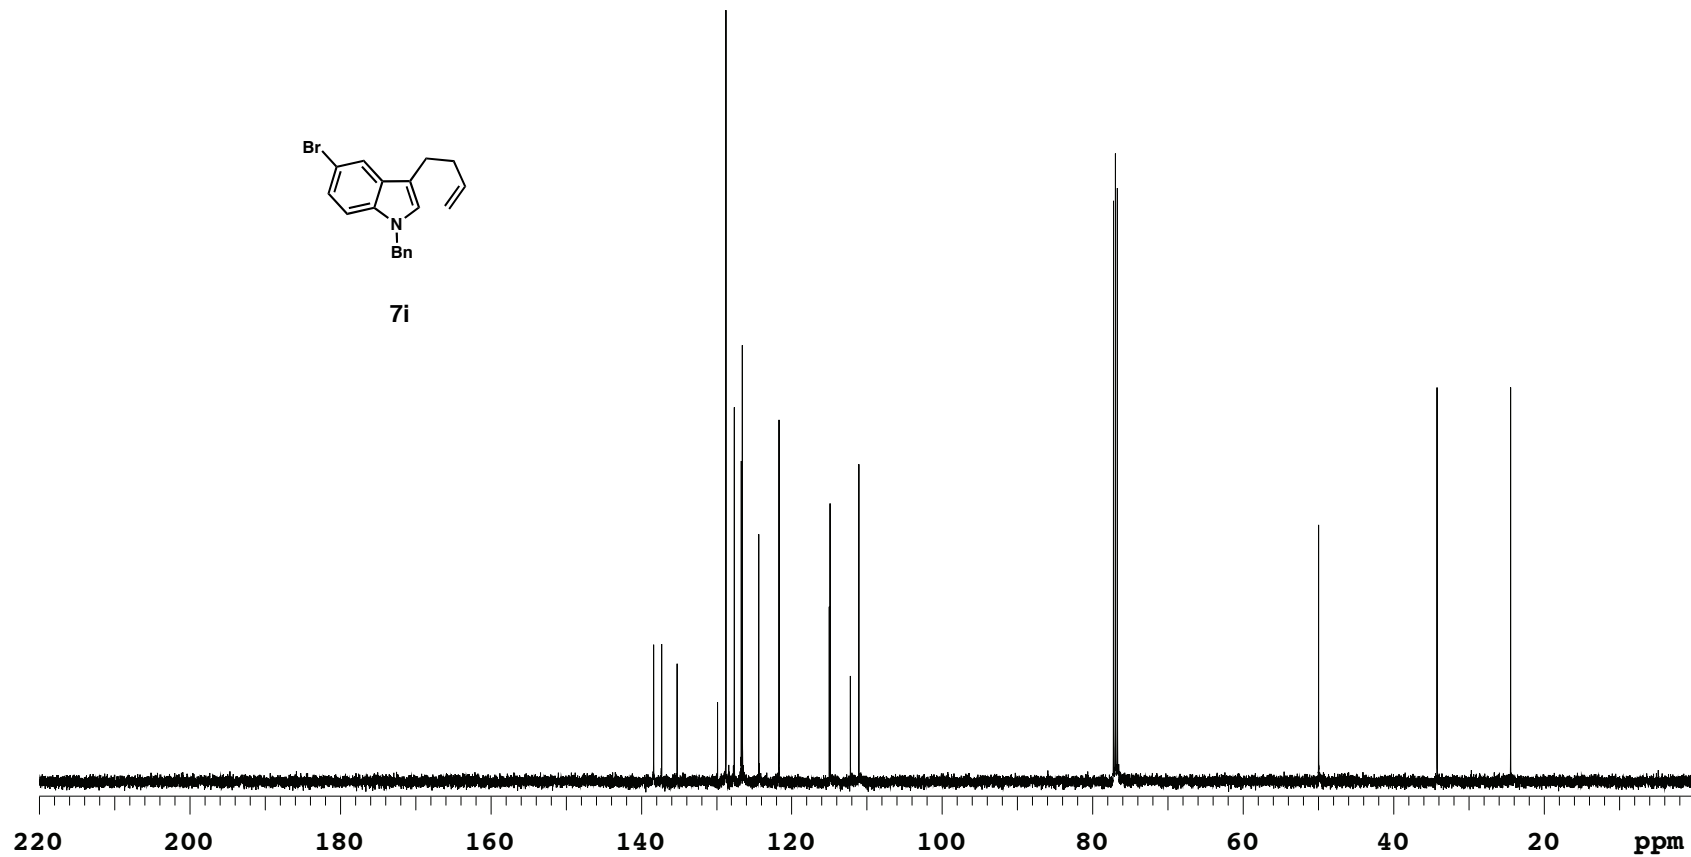

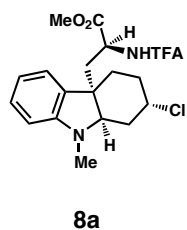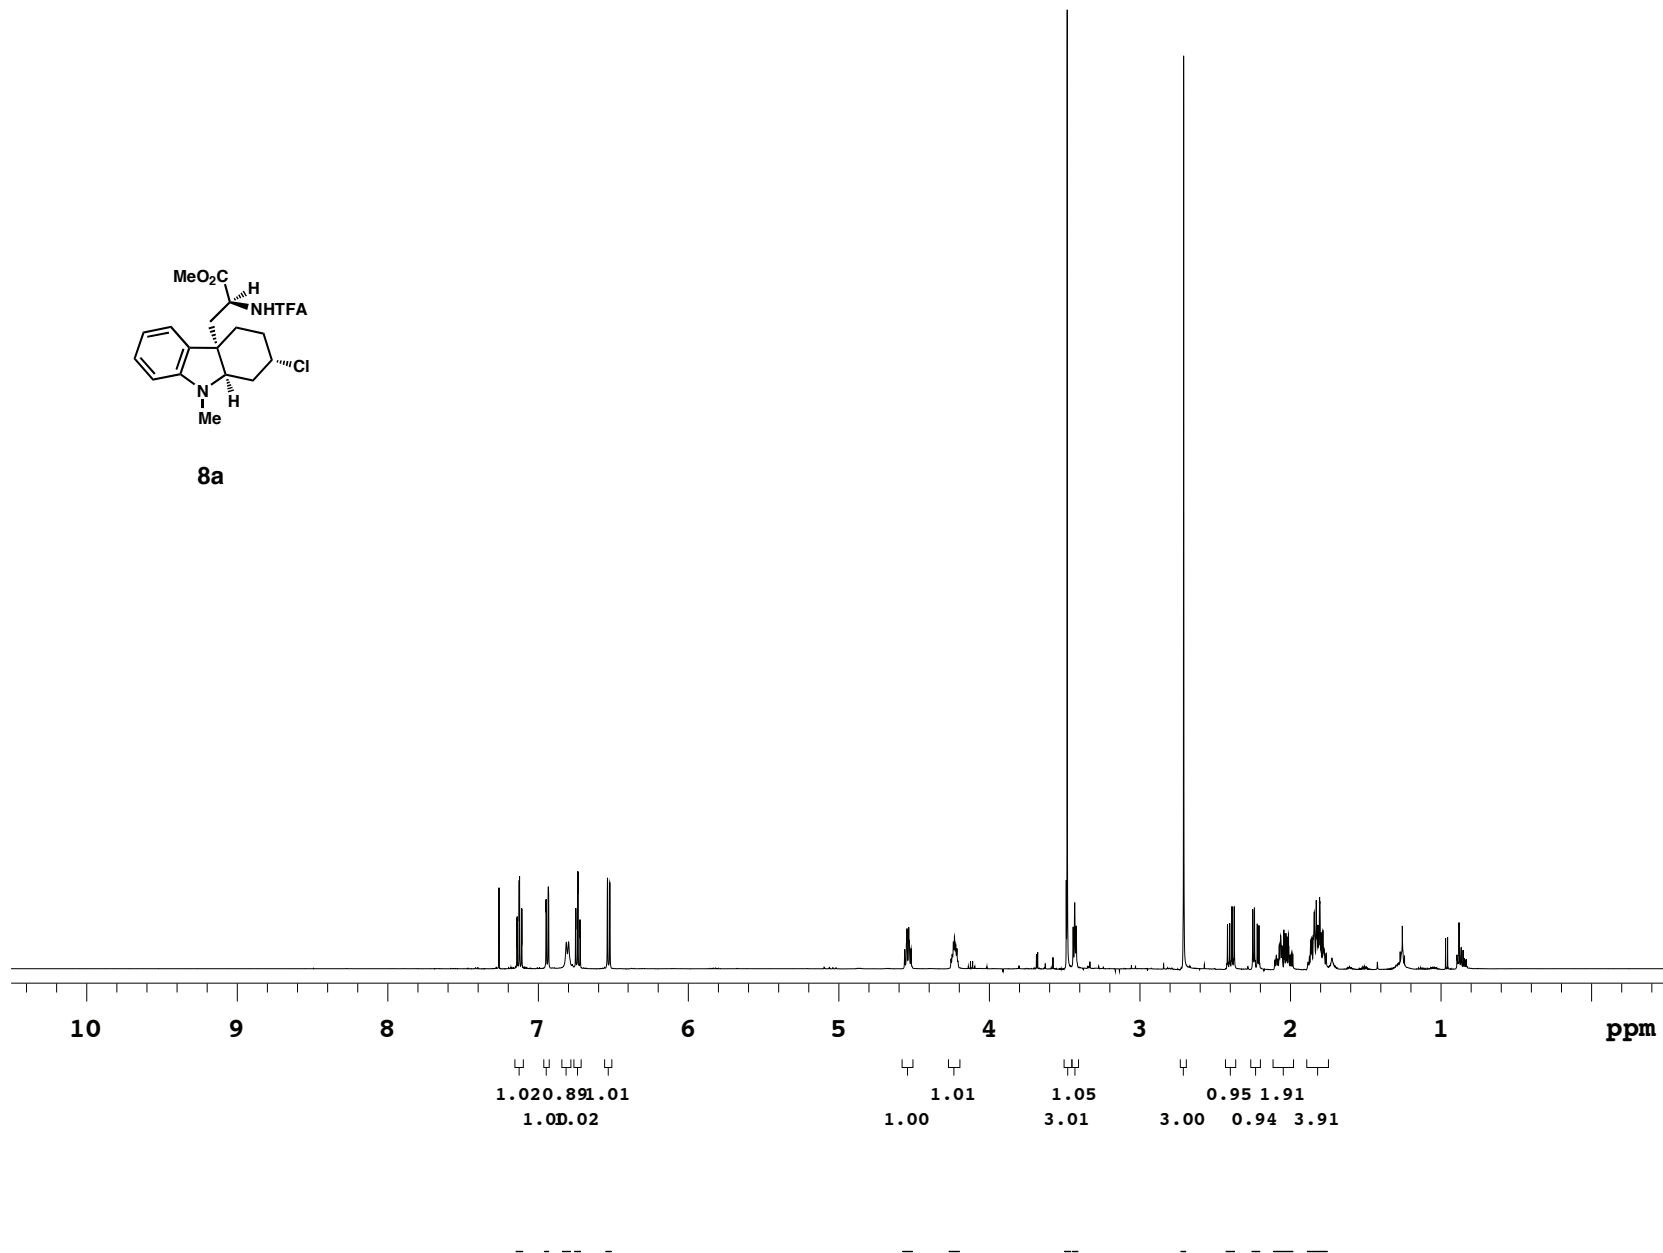

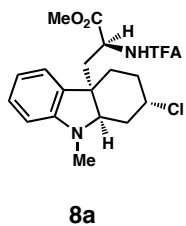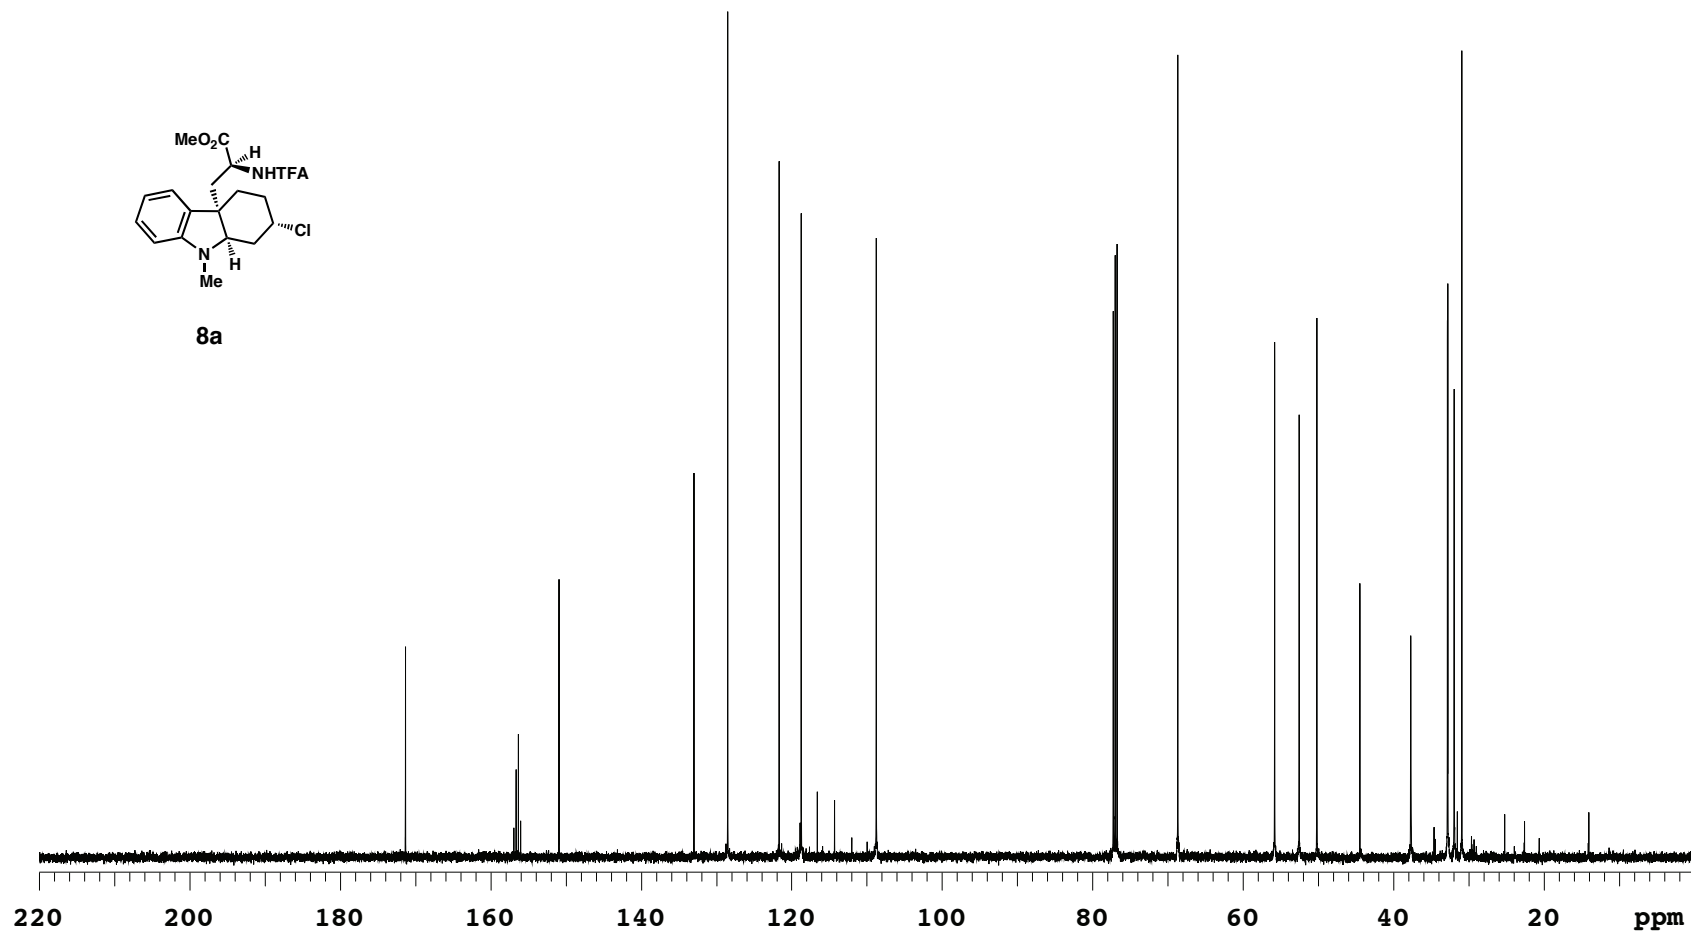



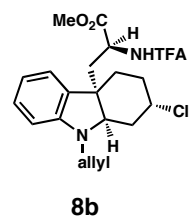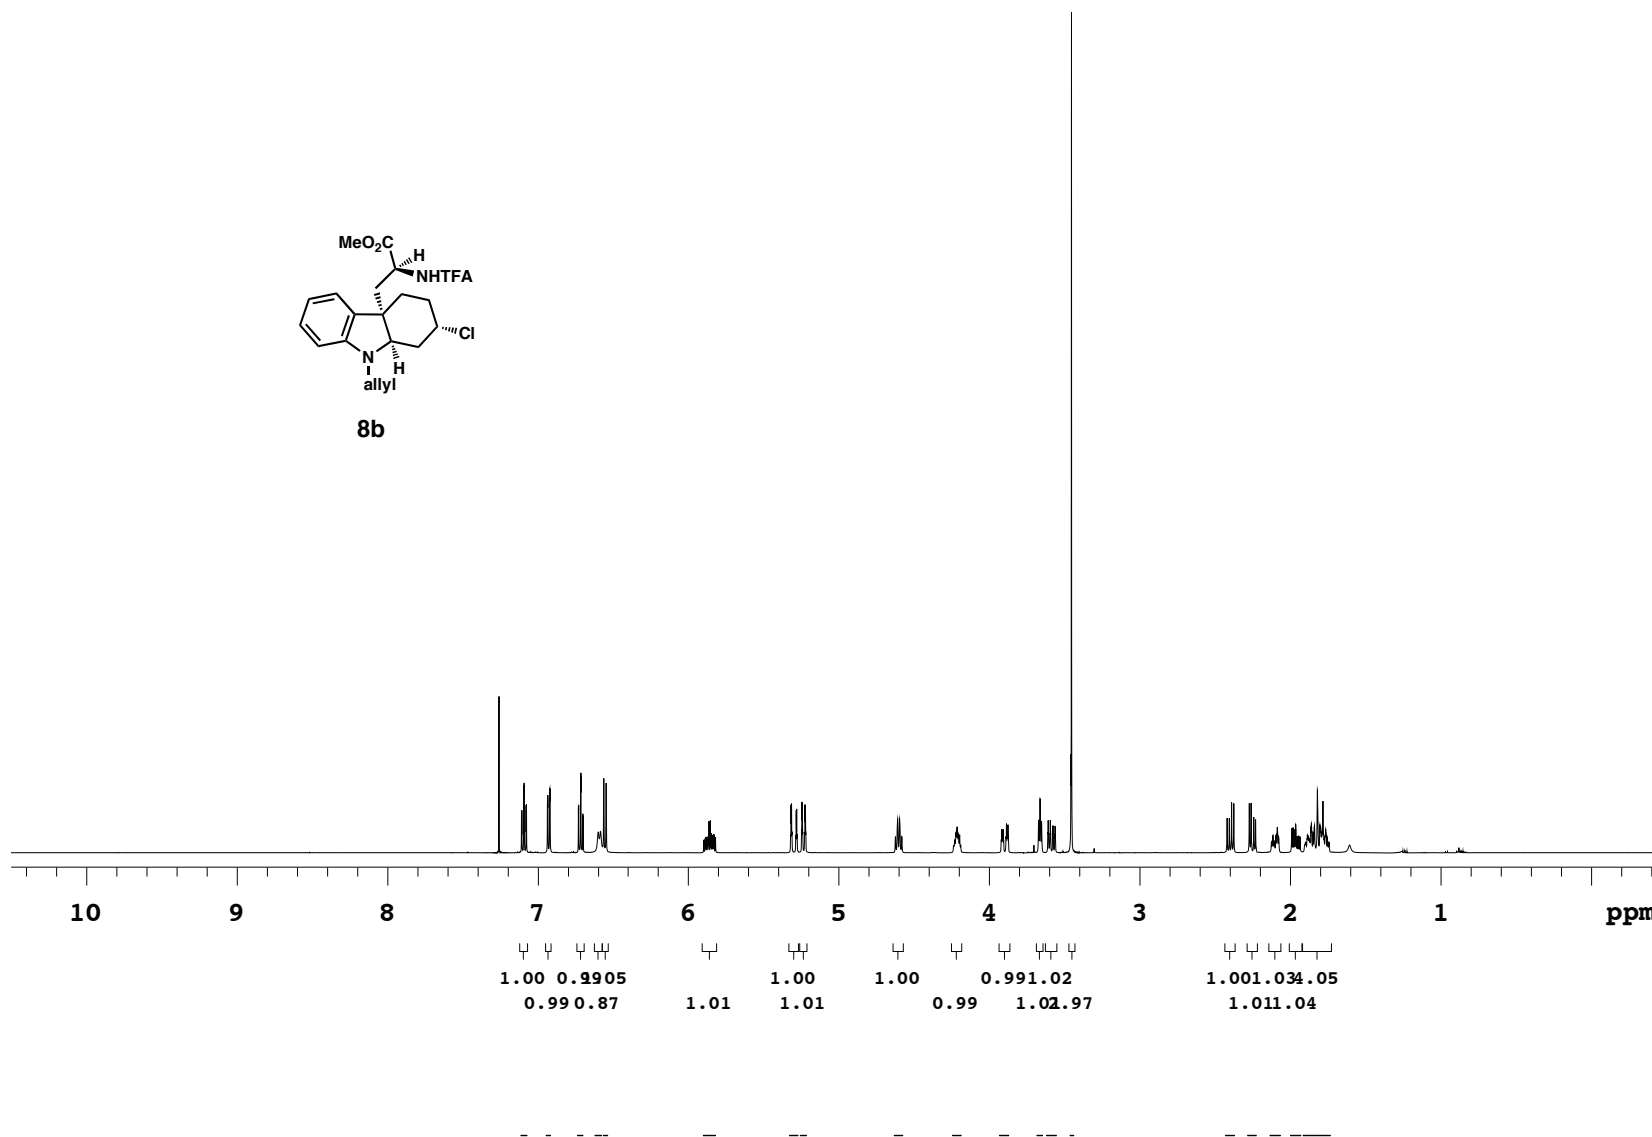

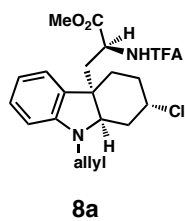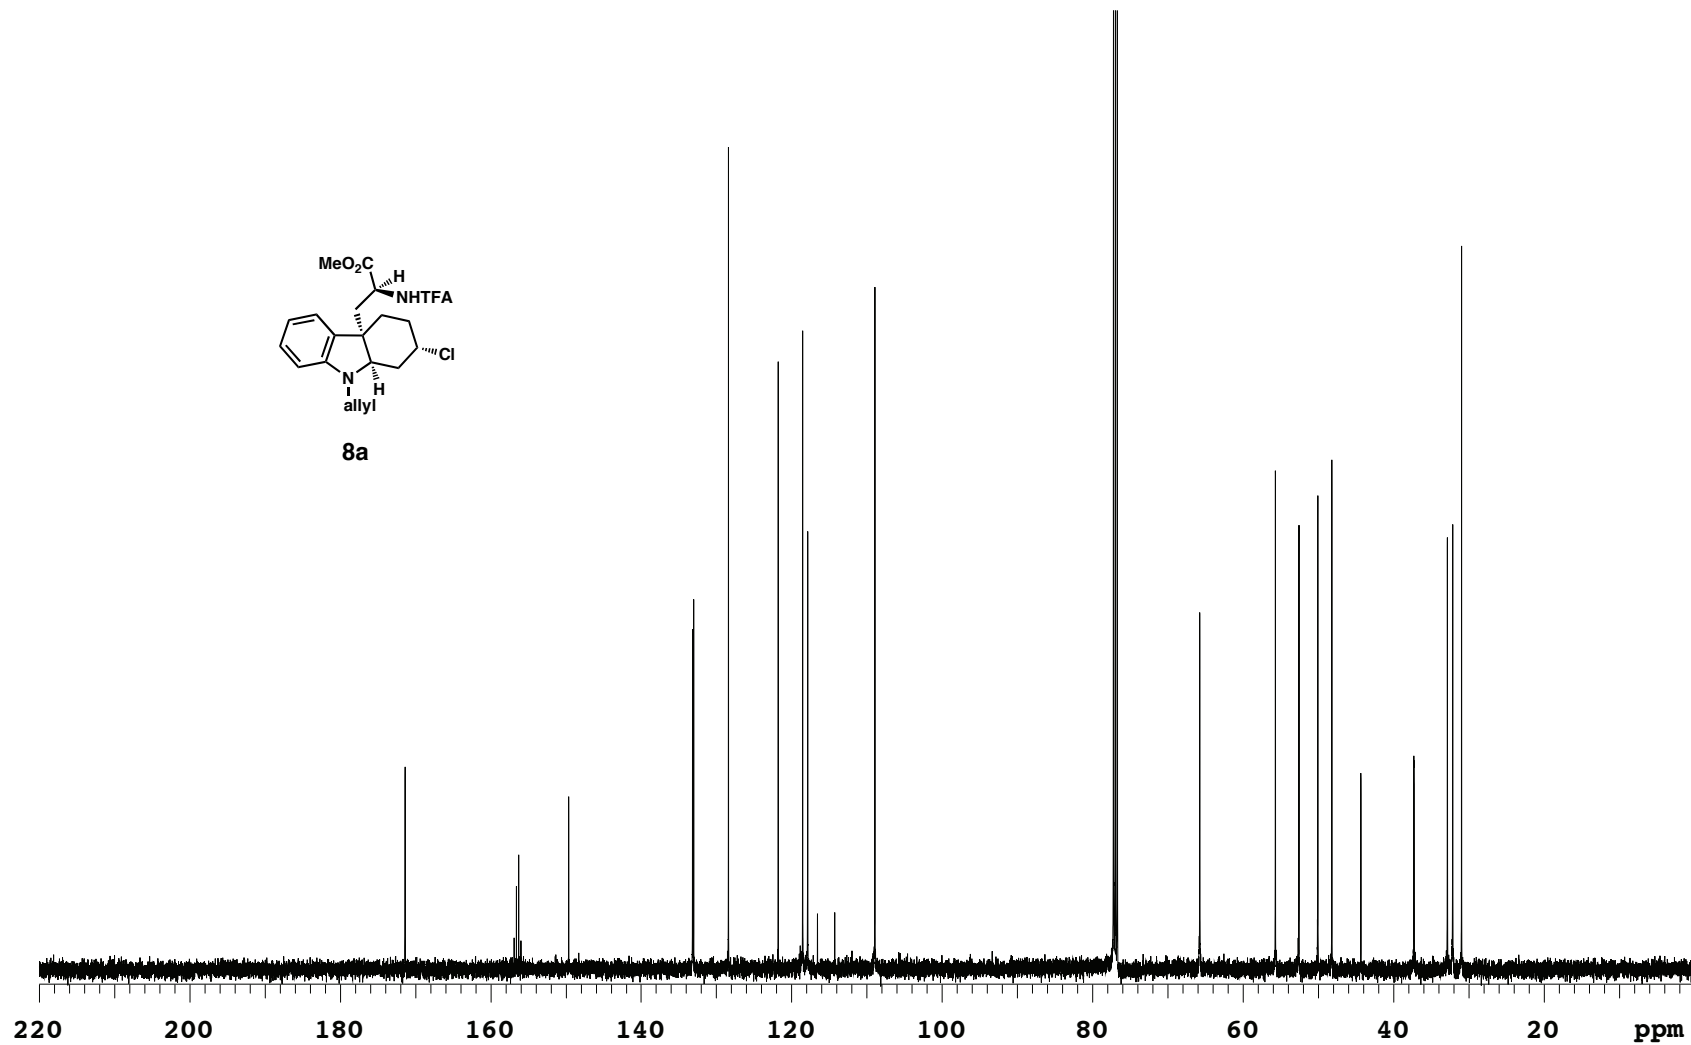

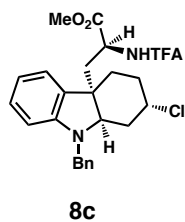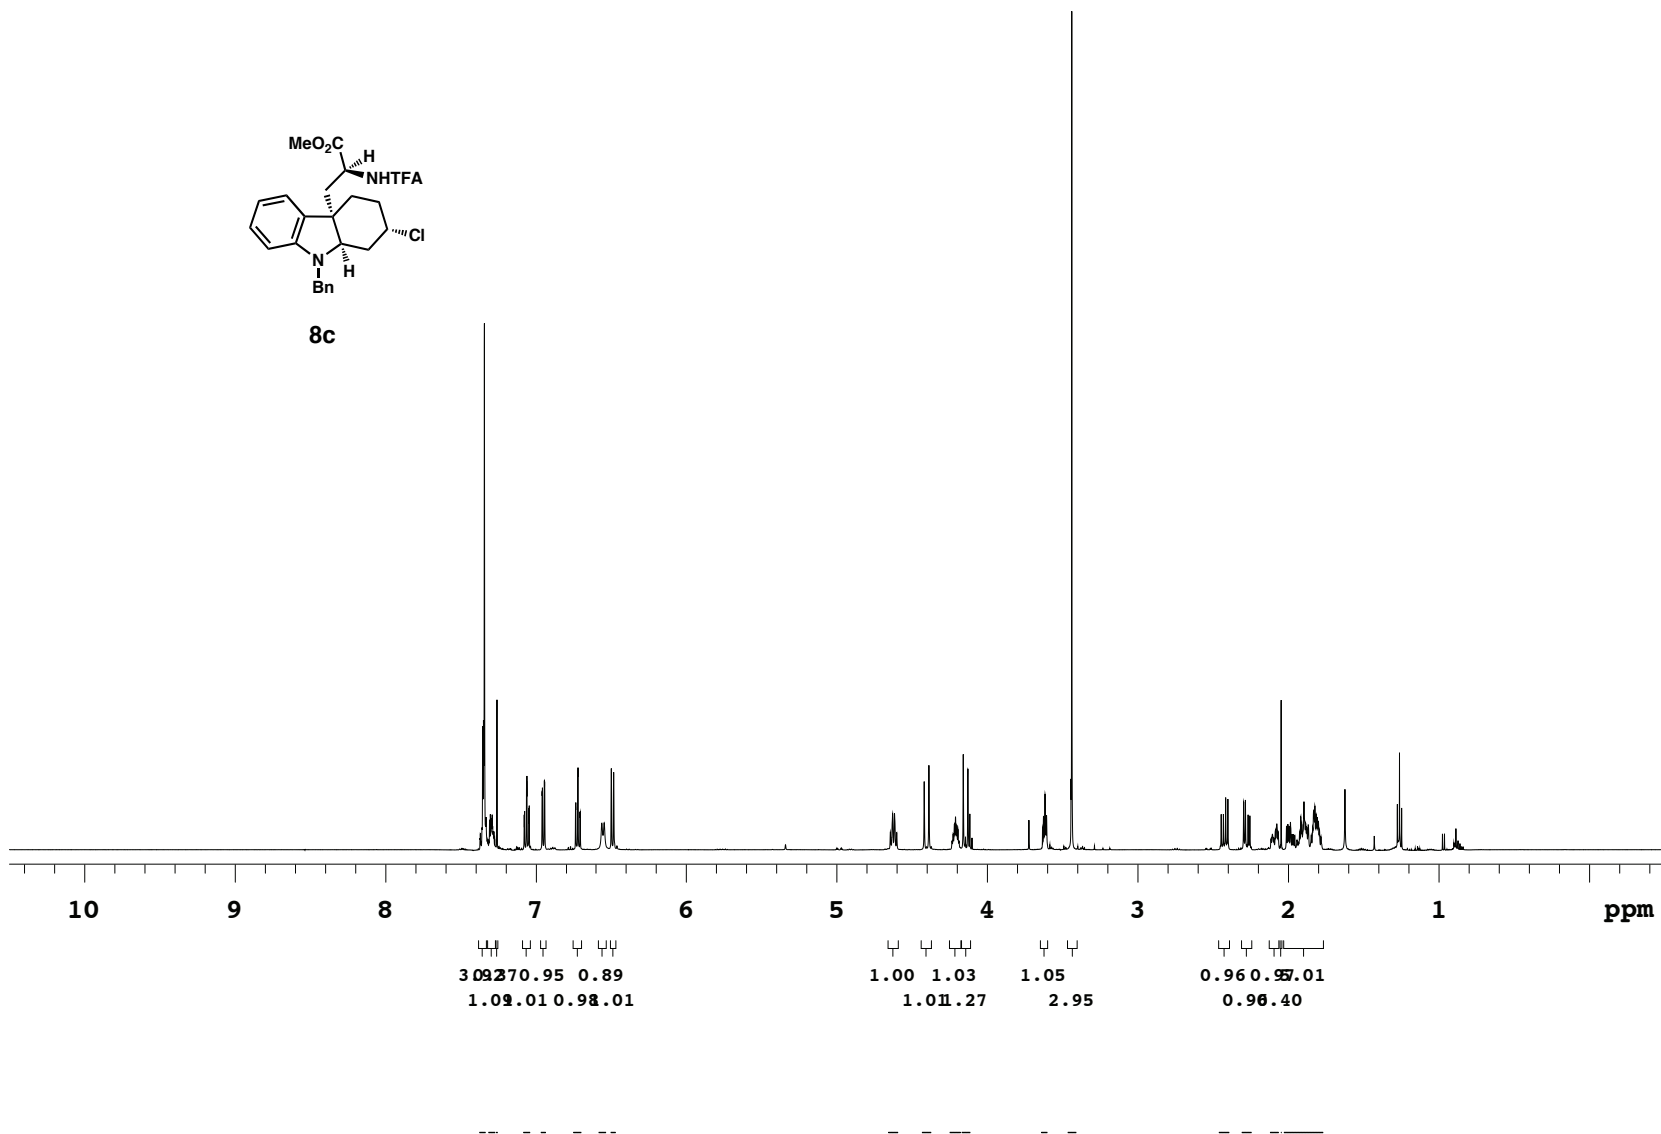

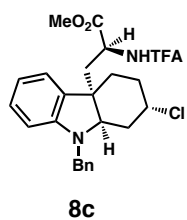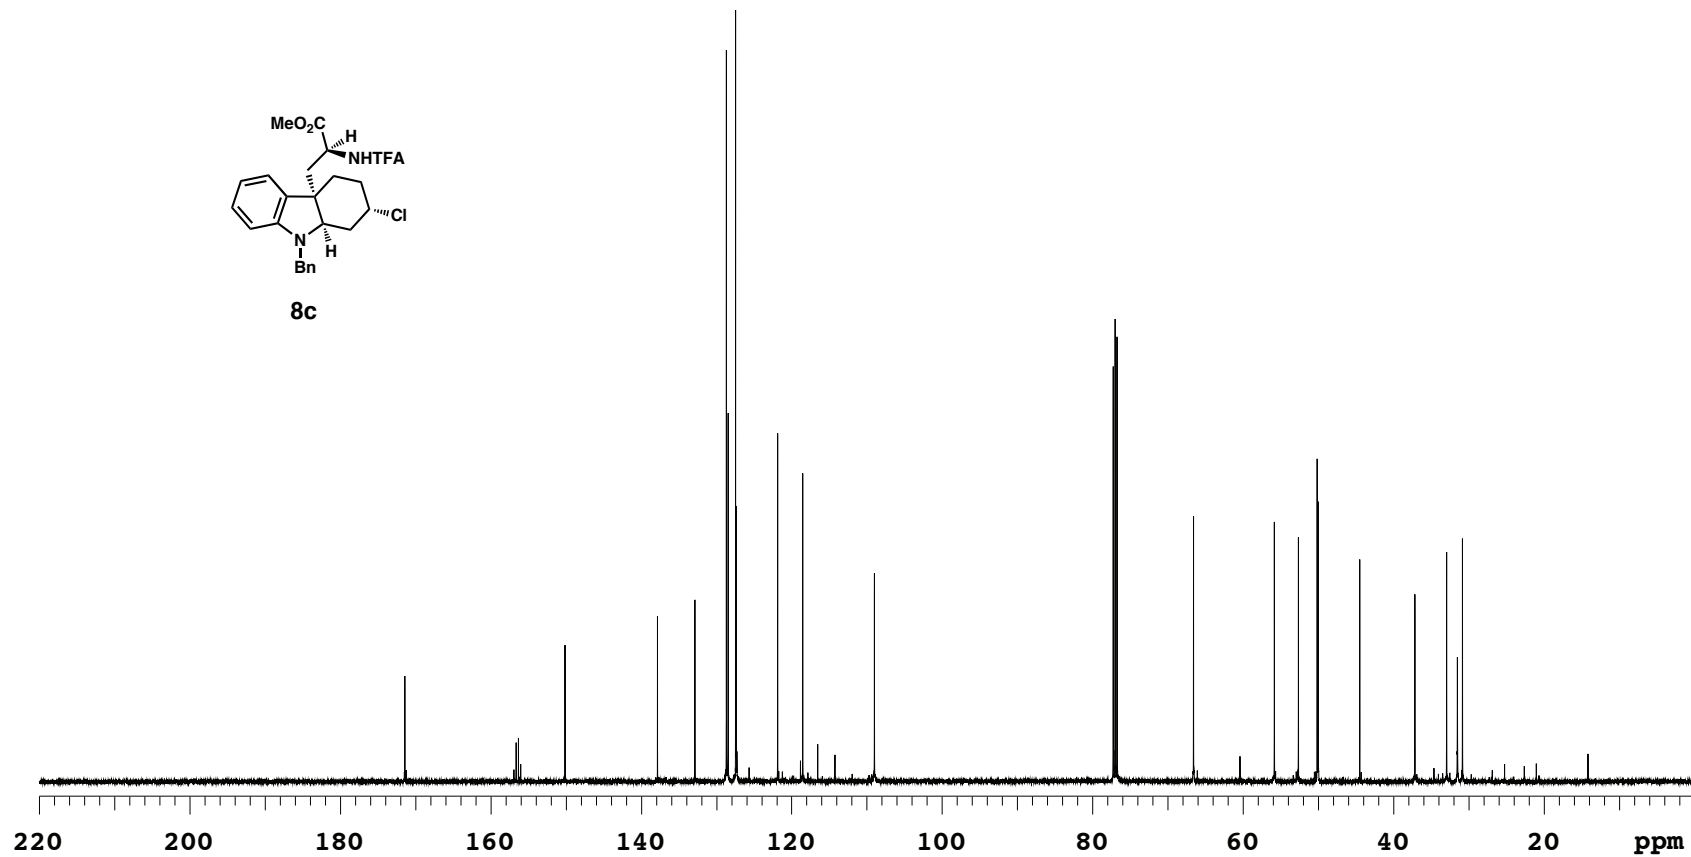

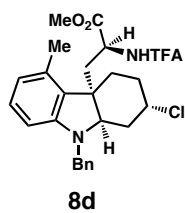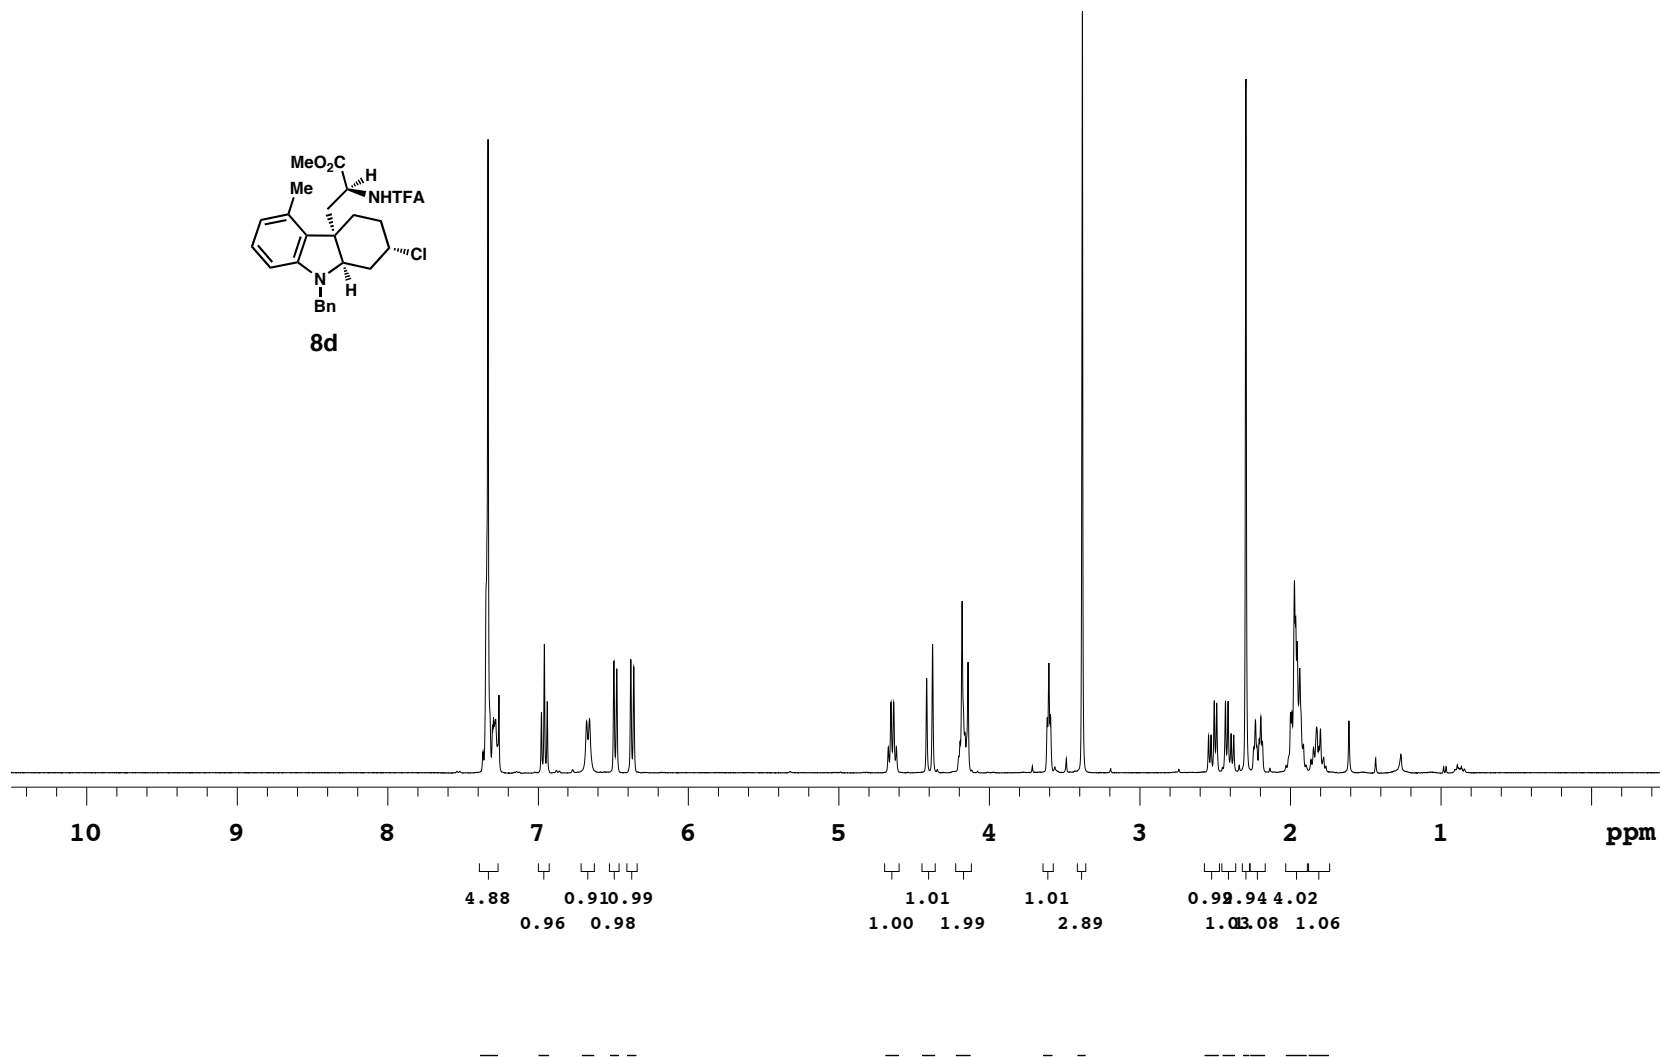

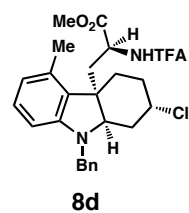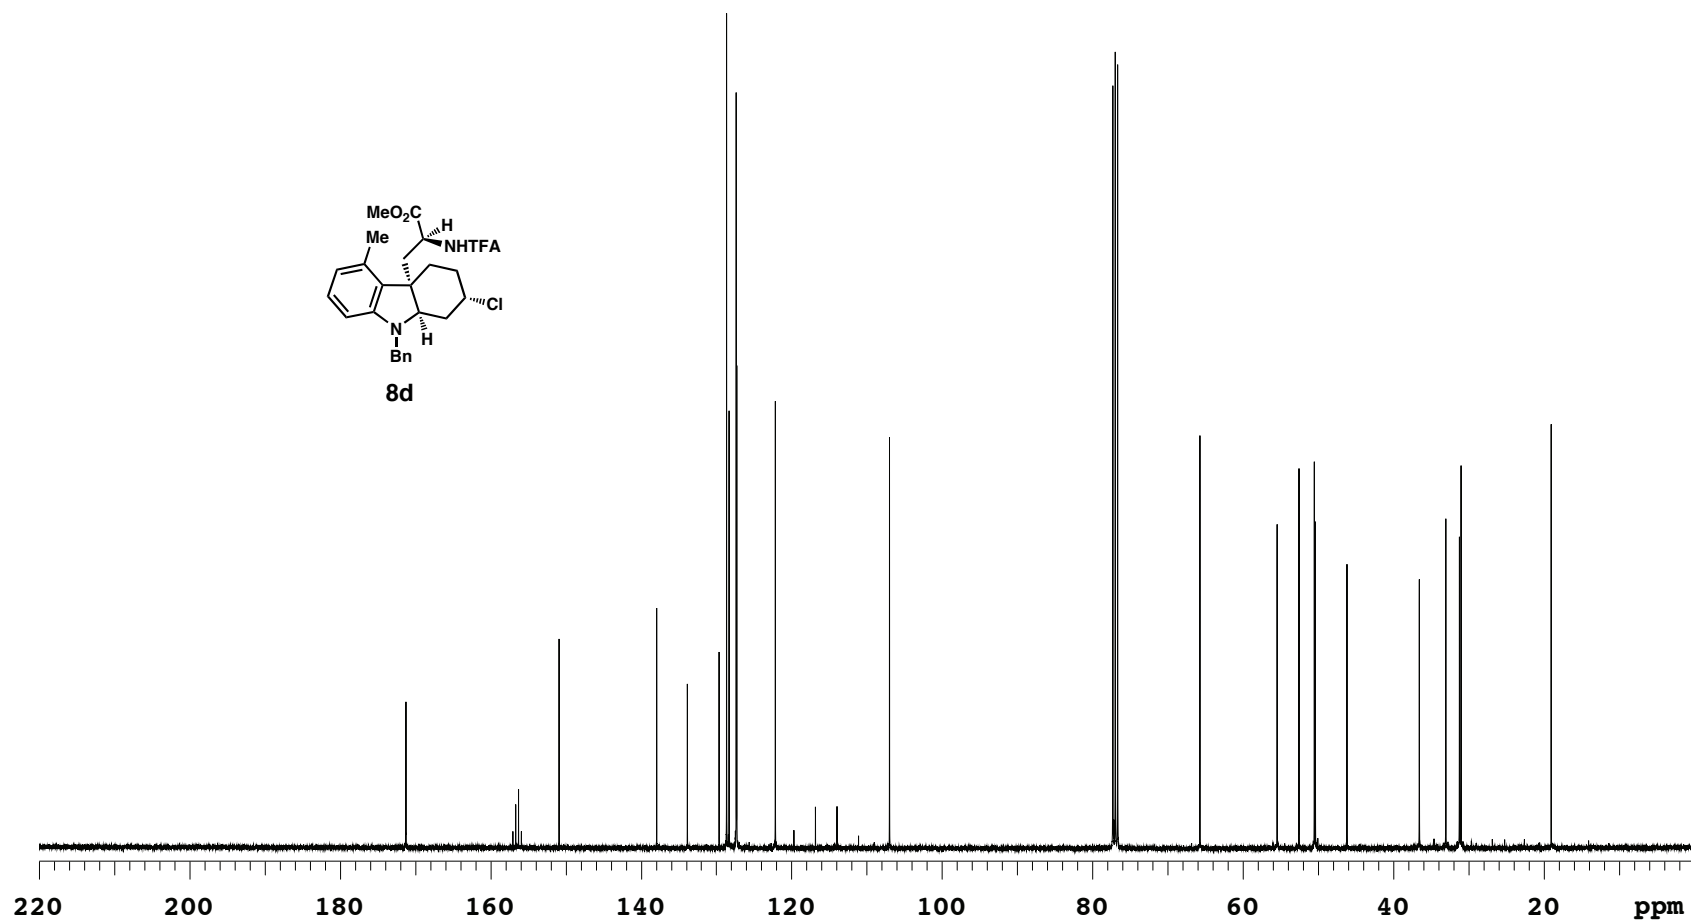

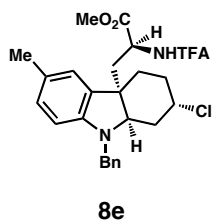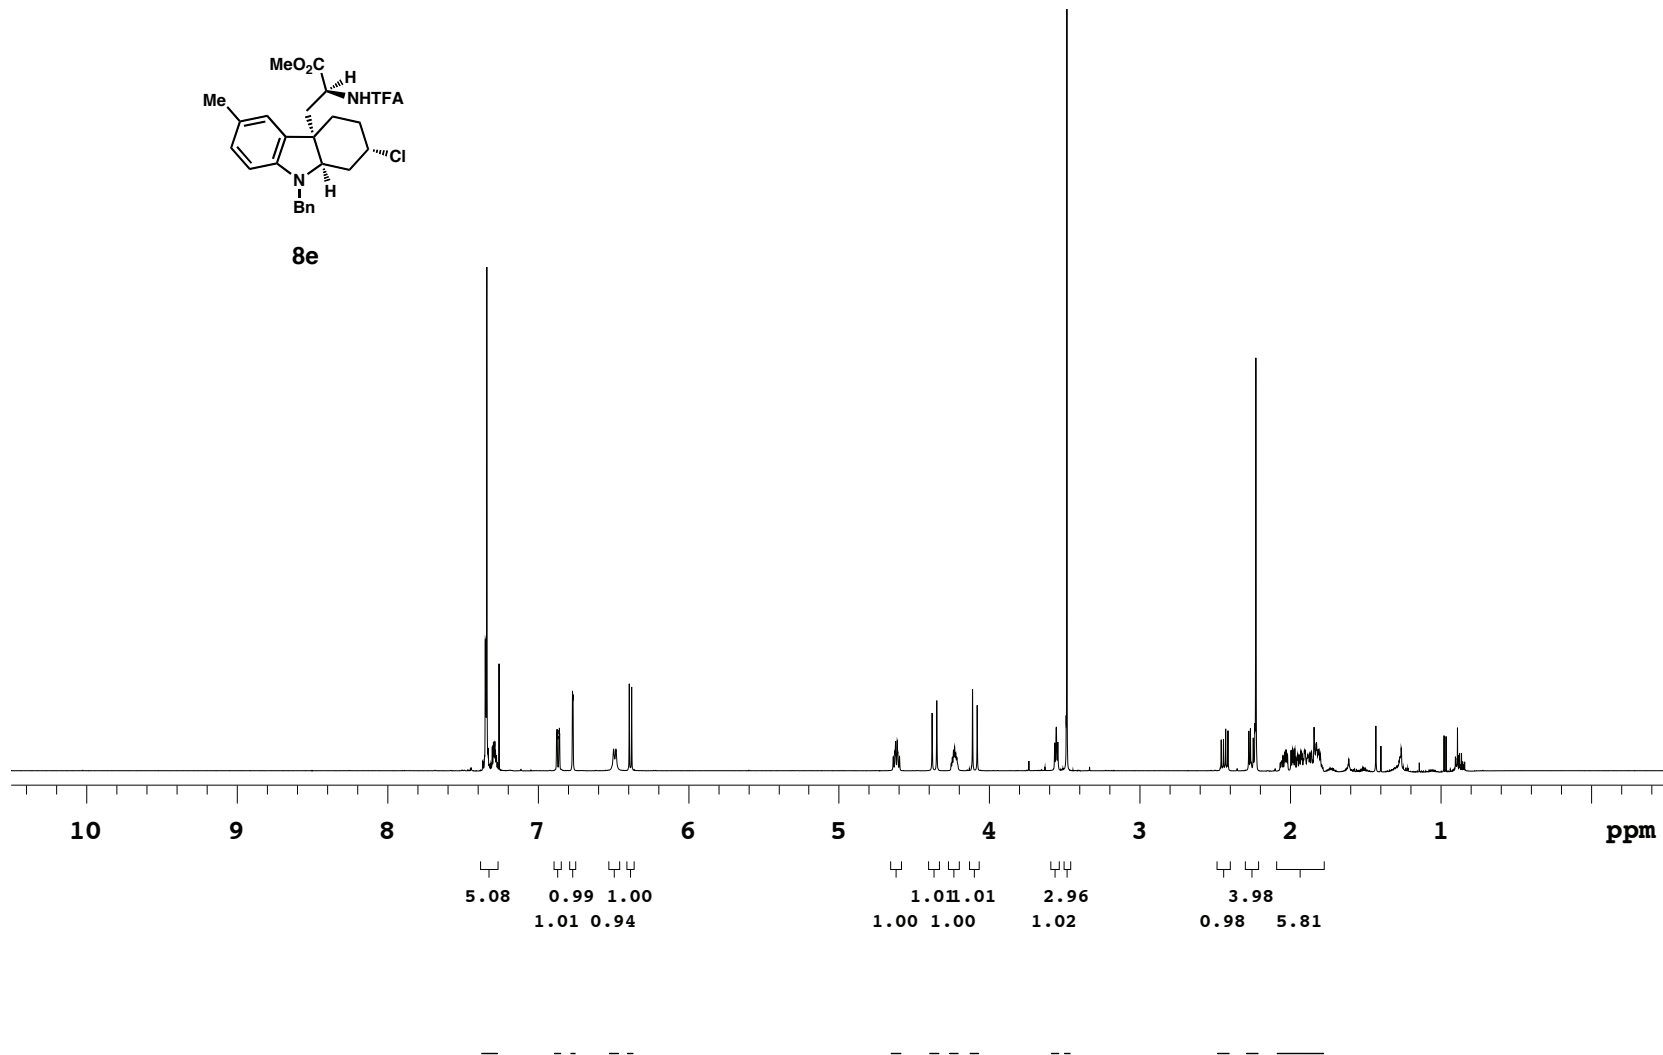

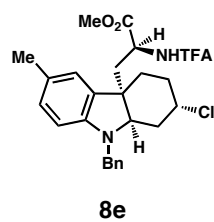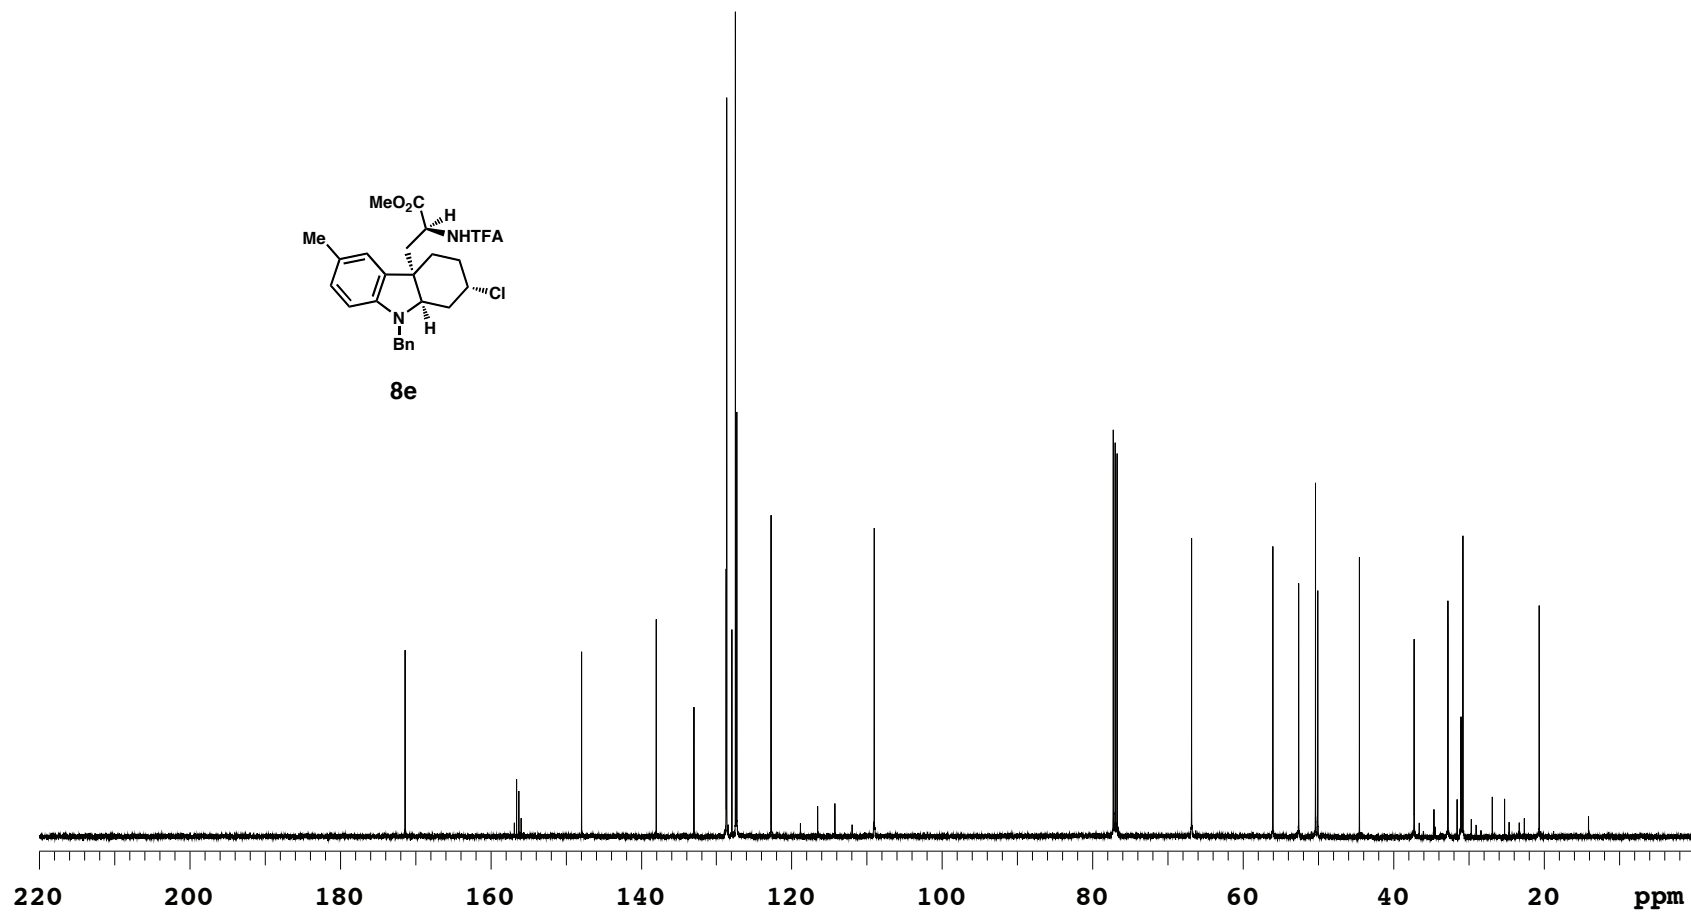



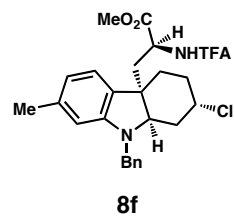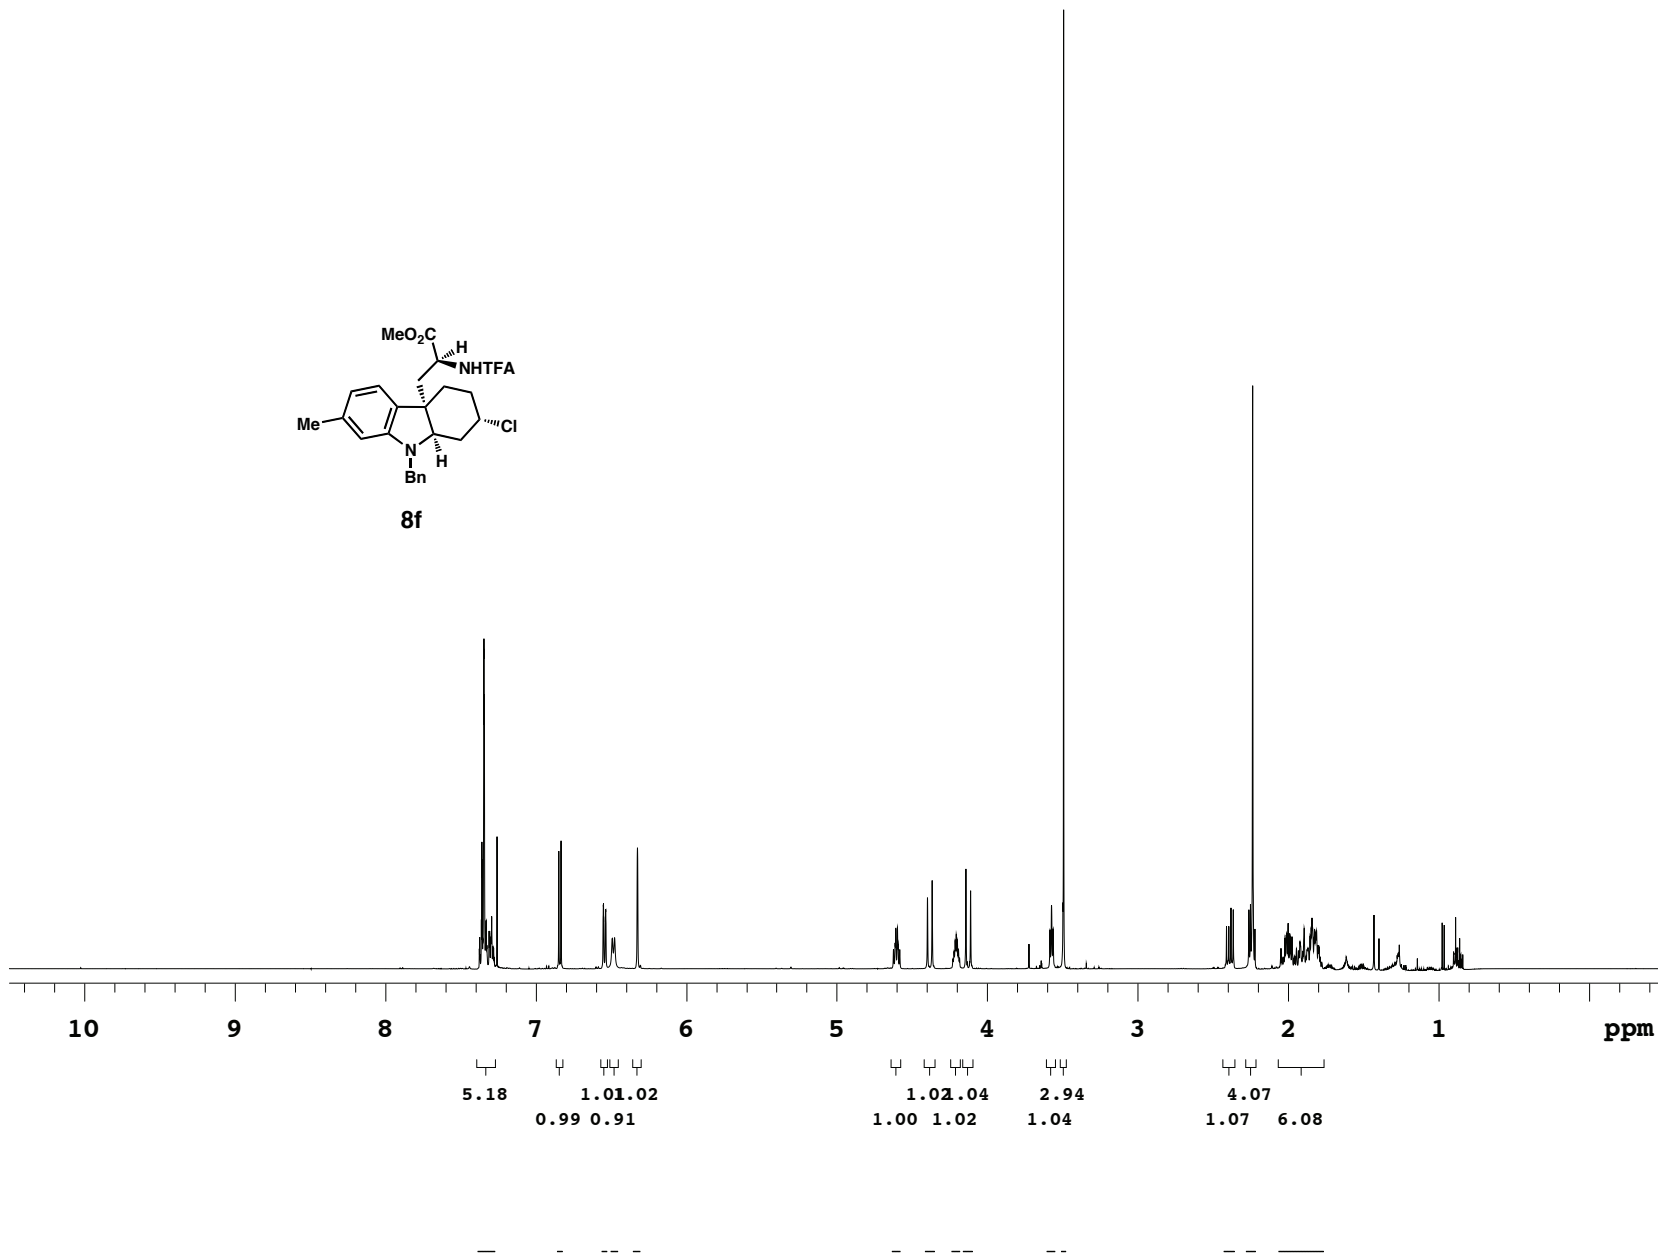

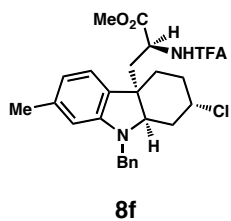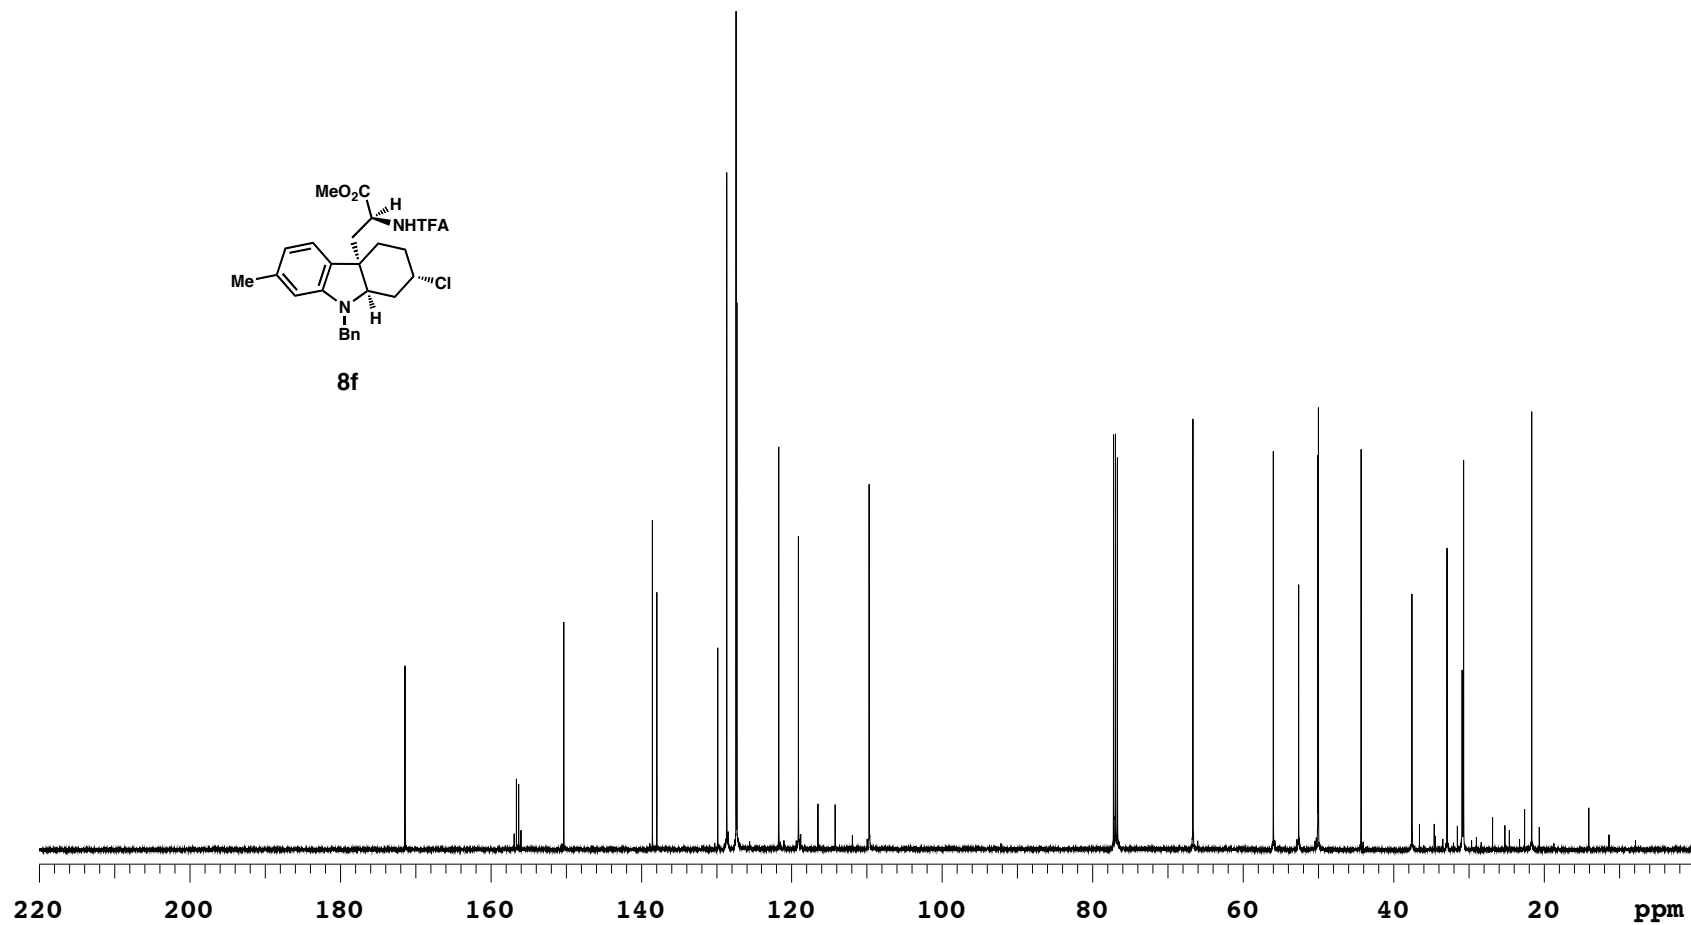

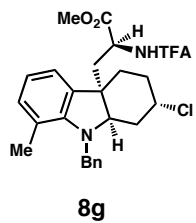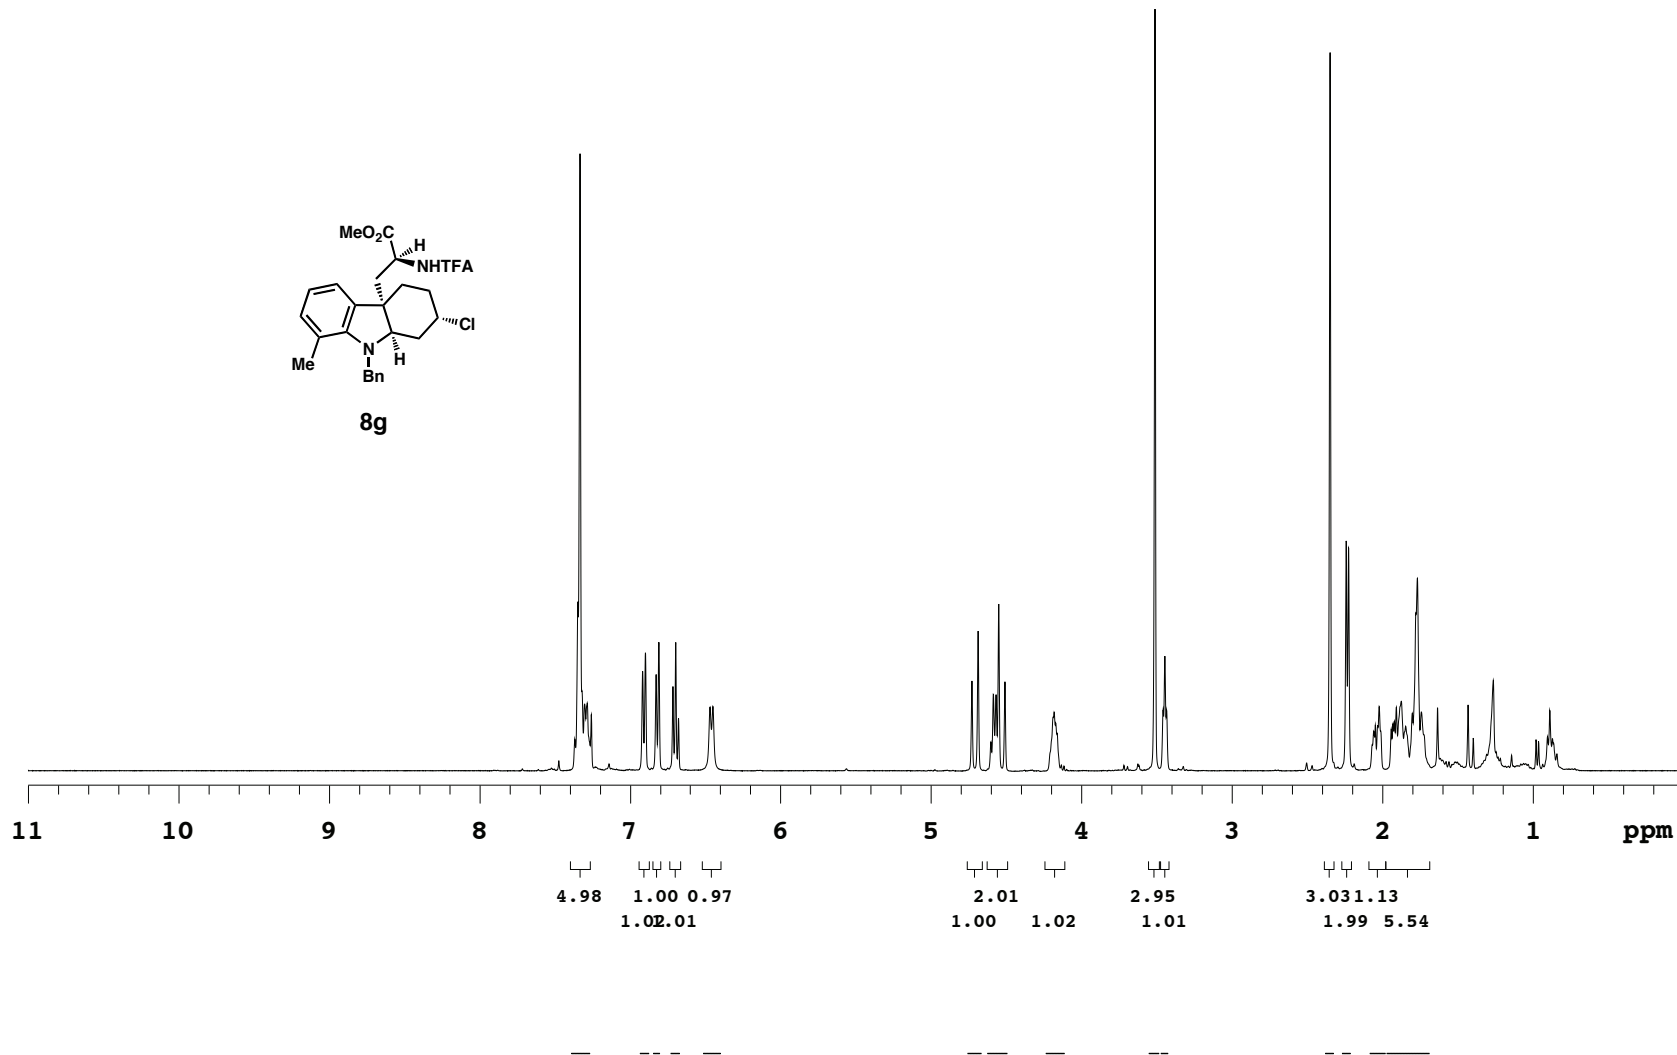

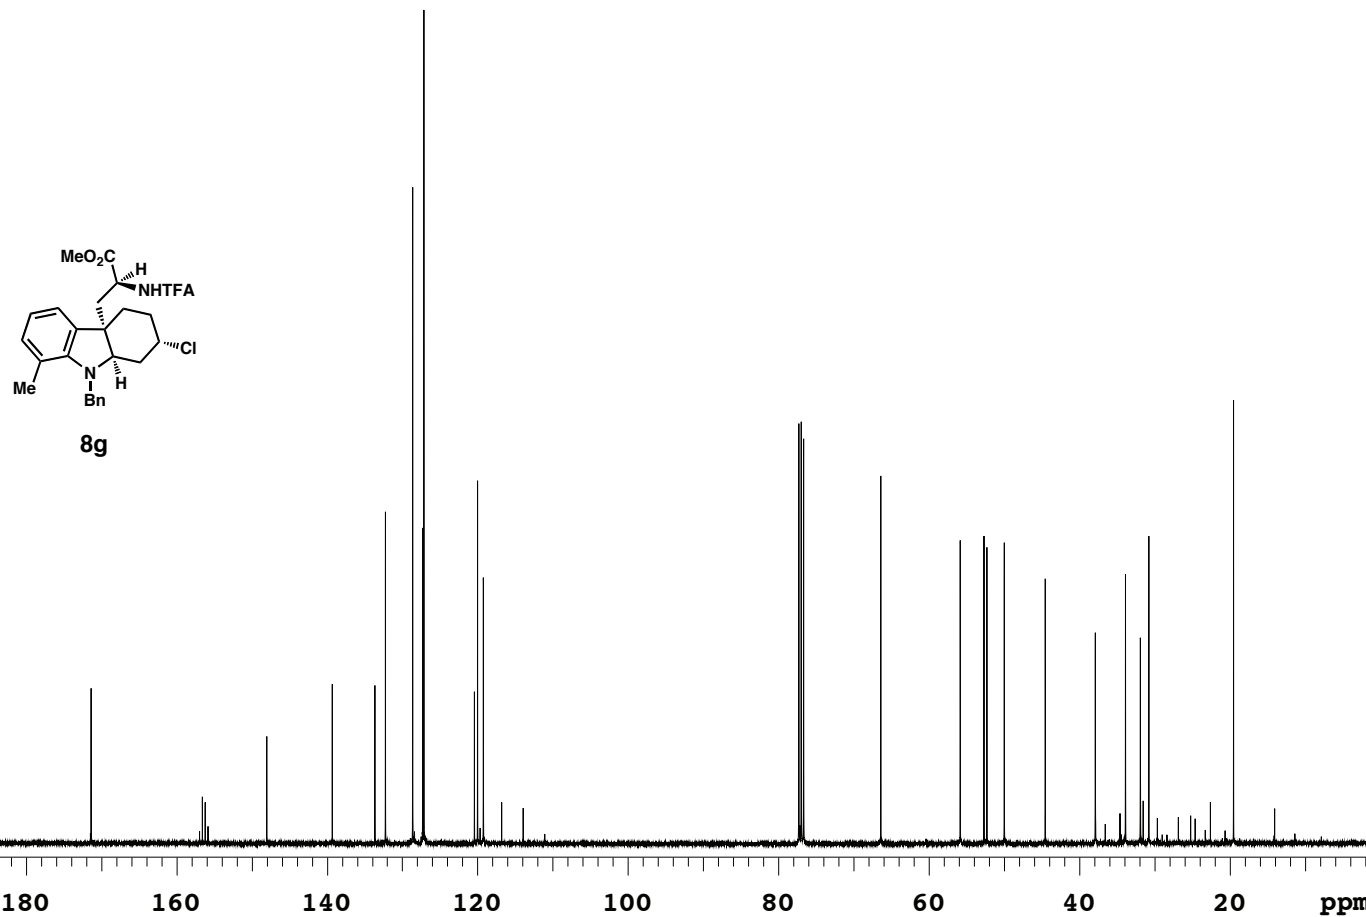

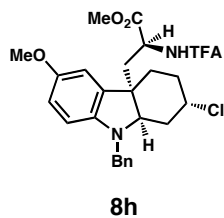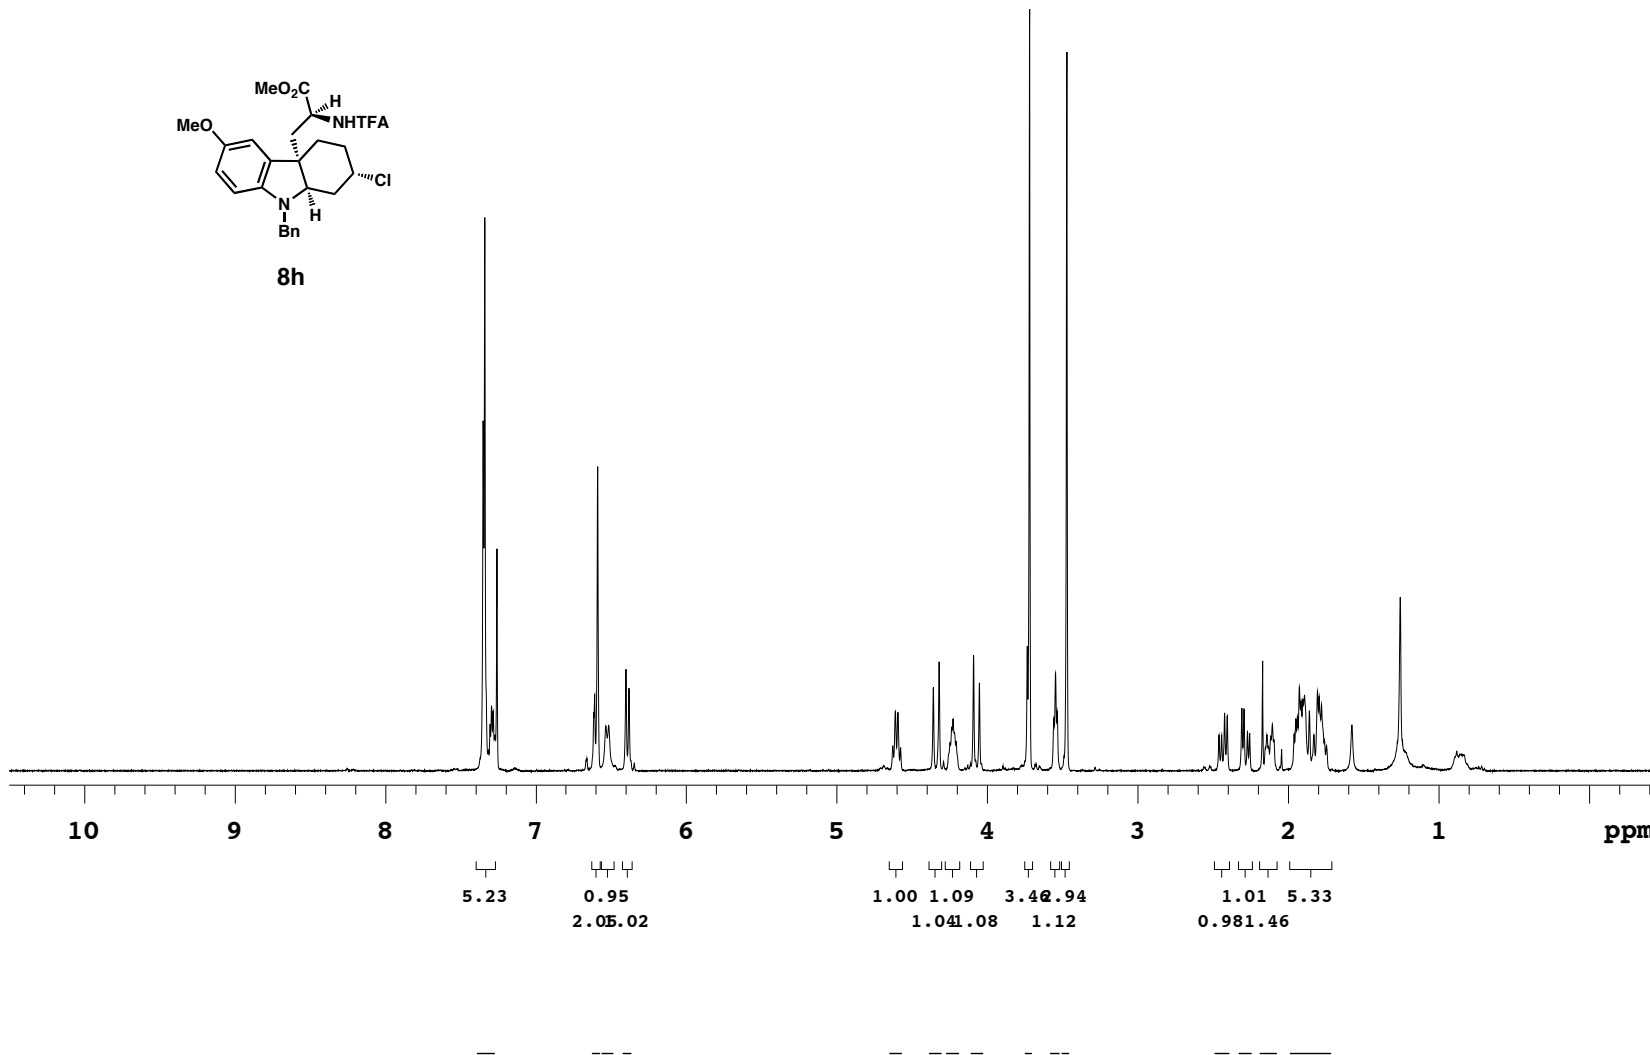

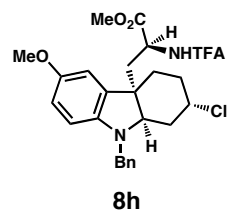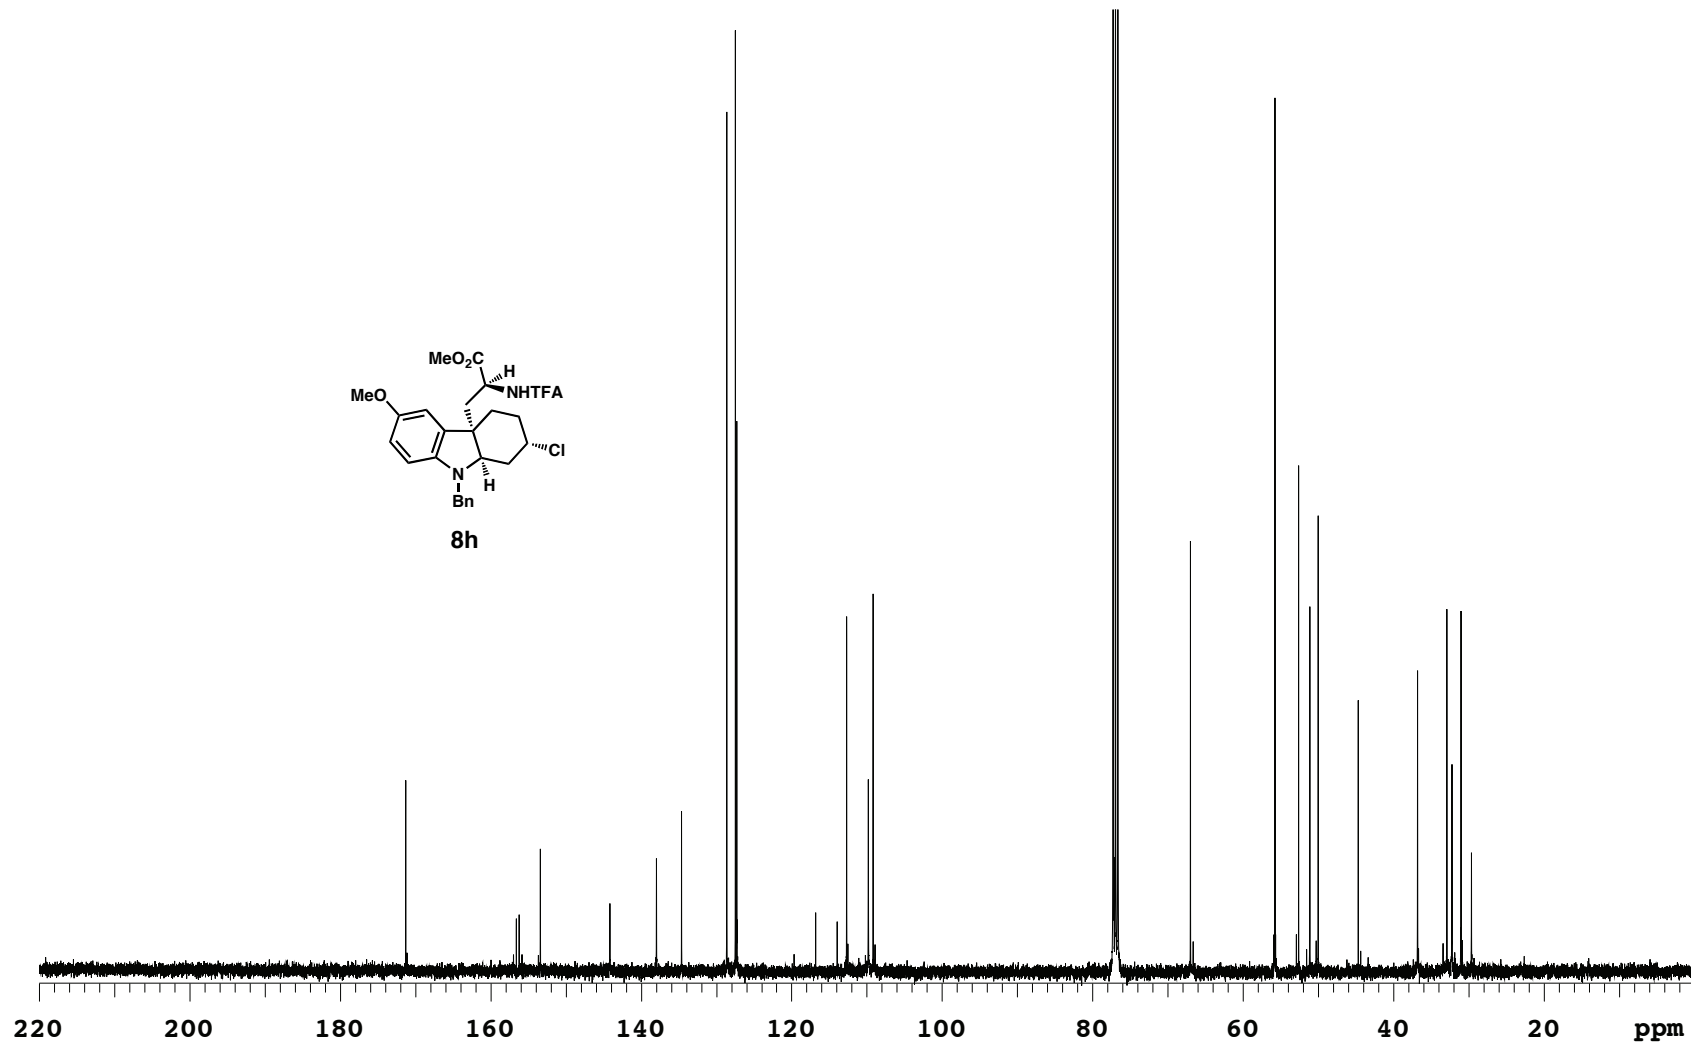

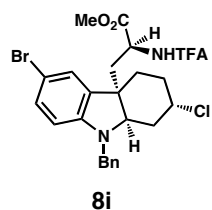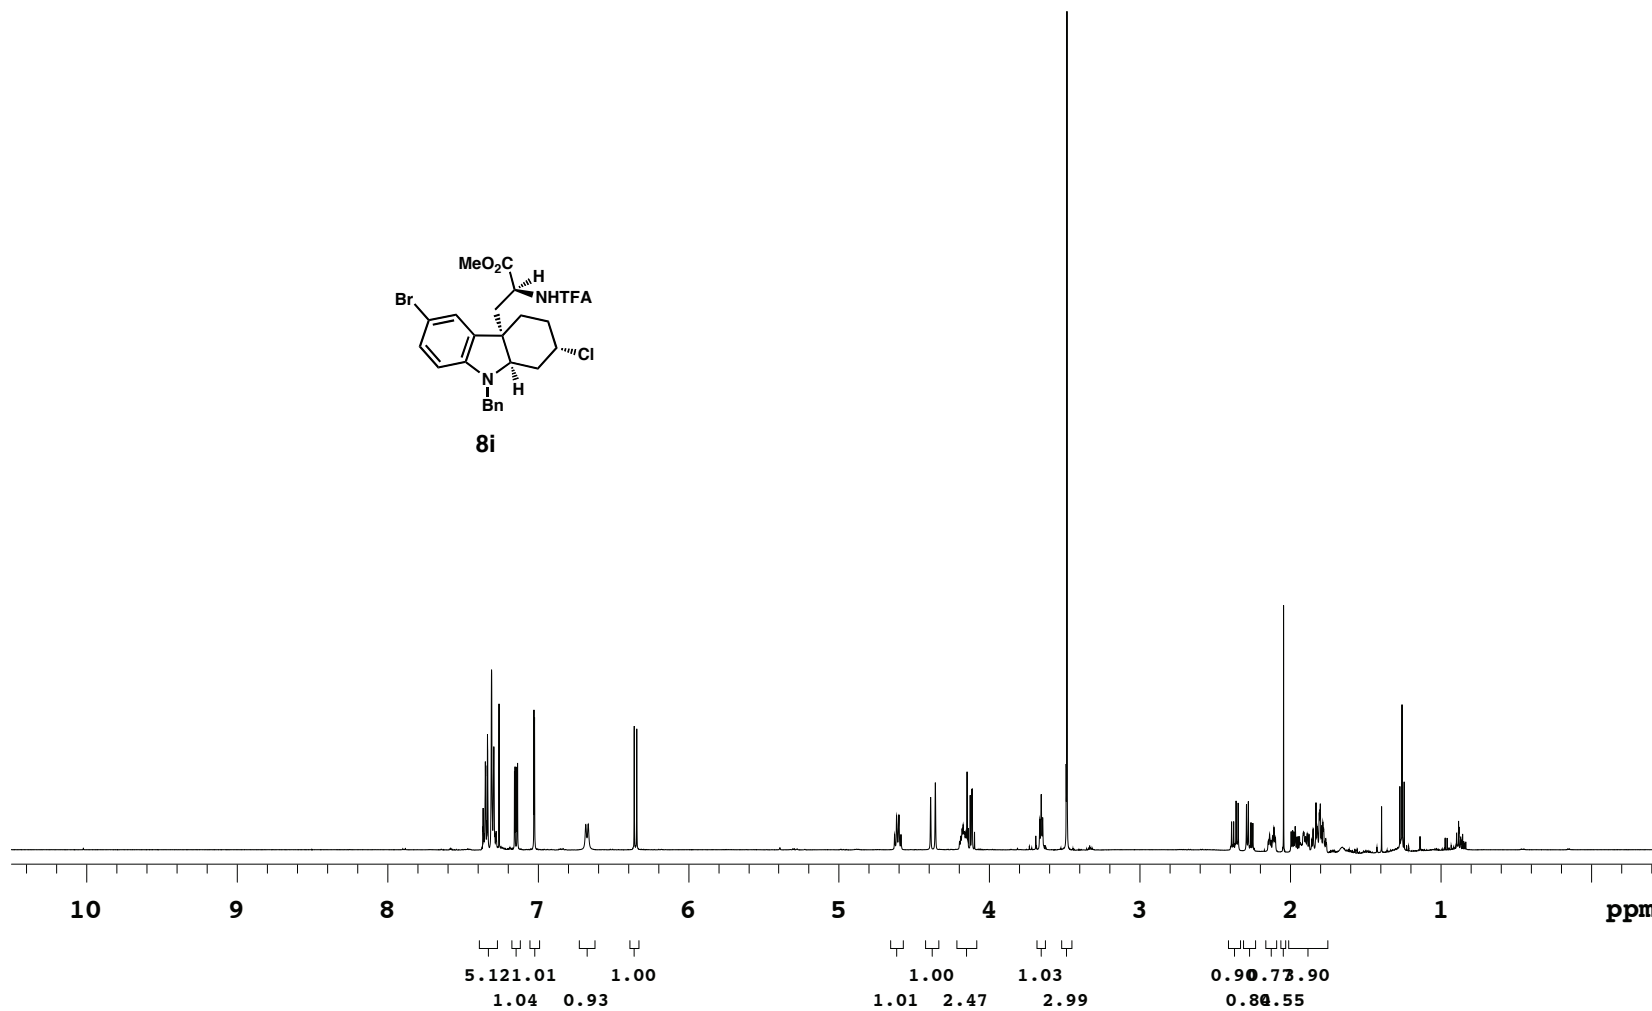

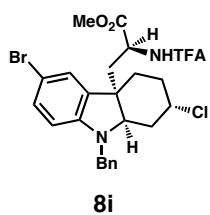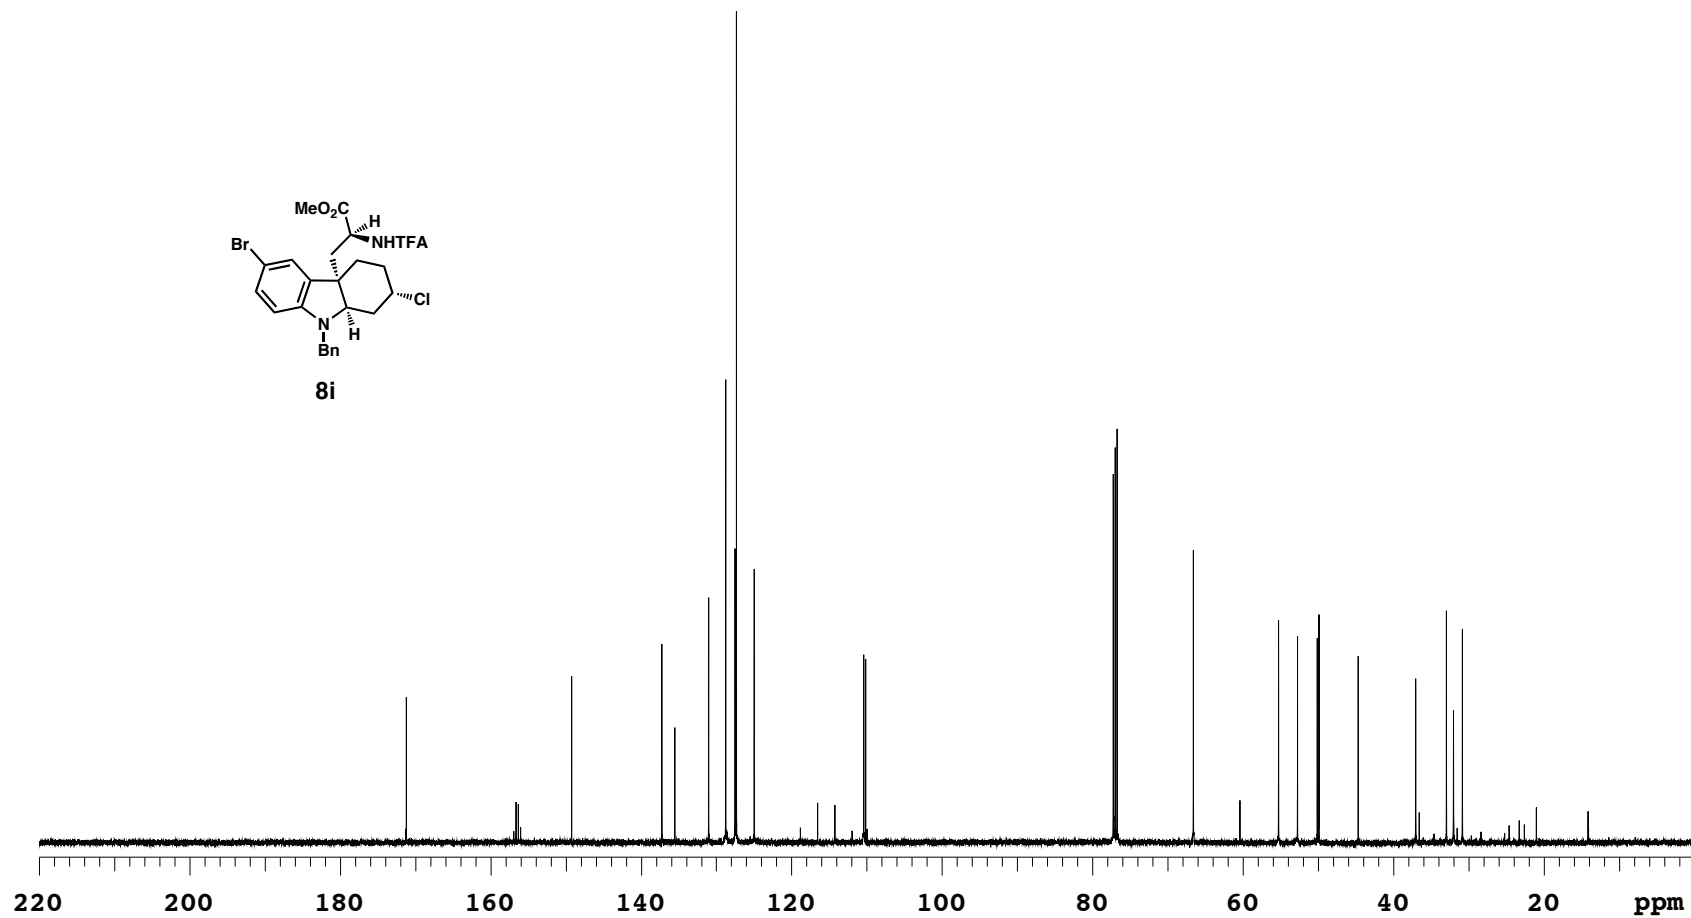



Current Data Parameters  
NAME BED2-28char2  
EXPNO 1  
PROCNO 1

F2 - Acquisition Parameters  
Date\_ 20150217  
Time 19.45  
INSTRUM spect  
PROBHD 5 mm CPPBBO BB  
PULPROG zg30  
TD 65536  
SOLVENT CDCl3  
NS 16  
DS 2  
SWH 8012.820 Hz  
FIDRES 0.122266 Hz  
AQ 4.0894465 sec  
RG 197.44  
DW 62.400 usec  
DE 10.00 usec  
TE 298.1 K  
D1 1.00000000 sec  
TD0 1

==== CHANNEL f1 =====  
SFO1 400.1324710 MHz  
NUC1 1H  
P1 11.70 usec  
PLW1 7.00000000 W

F2 - Processing parameters  
SI 65536  
SF 400.1300400 MHz  
WDW EM  
SSB 0  
LB 0.30 Hz  
GB 0  
PC 1.00

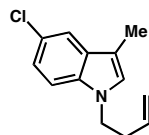

9b

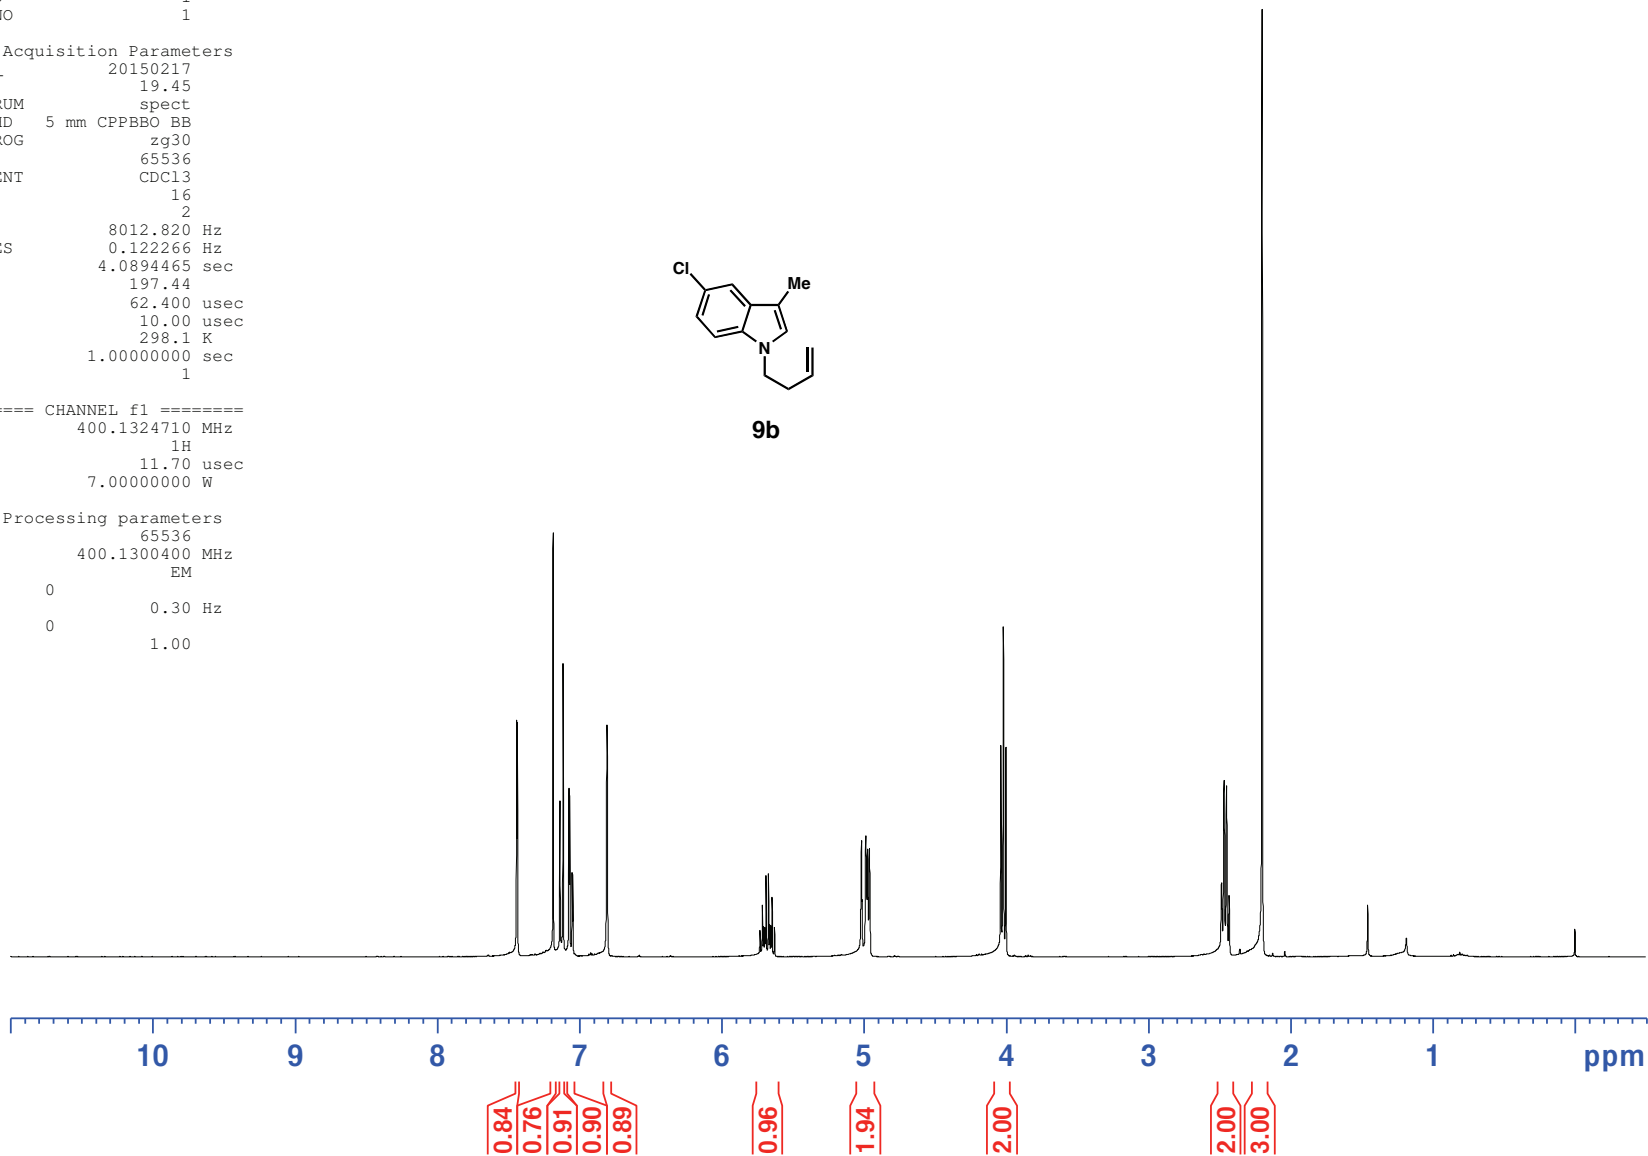

Current Data Parameters  
NAME BED2-28char2  
EXPNO 2  
PROCNO 1

F2 - Acquisition Parameters  
Date\_ 20150217  
Time 20.01  
INSTRUM spect  
PROBHD 5 mm CPPBBO BB  
PULPROG zgpg30  
TD 65536  
SOLVENT CDCl3  
NS 896  
DS 2  
SWH 24038.461 Hz  
FIDRES 0.366798 Hz  
AQ 1.3631488 sec  
RG 55.48  
DW 20.800 usec  
DE 82.37 usec  
TE 298.2 K  
D1 2.0000000 sec  
D11 0.0300000 sec  
TD0 7

===== CHANNEL f1 =====  
SFO1 100.6228298 MHz  
NUC1 13C  
P1 10.00 usec  
PLW1 36.0000000 W

===== CHANNEL f2 =====  
SFO2 400.1316005 MHz  
NUC2 1H  
CPDPRG[2] waltz16  
PCPD2 90.00 usec  
PLW2 7.0000000 W  
PLW12 0.1203300 W  
PLW13 0.0974680 W

F2 - Processing parameters  
SI 32768  
SF 100.6127685 MHz  
WDW no  
SSB 0  
LB 0 Hz  
GB 0  
PC 1.40

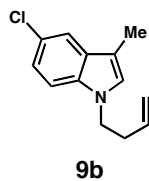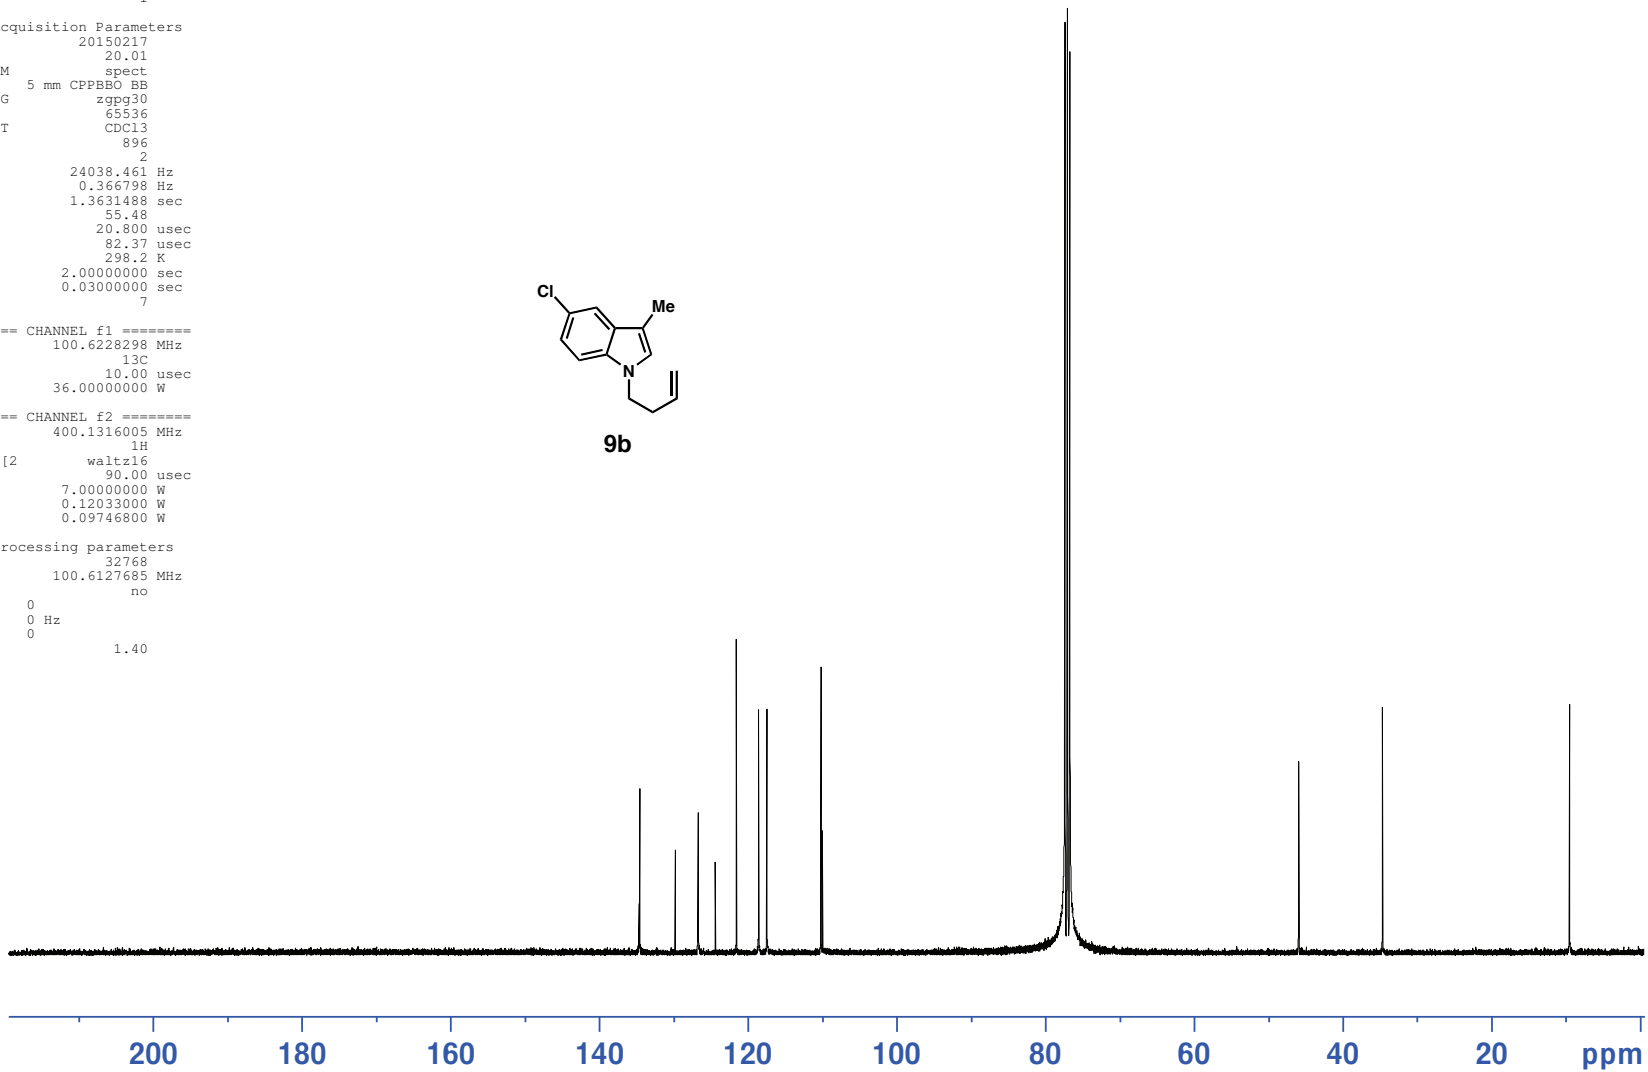

Current Data Parameters  
NAME BED2-53char  
EXPNO 1  
PROCNO 1

F2 - Acquisition Parameters  
Date\_ 20150222  
Time 20.32  
INSTRUM spect  
PROBHD 5 mm CPPBBO BB  
PULPROG zg30  
TD 65536  
SOLVENT CDCl3  
NS 16  
DS 2  
SWH 8012.820 Hz  
FIDRES 0.122266 Hz  
AQ 4.0894465 sec  
RG 197.44  
DW 62.400 usec  
DE 10.00 usec  
TE 298.2 K  
D1 1.00000000 sec  
TD0 1

==== CHANNEL f1 =====  
SFO1 400.1324710 MHz  
NUC1 1H  
P1 11.70 usec  
PLW1 7.00000000 W

F2 - Processing parameters  
SI 65536  
SF 400.1300098 MHz  
WDW EM  
SSB 0  
LB 0.30 Hz  
GB 0  
PC 1.00

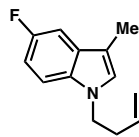

9c

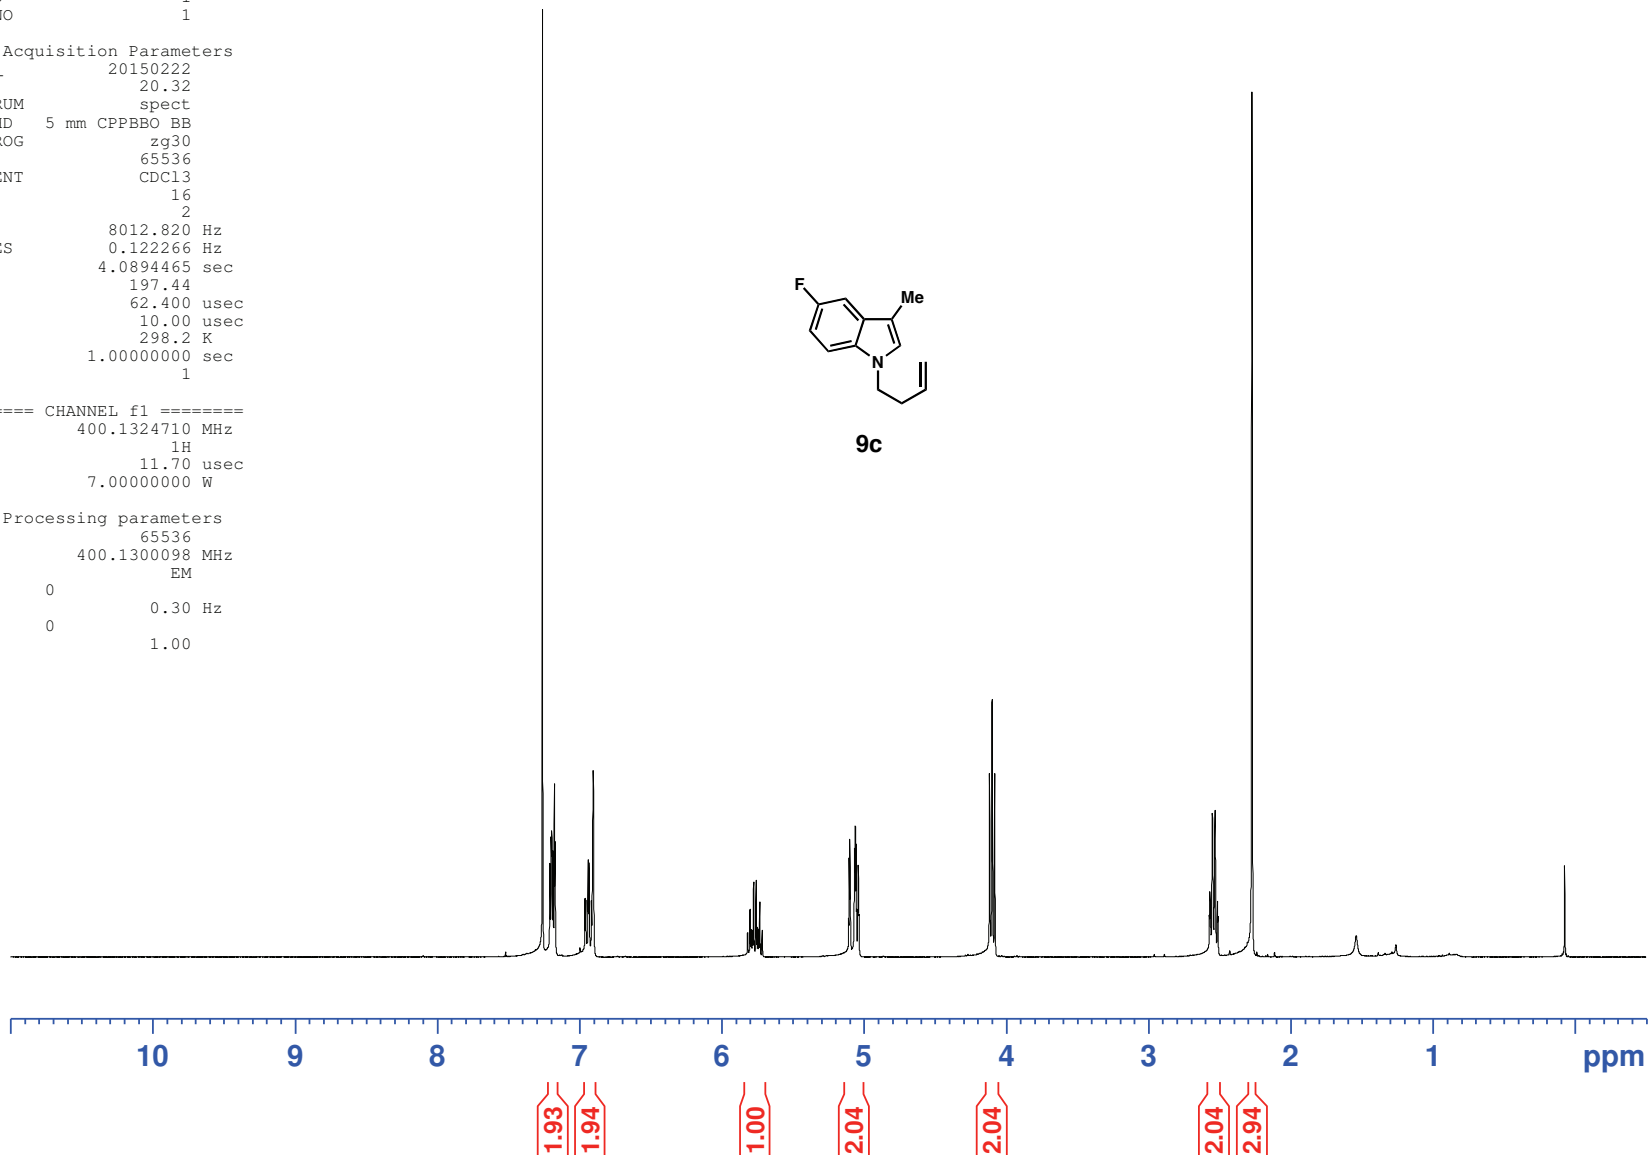

Current Data Parameters  
NAME BED2-53char  
EXPNO 2  
PROCNO 1

F2 - Acquisition Parameters  
Date\_ 20150222  
Time 20.40  
INSTRUM spect  
PROBHD 5 mm CPPBBO BB  
PULPROG zgpg30  
TD 65536  
SOLVENT CDCl3  
NS 896  
DS 2  
SWH 24038.461 Hz  
FIDRES 0.366798 Hz  
AQ 1.3631488 sec  
RG 64.2  
DW 20.800 usec  
DE 82.37 usec  
TE 298.2 K  
D1 2.0000000 sec  
D11 0.0300000 sec  
TD0 7

=====  
CHANNEL f1  
SF01 100.6228298 MHz  
NUC1 13C  
P1 10.00 usec  
PLW1 36.0000000 W

=====  
CHANNEL f2  
SF02 400.1316005 MHz  
NUC2 1H  
CPDPRG[2] waltz16  
PCPD2 90.00 usec  
PLW2 7.0000000 W  
PLW12 0.1203300 W  
PLW13 0.09746800 W

F2 - Processing parameters  
SI 32768  
SF 100.6127685 MHz  
WDW EM  
SSB 0  
LB 1.00 Hz  
GB 0  
PC 1.40

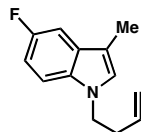

9c

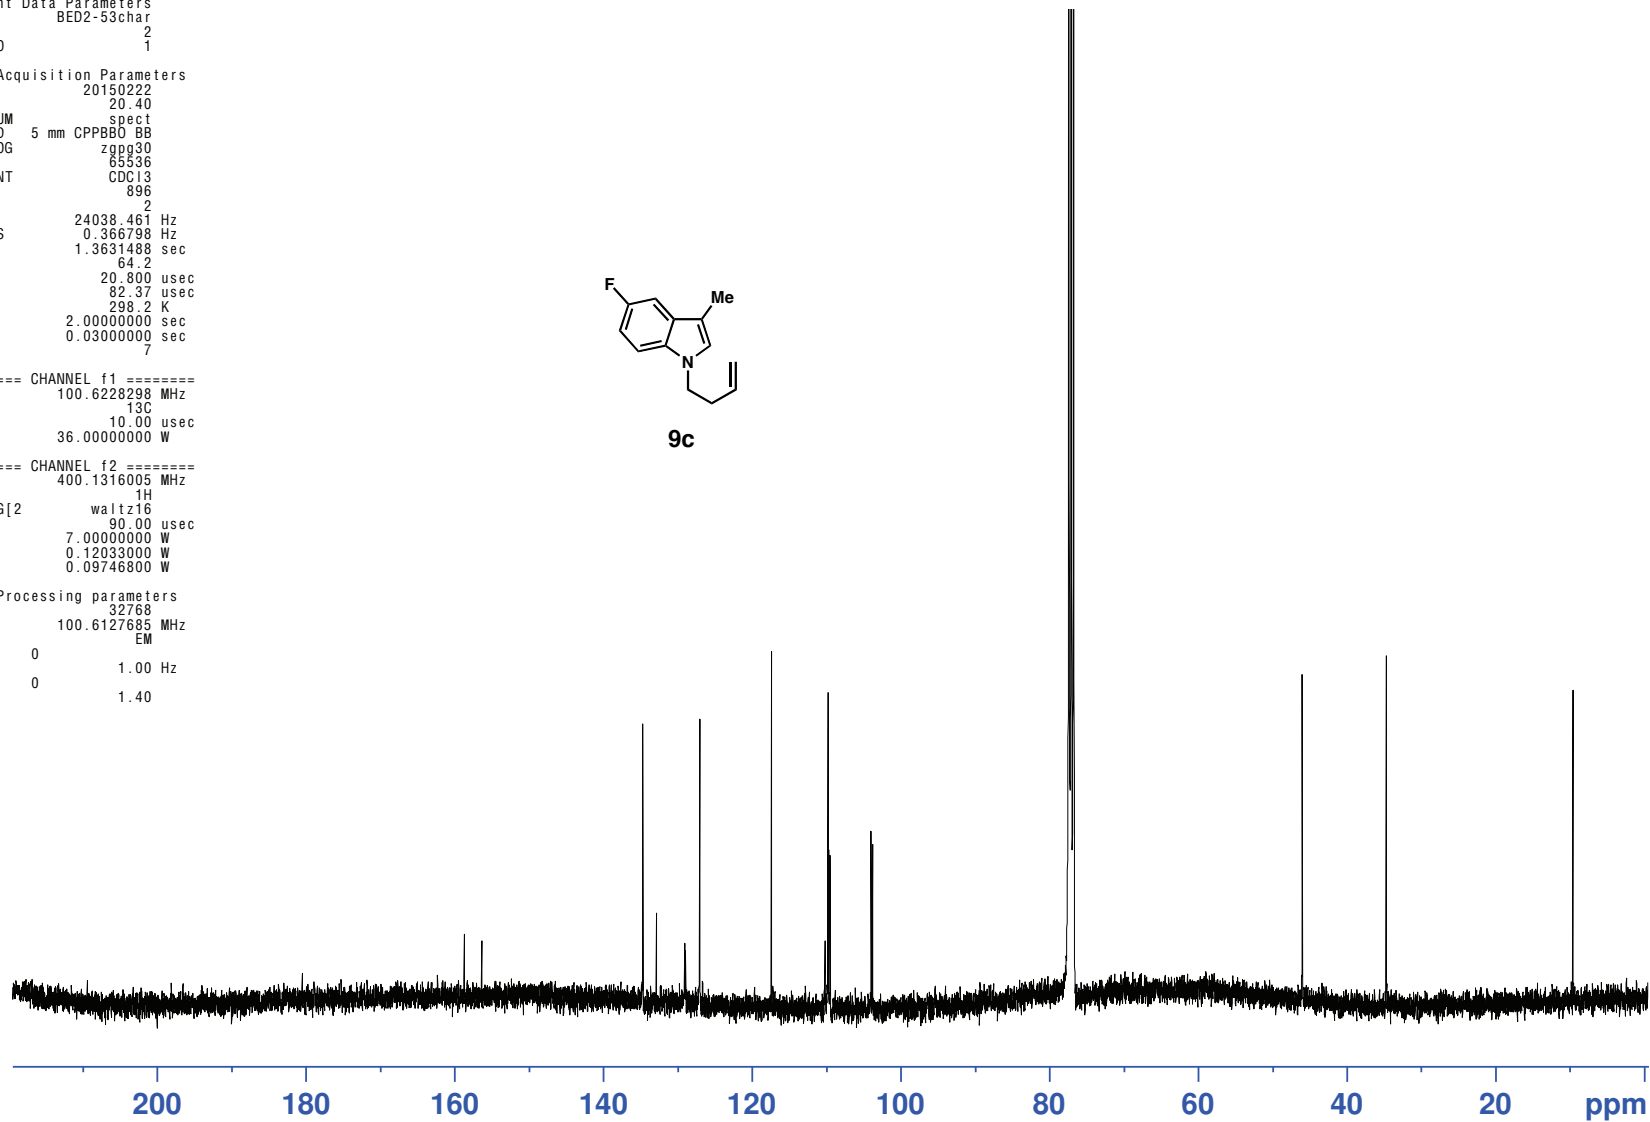

Current Data Parameters  
NAME BED2-26char  
EXPNO 1  
PROCNO 1

F2 - Acquisition Parameters  
Date\_ 20150216  
Time 17.50  
INSTRUM spect  
PROBHD 5 mm CPPBBO BB  
PULPROG zg30  
TD 65536  
SOLVENT CDCl3  
NS 16  
DS 2  
SWH 8012.820 Hz  
FIDRES 0.122266 Hz  
AQ 4.0894465 sec  
RG 156.15  
DW 62.400 usec  
DE 10.00 usec  
TE 298.2 K  
D1 1.00000000 sec  
TD0 1

==== CHANNEL f1 =====  
SFO1 400.1324710 MHz  
NUC1 1H  
P1 11.70 usec  
PLW1 7.00000000 W

F2 - Processing parameters  
SI 65536  
SF 400.1300097 MHz  
WDW EM  
SSB 0  
LB 0.30 Hz  
GB 0  
PC 1.00

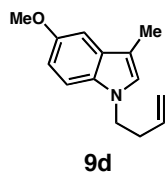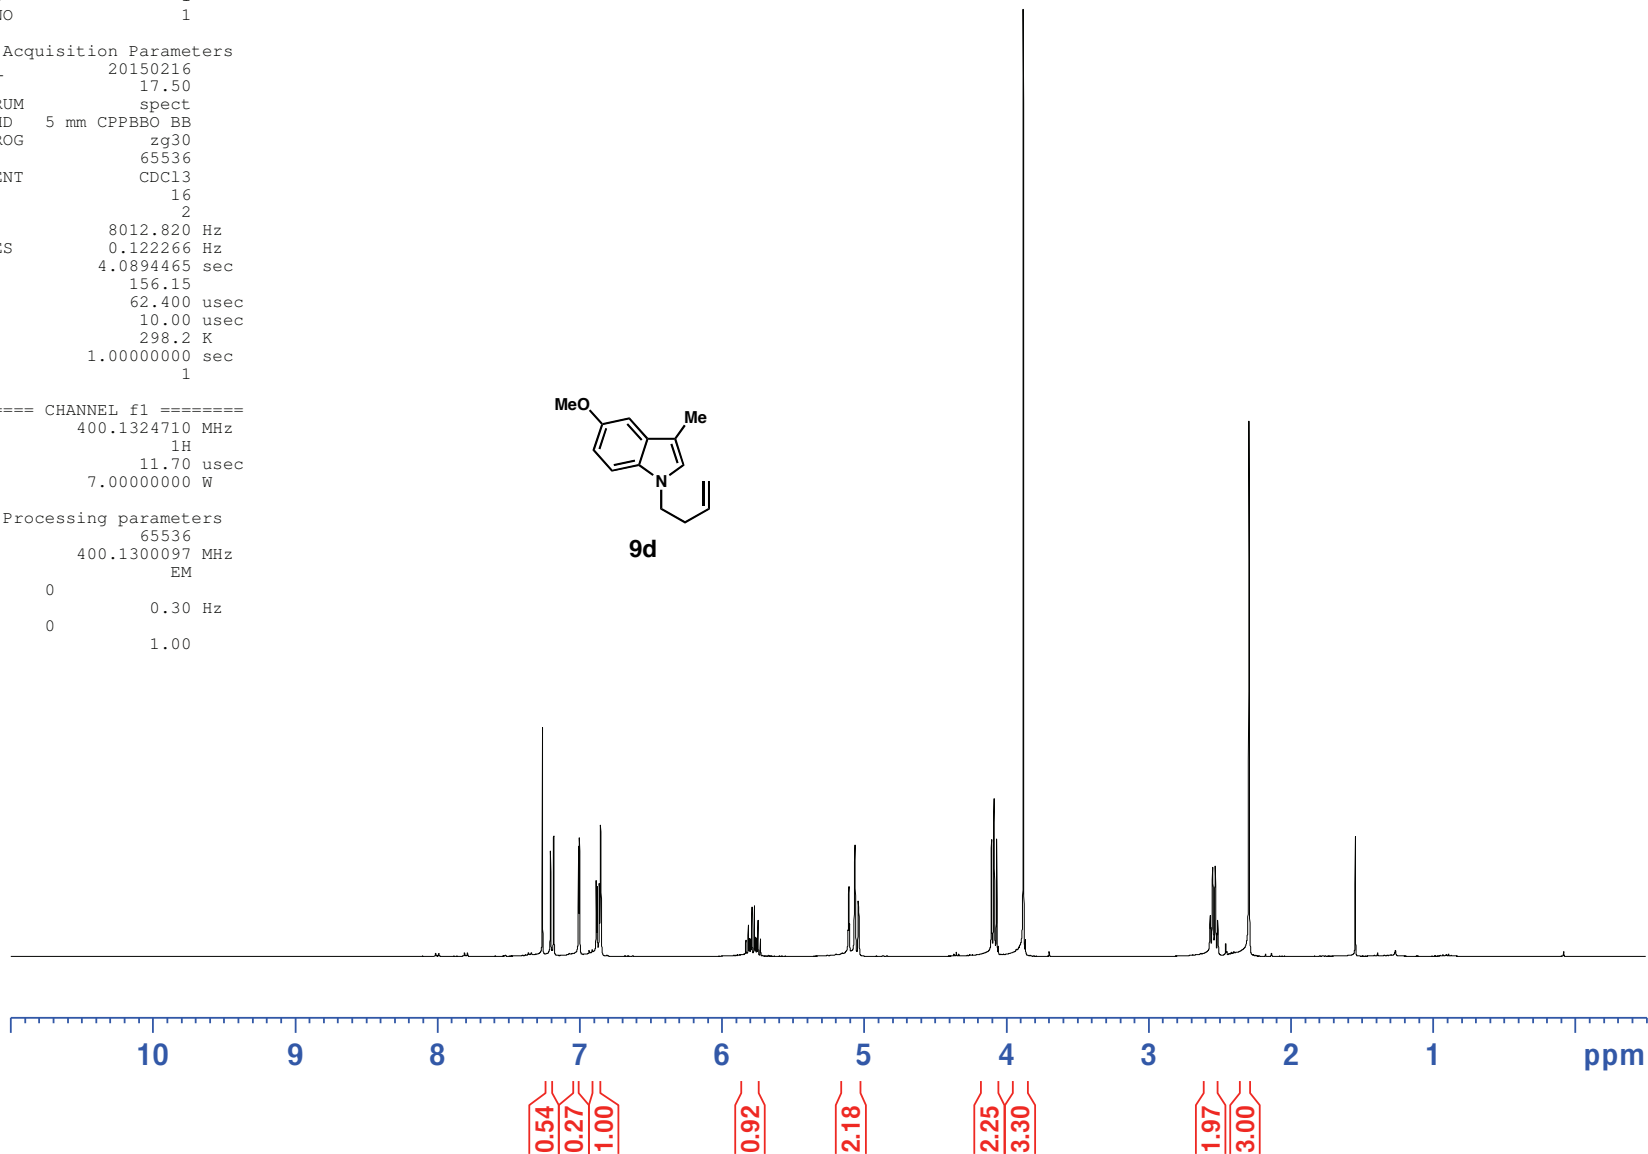

Current Data Parameters  
NAME BED2-26char  
EXPNO 2  
PROCNO 1

F2 - Acquisition Parameters  
Date\_ 20150216  
Time 17.58  
INSTRUM spect  
PROBHD 5 mm CPPBBO BB  
PULPROG zgpg30  
TD 65536  
SOLVENT CDCl3  
NS 896  
DS 2  
SWH 24038.461 Hz  
FIDRES 0.366798 Hz  
AQ 1.3631488 sec  
RG 72.02  
DW 20.800 usec  
DE 82.37 usec  
TE 298.2 K  
D1 2.0000000 sec  
D11 0.0300000 sec  
TD0 7

==== CHANNEL f1 =====  
SFO1 100.6228298 MHz  
NUC1 13C  
P1 10.00 usec  
PLW1 36.0000000 W

==== CHANNEL f2 =====  
SFO2 400.1316005 MHz  
NUC2 1H  
CPDPRG[2] waltz16  
PCPD2 90.00 usec  
PLW2 7.0000000 W  
PLW12 0.1203300 W  
PLW13 0.0974680 W

F2 - Processing parameters  
SI 32768  
SF 100.6127685 MHz  
WDW EM  
SSB 0  
LB 1.00 Hz  
GB 0  
PC 1.40

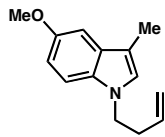

9d

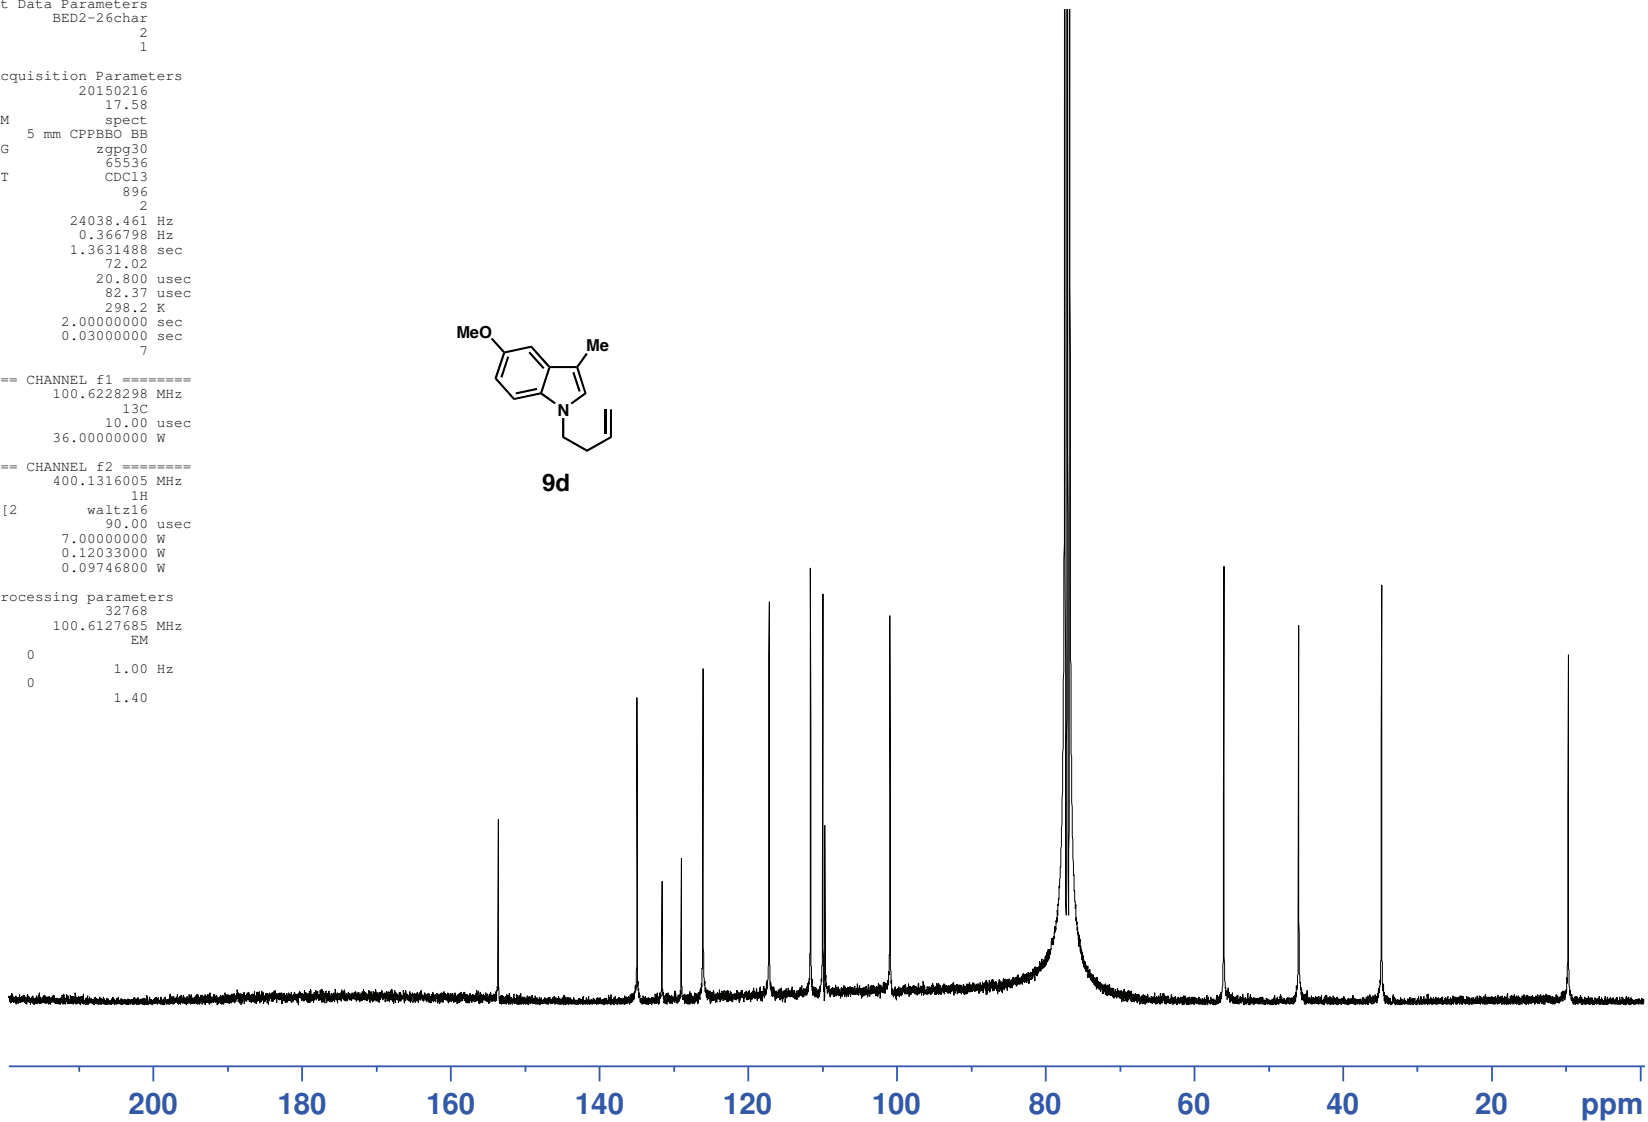

Current Data Parameters  
NAME BED1-268char  
EXPNO 1  
PROCNO 1

F2 - Acquisition Parameters  
Date\_ 20150224  
Time 16.07  
INSTRUM spect  
PROBHD 5 mm CPPBBO BB  
PULPROG zg30  
TD 65536  
SOLVENT CDCl3  
NS 16  
DS 2  
SWH 8012.820 Hz  
FIDRES 0.122266 Hz  
AQ 4.0894465 sec  
RG 30.29  
DW 62.400 usec  
DE 10.00 usec  
TE 298.2 K  
D1 1.00000000 sec  
TD0 1

==== CHANNEL f1 =====  
SFO1 400.1324710 MHz  
NUC1 1H  
P1 11.70 usec  
PLW1 7.00000000 W

F2 - Processing parameters  
SI 65536  
SF 400.1300096 MHz  
WDW EM  
SSB 0  
LB 0.30 Hz  
GB 0  
PC 1.00

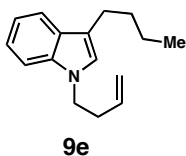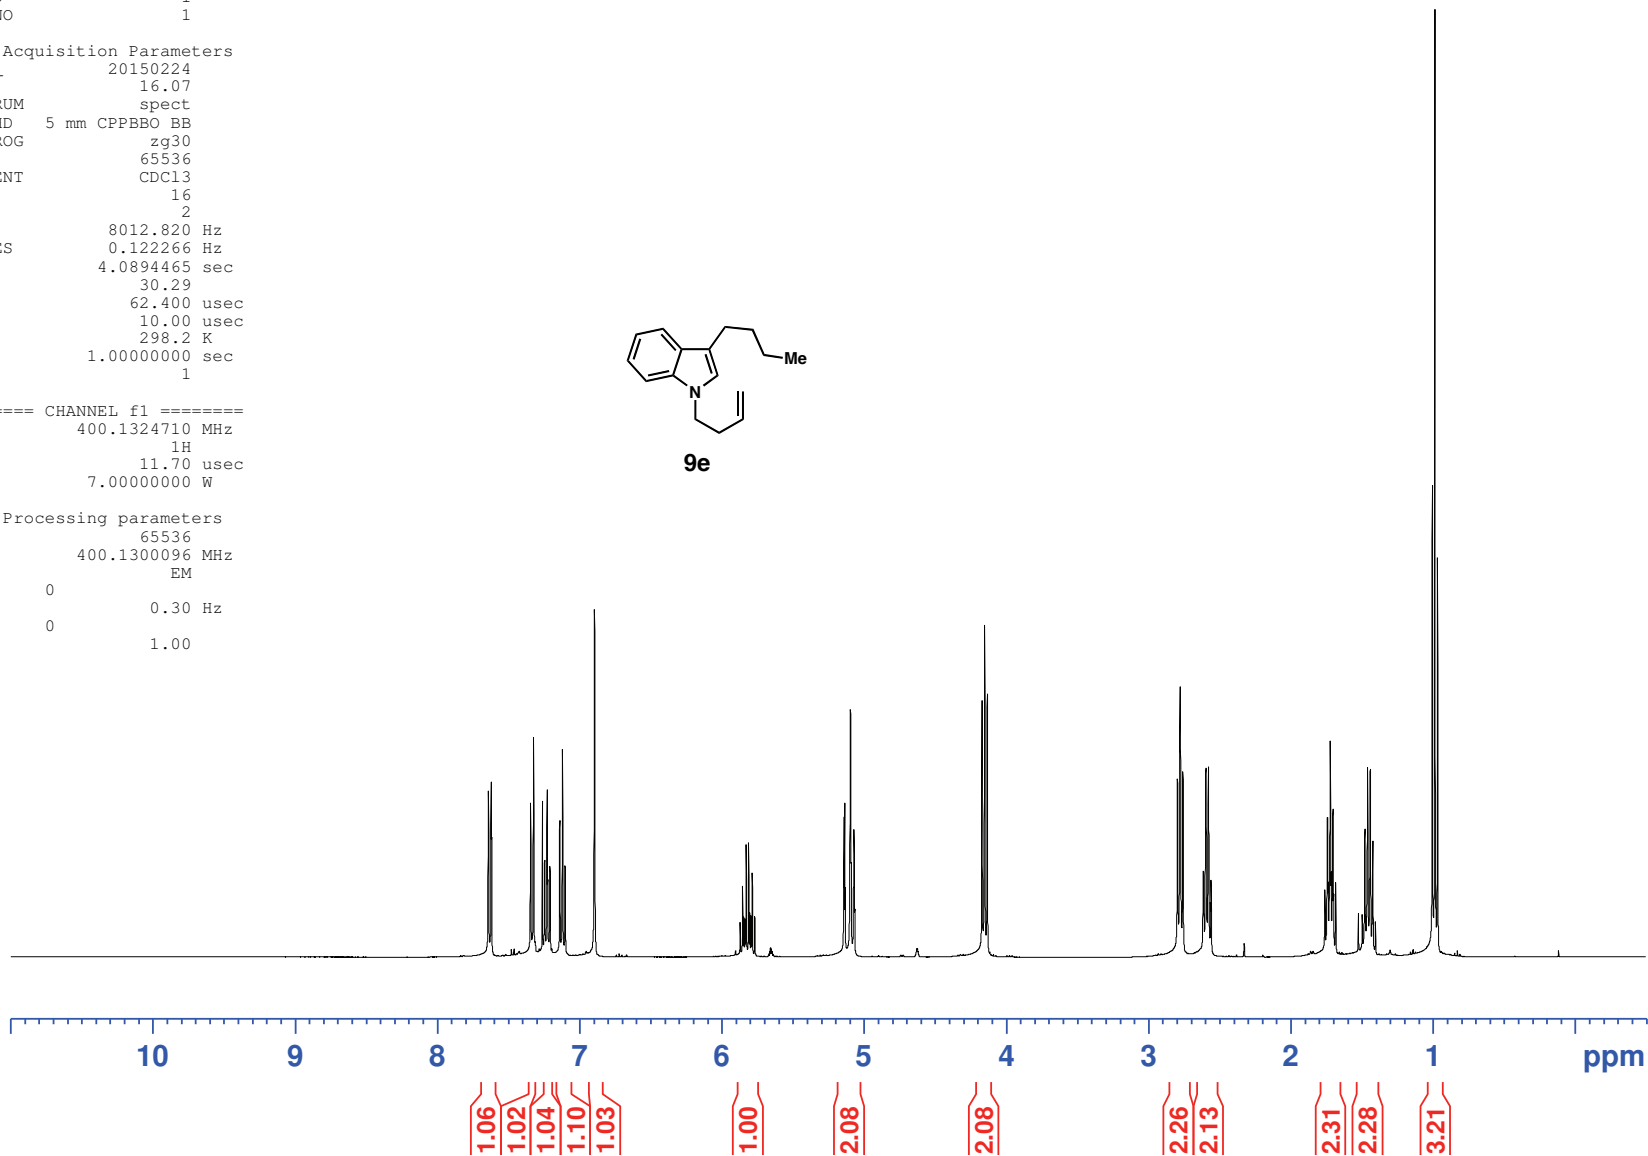

Current Data Parameters  
NAME BED1-268char  
EXPNO 2  
PROCNO 1

F2 - Acquisition Parameters  
Date\_ 20150224  
Time 16.15  
INSTRUM spect  
PROBHD 5 mm CPPBBO BB  
PULPROG zgpg30  
TD 65536  
SOLVENT CDCl3  
NS 128  
DS 2  
SWH 24038.461 Hz  
FIDRES 0.366798 Hz  
AQ 1.3631488 sec  
RG 43.71  
DW 20.800 usec  
DE 82.37 usec  
TE 298.2 K  
D1 2.0000000 sec  
D11 0.0300000 sec  
TD0 7

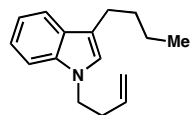

9e

===== CHANNEL f1 =====  
SFO1 100.6228298 MHz  
NUC1 13C  
P1 10.00 usec  
PLW1 36.0000000 W

===== CHANNEL f2 =====  
SFO2 400.1316005 MHz  
NUC2 1H  
CPDPRG[2] waltz16  
PCPD2 90.00 usec  
PLW2 7.0000000 W  
PLW12 0.1203300 W  
PLW13 0.0974680 W

F2 - Processing parameters  
SI 32768  
SF 100.6127685 MHz  
WDW EM  
SSB 0  
LB 1.00 Hz  
GB 0  
PC 1.40

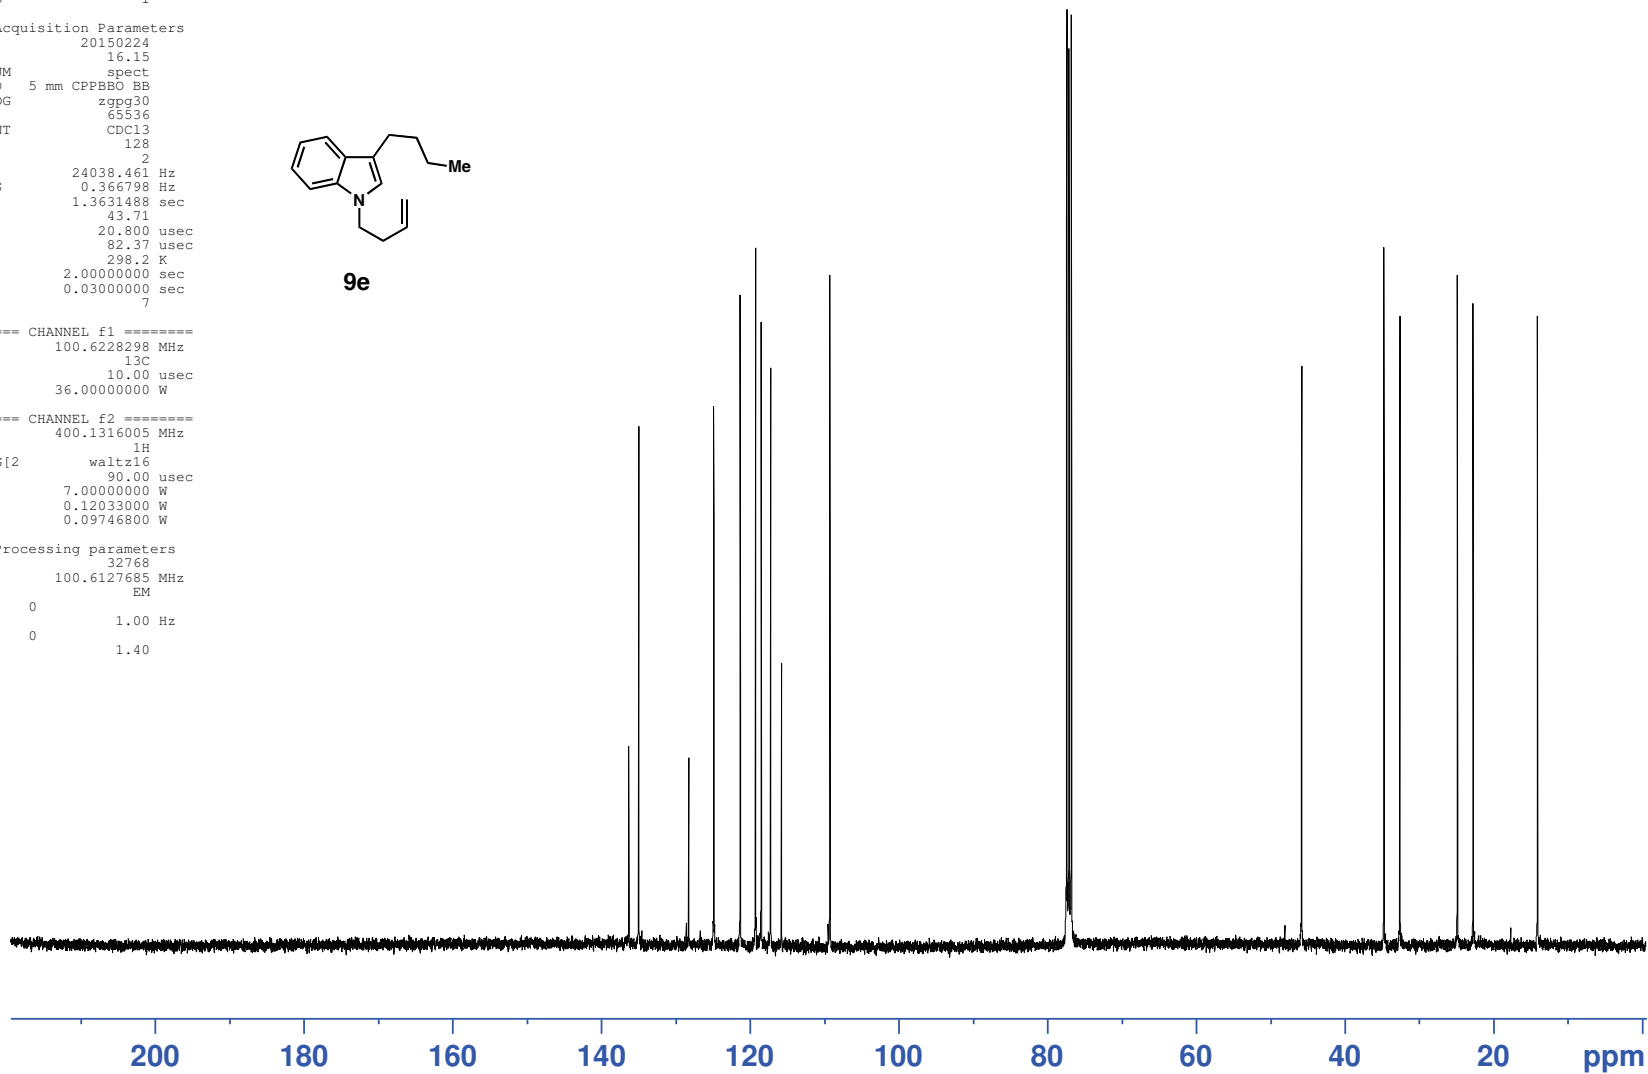



Current Data Parameters  
NAME BED1-278char  
EXPNO 1  
PROCNO 1

F2 - Acquisition Parameters  
Date\_ 20150506  
Time 19.13  
INSTRUM spect  
PROBHD 5 mm CPPBBO BB  
PULPROG zg30  
TD 65536  
SOLVENT CDCl3  
NS 16  
DS 2  
SWH 8012.820 Hz  
FIDRES 0.122266 Hz  
AQ 4.0894465 sec  
RG 197.44  
DW 62.400 usec  
DE 10.00 usec  
TE 298.1 K  
D1 1.00000000 sec  
TD0 1

==== CHANNEL f1 =====  
SFO1 400.1324710 MHz  
NUC1 1H  
P1 11.70 usec  
PLW1 7.00000000 W

F2 - Processing parameters  
SI 65536  
SF 400.1300098 MHz  
WDW EM  
SSB 0  
LB 0.30 Hz  
GB 0  
PC 1.00

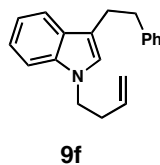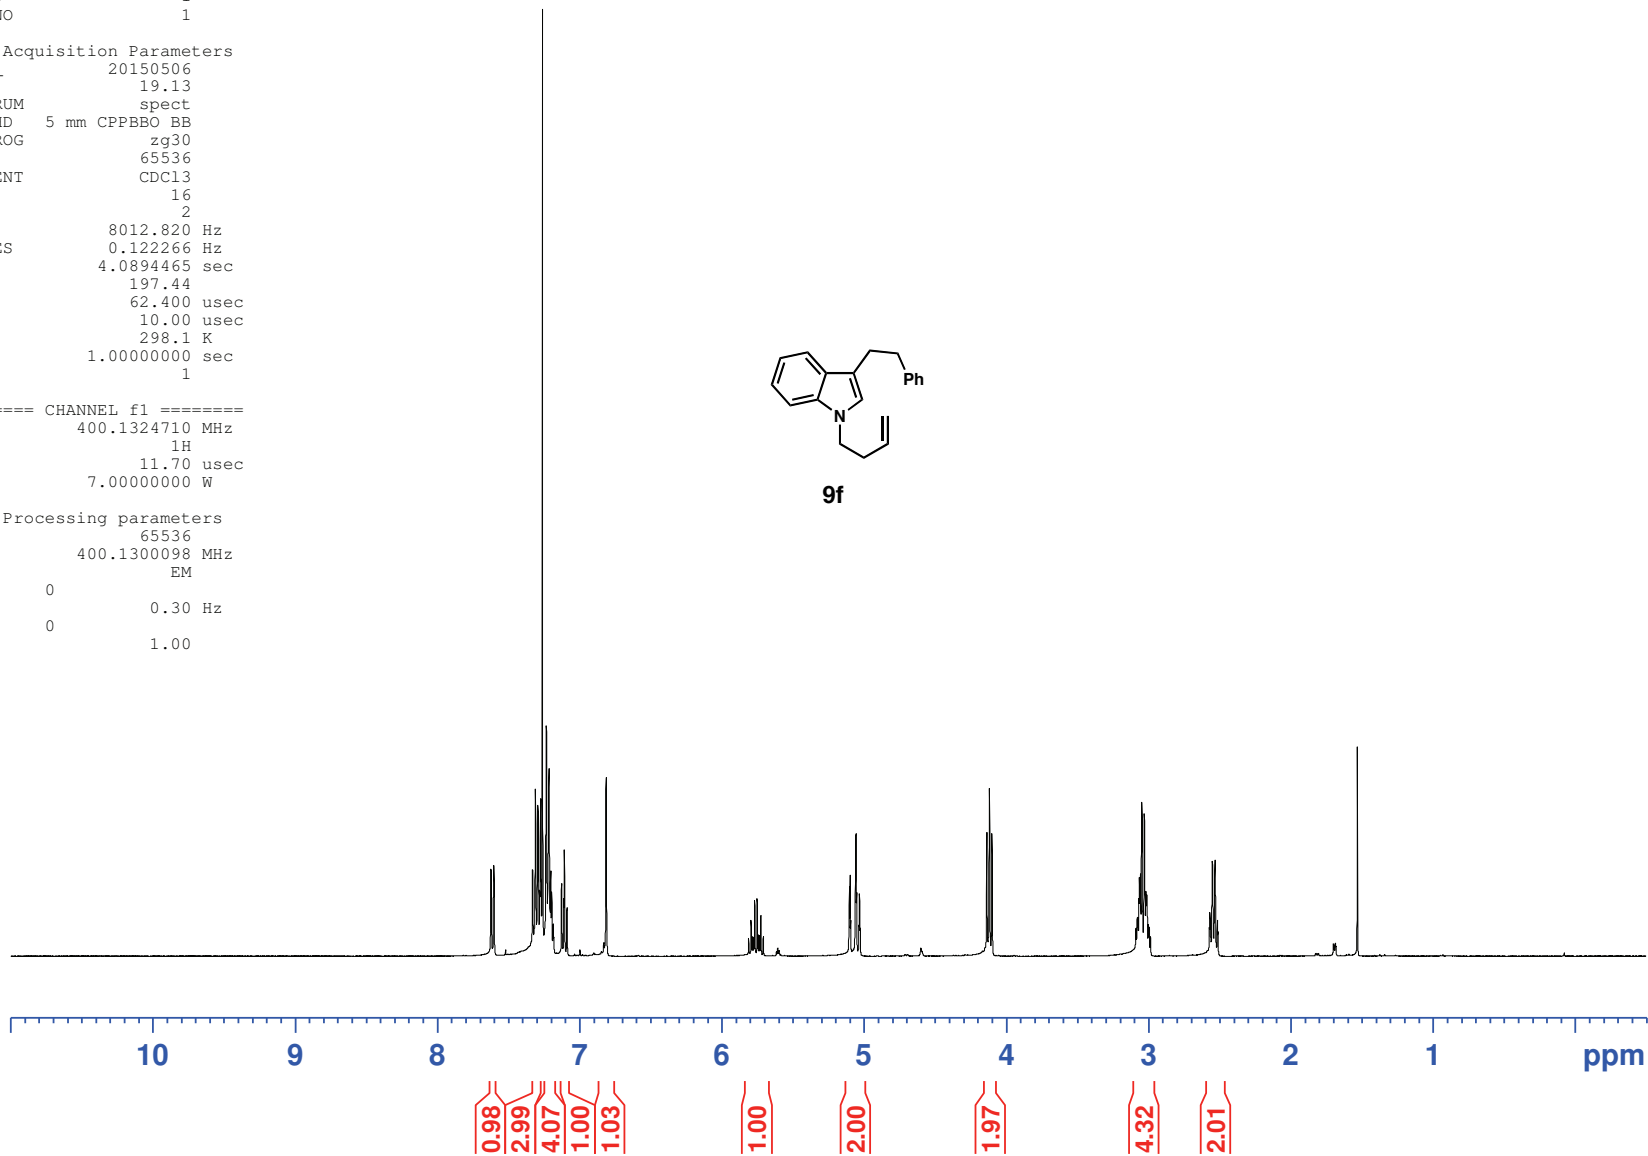

Current Data Parameters  
NAME BED1-287char  
EXPNO 2  
PROCNO 1

F2 - Acquisition Parameters  
Date\_ 20150328  
Time 18.42  
INSTRUM spect  
PROBHD 5 mm CPPBBO BB  
PULPROG zgpg30  
TD 65536  
SOLVENT CDCl3  
NS 640  
DS 2  
SWH 24038.461 Hz  
FIDRES 0.366798 Hz  
AQ 1.3631488 sec  
RG 55.48  
DW 20.800 usec  
DE 82.37 usec  
TE 298.1 K  
D1 2.0000000 sec  
D11 0.0300000 sec  
TD0 7

===== CHANNEL f1 =====  
SFO1 100.6228298 MHz  
NUC1 13C  
P1 10.00 usec  
PLW1 36.0000000 W

===== CHANNEL f2 =====  
SFO2 400.1316005 MHz  
NUC2 1H  
CPDPRG[2] waltz16  
PCPD2 90.00 usec  
PLW2 7.0000000 W  
PLW12 0.1203300 W  
PLW13 0.0974680 W

F2 - Processing parameters  
SI 32768  
SF 100.6127685 MHz  
WDW no  
SSB 0  
LB 0 Hz  
GB 0  
PC 1.40

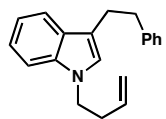

9f

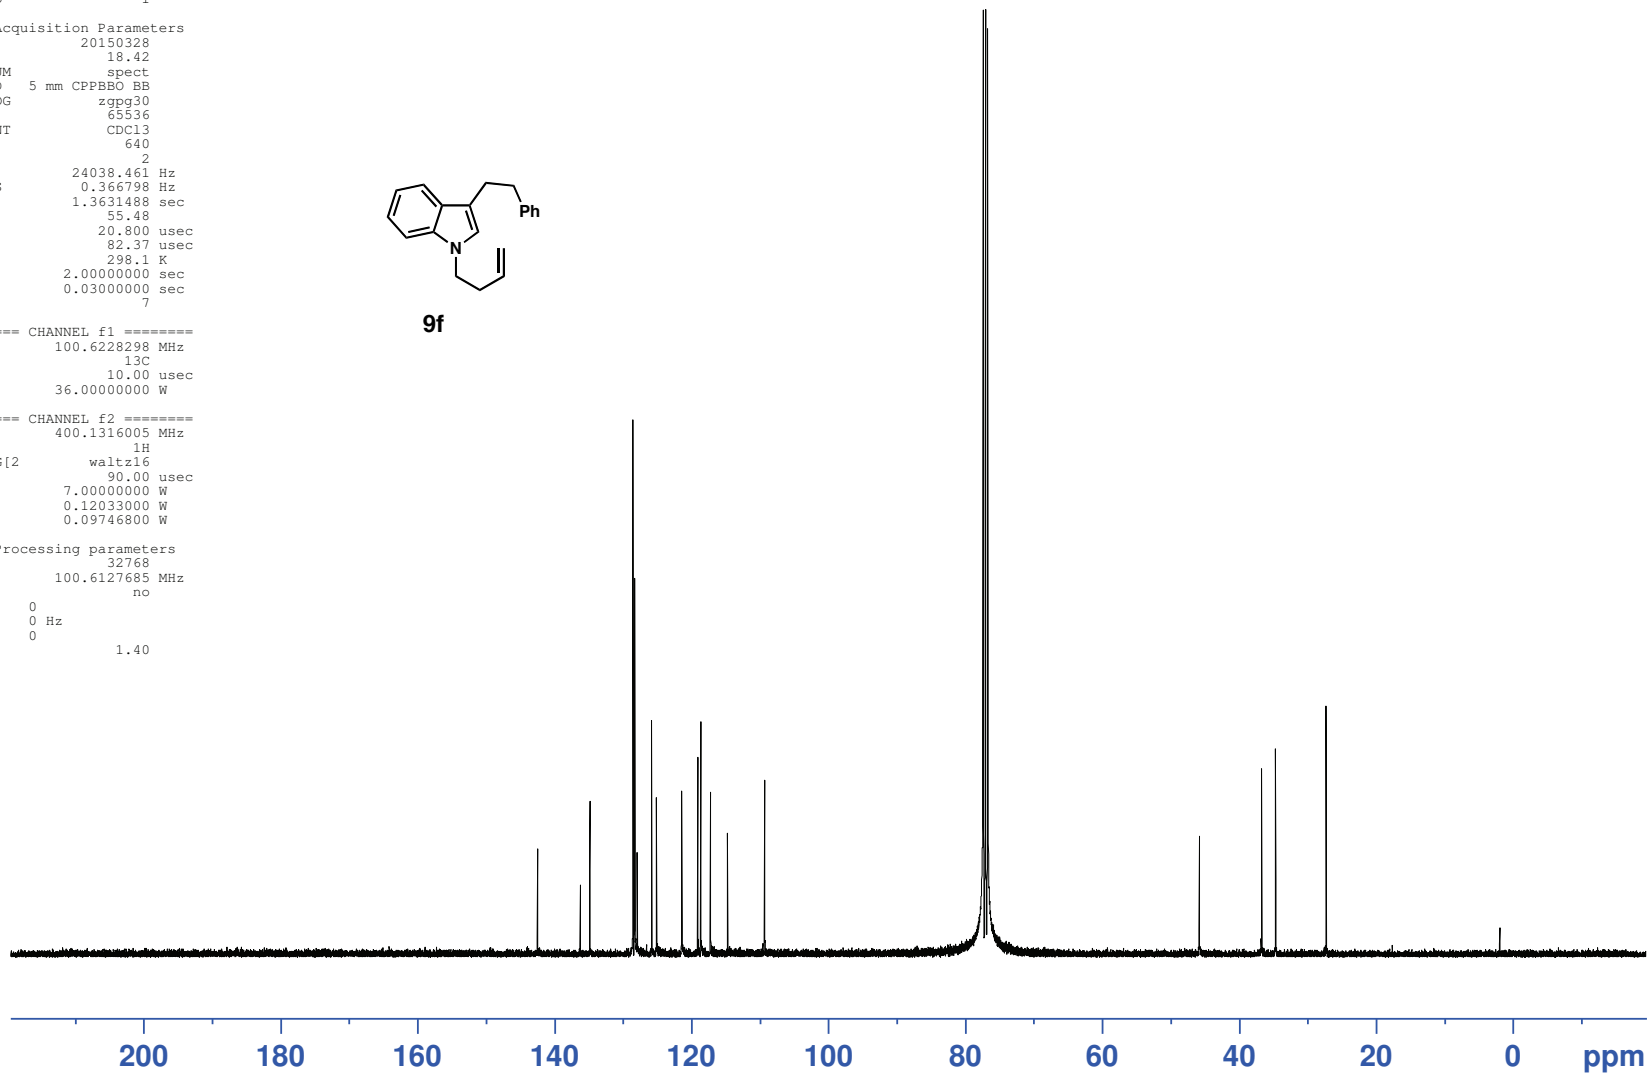

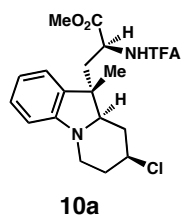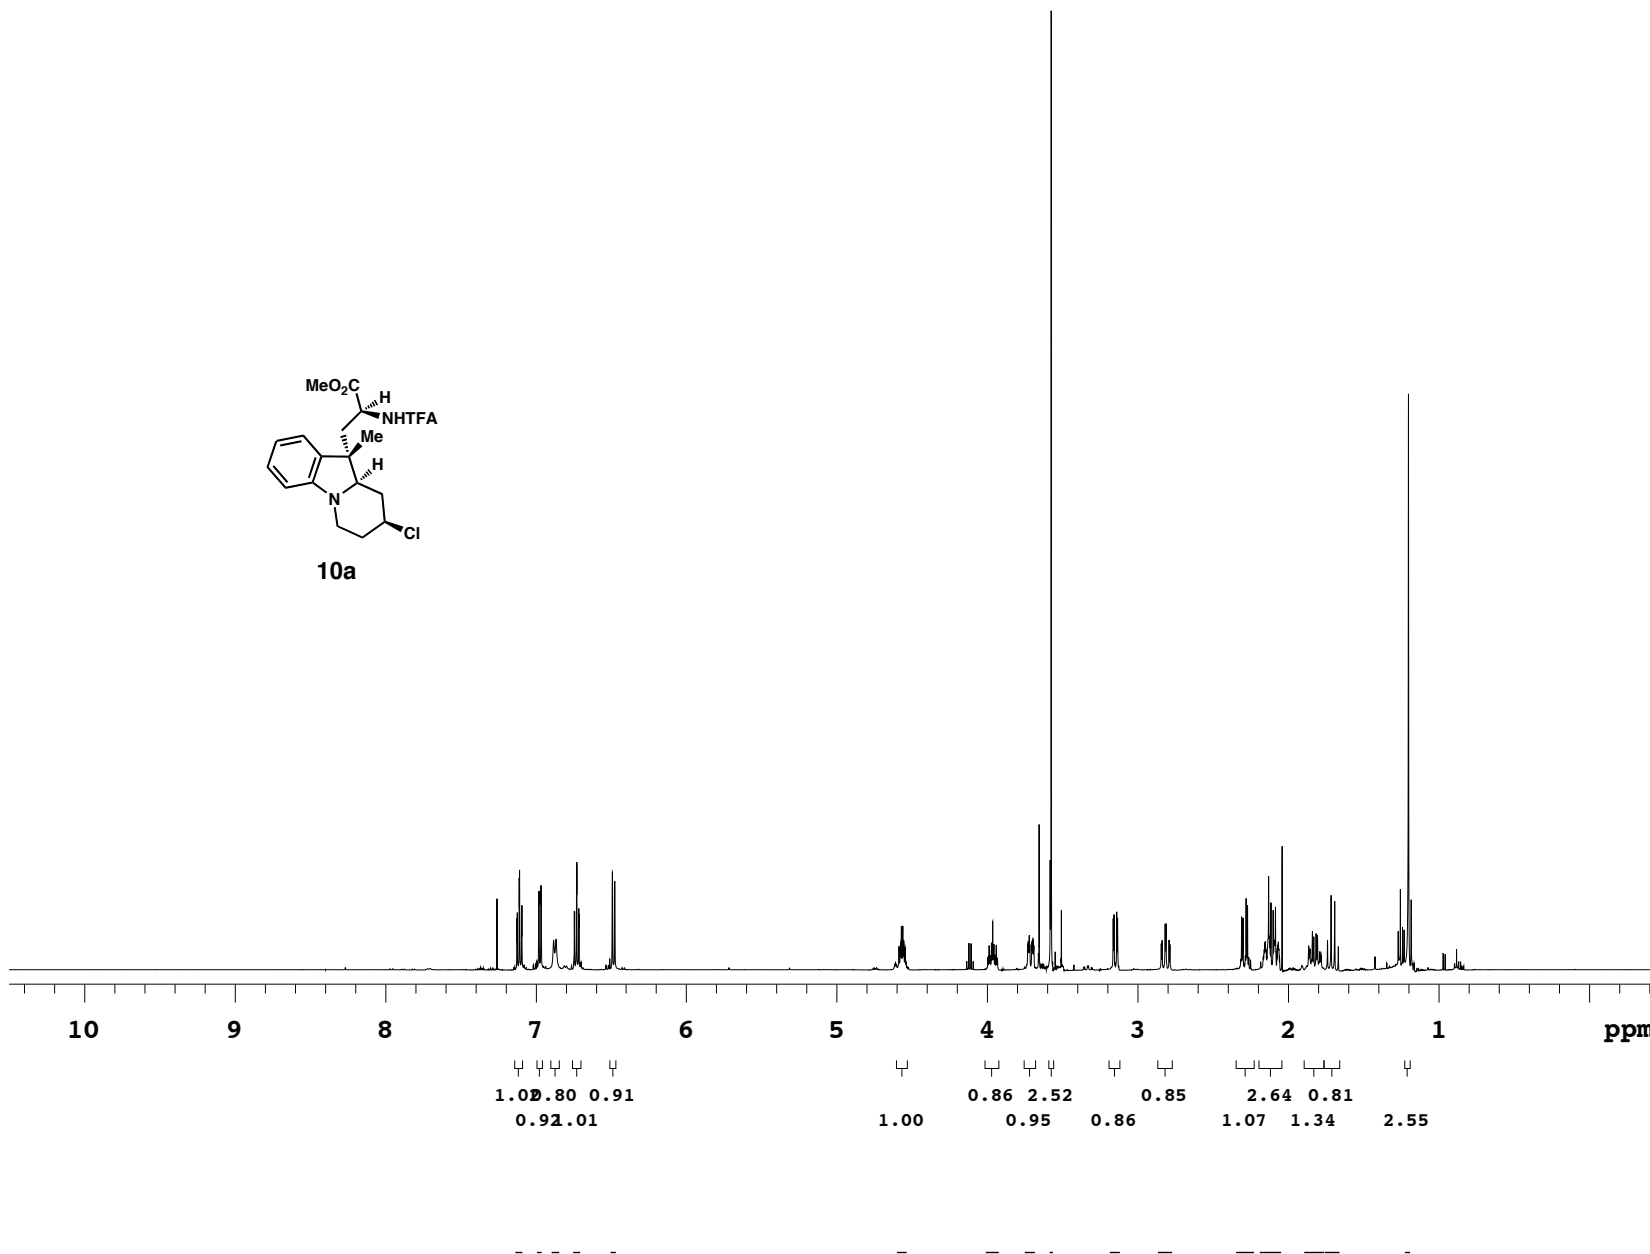

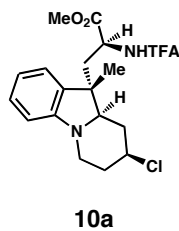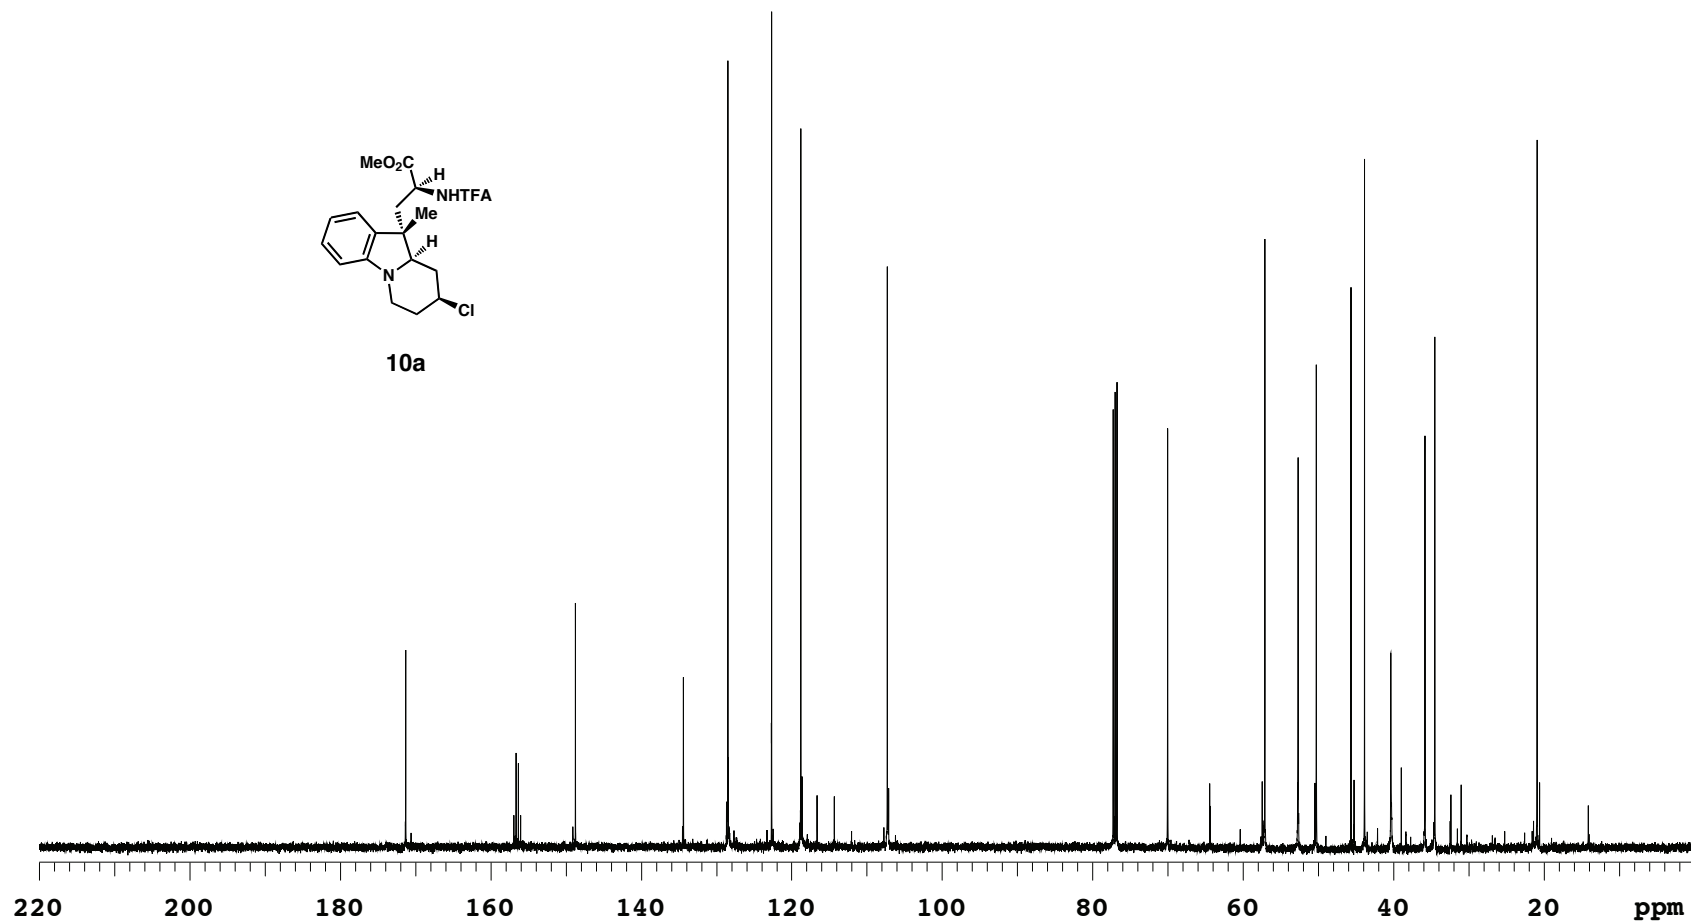

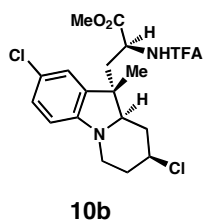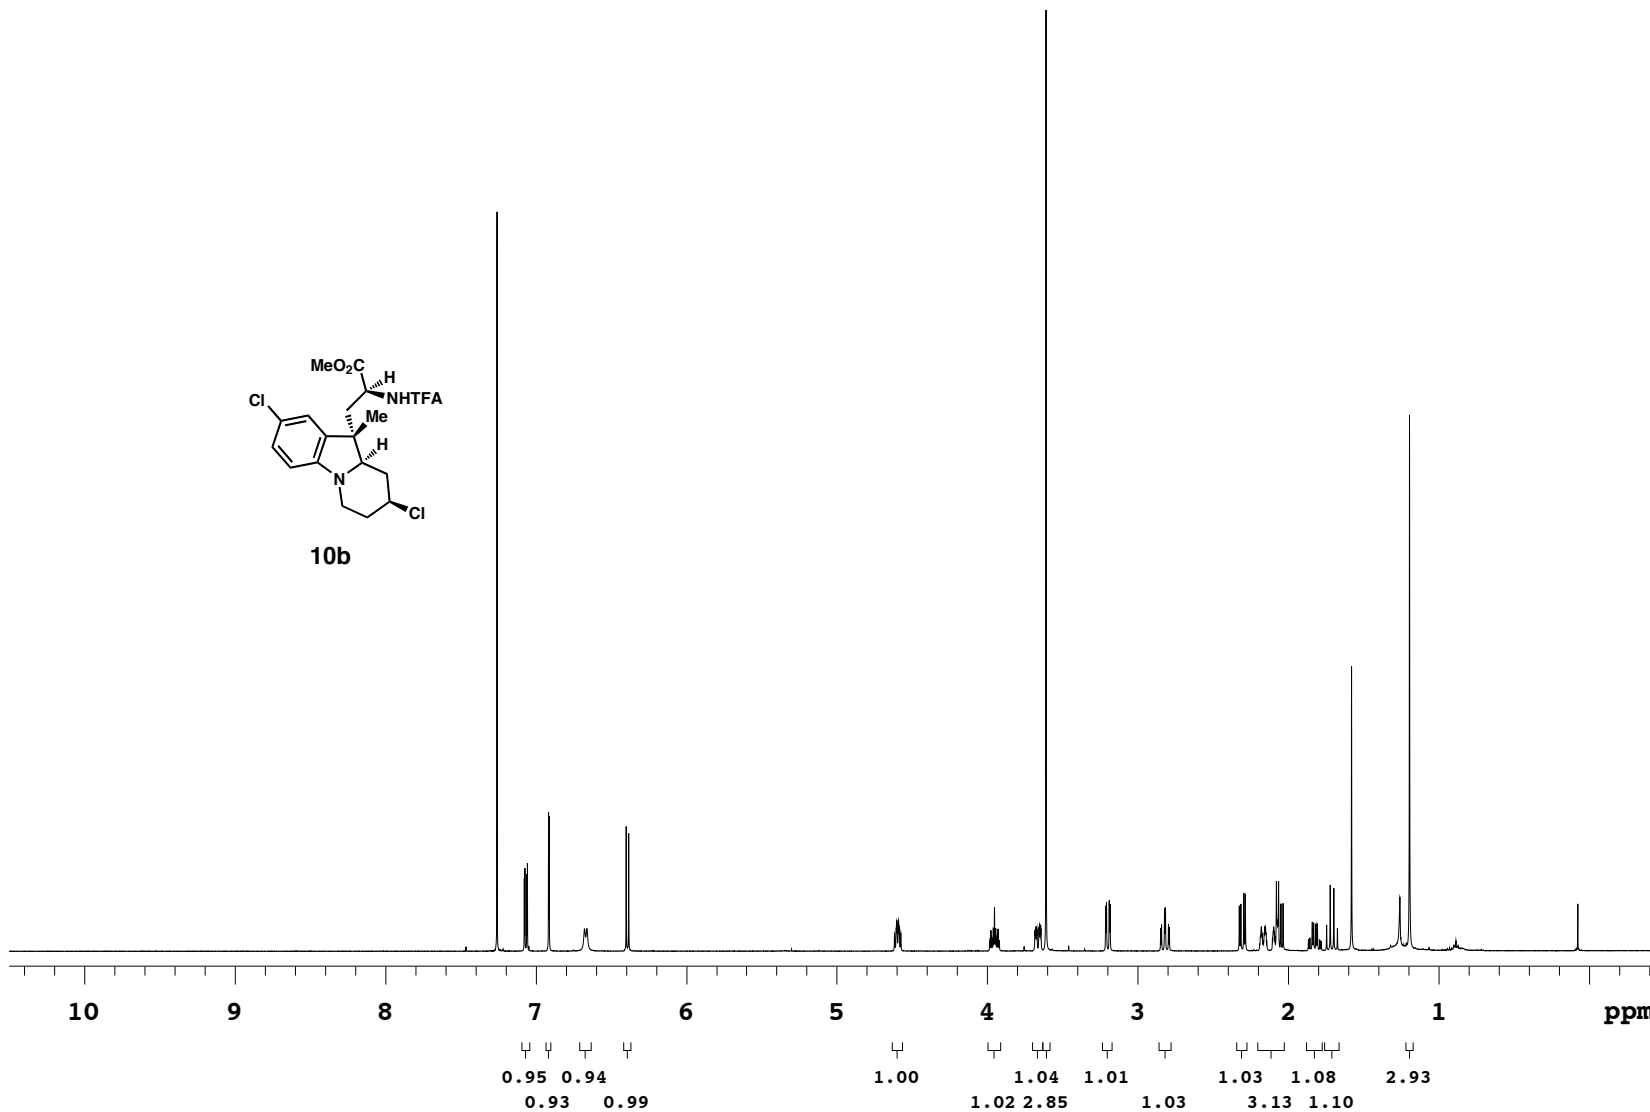

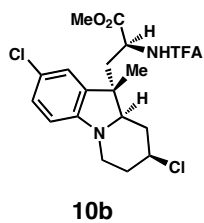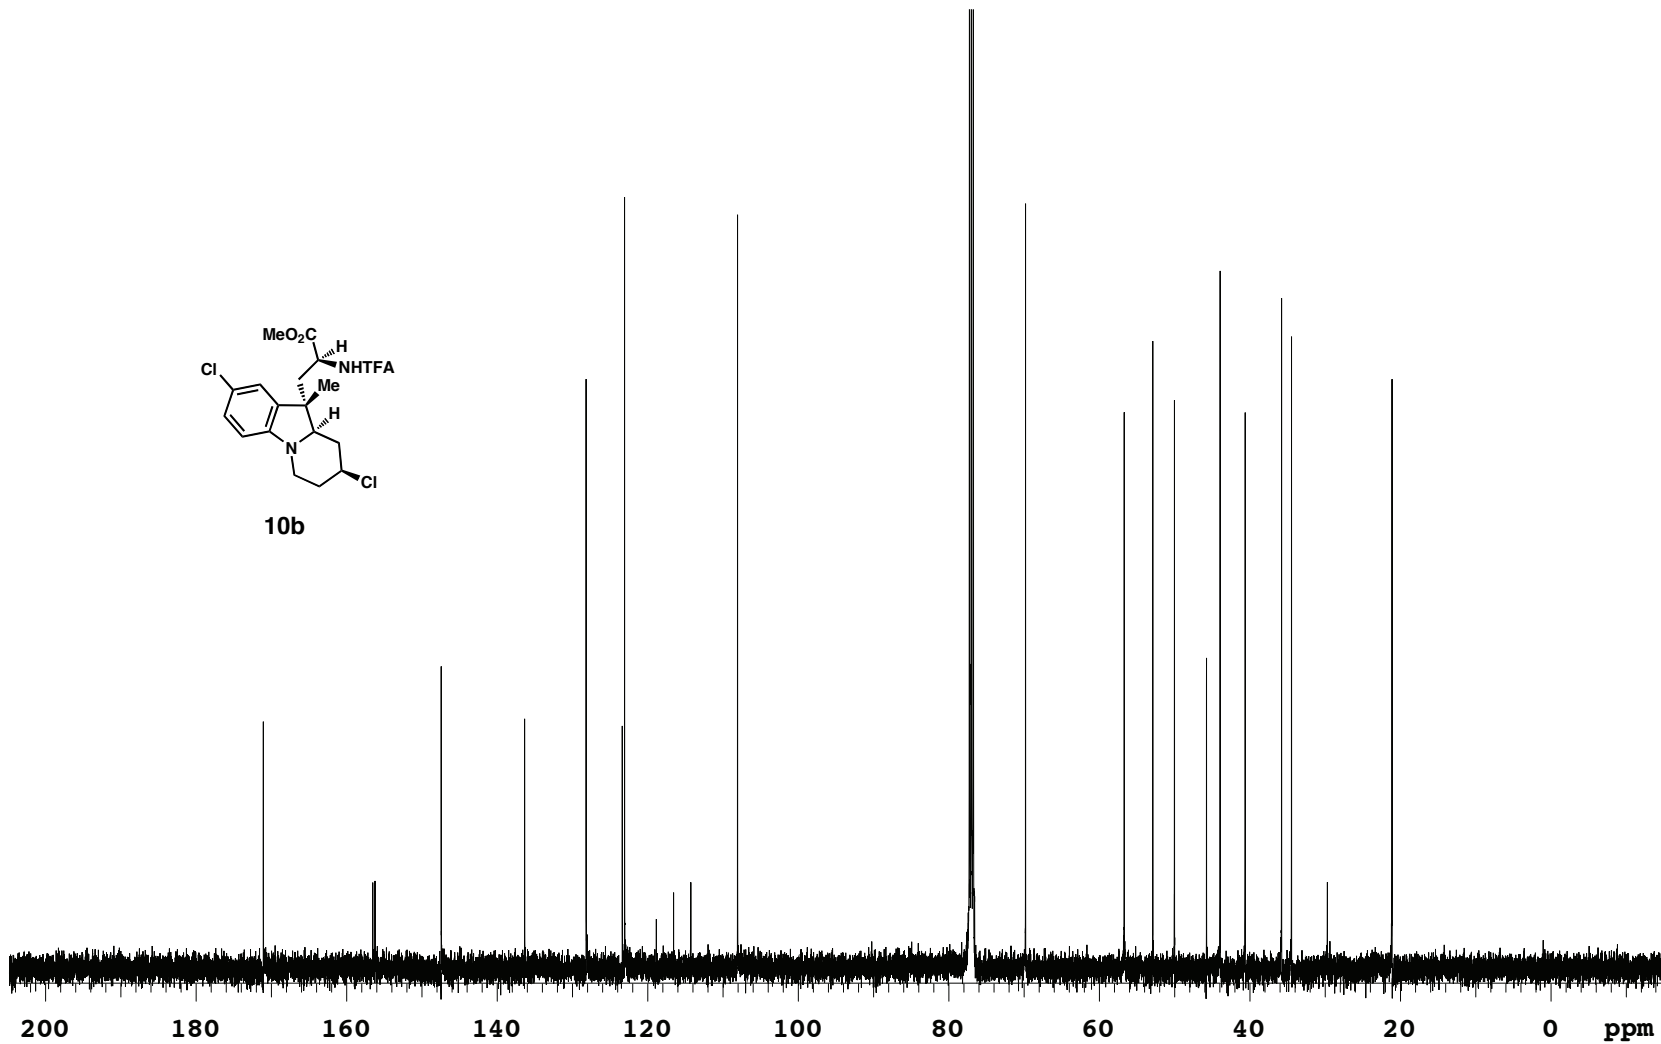

Current Data Parameters  
NAME BED2-71char  
EXPNO 3  
PROCNO 1

F2 - Acquisition Parameters  
Date\_ 20150521  
Time 21.24  
INSTRUM spect  
PROBHD 5 mm CPPBBO BB  
PULPROG zg30  
TD 65536  
SOLVENT CDCl3  
NS 32  
DS 2  
SWH 8012.820 Hz  
FIDRES 0.122266 Hz  
AQ 4.0894465 sec  
RG 156.15  
DW 62.400 usec  
DE 10.00 usec  
TE 294.9 K  
D1 1.0000000 sec  
TD0 1

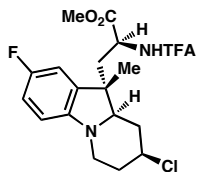

10c

==== CHANNEL f1 =====  
SFO1 400.1324710 MHz  
NUC1 1H  
P1 11.70 usec  
PLW1 7.00000000 W

F2 - Processing parameters  
SI 65536  
SF 400.1300098 MHz  
WDW EM  
SSB 0  
LB 0.30 Hz  
GB 0  
PC 1.00

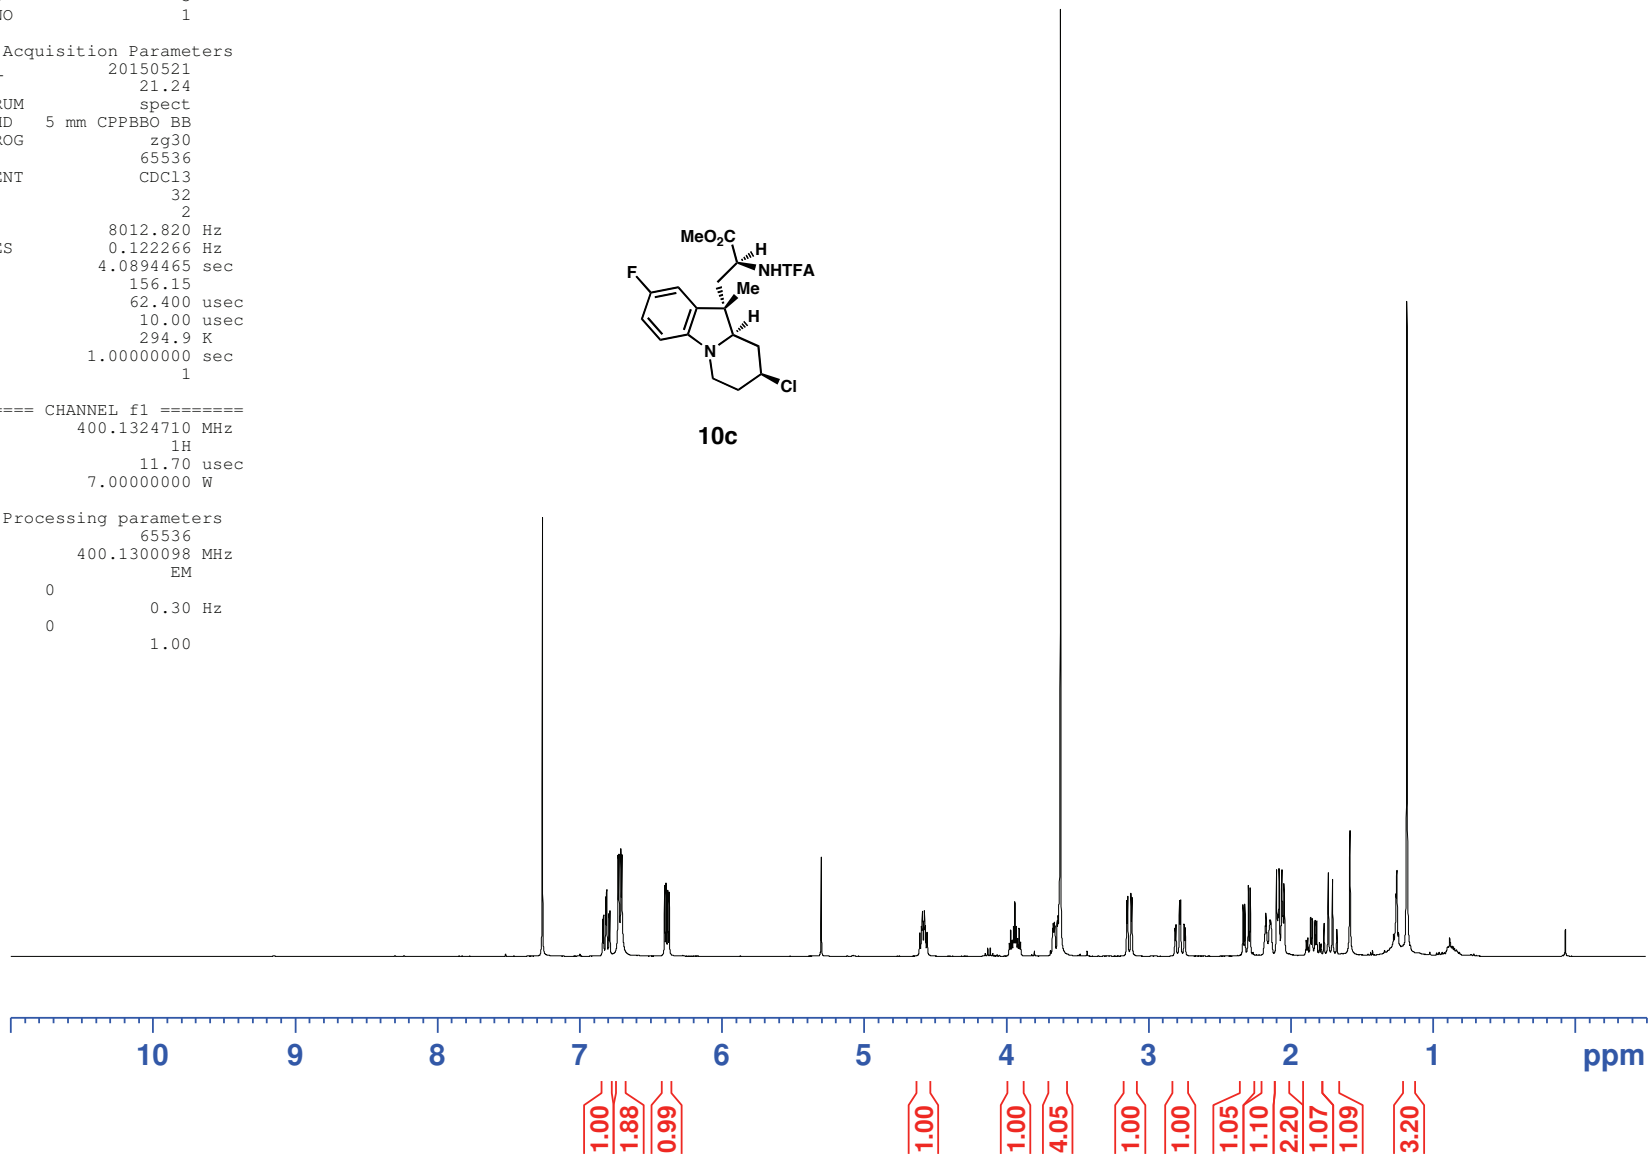

```

Current Data Parameters
NAME      BED2-71char
EXPNO    4
PROCNO   1

F2 - Acquisition Parameters
Date_    20150521
Time     23.51
INSTRUM  spect
PROBHD   5 mm CPPBBO BB
PULPROG  zgpg30
TD       65536
SOLVENT  CDCl3
NS       2560
DS       4
SWH      24038.461 Hz
FIDRES   0.366798 Hz
AQ       1.3631488 sec
RG       72.02
DW       20.800 usec
DE       82.37 usec
TE       294.9 K
D1       2.0000000 sec
D11      0.0300000 sec
TD0      1

===== CHANNEL f1 =====
SFO1    100.6228293 MHz
NUC1     13C
P1      10.00 usec
PLW1    36.0000000 W

===== CHANNEL f2 =====
SFO2    400.1316005 MHz
NUC2     1H
CPDPRG[2] waltz16
PCPD2    90.00 usec
PLW2    7.0000000 W
PLW12   0.1203300 W
PLW13   0.0974680 W

F2 - Processing parameters
SI       32768
SF       100.6127685 MHz
WDW      no
SSB      0
LB       0 Hz
GB       0
PC       1.40

```

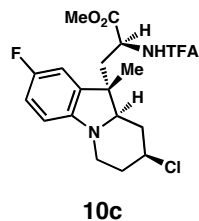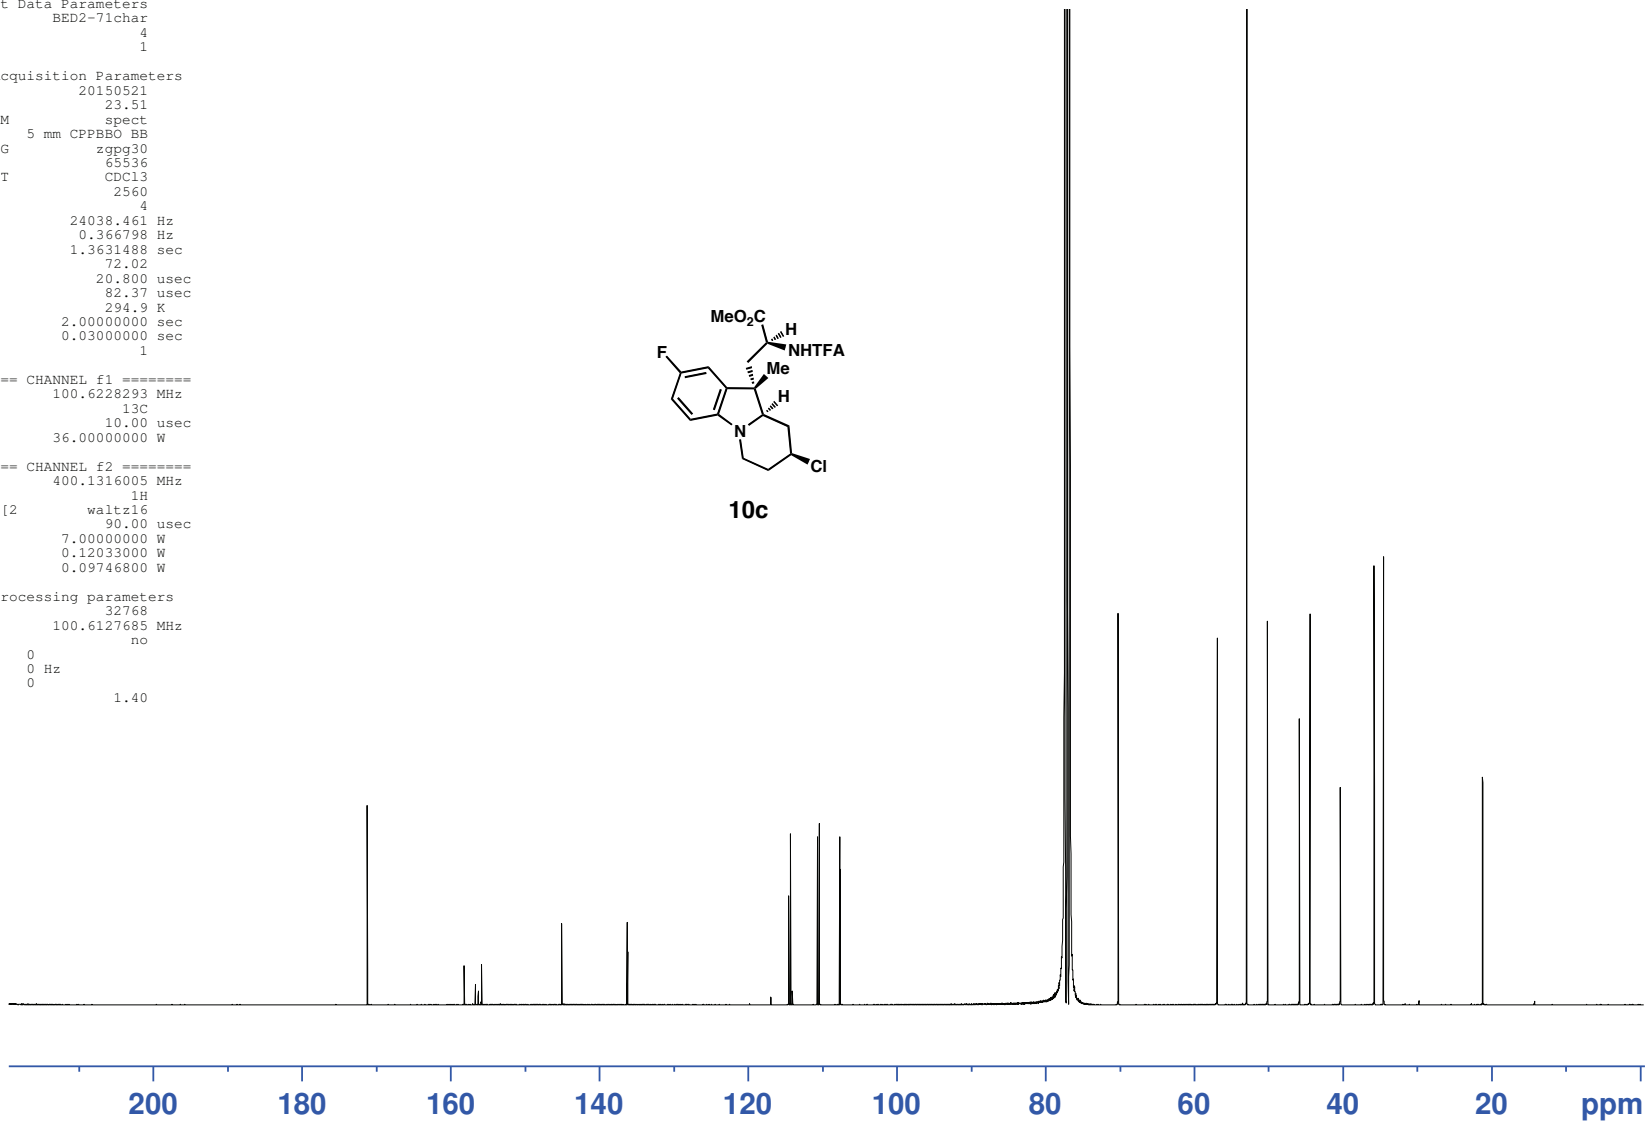



Current Data Parameters  
NAME BED2-37char  
EXPNO 1  
PROCNO 1

F2 - Acquisition Parameters  
Date\_ 20150524  
Time 22.34  
INSTRUM spect  
PROBHD 5 mm CPPBBO BB  
PULPROG zg30  
TD 65536  
SOLVENT CDCl3  
NS 32  
DS 2  
SWH 8012.820 Hz  
FIDRES 0.122266 Hz  
AQ 4.0894465 sec  
RG 156.15  
DW 62.400 usec  
DE 10.00 usec  
TE 294.9 K  
D1 1.00000000 sec  
TD0 1

==== CHANNEL f1 =====  
SF01 400.1324710 MHz  
NUC1 1H  
P1 11.70 usec  
PLW1 7.00000000 W

F2 - Processing parameters  
SI 65536  
SF 400.1300098 MHz  
WDW EM  
SSB 0  
LB 0.30 Hz  
GB 0  
PC 1.00

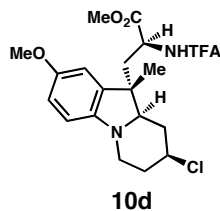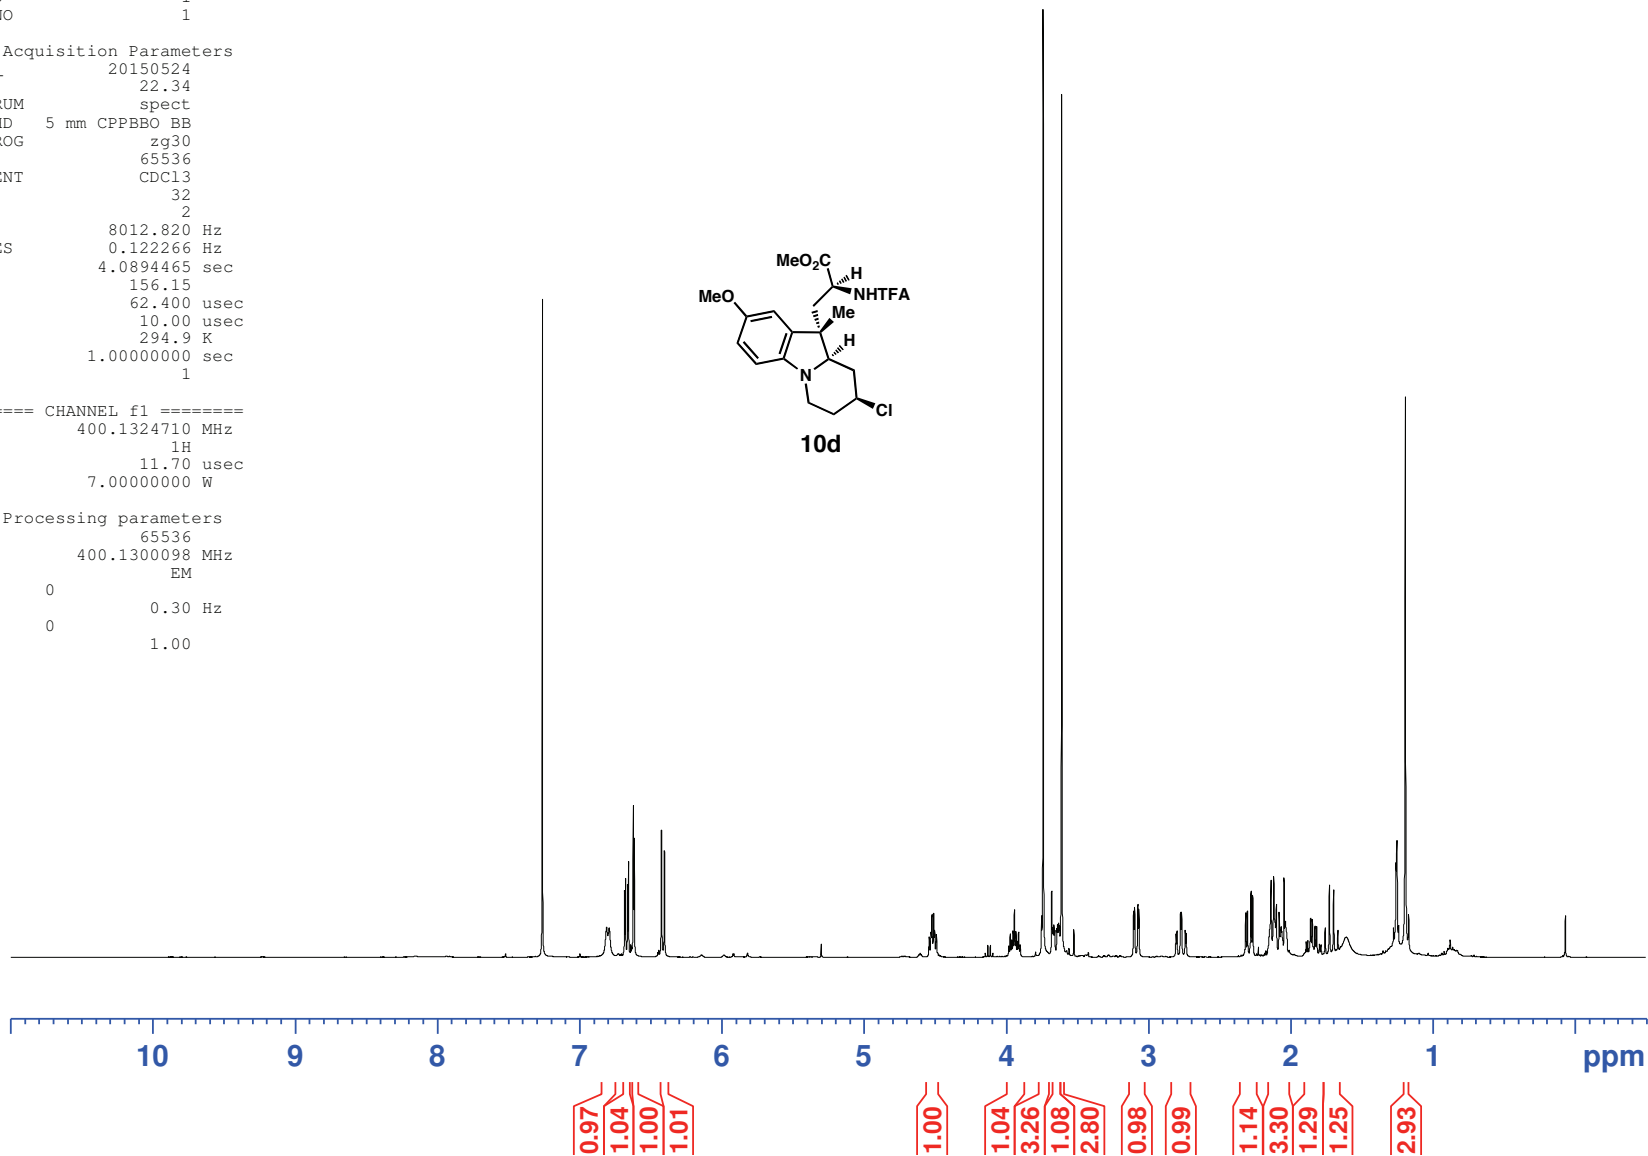

```

Current Data Parameters
NAME      BED2-37char
EXPNO    2
PROCNO   1

F2 - Acquisition Parameters
Date_    20150525
Time     1.01
INSTRUM  spect
PROBHD   5 mm CPPBBO BB
PULPROG  zgpg30
TD       65536
SOLVENT  CDCl3
NS       2560
DS       4
SWH      24038.461 Hz
FIDRES   0.366798 Hz
AQ       1.3631488 sec
RG       50.33
DW       20.800 usec
DE       82.37 usec
TE       294.9 K
D1       2.0000000 sec
D11      0.0300000 sec
TD0      1

===== CHANNEL f1 =====
SFO1    100.6228293 MHz
NUC1     13C
P1      10.00 usec
PLW1    36.0000000 W

===== CHANNEL f2 =====
SFO2    400.1316005 MHz
NUC2     1H
CPDPRG2 waltz16
PCPD2   90.00 usec
PLW2    7.0000000 W
PLW12   0.1203300 W
PLW13   0.0974680 W

F2 - Processing parameters
SI      32768
SF      100.6127721 MHz
WDW     EM
SSB     0
LB      1.00 Hz
GB      0
PC      1.40

```

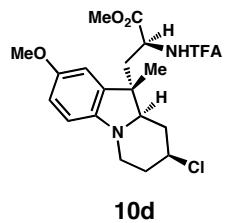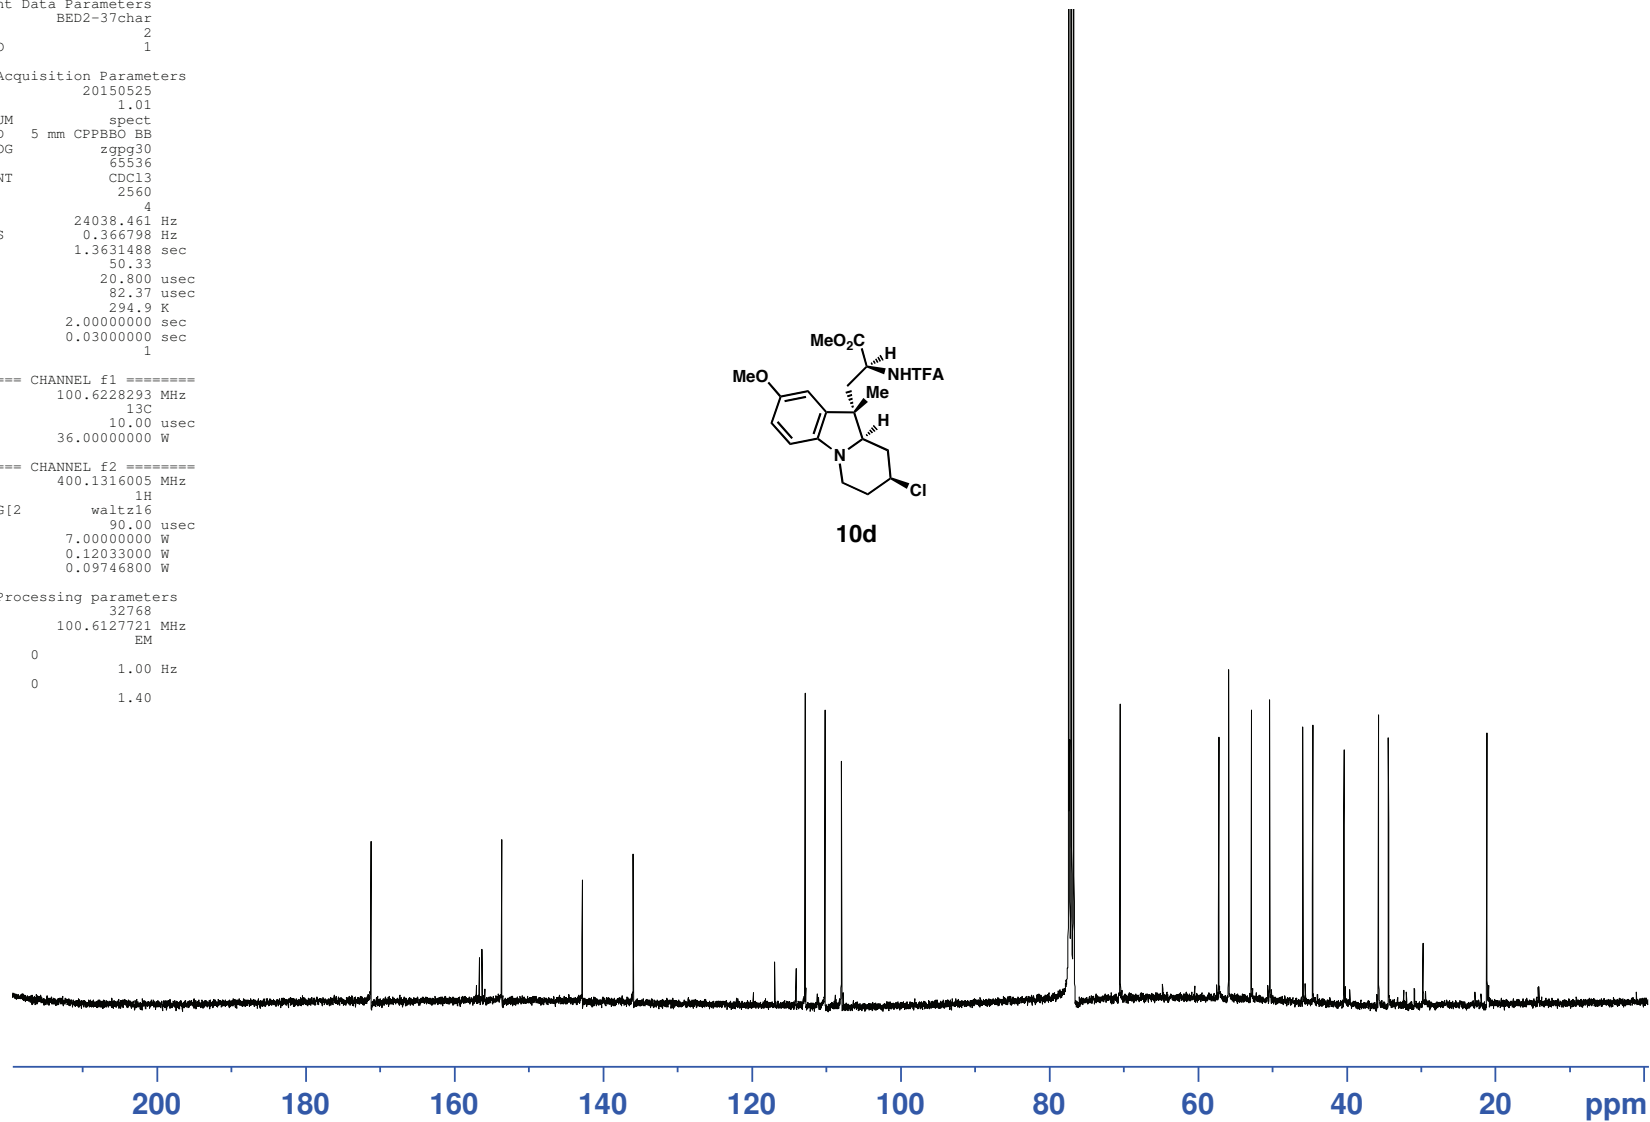

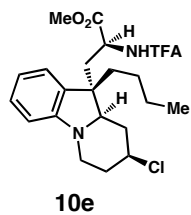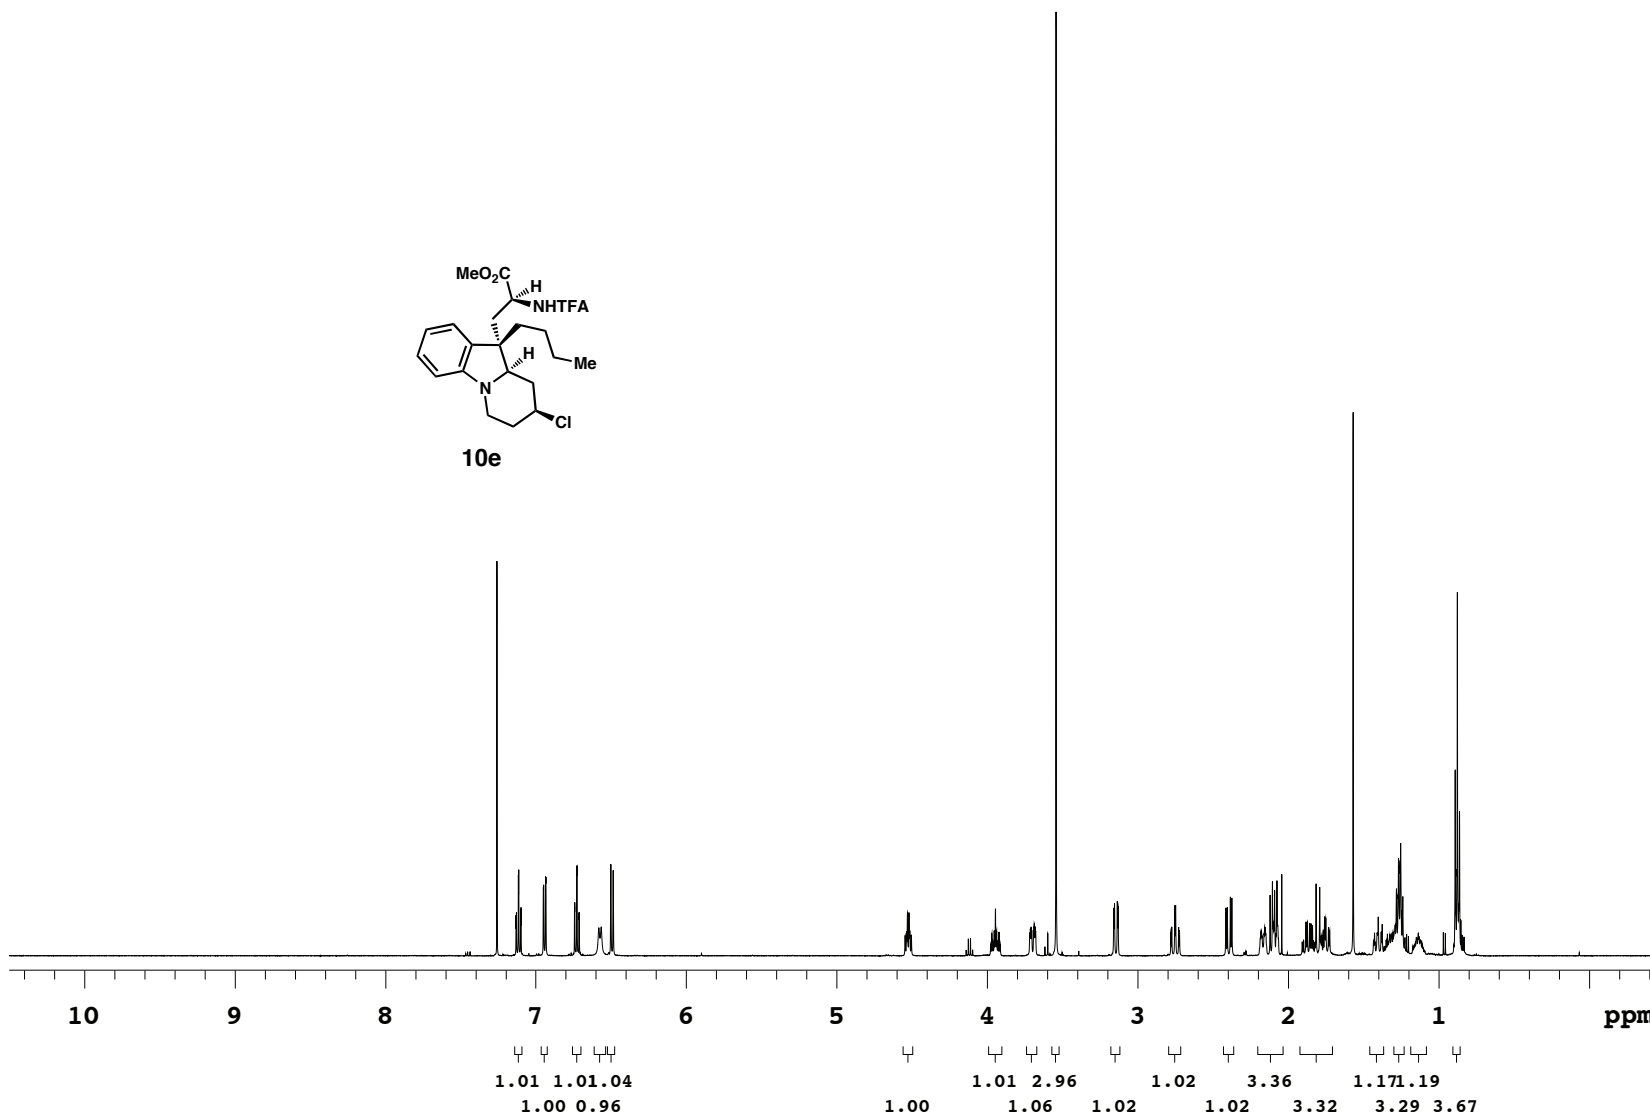

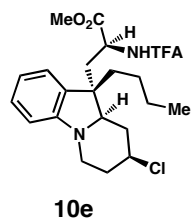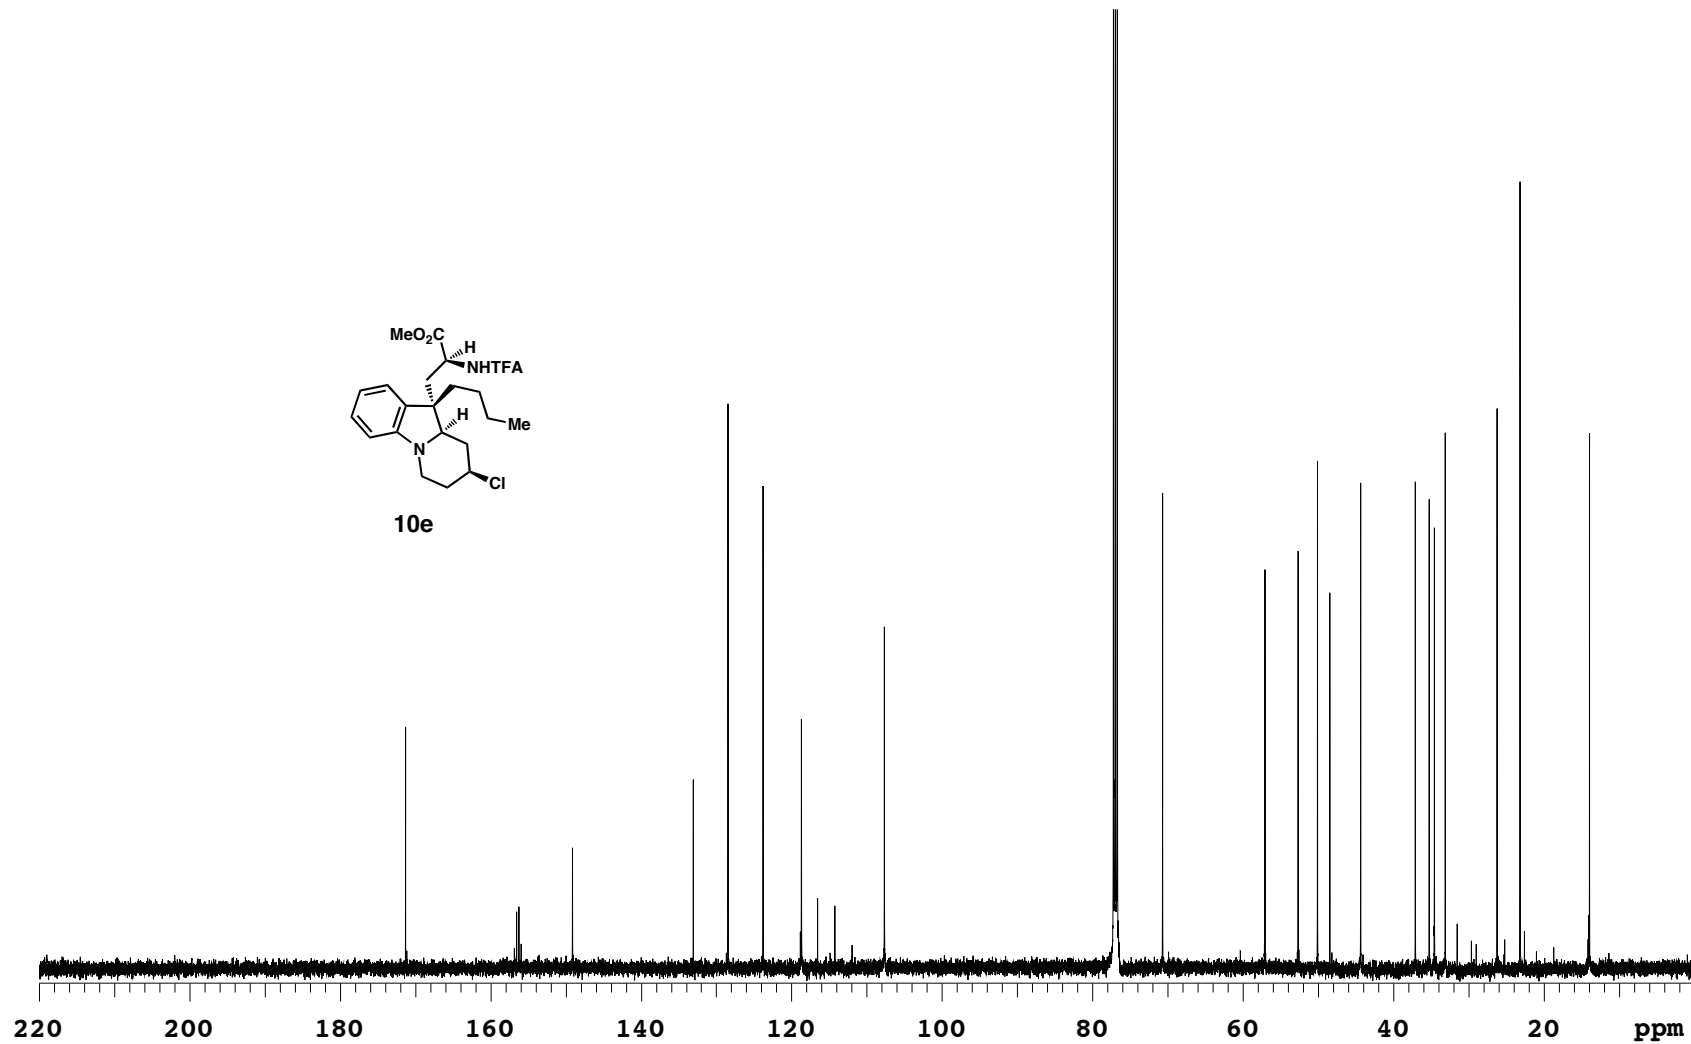

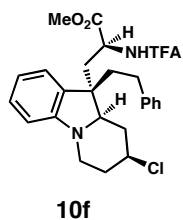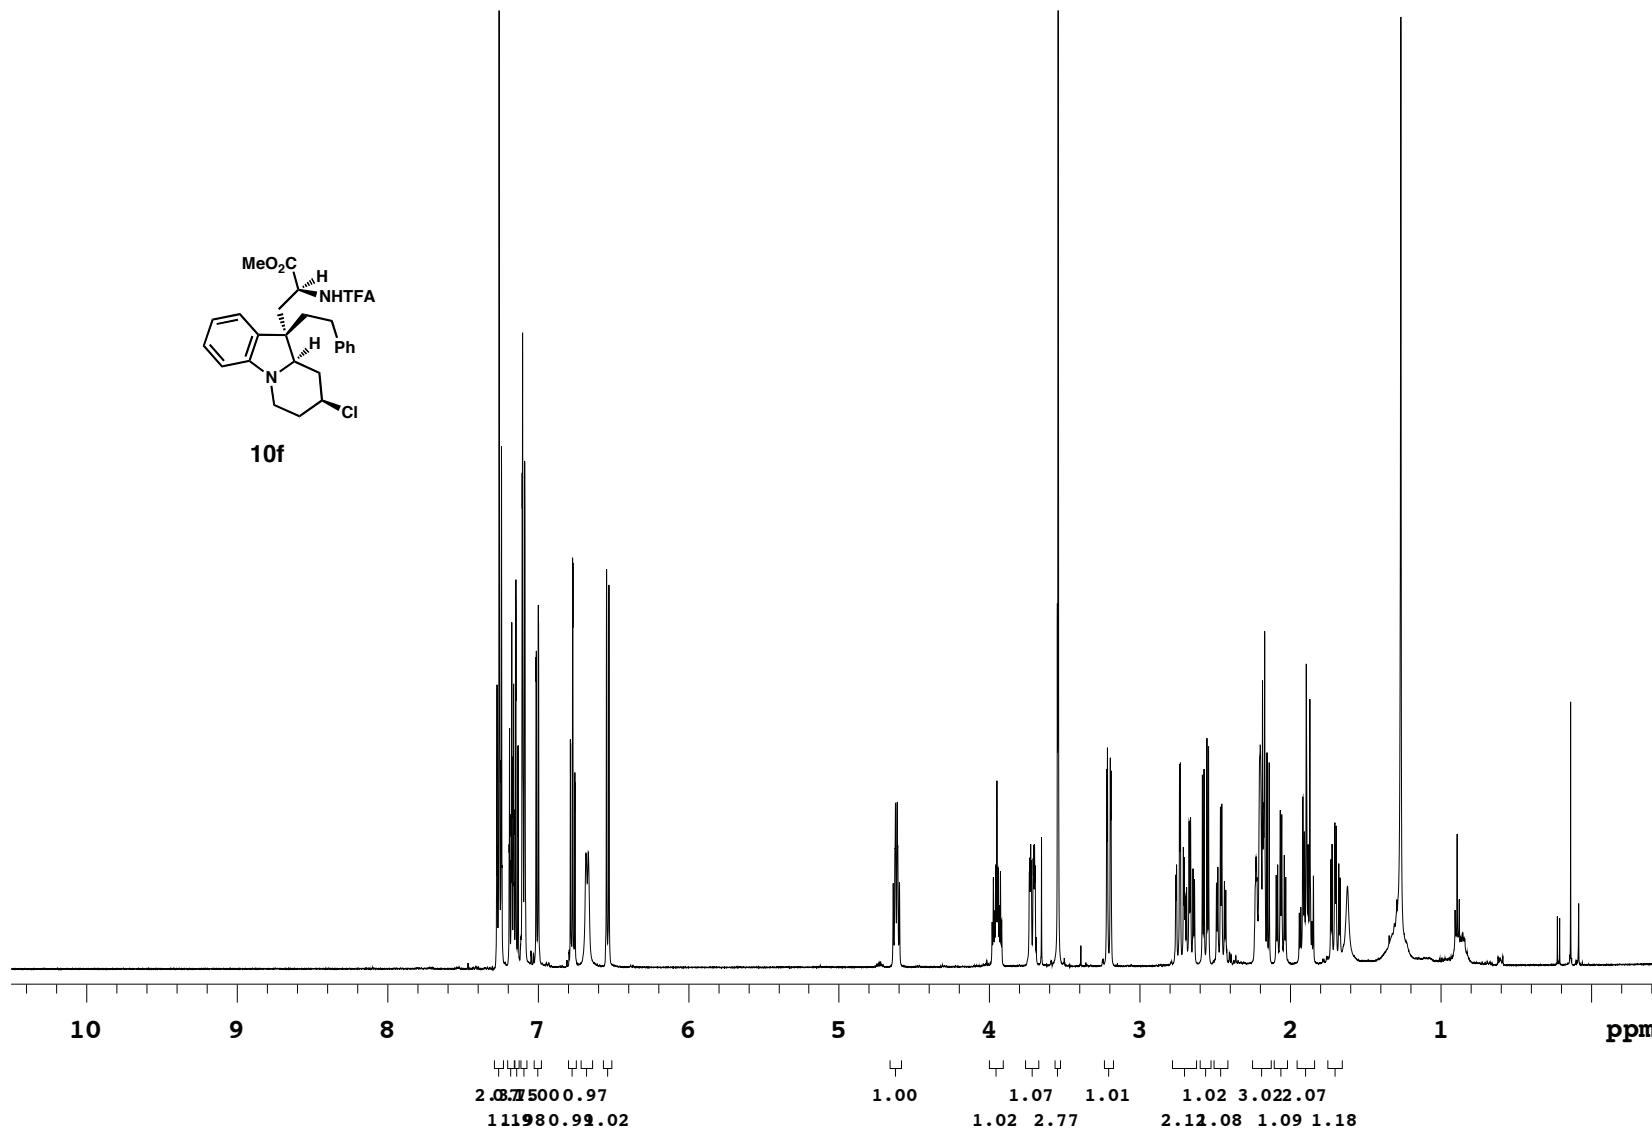

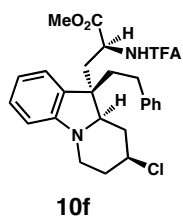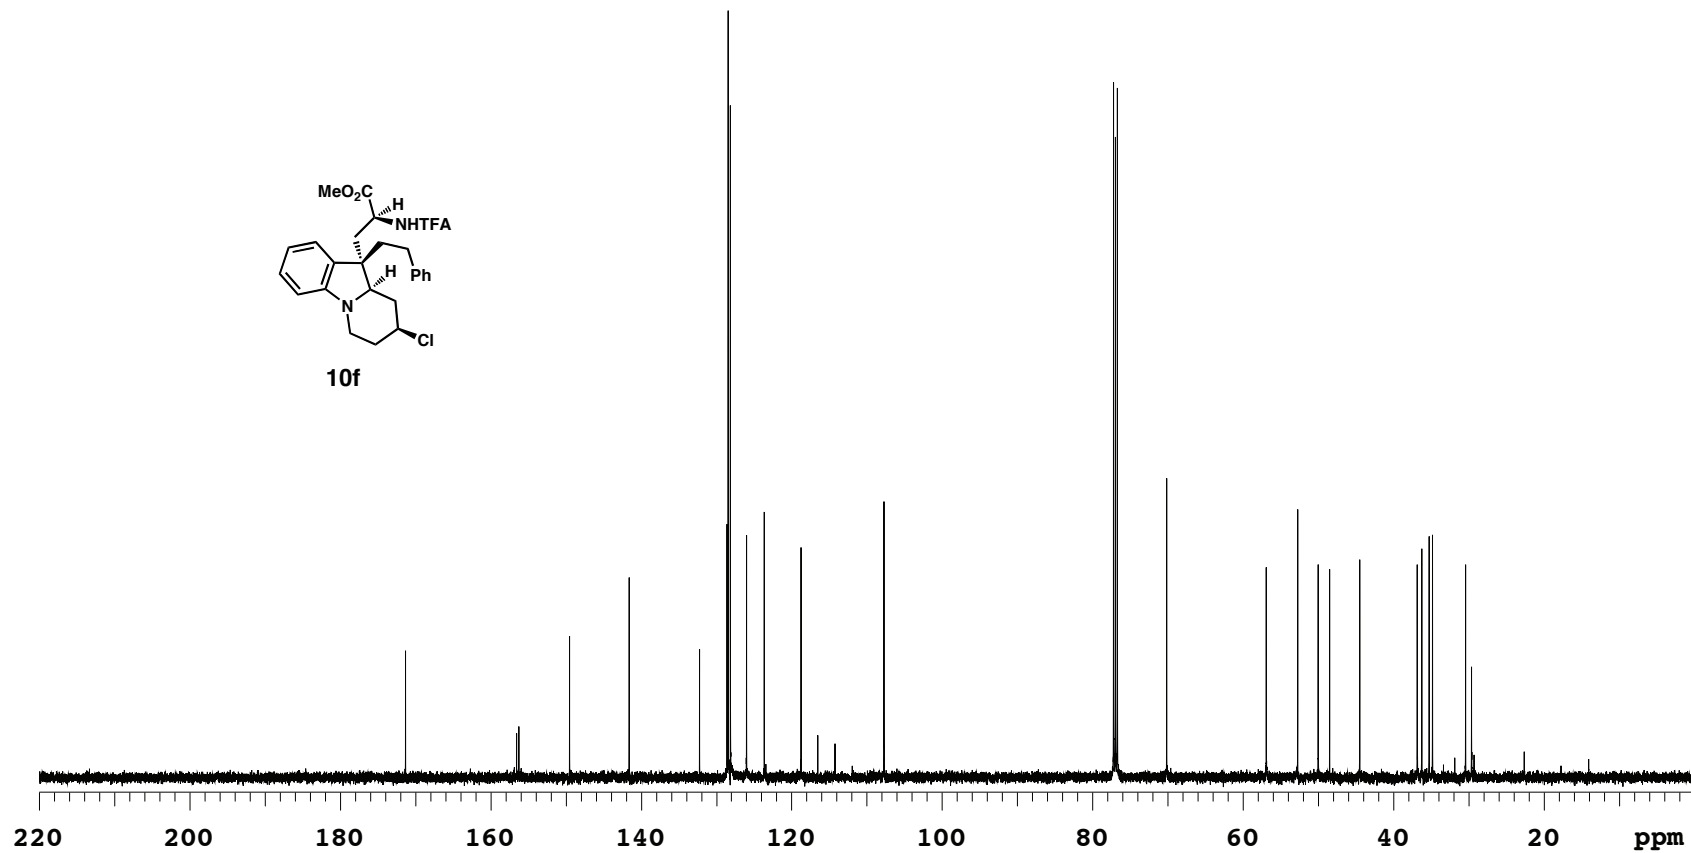

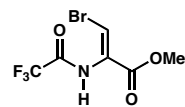

S7

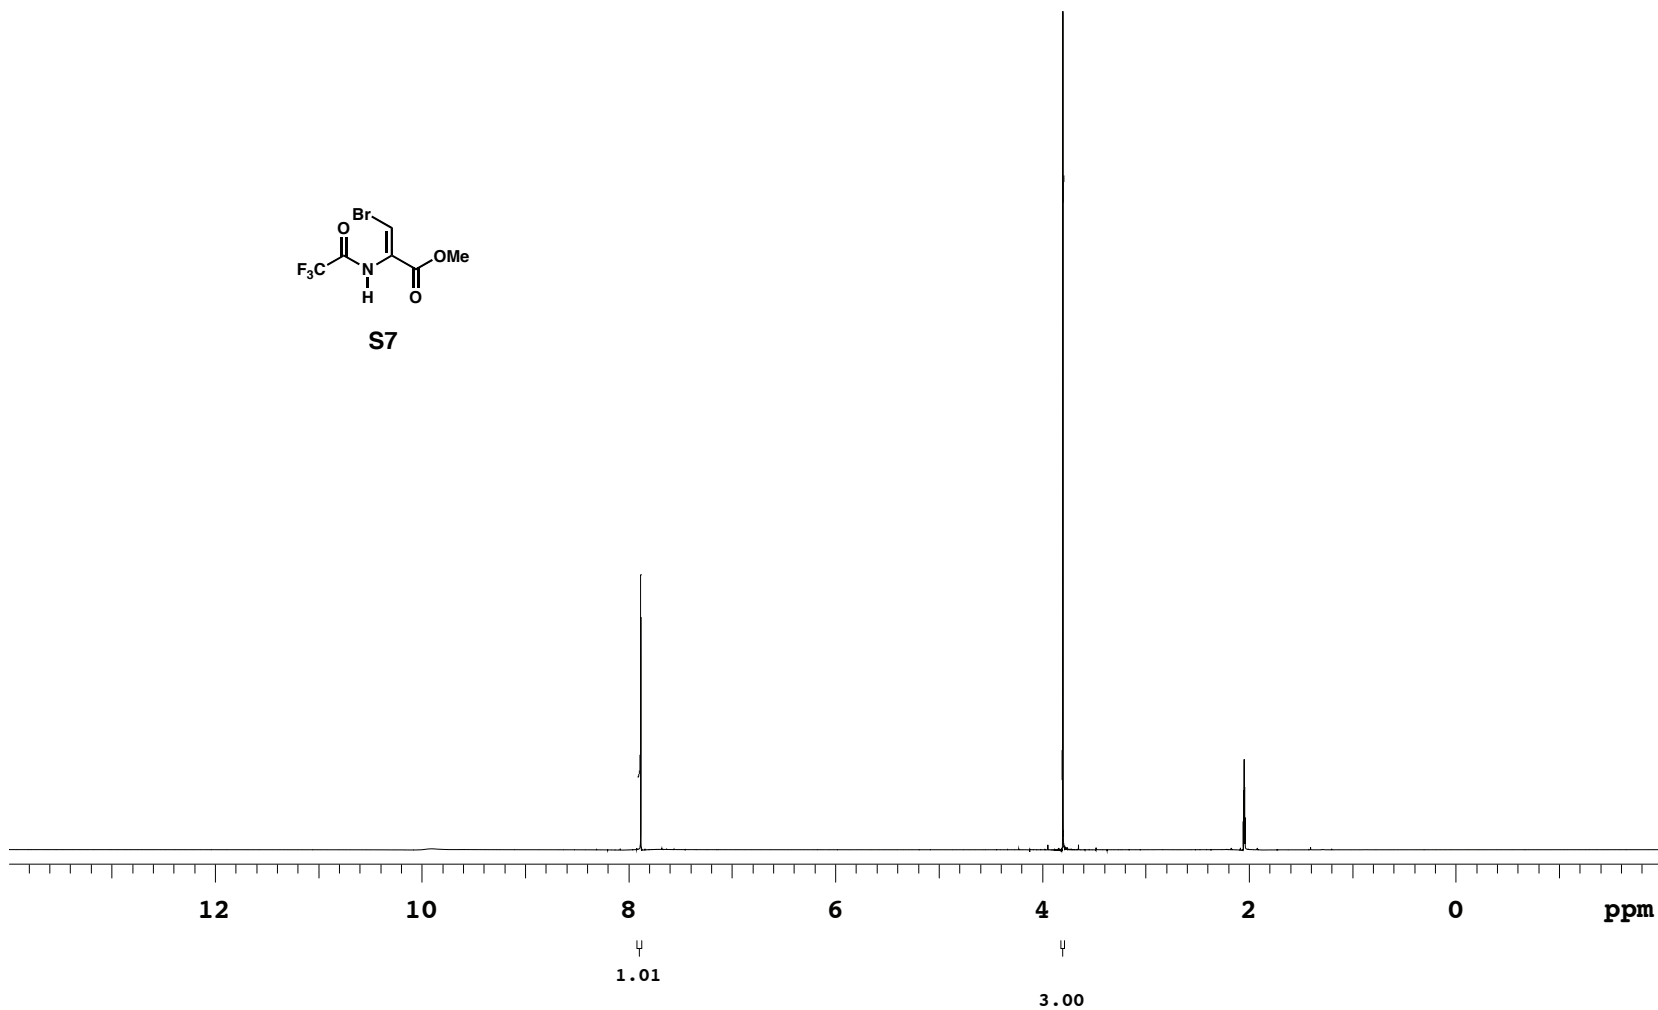

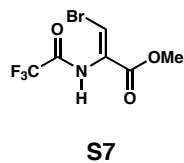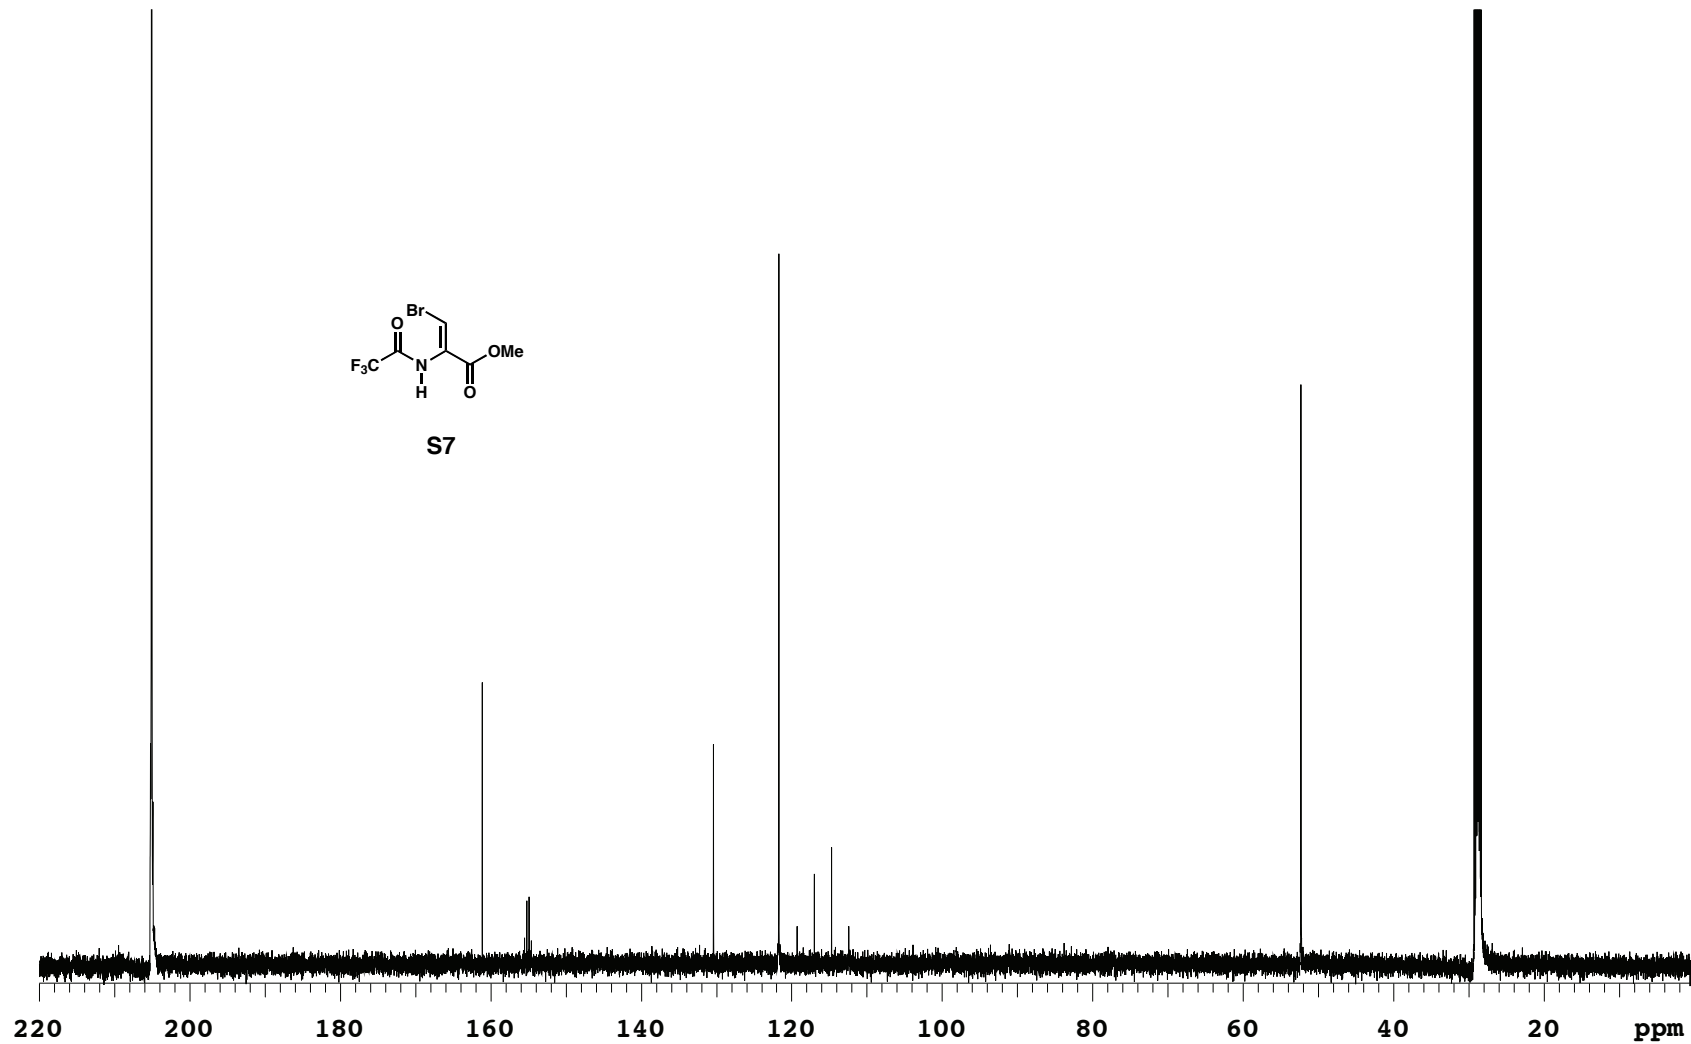



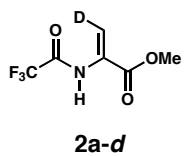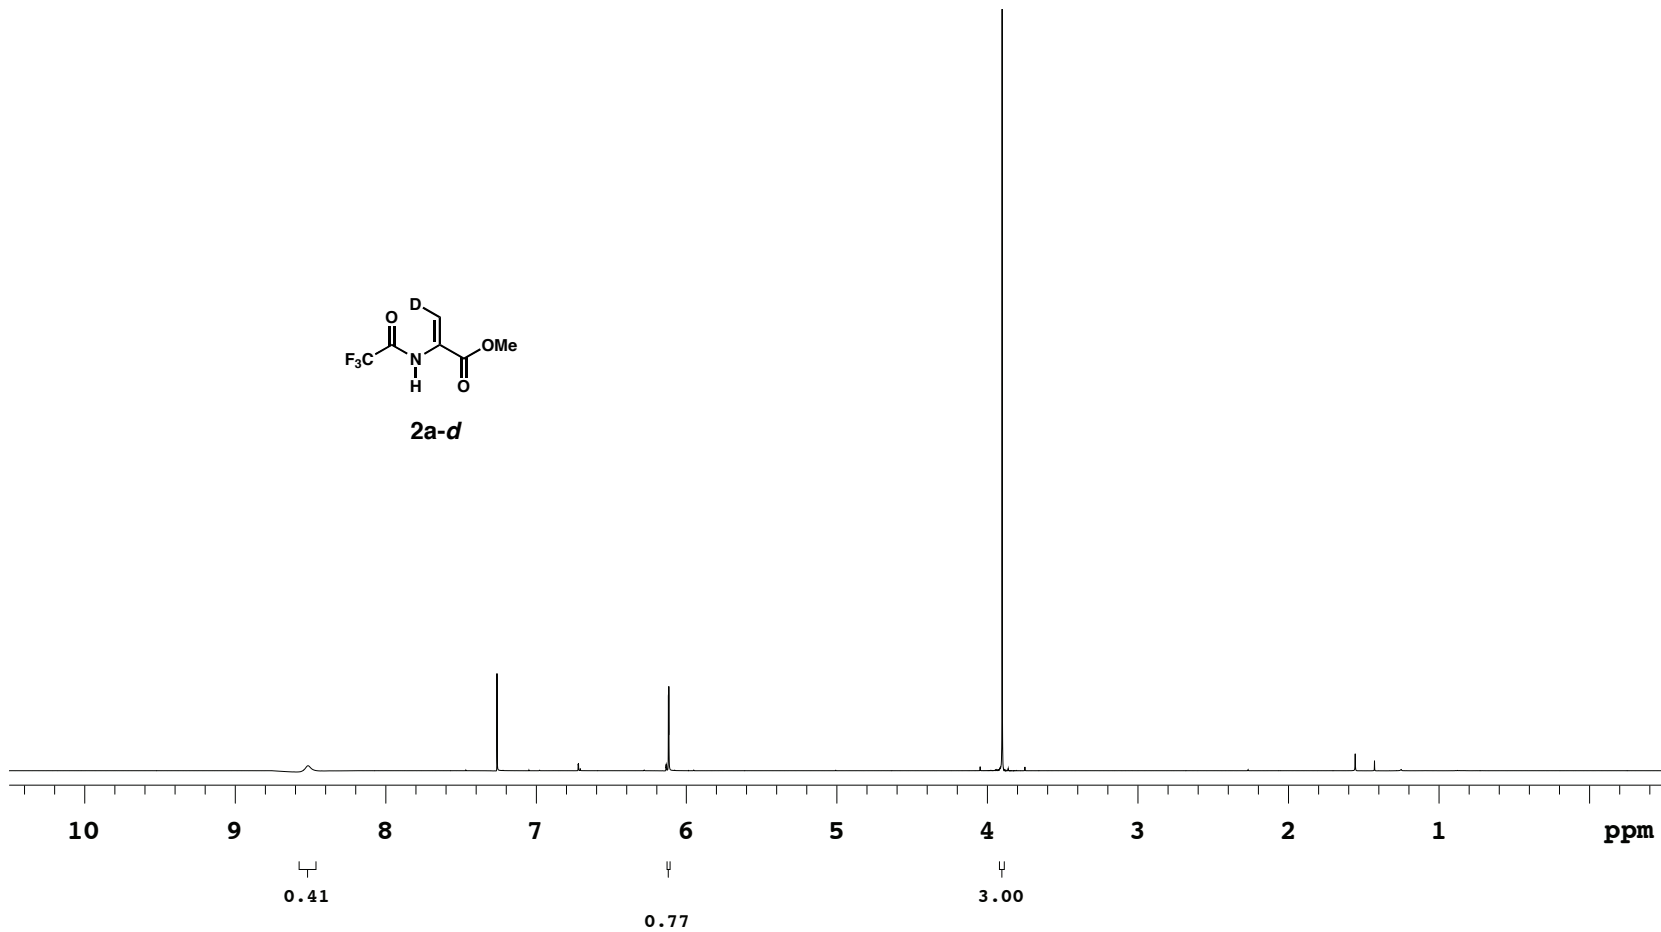

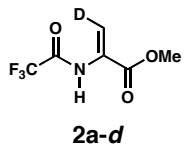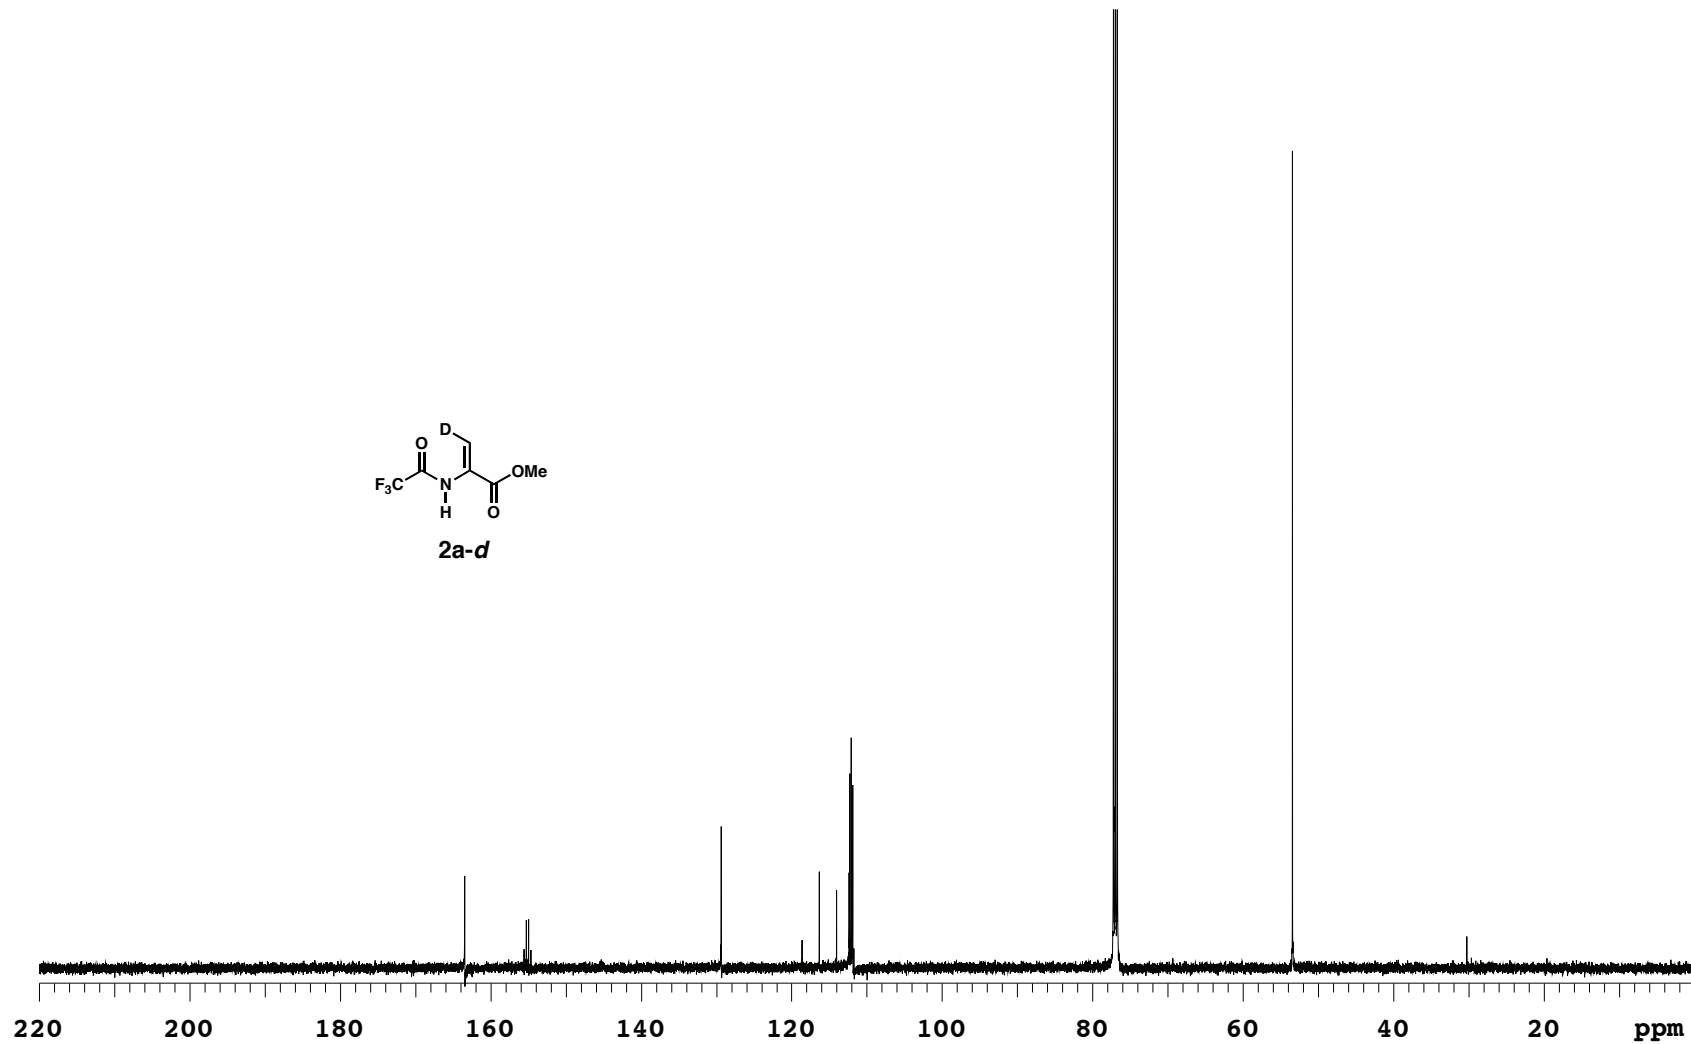

Supplement: NIHMS768906-supplement-Supporting_Information.pdf [file NIHMS768906-supplement-Supporting_Information.pdf]
